# Supplementary material for: Heterogeneity in surface sensing suggests a division of labor in Pseudomonas aeruginosa populations
Source: eLife. 2019 Jun 10;8:e45084. doi: 10.7554/eLife.45084 (PMC6615863; doi:10.7554/eLife.45084)
Supplement: Figure 1—source data 1. [file elife-45084-fig1-data1.xlsx]

## Sheet: Sheet1
t0	t2	t4	t6	t8	t10	t12	VectorControl
255.115	131.93	305.79	114.705	443.89	256.865	697.68	-5.37
125.895	130.04	443.29	165.035	116.78	313.915	366.18	115.69
117.505	56.43	133.34	347.035	220.17	74.085	99.07	35.3
223.615	339.26	54.18	81.925	425.61	-8.025	32.74	34.52
72.055	110.21	130.23	215.595	617.73	253.695	247.18	115.08
145.835	114.1	297.57	142.145	420.84	736.695	404.24	26.41
98.615	126.37	211.12	183.865	671.17	280.535	626.85	66.35
131.895	133.48	-13.27	67.095	858.56	35.535	56.57	204.13
139.165	-11.96	286.79	110.095	480.67	41.585	543.01	59.54
215.945	64.15	5.84	1.865	170.67	103.415	311.29	64.82
194.725	236.6	228.29	86.705	568.78	114.415	936.4	23.38
181.725	252.54	193.84	448.645	252.5	35.365	291.29	137.19
73.445	75.66	5.06	462.925	706.34	129.755	215.4	85.59
67.895	154.04	135.72	712.325	429.28	40.865	424.4	84.52
188.615	83.9	23.25	141.665	871.67	349.475	368.57	59.85
168.835	45.99	4.19	165.905	570.23	323.805	487.57	47.52
115.665	116.13	2041.84	107.945	327.84	715.195	538.12	96.34
84.895	-31.78	-2.08	127.185	628.36	139.755	69.62	118.48
99.505	283.82	153.92	165.185	485.49	83.415	664.35	24.83
19.055	104.78	231.23	300.375	144.43	252.915	618.35	127.06
247.395	83.47	173.14	192.695	562.21	310.475	500.24	119.43
189.005	157.41	377.79	325.125	813.78	543.145	94.57	34.76
176.945	20.83	-4.53	67.165	320.09	1260.31	90.51	18.58
122.665	94.71	0.09	97.465	166	141.415	184.79	89.98
218.555	144.91	-22.86	100.595	40.97	72.235	447.4	62.69
268.395	512.42	234.64	427.515	299.05	16.855	386.74	19.91
181.155	805.87	691.05	325.995	103.02	50.235	1091.46	54.54
250.395	108.29	28.16	380.305	682.17	28.575	54.01	86.28
225.725	416.79	-13.91	427.775	144.44	157.235	87.18	27.61
126.205	64.87	154.28	37.075	364.25	191.335	207.51	62.91
154.295	283.96	580.93	23.275	55.09	360.145	203.57	99.88
64.295	-20.13	182.45	161.655	177.91	494.375	525.46	121.95
90.725	400.57	7.31	55.015	145.87	147.335	915.4	70.66
168.455	63.68	500.01	87.165	125.87	266.665	414.4	43.02
183.365	407.73	56.58	57.205	75.65	441.115	379.79	60.06
104.375	189.62	585.33	159.545	91.1	67.795	202.74	68.23
133.115	179.12	182.65	79.285	294.1	100.565	477.29	82.95
70.685	398.27	198.8	94.105	181.28	536.475	507.62	52.19
162.245	112.89	-7.19	64.895	115.61	497.205	484.01	80.32
159.375	73.39	320.31	120.155	58.49	376.305	91.24	11.22
231.815	98.19	-4.02	45.855	667.88	101.255	415.57	5.55
146.635	1553.69	-35.72	207.195	88.67	42.695	453.57	77.82
156.635	129.19	69.72	65.525	173.56	654.905	332.74	63.29
229.945	-17.48	91.2	83.875	536.56	296.435	316.29	81.25
225.815	66	144.4	63.975	82.34	346.735	845.12	83.47
208.725	182.08	222.85	756.085	517.2	51.255	53.49	53.86
298.375	43.78	498.62	332.485	477.41	374.085	8.73	63.6
134.945	89.56	60.88	38.395	170.1	490.995	640.25	64.05
96.295	60.93	61.78	101.515	102.87	87.825	360.06	16.71
-4.475	134.08	195.51	80.325	95.27	480.695	372.97	63.8
103.645	452.5	220.6	123.485	610.52	206.475	506.54	40.61
97.645	107.29	785.17	256.425	616.94	390.795	2.09	61.9
142.305	64.08	57.26	81.625	581.27	214.425	386.36	93.6
152.265	72.43	499.74	108.995	69.85	782.475	1025.09	20.74
89.765	363.42	126.49	85.345	338.11	268.265	792.07	107.67
146.185	123.18	132.62	81.505	-3.24	143.855	487.51	55.05
136.265	113.04	166.43	123.315	494.05	76.855	466.29	61.99
159.015	48.44	377.22	161.015	254.05	358.805	1533.98	113.11
170.245	20.04	769.24	1643.42	97.33	508.395	358.46	75.58
104.375	119.84	51.75	443.455	73.41	329.395	444.46	50.67
69.955	1718.61	102.52	504.185	86.38	106.095	662.46	112.71
129.535	181.77	176.01	1694.59	107.72	472.475	699.59	55.13
163.105	97.24	483.61	127.505	29.5	405.055	460.94	81.73
167.455	88.33	49.92	167.865	453.87	987.355	274.55	31.19
85.315	95.85	180.04	84.975	56.65	376.745	256.42	91.99
152.025	133.65	127.34	71.275	107.79	472.615	422.64	-10.09
184.875	49.43	125.18	65.225	94.05	138.105	524.72	53.7
104.135	122.01	221.68	246.675	104.51	142.215	554.97	67.61
193.465	61.62	278.48	446.665	68.6	72.435	434.43	55.1
83.535	1483.36	79.4	121.185	33.71	111.885	934.97	61.35
72.985	31.88	126.79	70.595	24.34	97.665	906.76	39.44
86.725	686.72	481.68	84.445	85.48	264.545	615.81	58.99
63.155	82.01	442.32	91.905	560.49	124.805	768.43	52.48
38.435	114.85	52.77	110.915	69.25	129.295	498.76	81.28
129.115	158.26	99.69	90.165	761.17	398.795	378.72	86.07
125.265	211.07	50.33	80.265	818.22	564.765	506.43	136.25
95.615	82.59	36.42	160.335	168.28	79.905	274.81	164.85
100.295	134.92	166.96	126.865	92.06	188.265	1177.28	113.26
203.295	384.46	52.4	681.085	477.49	198.145	437	95.04
127.935	139.8	11.08	878.225	196.93	24.235	336.68	128.48
98.905	127.59	278.43	88.115	178.7	347.345	434.6	69.82
124.185	186.74	74.96	119.955	614.91	11.475	456.37	99
233.615	121.04	39.08	379.465	62.27	117.315	254.72	69.37
186.685	167.19	250.41	133.755	74.12	31.375	531.03	61.04
97.765	9.68	-1.81	119.075	989.02	12.925	415.33	135.04
187.405	78.95	97.86	135.465	111.94	1226.66	980.91	131.76
234.005	189.75	125.61	422.675	271.32	60.005	437.18	129.14
86.005	492.83	345.14	191.535	81.49	79.115	340.99	40.36
113.035	115.51	90.79	183.745	97.29	238.685	286.91	50.82
113.315	138.04	83.17	133.935	374.43	95.475	877.42	119
112.065	115.86	180.29	130.055	1121.75	114.175	263.94	138.71
132.245	148.66	194.41	83.265	30.1	33.745	84.05	63.8
162.125	63.01	292.59	159.365	32.45	441.445	114.82	36.69
33.255	201.3	176.66	376.455	335.17	653.715	869.04	37.98
215.225	96.73	34.75	163.815	39.27	93.105	996.4	52.74
143.995	418.21	77.81	118.485	42.5	45.505	196.85	64.93
169.955	17.07	121.58	112.735	425.1	120.935	329.02	174.72
115.395	497.67	47.11	423.535	406.24	154.965	1244.92	69.1
108.855	133.88	108.71	425.555	44.02	631.865	64.61	111.06
142.595	47.8	218.73	491.415	88.82	63.005	99.81	54.88
74.495	143.63	80.41	215.455	468.14	926.505	894.16	20.06
111.205	117.69	1640.11	590.415	947.94	621.895	646.26	238.82
529.565	725.91	99.04	170.56	173.83	626.915	17.65	82.98
136.985	112.67	143.43	463.51	110.69	629.525	835.23	18.27
144.245	312.48	522.41	144.23	746.01	224.365	439.36	159.04
148.945	77.53	313.81	250.01	87.6	263.395	492.03	95.14
162.915	52.89	329.46	451.01	368.09	970.755	326.33	101.26
345.425	164.71	523.01	248.73	577.85	98.625	363.94	49.4
163.845	58.97	57.95	86.78	500.4	53.675	434.23	57.85
73.275	123.37	102.71	100.17	412.535	275.875	307.68	61.52
136.605	82.36	60.69	291.56	71.865	465.105	174.65	43.83
86.935	149.54	1083.25	268.67	323.925	212.715	1034.71	133.04
118.995	197.84	262.55	179.28	142.535	240.035	281.47	102.19
84.635	203.67	332.01	252.51	79.865	283.425	80.5	58
99.335	128.02	95.82	201.73	187.255	573.215	333.95	34.19
89.275	88.99	109.84	237.01	19.475	247.045	428.68	89.27
124.465	1109.83	80.98	141.28	586.315	333.115	474.5	130.04
151.165	161.85	897.48	106.9	19.865	168.355	467.05	33.36
140.225	188.85	261.54	83.62	323.865	208.035	39.62	84.7
387.695	626.06	354.37	382.4	200.475	69.125	573.74	109.93
172.405	87.72	436.32	442.22	273.645	130.385	474.57	126.24
133.225	74.11	192.04	67.22	240.145	24.295	83.71	106.94
222.695	230.8	140.71	264.39	189.255	197.785	787.1	123.35
152.485	482.28	182.71	322.14	12.035	48.315	994.76	61.12
166.095	181.74	154.37	169.54	643.865	1142.61	48.46	76.82
312.015	111.85	93.1	8.8	719.975	222.435	213.57	31.02
92.585	130.39	245.71	189.13	235.985	254.645	526.87	54.29
131.325	87.94	34.28	34.17	792.895	464.145	66.57	124.41
79.555	59.68	109.61	16.76	367.325	342.515	373.73	82.51
174.865	164.2	135.31	73.34	48.225	251.255	842.07	29.71
347.255	130.12	152.31	112.34	32.555	309.905	65.97	14.99
118.335	181.08	11.81	55.09	102.625	125.715	325.09	50.49
156.145	647.36	855.33	369.69	268.265	462.095	350.65	112.76
169.025	832.29	120	1550.69	110.765	164.395	291.13	60.02
44.565	176.52	92.08	331.72	267.395	570.285	338.85	138.71
116.485	608.26	159.04	626.34	187.905	462.925	353.68	86.07
210.335	138.31	682.61	461.46	335.735	207.985	62.68	79.41
183.065	8.46	603.43	25.38	185.905	527.315	525.16	35.88
54.065	93.13	1072.95	1.58	217.515	337.295	687.52	125.46
274.725	34.26	172.91	70.91	69.735	219.435	528.48	69.38
109.135	79.69	33.5	471.4	527.075	420.565	509.54	62.23
364.215	59.49	1129.5	29.16	413.035	482.985	913.07	117.16
92.795	1779.84	129.21	87.45	40.285	282.315	850.75	126.44
196.355	706.55	192.79	105.88	501.785	930.235	485.44	91.8
76.275	118.71	1131.04	8.45	50.825	147.525	413.14	84.17
166.355	804.33	91.77	50.13	254.955	904.395	176.35	-3.83
63.775	150.5	153.66	510.95	199.195	164.245	529.01	-12.44
234.945	210.62	79.16	353.02	144.885	98.295	761.87	-7.71
204.895	116.76	131.5	65.02	16.115	68.105	103.58	91.45
99.415	276.42	77.92	78.77	97.105	139.145	769.84	104.34
121.175	407.91	201.67	97.27	119.105	169.485	904.76	25.23
91.895	220.44	631.52	100.2	126.335	325.975	321.32	15.84
209.175	1034.96	772.23	541.77	99.225	375.515	616.4	56.79
301.705	281.28	200.3	356.05	222.075	277.465	347.78	60.78
163.285	274.62	38.23	366.81	769.395	191.745	1039.21	43.43
85.605	122.27	64.78	1134.12	31.575	476.425	427.43	27.31
153.425	456.15	742.58	404.12	310.995	646.285	1029.48	-12.69
267.385	1702.92	53.22	76.87	89.185	368.795	715.58	25.54
133.205	719.76	1350.08	81.34	112.865	484.565	401.63	20.73
150.675	141.965	156.68	85.01	542.895	630.465	339.9	14.51
180.505	68.915	130.11	287.42	208.175	331.245	551.86	31.51
148.505	197.245	33.57	266.58	354.585	637.965	348.89	18.91
64.015	222.135	129.74	271.52	91.765	295.105	463.99	10.16
156.395	139.245	168.44	576.23	190.835	597.025	792.24	-3.59
212.635	270.575	22.31	604	90.295	576.235	397.41	17.37
67.835	1054.8	65.61	161.75	330.095	666.455	498.98	50.41
272.065	18.415	542.77	265.9	459.265	381.895	1093.11	27.09
28.705	154.965	1442.41	108.96	186.515	601.665	658.4	38.05
124.375	61.245	107.36	400.66	180.035	323.215	467.27	44.63
255.865	252.025	137.88	80.84	77.475	296.785	816.4	51.53
183.105	55.855	159.72	329.66	157.065	507.595	975.72	54.8
157.785	179.915	285.81	470.46	290.095	405.755	277.08	52.2
108.305	125.465	171.3	213.66	63.395	383.615	638.14	39.33
156.835	249.245	189.65	409.72	291.185	396.695	557.41	45.83
135.595	72.135	59.27	51.13	55.125	442.545	389.9	50.18
227.345	216.635	32.91	639.5	104.595	405.185	531.9	25.18
194.175	81.995	90.43	93.93	42.745	269.22	480.66	26.12
116.365	177.735	41.23	225.64	560.535	367.27	619.17	20.76
126.435	187.995	98.23	37.38	71.175	47.61	698.24	24.39
117.615	1746.29	183.88	79.98	78.225	360.88	649.25	57.7
159.605	863.285	66.95	-15.77	580.565	414.27	560.86	34.64
111.005	250.185	105.38	555.59	509.685	409.77	247.3	33.34
125.195	145.425	725.13	386.81	798.775	604.55	442.55	66.79
135.355	145.355	123.25	85.35	458.405	81.27	651.06	21.58
118.055	1641.54	54.16	378.76	106.085	403.72	1160.67	3.09
112.115	86.125	1497.92	381.42	89.935	82.16	1242.46	13.49
113.525	75.305	95.86	121.61	440.705	408.99	880.965	9.7
126.455	115.495	108.86	78.38	375.055	48.16	217.385	33.32
112.235	184.115	81.04	94.74	69.135	701.22	165.495	52.38
149.575	-0.105	120.8	786.74	27.635	320.16	251.435	5.13
85.905	81.025	49.57	203.15	49.325	570.99	18.385	36.82
100.695	886.155	73.54	165.56	436.175	374.27	418.715	55.19
134.815	29.285	68.53	365.05	64.475	62.88	1218.38	-2.33
185.215	74.605	186.15	80.66	74.715	508.49	90.655	51.45
160.475	103.025	137.41	66.86	6.855	247.11	626.885	26.04
73.735	79.985	74.48	164.49	104.535	607.16	513.325	50.73
180.995	10.105	77.04	635.04	104.355	516.94	145.385	81.46
80.985	584.355	140.85	119.01	58.955	203.05	148.005	0.7
144.265	1321.07	114.01	685.96	45.885	22.99	51.325	61.68
129.815	241.485	1147.82	129.26	439.345	241.22	421.545	34.63
135.865	126.375	164.07	105.86	107.415	109.27	208.995	28.42
115.575	165.355	84.2	908.48	32.205	307.49	150.605	35.63
199.065	506.435	563.43	681.61	130.955	506.99	178.935	63.96
157.905	76.475	182.36	326.04	590.605	564.38	189.715	11.19
162.225	1360.97	114.88	125.61	66.985	69.98	220.655	49.83
124.325	832.335	52.28	1412.18	1019.57	280.41	9.105	-2.42
87.945	227.075	763.43	213.16	296.385	611.07	-14.615	44
156.555	63.295	99.43	145.68	90.665	306.41	447.995	50.93
97.97	167.115	314.17	362.94	713.025	81.26	733.995	4.11
55.75	1344.12	1426.09	196.08	140.565	360.88	450.435	69.75
133.42	144.115	148.84	581.26	362.565	313.69	80.455	54.44
105.08	143.715	826.31	108.33	399.075	652.46	446.315	14.2
21.19	76.675	369.72	565.45	443.835	25.46	995.165	32.43
57.75	115.105	124.67	488.65	315.155	320.64	516.835	35.5
8.81	110.925	77.63	113.86	699.925	31.38	370.355	22.25
38.75	38.245	138.16	924.55	1309.12	711.03	512.395	97.57
10.81	276.375	119.14	319.57	13.29	379.9	374.945	52.43
49.31	141.645	1254.69	672.84	309.45	545.81	670.215	34.2
5.92	503.335	49.48	120.67	586.95	561.33	284.035	29.09
118.97	188.195	136.37	412.91	604.12	412.33	196.305	44.15
215.75	139.785	599.61	473.88	22.23	209.51	351.045	42.65
127.14	81.925	286.54	40.2	90.01	396.38	599.385	33.38
90.36	411.955	55.37	522.29	312.84	654.72	444.645	55.95
104.14	44.255	268.48	134.25	771.12	89.51	269.785	38.63
68.03	81.225	134.67	134.39	46.01	287.63	277.865	47.18
105.08	89.985	74.17	266.17	260.9	616.63	312.045	39.81
117.86	895.685	172.49	789.79	621.29	75.43	391.095	19.88
60.31	140.455	125.12	336.47	356.9	95.76	54.385	72.03
352.03	268.085	107.54	445.06	430.06	436.84	516.045	20.64
113.03	1046.36	798.55	639.49	328.51	268.51	73.545	42.28
44.19	108.285	163.65	140.44	700.62	141.79	23.505	41.15
130.92	232.145	103.38	570.81	217.62	332.67	1285.73	46.36
239.36	48.695	141.14	101.83	173.52	56.51	445.615	44.61
175.89	67.175	129.69	155.2	96.07	230.47	257.805	21.37
95.94	72.505	41.64	498.74	323.8	70.25	399.065	52.28
192.46	1296.91	177.14	530.59	63.62	210.4	242.295	53.15
111.89	38.205	377.33	313.64	756.75	36.51	332.255	8.93
151.51	146.955	223.04	516.08	106.97	330.48	135.255	-0.88
123.99	131.145	723.55	570.08	136.27	104.01	437.365	49.14
188.08	68.925	74.41	483.88	12.23	121.94	721.095	16.49
167.18	151.235	457.55	404.96	3.49	46.26	308.485	35.93
135.16	158.075	147.07	1303.21	1045.32	133.48	110.805	56.84
149.61	209.415	1740.79	142.52	157.58	446.16	195.915	25.8
131.52	232.695	503.11	36.91	449.71	270	214.065	18.51
147.93	106.915	302.96	14.13	75.92	48.02	41.285	55.91
137.4	81.165	225.29	224.96	860.87	134.85	1220.78	31.35
52.88	93.465	129.79	-6.2	421.95	243.02	548.755	19.44
45.32	72.735	728.7	113.3	1.2	402.25	54.605	60.35
44.45	166.465	142.78	230.91	170.04	969.49	264.965	36.28
133.27	529.005	621.07	145.74	132.66	407.55	77.465	55.5
54.53	314.375	545.98	174.24	44.2	108.49	245.075	49.98
113.66	231.005	435.16	25.18	139.7	68.58	69.605	47.11
123.84	177.675	344.44	78.34	319.37	216.27	84.605	121.15
131.49	152.585	830.12	-22.86	294.16	220.4	219.005	43.77
96.1	-13.325	524.69	24.62	80.38	310.05	57.735	15.82
109.88	134.885	542.41	144.14	133.46	383.26	75.245	146.27
130.88	150.825	357.94	424.67	28.66	212.46	378.385	8.93
152.67	144.005	358.987	1085.67	269.5	58.46	486.445	70.88
176.29	184.855	373.377	145.6	1021.24	505.02	42.185	77.82
77.38	59.115	708.377	29.41	537.16	550.09	333.445	37.64
155	521.095	46.5967	220.63	171.62	320.84	-3.435	87.47
99.88	98.765	9.9367	499.24	937.21	286.91	512.955	96.43
79.58	842.745	171.487	735.07	215.29	360.61	179.605	33.66
139.58	752.855	457.207	398.33	193.43	208.91	71.215	25.67
115.92	247.225	541.547	75.28	160.76	502.11	268.655	83.71
214.83	12.435	224.097	125.03	274.76	181.47	5.945	12.63
250.08	92.465	50.3767	33.07	87.98	134.99	132.735	89.21
106.63	34.525	-4.7933	454.74	61.59	851.23	725.095	110.14
145.08	124.885	189.817	259.57	93.59	716.47	442.015	70.91
70.67	98.635	-22.6233	454.82	50.72	437.47	13.155	98.69
99.33	923.665	476.987	428.07	116.82	37.97	873.705	101.06
209.19	847.165	-23.5133	104.49	32.85	292.65	133.075	111.77
80.87	106.275	167.657	65.92	820.05	304.82	108.185	50.65
147.4	-15.495	264.817	63.59	53.27	417.53	87.385	67.17
74.02	1139.29	457.117	143.43	77.62	55.65	224.995	48.85
135.9	153.585	72.5467	-11.14	149.14	1081.81	368.795	-19.18
49.71	273.095	246.927	295.51	451.36	118.69	41.155	107.46
145.05	38.395	39.3567	195.86	310.56	100.67	111.105	9.25
82.08	103.275	186.377	458.24	88.59	455.41	658.655	91.62
121.97	98.645	63.5767	732.66	304.93	5.9	308.895	-10.82
83.97	86.935	489.227	16.54	531.15	318.85	96.055	64.71
185.05	190.805	194.787	-23.32	379.84	130.39	1240.06	33.21
109.12	119.175	135.657	173.68	213.81	414.17	200.495	52.31
14.01	270.695	270.307	185.5	68.78	9.75	222.855	49.86
128.97	159.015	1260.45	30.68	566.89	242.28	393.805	65.89
154.9	634.855	495.137	71.46	104.32	353.85	266.345	20.69
58.6	50.755	389.987	67.72	83.26	65.55	786.295	46.3
129.49	208.775	246.757	89.39	448.76	459.27	123.265	104.73
169.71	171.825	148.917	64.39	137.76	28.08	41.845	97.6
209.68	322.705	144.667	103.46	396.82	290.93	616.145	2.09
138.32	1850.6	1233.59	601.87	211.45	157.88	396.765	71.39
117.79	35.395	269.707	1928.38	162.39	353.41	133.885	66.45
145.14	580.135	69.8767	41.95	114.9	206.65	380.115	15.58
153.79	133.275	-39.4933	800.85	205.01	649.2	346.475	61.18
66.43	173.005	37.1467	64.24	111.15	994.73	122.405	46.05
196.64	181.125	54.6867	177.83	52.94	523.07	305.655	94.53
153.75	39.655	80.7267	85.93	52.24	278.58	203.845	103.47
90.57	75.615	1160.88	73.52	20.87	130.75	75.885	84.18
189.58	263.975	2.7267	56.94	851.8	634.77	250.445	105.62
81.03	517.855	2.8067	91.21	442.08	470.75	68.875	99.98
89.61	104.545	44.3167	86.77	662.86	134.16	656.855	73.21
179.72	249.855	143.467	50.37	723.89	438.68	279.235	163.41
118.82	126.185	109.657	382.77	618.64	809.85	36.085	46.77
75.85	100.255	106.397	308.77	706.17	361.04	783.865	52.5
125.55	53.575	1084.66	55.01	574.95	305.51	182.665	72.21
81.25	170.765	1472.4	64.63	386.75	135.2	220.395	106.5
147.15	132.555	139.697	32.56	108.64	303.54	177.535	27.09
253.38	757.235	609.417	213.89	461.25	80.68	305.075	97.76
352.52	24.125	57.9467	38.79	100.91	369.44	83.905	38.07
143.18	2373.26	187.807	760.89	516.19	49.59	44.985	88.81
75.92	965.285	183.057	1514.74	223	631.85	290.135	102.83
72.68	222.985	220.777	449.43	173.27	873.9	446.735	40.61
72.78	769.455	623.217	48.49	686.38	538.07	166.415	103.16
172.38	331.235	158.877	545.27	407.81	599.89	-0.685	37.52
474.1	38.285	56.0167	113.03	937.18	591.94	81.785	5.91
163.65	154.705	151.077	57.82	250.82	284.67	386.285	47.73
77.62	474.205	97.6467	-7.55	108.17	508.87	637.615	76.35
108.69	198.085	98.0767	26.24	130.13	205.01	1044.07	91.32
148.69	1110.97	65.3467	80.33	54.13	717.77	166.105	116.14
489.94	607.615	116.177	112.67	775.97	343.43	424.445	46.83
109.14	111.115	90.7767	34.91	300.48	248.03	341.985	57.39
144.43	231.135	81.0067	13.18	504.44	469.74	82.845	33.65
127.27	2402.72	85.2967	46.13	179.96	468.88	1058.48	136.47
148.1	177.735	913.747	717.41	640.08	340.62	429.535	115.8
297.04	145.655	82.0067	57.09	681.61	600.36	263.465	102.68
100.07	96.755	94.7467	-0.17	785.75	310.42	372.405	36.94
156.3	61.415	634.157	545.69	483.73	792.5	356.785	95.19
113.47	220.145	109.627	98.06	701.21	533.27	220.135	47.74
80.66	1162.14	222.007	36.69	467.16	283.05	505.465	42.12
130.54	119.835	83.1267	553.66	540.35	270.44	674.835	47.78
108.6	597.655	393.727	939.49	518.33	549.83	746.985	10.63
228.9	2208.91	96.2067	274.12	98.58	69.83	327.675	81.73
399.33	53.005	123.117	54.79	623.47	164.11	521.665	141.6
124.72	90.015	122.787	36.15	42.64	38.22	1025.43	37.89
157.45	137.645	30.4967	49.17	403.08	507.61	462.245	63.62
134.57	192.385	656.847	201.38	4.19	354.5	354.795	122.62
117.02	80.225	117.757	391.44	125.58	129.27	496.775	126.55
365.9	90.905	166.117	946.35	256.14	461.77	358.235	20.19
142.93	537.385	138.757	695.64	33.81	129.88	693.945	98.61
163.17	145.185	284.377	71.46	376.58	98.16	442.375	118.49
93.9	93.205	42.3767	143.79	331.31	153	468.545	94.86
54.07	150.255	157.537	296.71	259.86	107.15	500.295	58.82
131.87	416.755	156.107	286.18	69.47	731.58	696.195	46.1
108.43	424.575	74.2967	627.84	151.86	273.71	595.085	82.41
98.07	28.435	79.5967	75.75	8.81	332.12	56.865	78.47
168.75	221.625	153.687	444.77	491.64	251.62	607.475	47.62
34.26	1846.64	83.8767	305.89	459.69	467.57	633.585	48.29
110.44	367.265	551.037	1096.44	357.36	398.36	457.865	32.56
173.44	81.615	64.7367	241.44	501.03	13.61	276.805	64.75
163.55	177.54	1113.88	-6.64	226.94	38.36	381.195	34.23
153.98	702.71	560.367	748.34	66.61	78.61	277.195	91.14
176.46	201.54	647.687	585.36	54.89	145.32	432.585	-4.29
133.19	126.65	119.647	601.26	39.89	453.65	647.035	9.38
193.31	115.93	176.317	849.3	155.23	1074.02	805.805	46.69
107.22	571.82	171.027	142.67	30.18	31.57	420.415	40.4
130.72	920.09	165.177	297.47	220.23	101.02	214.695	38.66
59.14	266.21	102.357	756.64	105.56	663.28	460.915	12.38
170.64	628.32	93.6267	332.82	141.39	512.48	203.475	81.26
170.06	535.59	139.507	11.5	495.43	599.02	-7.025	93.64
90	786.15	124.047	110.39	391.34	262.06	259.645	50.69
105.24	192.71	172.587	370.56	512.98	537.06	498.085	-3.91
168.02	-13.41	95.6367	173.08	403.14	0.56	236.305	32.92
152.91	89.98	53.2567	552.48	169.53	191.52	362.365	52.81
140.91	5.76	135.137	241.73	260.88	857.77	153.755	18.98
65.43	9.59	61.5067	52.21	58.53	751.66	329.755	20.37
156.49	91.15	133.807	212.09	132.75	706.88	305.695	1.37
82.38	169.21	70.2867	1056.09	128.32	654.07	438.145	2.15
53.7	220.48	543.657	108.87	349.62	535.14	402.975	0.15
87.98	125.72	480.857	515.78	104.97	652.01	185.475	50.09
257.16	172.72	477.567	93.27	412.4	248.08	460.975	36.98
189.72	1806.58	493.077	83.31	330.54	74.55	233.755	87.09
291.03	93.1	52.0767	57.48	138.79	372.87	593.305	39.59
102.13	199.1	52.7267	525.56	182.58	80.37	337.975	78.31
127.25	67.44	51.4967	1375.03	758.29	136.2	337.085	33.48
100.95	115.82	85.3467	200.54	71.38	407.61	115.525	72.75
103.75	53.48	211.667	137.52	124.29	98.31	392.045	53.7
40.12	219.63	21.4567	649.48	90.13	264.5	418.285	-1.26
83.6	82.15	1161.22	677.23	1492.21	603.92	180.425	37.61
82.91	42.68	113.987	26.74	637.48	147.6	359.765	23.35
174.91	175.79	154.427	304.62	210.37	644.18	327.145	47.44
163.26	530.47	147.757	284.93	137.9	96.54	566.235	54.73
158.84	90.97	31.3367	240.19	713.02	405.02	572.925	4.36
144.98	186.8	126.997	927.37	227.56	105.05	400.525	96.44
153.07	256.24	154.647	296.01	322.16	111.21	407.335	11.98
281.45	99.28	295.647	379.97	131.16	129.19	369.295	49.21
79.51	38.8	997.967	587.19	232.31	102.94	1257.34	12.04
82.25	678.45	276.117	310.393	11.97	353.22	207.245	15.85
195.77	147.19	389.437	104.943	99.71	211.63	214.795	10.81
132.2	154.32	155.577	59.6133	159.29	483.2	484.085	64.23
79.96	149.4	649.197	151.443	159.04	147.62	710.045	34.52
97.48	124.82	252.897	275.333	117.58	53.41	345.125	32.27
81.79	245.23	715.267	394.283	104.3	374.14	130.695	27.2
202.32	322.03	99.05	736.893	394.51	231.65	683.385	37.93
136.75	175.73	1004.55	123.443	62.89	575.15	564.385	6.2
100.79	244.94	697.11	439.223	91.35	439.06	378.645	13.88
148.25	381.59	30.49	247.223	19.72	639.12	137.255	67.38
84.38	143.43	41.38	12.7233	299.25	82.19	160.645	86.54
202.44	98.46	396.11	54.9433	72.04	176.55	363.125	58.54
67.44	79.96	70.72	-6.6767	201.36	528.88	333.045	63.32
69.27	174.27	87.99	317.843	244.52	770	305.735	22.32
108.19	99.61	639.05	807.343	107.3	92.52	602.555	36.92
148.58	80.77	-10.78	12.8433	26.2	392.41	1144.27	41.07
139.08	204.96	41.22	48.4833	192.17	588.52	287.895	-1.64
71.79	148.73	105.07	115.653	133.04	90.94	611.435	93.54
121.08	158.34	98.41	123.703	431.16	378.47	388.395	21.63
135.68	143.22	164.79	195.223	45.31	1215.28	613.805	15.22
160.77	76.26	111.96	539.043	76.28	164.87	403.055	43.19
91.9	97.63	289.28	28.5233	188.34	381.52	458.355	21.57
297	232.22	-9.18	154.243	133.75	124.06	823.915	52.2
147.48	81.85	44.78	77.1533	2217.39	59.68	363.435	80.67
116.31	399.48	71.31	9.3233	862.37	273.44	665.935	43.4
194.5	411.04	380.38	30.4033	107.6	403.86	151.205	21.34
57.25	218.19	160.63	150.743	658.84	148.2	294.665	62.93
157.18	91.22	54.8	395.153	36.78	249.9	600.435	54.82
187.04	182.79	55.97	135.613	32.83	602.26	463.935	94.51
116.78	254.04	94.72	81.0533	159.17	94.31	309.435	24.93
80.81	113.97	143.38	66.8033	327.56	729.99	255.745	61.01
105.69	31.11	170.11	44.2033	569	237.03	730.785	32.94
93.04	143.36	15.36	417.463	338.89	290.81	553.625	45.76
143.47	159.12	52.74	63.7633	113.1	304.63	104.935	60.35
75.13	94.98	78.7	350.973	303.51	33.68	506.595	18.1
193.47	270.67	42.63	29.8633	100.28	93.51	384.785	53.62
107.74	454.56	15.25	128.823	116.93	103.14	338.055	50.74
80.49	113.65	11.33	71.9733	326.38	405.99	844.175	27.71
137.32	155.55	12.88	70.7833	216.86	125.21	265.105	34.13
67.74	137.52	35.44	99.3333	77.72	67.06	37.545	5.89
139.84	147.58	75.91	170.243	750.45	100.87	346.545	36.78
144.48	175.18	38.73	603.673	152.05	302.93	520.665	17.81
169.97	87.85	22.44	57.5533	76.68	321.23	97.545	45.87
130.25	76.18	19.37	0.2633	42.77	139.36	170.185	50.11
202.52	133.8	81.19	152.163	507.16	80.01	40.265	18.5
110.63	301.38	54.37	739.743	130.82	130.78	318.335	45.12
204.49	85.05	194.62	552.893	141.44	1226.13	371.505	50.42
106.51	185.21	81.91	95.8533	465.08	464.13	462.545	37.06
120.675	305.15	67.72	228.283	137.19	392.97	366.445	113.92
42.955	213.57	128.58	75.3133	76.82	248.52	33.575	53.15
262.285	136.67	1264.14	300.613	60.45	286.02	431.605	78.75
175.225	235.67	60.72	124.313	116.33	206.54	236.315	47.42
126.065	254.57	143.15	112.703	65.29	689.7	319.865	29.54
138.675	262.96	63.98	53.8533	110.47	1114.31	669.705	75.52
74.785	130.18	-47.88	100.373	29.84	619.85	148.575	31.33
82.065	34.96	123.52	407.583	1128.81	370.15	72.285	102.28
47.955	170.96	438.32	77.6433	463.53	358.03	365.995	24.43
119.565	0.67	81.55	93.7933	188.36	146.51	486.735	-6.63
128.115	239.59	5.52	89.0733	98.05	292.97	478.085	60.36
114.065	124.84	35.39	437.473	188.42	966.64	181.255	72.73
119.455	138.4	93.52	89.2833	260.42	225.86	411.855	40.6
152.505	180.81	170	814.923	125.55	117.76	28.505	42.87
181.615	160.15	45.55	289.193	118.55	724.5	1610.72	44.36
175.175	157.21	70.36	56.3933	43.41	258.07	571.635	60.33
135.005	150.94	664.94	131.253	781.27	183.17	487.025	50.36
161.725	246.36	23.61	383.973	317.88	337.02	280.115	38.94
714.395	103.45	100.13	116.003	475.45	145.01	238.835	84.29
195.255	278.33	117.81	117.423	93.14	217.31	743.415	60.58
124.725	166.54	77.36	261.823	175.99	392.95	456.585	81.38
175.155	154.67	111.61	518.023	293.98	368.62	830.965	75.69
64.965	133.39	42.74	100.473	416.38	213.52	78.215	85.9
205.035	1096.27	78.61	125.663	555.3	595.63	353.165	113.83
295.305	136.85	1098.24	94.5033	149.17	967.38	227.785	-4.58
111.445	252.15	114.76	355.373	202.22	698.39	740.005	90.18
218.895	169.28	-3.93	43.3033	214.48	364.93	240.895	38.43
97.785	164.62	189.55	117.743	733.6	369.75	455.935	53.4
120.745	161.53	105.7	122.293	328.17	361.14	311.855	91.27
161.485	147.03	413.46	119.343	64.725	687.38	362.795	123.83
175.355	155.24	61.82	449.443	39.275	335.65	474.895	131.75
164.485	176.47	450.03	124.243	50.165	406.2	930.785	103.45
82.965	279.24	132.29	126.593	779.165	619.04	690.345	156.51
167.435	187.44	79.67	352.273	727.385	393.39	75.215	68.61
123.305	218.29	-16.45	846.373	499.775	391.75	92.805	114.02
186.825	115.01	66.29	126.413	327.275	416.98	979.855	33.07
122.355	165.44	26.52	107.513	478.495	961.89	207.475	54.13
154.615	159.66	27.38	302.423	67.555	458.2	222.935	97.89
50.695	201.09	128.16	589.353	544.885	113.245	57.625	20.33
154.175	277.62	81.3	160.753	517.665	88.745	837.165	24.81
223.915	230.04	149.36	698.993	253.055	466.185	383.615	140.1
108.355	167.84	66.27	82.2333	421.385	332.295	720.405	62.16
162.615	160.15	24.09	292.263	1015.34	667.745	393.075	18.15
77.725	145.34	42.01	421.873	93.285	820.015	396.735	54.28
110.355	1027.85	1067.36	540.353	437.905	870.965	44.975	181.78
130.605	360.39	0.74	311.293	450.955	80.625	400.515	48.13
155.275	273.73	72.9	126.463	360.525	143.405	61.435	58.98
78.855	103.18	123.98	662.803	495.425	171.795	378.695	71.13
49.645	92.49	103.47	87.3533	1187.38	142.465	440.905	88.1
247.275	1292.1	52.76	477.673	227.965	55.465	563.545	109.05
116.855	137.2	209.01	189.373	564.795	-4.145	523.995	122.49
66.815	188.87	28.91	346.993	123.925	116.075	398.605	112.73
124.685	777.51	84.83	121.883	174.495	476.015	377.195	64.71
172.355	170.1	90.73	218.883	652.575	52.745	205.995	131.49
177.315	152.7	457.81	401.213	602.965	85.405	314.875	52.5
147.435	165.95	18.87	643.153	917.275	958.405	457.835	81.99
113.645	193.88	57.87	488.983	387.335	830.015	397.775	108.42
93.185	198.05	69.45	339.373	125.915	697.075	632.945	90.77
133.875	541.55	118.65	111.813	180.265	390.745	1114.88	-7.33
106.045	1120.08	67.62	128.053	589.785	398.185	679.945	96.94
118.545	175.05	39.24	383.833	338.975	501.965	344.025	97.53
56.895	264.8	513.6	368.443	737.205	370.575	245.365	123.59
103.125	113.95	165.36	156.223	807.015	355.325	684.795	40.6
238.975	260.08	194.32	319.843	1031.39	146.665	1109.26	62.35
99.275	297.05	96.79	457.193	103.995	45.825	133.395	46.17
244.245	293.83	75.42	268.533	393.365	747.775	344.445	83.44
184.775	170.49	176.31	697.323	155.525	835.735	172.765	69.39
128.625	322.86	468.83	521.723	832.365	216.375	177.915	65.76
70.435	217	82.61	425.733	242.555	611.965	621.885	99.64
204.615	59.36	341.25	430.163	255.775	515.355	574.205	69.84
117.435	300.46	117.03	351.973	30.105	358.965	183.805	97.04
107.025	118.89	334.81	327.023	65.995	436.885	280.445	86.85
116.915	143.66	91.65	825.063	732.895	60.225	588.515	121.08
229.585	253.59	246.36	156.073	461.555	51.225	376.825	120.95
93.585	1262.51	401.53	537.063	491.665	115.575	353.715	44.575
187.285	137.6	111.09	575.413	69.945	66.925	352.555	18.885
888.765	189.08	63.48	109.43	128.115	320.925	352.325	6.425
83.135	1123.35	259.6	68.32	2017.21	673.185	342.335	11.535
137.985	169.44	94.58	33.77	997.325	553.795	498.935	42.285
142.805	148.93	142.11	229.38	64.525	84.315	518.695	31.455
158.545	65.64	766.22	111.71	158.215	280.405	323.265	24.415
84.285	236.87	105.1	6.43	424.165	66.535	371.875	0.355
164.605	137.53	115.53	72.27	91.135	351.145	251.345	8.855
102.785	202.45	99.3	196.71	144.695	248.515	473.645	34.355
139.465	150.78	164.02	350.66	159.965	574.595	567.975	24.965
123.005	70.42	910.14	195.16	569.795	393.895	754.005	4.085
185.005	159.63	823.97	174.77	244.145	934.815	471.265	-16.805
122.435	659.9	141.22	352.77	162.855	64.765	332.035	29.525
197.105	232.95	546.24	466.16	103.295	240.355	532.745	0.135
48.565	588.45	918.56	707.66	47.135	19.145	457.765	6.485
167.775	204.88	157.94	330.49	12.635	4.975	372.245	9.985
226.155	441.88	322.27	123.6	110.115	238.145	585.375	15.065
204.255	113.11	152.85	563.77	586.115	371.975	425.305	22.105
39.085	189.23	495.13	648.71	413.425	264.725	562.745	14.485
113.665	117.68	16.7	32.74	724.905	48.335	504.025	30.665
70.295	114.73	42.48	194.65	646.545	64.685	83.77	17.555
93.965	281.26	54.31	606.93	416.665	48.185	432.38	32.215
179.925	944.88	761.09	210.96	906.935	777.645	87.1	8.405
115.895	140.63	116.15	87.38	629.245	123.955	259.88	46.575
162.125	301.22	475.09	88.77	63.725	341.225	41.27	54.975
73.995	185.72	790.31	484.64	48.045	516.225	203.32	30.505
44.625	1549.82	-3.19	121.31	549.725	106.375	497.49	14.465
149.225	202.89	928.48	254.14	26.075	23.405	593.49	14.395
123.265	62.49	245.48	465.37	46.205	296.255	345.05	22.655
160.925	237.45	517.7	121.45	119.095	386.255	743.16	94.075
155.365	288.55	453.18	90.23	64.405	813.965	360.49	-16.265
198.715	173.75	1.27	450.64	91.665	88.255	366.66	77.795
342.365	269.82	1182.37	48.53	119.025	990.005	236.16	122.465
82.105	94.29	133.18	702.49	639.445	70.575	164.71	79.345
85.715	87.33	1341.46	83.89	288.255	74.365	128.38	84.515
82.075	185.16	744.92	1014.74	605.585	10.145	389.1	103.295
185.555	547.89	151.32	521.6	583.015	217.895	414.21	111.735
107.555	245.05	119.89	31.81	410.825	205.395	215.88	54.905
113.785	40.94	613.63	79.39	498.345	718.435	64.88	90.085
145.785	129.11	1090.89	475.5	459.485	433.465	7.1	57.315
81.135	-4.22	12.66	154.22	106.055	182.665	435.43	67.405
380.945	18.39	222.5	51.05	58.075	461.595	483.05	5.775
298.655	614.05	54.2	60.28	158.015	351.845	500.32	181.735
90.785	32.61	25.58	1083.79	1235.57	111.155	226.66	213.335
152.555	138.16	206.87	52.57	61.985	112.955	794.16	56.735
68.425	31.15	57.45	445.23	120.515	114.445	671.43	92.785
176.055	863.16	633.33	103.63	275.035	277.375	490.63	43.715
58.705	131.11	150.91	295.54	105.345	59.445	486.09	36.865
118.025	50.66	202.52	80.87	530.125	251.125	343.85	146.445
109.425	79.22	165.22	1221.02	152.805	20.345	58.56	12.795
144.925	41.05	267.02	36.25	89.805	1001.22	426.56	50.065
581.205	70.33	94.74	1027.45	813.805	13.025	1.89	123.165
106.205	63.39	106.15	87.57	167.895	86.025	54.32	140.435
62.245	-7.9	38.87	536.28	159.555	96.685	3.66	20.035
100.785	1202.72	233.87	239.91	564.205	24.155	771.7	94.715
130.005	146.67	362.87	96.51	109.005	464.155	855.22	95.815
74.185	179.17	87.23	71.06	190.215	47.665	220.4	89.085
131.035	99.31	68.76	490.09	702.875	475.915	10.9	30.875
123.035	-18.64	1016.62	35.91	913.685	414.925	424.31	69.815
151.485	94.99	64.55	91.46	46.955	124.005	375.22	171.055
161.815	160.95	437.34	1053.74	575.885	68.535	281.08	113.215
89.275	107.99	81.65	42.35	115.745	752.065	733.67	84.795
89.635	222.63	197.27	170.74	687.085	424.475	81.56	17.225
111.305	456.81	187.06	89.95	513.585	33.525	205.25	76.825
131.745	149.94	164.37	319.76	495.085	430.845	60.64	162.805
116.455	123.29	151.13	348.49	26.455	41.875	673.6	132.005
162.905	167.55	138.13	250.63	135.605	99.465	860.99	212.545
199.395	30.68	342.77	103.16	487.865	131.435	903.08	153.655
144.055	319.59	46.1	86.5	475.395	6.295	859.51	121.955
108.455	315.22	314.17	313.86	311.915	749.465	149.29	122.785
175.395	71.55	191.57	494.51	470.575	393.545	12.21	61.685
121.395	120.72	46.08	508.45	48.315	763.995	473.38	136.395
97.905	81.64	117.4	233.99	187.315	83.185	565.62	140.405
49.855	87.8	164.02	38.06	155.505	20.155	433.49	130.695
222.665	78.55	123.68	92.74	367.715	388.965	344.16	225.785
190.395	40.22	164.49	35.98	494.295	75.845	818.95	78.995
79.205	169.6	1596.31	98.84	581.935	826.735	466.24	83.345
175.395	154.8	1419.73	95.62	732.245	155.075	400.2	95.345
232.235	278.8	159.7	592.76	317.235	490.735	599.91	57.835
120.585	90.22	22.01	90.25	444.825	739.945	653.35	108.725
167.695	286.37	142.95	107.27	37.515	479.975	435.91	92.085
93.685	58.16	235.08	629.49	594.145	508.815	263.8	59.185
255.475	10.53	65.02	461.64	976.925	573.925	264.22	99.775
72.605	220.5	777.87	79.98	450.165	533.105	119.3	103.715
92.235	118.42	726.75	109.33	408.325	470.035	298.76	145.265
97.925	73.13	91.31	192.01	434.515	280.065	332.41	106.335
40.025	84.42	174.16	73.13	454.705	728.265	171.49	107.245
132.735	74.57	56.72	383.23	406.695	240.355	521.45	41.925
268.955	156.98	153.8	187.02	1142.22	85.355	601.11	87.925
121.985	102.94	123.91	638.28	608.705	180.685	928.22	88.575
223.215	255.98	171.91	351.98	642.255	133.425	258.68	78.345
121.125	50.09	163.48	726.22	549.505	409.615	370.11	107.135
95.375	212.79	128.97	564.76	851.715	634.075	582.11	96.805
130.225	289.54	85.88	371.87	442.075	22.205	14.41	73.885
111.905	69.68	106.48	89.17	935.115	72.185	244.72	15.065
97.885	39.26	232.59	404.36	348.38	43.075	368.37	97.395
125.885	167.79	137.42	91.07	42.16	229.835	591.68	101.965
195.665	727.83	412.45	134.19	76.99	97.685	261.61	121.665
190.075	60.65	214.45	427.81	622.55	597.935	397.51	95.505
169.565	633.61	93.13	716.07	434.49	125.385	502.29	106.845
133.565	187.76	73.99	476	840.94	91.035	37.1	130.315
208.415	108.1	117.23	122.03	344.6	102.855	111.51	68.595
249.145	180.65	244.9	89.21	530.99	266.695	563.74	169.045
98.615	188.96	309.42	182.91	384.94	211.635	148.74	154.555
85.685	495.96	94.4	276.67	763.99	40.465	385.28	126.385
73.975	116.03	167.24	312.87	564.44	391.945	59.24	72.735
139.585	60.44	315.5	215.95	195.6	93.715	65.42	44.075
177.675	37.48	177.65	262.65	389.49	63.045	330.51	92.435
195.165	72.55	141.8	281.67	241.55	418.505	474.44	96.325
240.855	71.52	212.64	350.78	770.22	82.625	56.44	85.815
152.295	31.32	12.94	688.64	145.38	62.505	60.16	25.465
157.225	85.12	156.74	484.81	621.1	602.005	622.02	76.335
116.435	63.15	523.91	700.35	319.16	71.685	58.33	133.175
68.665	159.72	222.88	446.74	603.1	679.095	386.06	113.855
255.355	120.02	633.67	139.46	432.22	159.525	696.52	126.905
107.065	63.15	469.92	178.85	296.9	212.885	34.62	45.365
102.125	326.85	207.13	476.29	77.33	310.065	29.92	149.425
201.885	848.59	134.87	391.4	642.95	617.285	372.6	153.325
147.355	52.43	154.74	21.85	687.8	618.675	469.09	110.435
67.055	686.85	137.03	222.35	449.04	16.025	317.73	182.445
91.645	107.37	484.15	407.57	407.25	225.485	544.28	115.545
210.825	79.4	152.37	501.4	341.75	71.525	103.89	124.375
187.765	268.59	103.88	418.01	859.75	414.765	22.89	85.925
115.125	79.01	477.42	816.9	295.02	570.715	401.02	70.395
62.775	44.82	187.52	752.9	259.39	147.345	493.77	132.975
224.565	67.01	859.03	531.18	443.44	564.305	472.68	65.525
120.065	39.62	530.28	368.85	397.7	197.785	632.71	74.215
139.625	31.07	235.25	203.68	426.57	228.955	304.93	170.535
161.245	87.78	643.12	857.07	583.96	639.335	409.18	97.605
157.955	64.91	117.94	428.12	438.83	955.905	253.9	142.825
211.465	98.06	673.37	375.51	685.09	407.395	59.05	86.475
332.395	315.38	461.14	432.85	716.79	508.185	185.81	59.235
176.925	116.63	760.37	620.96	521.49	699.945	803.72	163.645
142.635	203.06	214.33	392.08	49.83	243.325	75.78	99.675
146.245	165.99	116.93	94.42	88.37	80.645	398.72	126.875
82.355	51.6	869.3	282.83	556.08	134.105	60.46	92.935
116.555	32.02	685.39	192.73	376.87	341.615	134.28	64.435
130.675	50.63	221.27	564.86	378.78	66.815	272.4	118.325
165.665	111.9	910.855	508.18	456.66	63.815	471.25	96.295
138.625	44.6	13.515	153.5	65.74	43.545	30.58	66.725
63.495	72.51	269.295	601.27	320.89	338.425	86.05	143.425
103.395	374.48	495.355	203.57	748.16	78.925	105.4	118.455
80.805	44.01	290.295	426.88	312.33	424.315	380.96	116.395
239.315	134.46	355.745	448.35	658.4	383.095	414.75	121.745
145.755	164.6	604.575	235.96	156.03	361.985	889.59	99.175
26.665	97.31	317.405	557.22	610.7	540.095	475.41	91.245
149.605	91.95	1065.24	182.22	228.87	1349.1	228.41	85.505
233.805	134.41	1454.74	206.72	547.16	264.095	186.07	-4.06
241.435	84.53	-15.705	618.22	91.73	567.875	598.72	41.39
126.685	105.58	1616.08	560.6	54.55	60.485	104.38	16.23
143.305	17.05	1882.62	556.43	147.37	38.265	345.07	25.75
252.265	2094.78	390.515	65.22	384.37	617.545	286.6	3.9
182.985	125.08	325.855	202.85	457.23	486.595	246.14	35.53
103.335	112.03	929.745	956.1	577.09	1194.32	377.12	114.64
129.945	106.86	613.855	433.14	473.52	114.985	584.32	31.31
187.145	111.04	794.125	538.06	19.9	141.205	62.72	33.74
184.945	93.25	259.795	342.95	594.97	271.705	399.4	51.62
121.395	185.27	74.125	787.49	476.45	251.005	560.51	84.91
187.635	174.93	168.305	567.14	672.63	834.295	483.87	19.41
105.575	204.54	858.585	555.91	287.29	403.715	552.04	121.52
133.335	84.77	810.065	421	43.63	650.165	358.23	22.7
218.965	51.65	513.255	550.99	749.59	537.805	114.57	88.41
109.605	58.2	364.115	197.61	508.69	568.075	439.71	88.35
151.235	833.85	1025.78	553.97	236.27	339.075	363.97	79.4
392.61	1312.94	205.365	652.36	66.85	298.835	1024.4	89.29
67.5	58.82	254.005	85.87	24.85	284.005	742.08	56.25
193.61	81.92	1657.33	175.97	645.01	301.745	202.95	77.87
101.5	150.04	267.595	46.38	47.14	305.655	1204.15	-8.1
176.22	118.77	400.815	360.24	349.41	485.695	277.21	68.49
46.28	72.08	1960.3	322.63	251.5	91.025	208.81	31.87
119.72	100.53	986.205	92.37	277.91	310.525	1084.38	31.96
156.34	1000.27	733.775	285.08	513.32	276.165	492.74	32.96
190.39	751.58	818.815	432.08	301.54	315.445	166.88	128.76
105	27.04	572.765	614.43	89.97	167.835	289.13	26.72
181.45	148.13	246.475	629.79	29.57	609.605	215.08	79.47
208.28	47.08	77.645	391.91	446.25	648.985	559.92	56.42
220.11	182.03	68.895	34.63	275.44	227.065	478.08	69.02
97.89	103.34	1067.27	198.24	569.97	772.025	638.45	46.04
242.61	989.01	852.455	598.68	410.11	145.405	423.72	98.95
334.95	230.68	365.725	466.77	317.69	182.865	126.23	117.98
247.72	135.37	914.805	670.77	464.81	313.985	355.21	133.27
214.72	601.05	475.895	587.56	346.78	154.375	654.37	23.29
94.39	804.85	2327.93	1030.67	525.78	500.875	216.45	109.68
218.45	93.18	17.555	286.35	330.97	119.875	617.33	129.86
67.22	1941.93	39.215	417.01	3.19	370.025	534.78	70.71
113.11	51.01	49.315	585.43	200.19	143.915	594.83	68.63
117.5	63.9	91.985	510.49	718.8	115.735	450.55	95.29
193.95	161.8	689.555	384.71	353.95	102.595	373.17	83.28
178.39	106.01	583.655	170.4	454.58	150.165	206.88	74.41
184.84	689.26	227.685	595.96	420.74	277.825	488.22	133.38
122.39	85.76	164.265	102.21	653.17	368.415	380.57	92.05
138.22	157.34	315.975	707.83	974.31	487.315	518.3	66.52
169.57	-21.12	990.465	301.5	529.55	140.455	518.38	56
114.99	106.16	393.405	190.08	1075.24	15.055	366.81	86.55
39.7	100.8	64.205	1312.93	446.13	320.115	536.57	74.12
150.18	127.16	275.015	936.03	151.19	140.515	527.04	87.17
137.14	99.53	265.715	64.94	159.99	294.775	560.17	100.14
129.14	101.67	280.005	270.08	-13.78	400.325	458.45	90.01
368.52	684.42	283.835	907.86	595.58	74.295	339.59	52.43
118.14	23.6	155.805	400.25	439.22	352.255	394.77	109.25
133.28	518.33	47.255	362.23	565.12	42.835	595.57	87.98
94.14	93.83	718.525	387.56	413.44	37.195	1022.52	75.55
170.87	59.16	1254.53	248.25	644.39	131.795	146.75	46.68
162.92	94.6	198.445	627.02	56.83	79.605	694.95	69.1
96.64	83.94	705.475	482.79	524.51	12.005	631.16	52.73
199.69	567.95	669.865	578.9	867.75	61.755	411.19	74.13
125.41	124.39	57.315	350.75	680.26	28.785	428.33	61.35
124.67	444.17	710.655	473.12	988.26	105.725	555.77	69.33
272.06	757.67	541.785	1019.18	306.15	316.515	985.19	88.46
106.85	46	1054.68	441.42	571.13	79.775	354.84	92.85
54.67	-6.3	550.465	625.4	161.92	168.135	724.49	78.19
328.28	60.73	718.565	424.55	180.4	354.045	447.13	79.41
83.85	1788.23	916.395	244.91	367.89	230.985	475.25	63.58
80.8	681.25	923.785	493.43	321.8	86.025	252.65	152.68
106.15	123.11	120.665	249.45	510.75	183.655	287.88	59.11
149.24	1233.86	587.195	933.79	104.13	206.745	423.71	79.64
234.8	50.67	274.095	625.09	266.62	154.685	472.9	52.5
144.76	280.277	109.705	386.2	449.29	353.625	898.8	49.79
436.76	4.0067	486.055	344.79	467.33	502.765	678.29	26.06
149.02	81.5067	396.855	503.85	492.38	237.655	622.92	5.87
71.98	157.727	141.035	854.87	155.29	211.045	328.4	30.18
148.12	1033.17	304.815	452.69	1079.29	-0.865	253.03	69.71
112.55	257.337	135.665	389.49	367.5	53.835	182.3	84.19
275.86	116.117	446.285	943.48	659.29	169.625	255.14	179.56
237.45	1592.56	1076.72	516.24	872.19	20.355	879.14	63.55
111.78	2193.56	765.465	280.95	649.97	68.105	1033.64	74.7
53.61	1340.4	1325.12	572.12	266.88	53.945	298.25	82.22
182.11	1049.78	379.595	81.25	242.7	73.185	333.91	71.82
157.82	635.727	486.325	269.69	315.62	379.685	451.86	39.19
220.57	436.617	41.535	566.43	305.36	429.285	875.75	37.11
81.82	21.8367	491.955	475.84	393.64	1786.83	469.41	75.86
190.28	208.337	859.385	263.96	258.12	466.485	338.64	58.13
153.22	115.277	91.335	432.54	520.64	74.115	462.08	-6.71
88.63	110.167	795.235	177.62	50.01	87.825	561.19	48.9
125.16	78.7767	1321.33	431.15	390.46	128.695	295.36	83.67
173.16	107.117	769.955	377.2	428.34	137.075	793.53	103.13
145.13	64.5467	390.705	341.8	386.07	107.795	136.41	73.95
208.2	499.737	351.895	658.15	462.32	724.395	112.97	92.48
164.97	66.3167	390.655	507.07	551.71	245.145	409.36	50.48
71.47	650.647	84.015	643.55	265.16	386.805	684.62	56.51
441.75	209.357	663.135	570.3	851.81	234.085	340.8	33.34
104.06	220.507	545.685	766.41	565.63	73.005	328.14	80.54
88.47	218.787	877.595	680.36	867.64	71.795	428.36	7.93
366.02	36.9367	1105.89	251.79	420.75	60.755	727.47	52.64
93.61	217.267	510.035	80.23	518.31	201.915	507.8	87.68
188.47	252.027	944.855	422.95	463.73	447.885	338.14	78.99
119.28	88.7867	609.365	1578.45	277.6	536.525	430.91	33.38
60.39	180.977	398.085	228.51	368.31	597.725	33.08	53.21
90.87	47.0167	594.595	528.56	466.15	270.445	223.75	77.69
153.91	169.607	1088.71	681.45	113.66	275.695	18.03	92.02
105.8	141.487	766.16	832.01	359.34	77.395	-12.25	74.44
93.91	371.057	331.88	711.12	326.29	262.315	568.64	32.61
278.84	46.6167	1407.38	428.4	253.17	424.435	723.47	83.67
94.24	99.8367	1565.88	1302.56	326.89	284.315	24.36	57.9
269.87	170.577	313.44	811.73	320.02	273.265	130.97	56.9
98.09	114.317	406.94	292.86	455.51	26.365	1374.21	123.73
184.65	213.317	-11.23	428.52	460.02	428.555	402.87	67.16
138.17	121.707	508.49	479.76	330.5	1038.32	435.21	147.59
250.95	206.617	465.27	243.48	409.13	40.135	998.16	36.05
139.69	494.587	105.88	508.48	486.44	653.635	566.45	38.33
78.28	100.087	273.71	187.3	435.39	305.565	418.07	86.57
105.61	53.7567	1222.05	396.12	340.63	261.515	317.29	29.75
58.98	60.8767	530.16	1138.29	293.53	1151.61	230.02	68.77
529.02	215.007	1301.1	177.75	131.87	439.585	386.61	66.31
79.49	27.4667	411.38	68.08	465.41	367.495	178.83	54.12
124.53	502.627	624.43	533.16	473.43	333.575	888.88	7.4
454.46	39.3367	187.95	476.2	547.4	164.175	252.88	27.88
244.6	18.6667	1876.76	494.62	621.67	324.515	296.29	12.4
85.24	153.037	814.05	587	301.32	393.325	582.83	89.46
248.6	561.487	728.43	267.58	0.85	721.905	458.06	23.38
81.42	154.527	369.79	555.74	53.69	399.065	276.32	58.71
146.53	140.067	159.29	265.81	642.3	566.235	148.19	74.34
83.14	368.377	77.61	522.66	586.63	394.915	111.45	31.64
49.96	770.377	198.61	459.81	331.02	458.595	704.88	44.11
87.62	129.337	609.02	547.69	186.24	433.98	603.93	43.05
84.97	97.5267	1020.79	633.4	491.96	921.03	100.06	54.91
161.31	240.217	1033.99	118.95	528.8	510.81	524.01	61.62
243.97	228.957	778.99	634.1	500.69	528.03	476.88	28.12
115.62	125.877	354.67	371.98	940.19	288.48	387.39	25.225
119.95	79.2167	177.71	676.87	557.35	557.92	184.39	69.495
80.85	164.947	664.42	412.51	237.02	647.31	363.76	109.105
108.65	113.137	1214.61	1796.73	147.3	138.37	184.76	42.725
86.75	136.507	234.3	498.23	370.02	162.92	541.47	34.225
143.81	125.247	1170.23	434.17	401.3	279.53	495.8	54.795
189.48	99.5067	746.07	273.34	295.24	259.48	46.6	18.065
195.48	109.057	524.19	594	584.13	722.31	873.43	20.935
121.85	156.577	226.38	497.93	640.8	100.48	618.14	16.705
231.65	173.277	68.08	216.27	754.19	500.98	789.35	4.475
139.95	147.727	718.27	360.1	948.13	189.25	590.76	25.875
91.85	313.687	108.68	181.17	20.13	346.2	36.8	47.805
110.71	70.3767	1269.19	463.62	497.76	319.81	329.43	54.695
103.98	71.4467	26.86	608.52	609.57	145.98	28.26	134.725
70.44	296.517	841.77	617.23	64.09	478.37	305.85	56.585
51.73	57.0167	990.88	553.21	81.95	515.53	754.85	50.535
202.09	128.977	1546.63	1525.44	477.19	441.75	432.4	4.315
121.89	244.547	396.67	100.86	858.61	973.98	623.41	44.415
357.12	1251.8	216.59	722.56	397.84	85.42	255.24	33.625
73.83	229.697	1011.35	40.71	823.97	456.14	533.2	31.415
113.02	151.407	598.38	347.33	418.25	547.31	367.78	23.295
161.63	174.867	548.93	579.22	206.02	580.87	451.28	65.375
138.73	74.9067	1465.62	89.71	341.79	282.03	620.82	67.895
53.18	73.1667	431.07	569.45	868.57	531.42	243.01	-0.185
175.93	180.107	446.41	658.87	1225.66	385.59	636.05	42.265
223.12	103.237	544.86	834.21	1293.38	649.98	644.74	17.875
94.18	118.767	68.51	-1	271.66	298.48	536.16	90.645
93.99	123.367	812.51	629.21	34	394.64	443.16	58.955
73.09	80.4667	941.09	260.3	482.69	373.64	515.78	78.425
104.51	188.807	752.41	426.59	163.13	498.81	73.27	9.185
216.96	156.067	1152.29	345.88	293.91	393.75	293.93	34.215
132.5	119.467	484.53	1491.83	822	278.09	507.86	32.875
81.41	28.5667	2152.67	418.89	469.35	572.81	968.53	26.425
130.69	166.767	780.99	278.29	185.27	536.98	79.75	97.125
171.56	242.997	1303.21	460.94	63.9	244.83	205.56	32.265
205.53	143.937	1501.88	439.89	114.19	467.45	475.86	59.955
93.52	166.417	755.38	266.58	533.73	72.45	546.49	58.755
115.04	124.097	316.99	460.89	140.23	128.21	925.97	62.105
90.89	190.097	151.79	22.27	106.23	363.07	329.47	33.955
155.01	777.517	1334.69	973.47	351.48	245.17	108.97	37.995
188.43	182.777	121.51	679.77	295.69	394.17	474.04	44.245
318.92	128.157	1334.79	249.25	966.02	477.31	76.25	22.505
431.4	227.287	141.65	332.97	861.06	641.49	331.35	122.855
168.16	121.837	82.23	564.48	342.72	619.95	275.31	61.765
88.31	150.917	106.68	531.76	21.75	493.63	411.49	52.525
324.19	453.247	2045.65	609.24	324.48	641.09	64.45	0.675
78.02	200.337	52.17	550.17	619.1	439.66	22.07	45.895
123.25	191.557	1251.81	482.77	578.94	506.92	318.44	32.285
119.72	122.747	1005.18	361.31	818.02	341.4	314.58	22.945
241.19	190.497	340.05	510.09	490.79	481.44	640.81	16.105
157.57	221.257	342.28	174.87	713.48	700.4	504.68	44.905
142.81	757.867	824.89	393.02	82.06	296.48	949.1	28.875
149.16	93.3567	1062.06	586.46	592.71	524.35	99.94	23.995
123.04	153.357	486.52	156.86	361.37	12.81	506.84	42.145
159.08	121.317	700.3	453.08	56.42	599.39	399.81	16.075
65.62	130.387	627.72	358.16	472.48	33.31	205.03	84.555
86.61	138.227	578.8	766.02	495.26	470.73	40.39	37.325
135.06	126.447	40.34	634.31	555.77	387.43	448.63	46.805
151.28	122.227	1757.57	367.74	438.73	531.43	-5.94	58.935
109.75	164.837	789.47	669.66	442.9	867.81	239.69	24.775
120.2	120.367	1679.8	515.63	14.62	252.04	292.97	88.015
164.85	123.427	377.54	890.24	494.38	343.66	248	56.025
82.85	101.337	2129.45	635.98	745.79	323.43	708.21	-13.505
279.55	196.837	316.01	500.53	582.97	257.27	377.18	39.135
195.66	332.897	1711.09	710.23	832.1	370.54	197.62	0.065
152.52	364.687	1241.65	544.35	147.58	328.85	23.18	27.085
97.44	87.1767	1074.92	181.26	156.23	584.69	525.83	21.875
192.04	121.637	764.27	599.12	1361.65	302.39	499.66	31.995
121.38	71.1167	1331.46	516.35	355.97	373.16	272.28	31.925
185.84	93.8367	1126.03	518.13	476.13	516.93	111.16	7.415
118.05	208.027	518.14	1019.72	536.49	38.38	381.14	38.675
170.64	165.887	1224.51	712.71	849.77	612.57	363.39	6.795
113.46	128.347	418.7	373.88	576.71	496.05	635.03	18.405
110.13	1733.58	1050.36	254.03	632.83	281.31	362	53.055
170.79	149.077	711.51	983.73	35.21	53.85	367.92	18.645
132.08	337.197	515.73	25.29	631.22	335.27	580.89	45.865
44.85	793.657	570.07	319.95	448.22	436.67	216.89	26.905
196.43	1885.07	944.95	424.95	212.46	303.49	469.81	36.875
105.04	175.807	832.07	248.45	630.14	539.42	192.97	68.955
135.84	156.257	999.18	421.17	825.58	575.69	56.46	54.935
122.77	1387.52	158.62	513.56	526.81	410.24	238.54	-17.815
110.89	362.107	943.68	194.17	575.8	345.59	138.86	37.885
57.94	863.427	1686.34	810.12	251.19	461.69	965.05	15.105
145.28	154.177	846.07	252.84	33.77	59.07	448.94	78.885
152.23	180.837	819.84	1020.4	387.78	368.76	420.68	53.675
171.72	189.697	731.34	556.23	609.88	67.59	550.47	13.955
154.18	564.837	159.4	793.34	1159.07	483.86	285.35	35.655
207.42	412.517	617.84	627.73	554.54	343.34	661.82	7.185
208.02	158.817	161.4	758.4	24.66	1749.34	141.92	5.995
62.72	802.637	16.45	512.06	605.77	325.34	708.16	8.015
97.47	124.547	884.68	722.29	475.05	846.18	456.09	49.075
74.54	379.207	63.56	260.01	1027.96	537.41	80.56	31.265
246.96	260.967	256.13	470.84	507.78	276.99	292.97	60.955
96.3	195.247	1413.1	899.62	308.41	410.84	276.67	12.565
202.01	96.5067	306.15	248.4	483.65	237.28	477.04	40.745
188.21	172.987	448.51	260.45	164.76	447.5	458.36	15.815
216.08	110.027	18.47	622.62	694.97	311.84	299.28	36.605
142.92	175.857	62.12	630.71	585.89	456.53	334.3	-6.045
384.58	354.837	99.68	426.61	470.9	156.15	253.88	21.645
121.85	70.5767	261.25	564.37	415.99	508.31	744.9	16.115
80.28	722.017	469.77	181.8	346.95	235.56	410.52	69.825
118.28	502.547	2445.3	308.64	34.17	731.15	42.4	43.795
121.94	145.957	1656.39	254.55	539.64	751.4	337.82	19.535
111.07	406.757	1410.55	445.5	174.43	421.04	200.6	34.645
103.92	394.097	126.93	232.14	358.75	580.07	900.8	28.525
90.26	192.357	493.89	390.4	521.97	809.04	469.87	35.645
120.61	124.427	485.83	465.8	487.25	646.05	466.69	24.715
148.3	188.767	713.51	492.19	530.64	477.94	426.75	13.105
112.79	171.447	317.43	816.19	374.92	150.02	114.45	25.125
153.48	582.607	484.7	157.27	321.36	389.53	388.91	14.465
222.98	170.927	362.13	810.18	437.69	153.06	138.65	49.145
163.3	112.177	595.63	222.98	581.08	287.14	638.85	28.775
171.2	195.387	251.51	149.36	541.03	235.03	343.54	10.195
295.69	206.867	328.92	113.35	1099.19	458.8	110.72	51.995
50.16	204.527	306.97	874.23	421.08	364.01	441.85	57.805
122.61	193.727	1071.94	133.65	1089.75	433.04	480.2	82.91
189.01	194.727	1164.15	679.65	427.53	741.63	520.57	9.94
230.82	110.407	875.22	491.31	347.69	324.55	171.06	59.62
95.34	148.897	427.58	566.38	282.14	366.44	601.97	87.87
173.75	138.117	62.01	655.08	840.08	398.8	537.6	45.18
168.22	101.897	1472.34	498.34	470.25	182.41	157.93	80.5
166.77	114.427	1365.16	298.87	511.92	480.77	159.92	74.71
164.56	855.417	238.54	661.55	511.08	574.56	259.49	53.54
68	179.957	100.74	1399.91	449.64	370.08	335.13	69.68
166.98	441.547	705.38	799.33	551.03	250.48	494.81	57.62
54.45	428.707	475.96	676.13	239.89	340.56	860.29	15.28
199.02	979.417	1795.82	638.06	343.7	509.83	2062.63	-17.61
130.3	477.177	601.84	315.73	838.42	321.31	204.71	55.66
158.97	590.627	922.96	491.93	34.18	291.16	483.71	49.93
189.24	100.94	154.96	538.13	417.89	506.16	565.1	106.81
141.39	229.99	483.39	505.68	498.37	80.76	582.27	48.39
361.33	86.1	82.92	444.23	500.48	363.88	224.29	81.95
115.78	127.16	1241.6	445.36	691.25	318.64	301.8	49.64
208.14	484.16	30.69	567.2	315.39	199.98	725.63	12.87
193.03	730.44	455.15	463.99	724.36	514.17	491.96	71.56
175.68	89.77	1358.54	119.71	267.4	629.54	264.18	83.16
89.8	417.6	233.73	266.78	620.79	404.82	523.27	67.77
87.83	716.05	85.81	489.68	47.32	175.38	478.89	28.85
150.5	70.99	635.3	427.5	816.79	690.49	815.13	69.7
93.55	6.71	915.84	189.52	238.79	676.84	705.53	31.02
201.13	127.05	453.05	843.91	430.25	687.33	574.24	73.69
100.67	540.49	822.53	355.85	87.29	322.15	564.39	104.96
181.95	198.6	670.88	849.41	455.29	864.98	1141.42	85.75
153.23	1590.33	1318.07	943.34	253.79	282.22	581.55	30
163.16	221.83	319.06	795.9	517.83	202.61	314.2	61.52
176.81	338.27	386.21	63.2	426.94	562.09	671.92	40.28
169.56	657.1	1561.56	545.85	578.71	1144.16	266.92	47.12
171.15	1027.96	381.56	707.77	372.63	510.75	449.83	61.81
155.58	2371.77	959.08	560.41	495.9	226.78	852.76	113.45
232.68	200.01	670.21	806.39	209.08	407.17	592.72	57.76
120.74	909.01	671.9	633.2	126.23	232.43	606.94	100.4
200.84	133.48	688.37	424.38	511	197.43	554.43	54.22
232.05	602.01	81.9	524.61	509.57	73.94	426.77	66.87
249.11	1509.87	1047.61	61.08	76.34	140.87	182.44	60.18
233.14	85.63	1130.31	180.28	430.23	452.06	1137.21	118.1
369.74	2351.06	1255.07	502.43	513.82	456.37	-13.34	37.54
132.02	217.27	557.61	634.3	424.13	302.98	361.49	30.91
146.26	2298.18	398.55	614.96	427.51	430.04	225.32	135.54
127.46	476.45	562.01	497.18	240.22	841.52	547.71	51.62
219.9	165.94	873.6	804.3	223.78	547.54	554.32	106.66
210.83	612.29	875.89	85.66	383.3	651.31	608.16	135.38
187.91	617.29	633.72	659.09	228.85	259.57	160.99	111.02
58.5	509.34	441.61	606.73	244.43	361.99	1042.49	58.85
215.39	854.51	745.95	928.39	374.04	370.58	948.99	71.06
22.72	205.77	300.56	372.53	467.4	412.38	317.55	39.66
112.89	95.81	468.29	384.59	534.4	382.07	383.77	77.62
137.17	993.73	391.01	729.34	811.88	326.27	427.6	51.08
50.28	1098.73	719.45	1080.87	735.19	276.79	226.05	62.66
150.72	402.56	1023.46	510.39	348.19	996.44	368.71	29
176.33	106.77	225.27	538.52	108.81	625.49	619.55	108.25
121.05	473.31	762.64	328.43	452.27	1275.75	407.05	-11.07
217.94	366.73	558.54	68.86	239.34	157.78	277.99	112.85
94.11	51.35	454.72	856.84	851.22	329.56	34.38	36.39
173.33	506.46	2792.25	866.92	579.38	309.12	315.77	37.82
171.55	27.23	577.73	673.38	655.81	511.85	207.49	33.13
152.17	906.27	1003.98	282.23	416.69	272.49	320.88	104.08
24.83	51.68	851.55	365.41	802.78	377.36	342.94	74.58
120.11	1817.92	830.42	1000.28	659.5	543.21	915.82	71.39
251.67	289.66	938.72	161	55.39	546.25	300.82	28.32
172	214.25	878.11	791.3	138.56	508.19	215.55	18.33
899.44	1025.21	31.72	277.46	296.05	631.97	411.71	140.75
196.94	419.23	1554.61	321.71	436.67	152.08	498.71	78.46
244.33	54.77	554.22	485.33	317.47	436.97	28.21	40.78
139	470.38	1134.72	423.26	378.26	511.52	523.32	67
115	61.7	850.89	820.49	455.29	203.3	262.6	82.66
136.94	1115.13	200.17	420.57	663.3	479.19	357.38	94.54
200.55	897.63	47.72	694.59	502.6	432.52	521.27	118.47
215.83	43.88	478.67	501.9	330.23	518.8	371.24	40.04
136.05	350.41	1551.61	523.36	261.18	238.75	339.86	47.17
165.55	272.73	1133.61	601.53	291.77	405.52	901.14	106.05
348.44	158.98	99.78	708.88	444.82	191.81	446.81	21.46
97.68	1099.34	6.05	1366.96	127.52	349.05	221.67	61.27
198.11	354.4	1135.5	561.22	680.64	251.6	930.76	98.24
106.82	42.8	179.21	462.48	385.3	215.01	730.7	53.61
172.06	778.77	454.44	1038.38	655.9	486.87	336.7	39
217.97	1132.22	98.59	447.14	640.2	497.28	553.03	32.28
192.21	150.84	844.06	353.54	334.88	227.76	264.21	107.11
100.3	288.94	1096.25	1694.84	214.56	892.61	141.64	90.31
117.87	65.51	425.81	196.84	656.46	564.36	875.38	45.12
115.82	385.9	1093.76	1810.84	305.13	130.65	385.16	31.27
123.97	2352.8	187.02	514.45	304.38	7.47	307.29	138.56
157.66	183.9	633.28	286.12	609.94	188.38	466.55	90.22
265.87	130.87	657.81	998.39	624.83	197.92	648.6	66.19
85.82	1337.33	1469.65	103.67	320.89	316.84	473.29	27.02
183.75	630.99	974.74	94.62	239.75	244.77	582.64	46.02
86.25	1300.77	963.03	-7.22	499.08	19.54	612.59	60.24
95.29	93.25	861.07	280.78	90.25	619.57	334.26	52.31
94.75	171.3	1361.32	597.39	498.79	419.5	202.09	27.78
202.47	236.45	700.15	1305.78	332.55	215.6	87.8	103.42
71.85	154.27	1487.38	447.89	281.59	142.73	395.22	52.77
64.46	434.56	496.92	213.23	200.65	259.69	1421.76	30.88
181.41	59.42	646.76	14.78	404.17	451.08	-3.81	73.69
90.68	845.39	230.15	227.67	1065.88	505.05	405.69	90.46
164.07	154.03	73.78	504.67	550.78	231.23	446.26	113.57
150.07	1074.27	1570.41	516.73	315.87	105.73	418.07	63.49
223.94	566.57	196.89	499.17	627.64	203.43	263.5	53.28
92.94	61.4	358.22	414.06	200.8	374.33	450.57	44.24
151.46	318.58	1067.54	114.45	465.25	275.19	547.53	42.02
177.98	68.52	727.15	180.45	167.86	331.47	347.5	59.78
109.46	684.69	910.21	68.51	285.25	358.85	476.42	51.53
234.2	1119.16	82.04	60.71	34.14	650.8	389.53	41.32
58.64	536.45	29.54	1001.66	741.75	1085.84	235.84	5.62
28.57	662.23	780.38	837.86	453.14	464.58	440	59.79
94.57	486.72	2371.68	781.72	463.75	400.72	683.88	53.24
155.78	1151.93	594.68	80.54	545.52	496	532.82	97.93
205.11	287.77	47.27	404	509.02	223.46	88.82	110.16
8.11	652.17	917.59	493.52	202.58	318.86	640.16	85.03
146.19	250.6	795.5	504.34	363.41	512.37	463.9	55.26
133.36	1739.95	630.08	591.82	725.02	359.75	546.34	0.11
78.15	185.43	619.27	337.08	403.69	305.13	14.75	67.05
96.61	88.16	1160.61	301.43	357.47	490.95	312.01	44.88
135.69	880.62	374.45	459.12	541.14	264.44	197.99	74.77
192.32	108.37	55.53	78.66	561.14	745.11	301.42	45.93
218.24	419.57	339.75	481.16	418.25	119.11	143.31	47.64
94.42	1627.04	231.08	255.62	386.08	103.22	579.52	73.27
171.3	1360.52	150.4	68.95	510.65	595.83	458.24	82.85
222.57	882.99	818.55	484.78	214.53	586.19	213.13	70.53
172.42	1581.06	322.8	695.39	25.44	292.19	641.14	42.75
99.15	1383.31	149.58	707.35	604.91	477.86	270.79	58.87
139.63	1910.92	232.33	693.23	241.65	287.35	433.17	53.81
188.55	268.58	750.94	334.15	220.38	607.21	402.55	56.12
63	1608.33	320.8	88.37	201.6	267.75	232.28	40.97
84.37	281.48	122.05	569.41	221.91	623.95	1517.59	60.92
93.37	449.16	1406.53	626.49	595.99	845.48	444.76	52.07
152	265.63	403.76	325.49	621.78	24.28	287.07	49.885
71.44	134.43	287.69	161.64	779.33	178.58	74.98	165.645
84.74	467.95	560.85	23.39	571.25	310	84.51	30.145
326.74	1209.87	1170.34	26.8	215.54	523.82	251.7	77.015
134.37	543.46	507.24	310.91	692	290.17	1162.9	72.585
93	527.32	1475.74	495.17	358.04	223.95	612.44	37.545
212.67	185.13	106.5	1574.32	215.23	348.4	825.19	50.095
109.68	590.97	124.13	415.02	357.85	933.17	413.61	43.145
58.61	1810.13	1538.61	48.41	294.7	552.3	266.8	64.915
69.5	253.79	492.28	634.74	987.04	409.71	296.99	87.365
95.4	687.66	841.97	277.95	942.12	288.54	565.88	42.025
128.97	180.16	104.34	183.78	472.3	518.09	419.51	87.105
5.93	1140.49	365.98	793.78	76.86	396.03	195.57	91.525
221.93	1120.15	406.6	768.26	41.78	390.28	250.04	48.995
281.65	14.04	320.35	316.57	56.23	246.63	403.57	7.645
74	202.25	1291.5	1837.12	290.82	810.26	373.04	49.805
63.15	329.45	366.63	836.66	649.04	451.12	129.5	47.515
58.54	1366.62	64.86	29.56	793.19	246.2	410.14	72.285
161.04	323.5	815.55	110.47	172.76	259.33	25.53	63.635
152.65	10.48	494.89	399.95	493.65	394.06	344.17	40.865
114.49	321.43	2028.54	49.76	70.65	272.88	245.71	75.835
122.63	1538.43	1672.95	136.11	238.9	353.2	522.82	63.275
193.04	532.65	295.33	378.79	754.44	476.79	272.29	61.725
159.49	209.32	25.8	437.98	512.4	797.58	387.16	73.905
105.83	326.71	401.44	52.8	257.7	460.28	404.02	65.975
270.56	85.93	341.04	15.42	383.53	284.38	270.13	25.925
107.24	565.71	379.49	665.69	383.39	610.2	924.7	58.835
40.58	-3.85	616.61	601.16	438.94	962.31	326.8	60.755
117.04	37.09	134.01	1019.41	657.48	420.18	616.56	51.815
130.58	493.43	769.54	490.78	346.65	438.13	354.02	86.695
214.31	1303.26	918.95	844.92	455.01	442.16	417.84	59.095
122.21	128.65	530.22	210.87	77.48	521.09	240.89	89.405
56.31	165.37	568.55	875.84	973.98	202.23	267.41	79.665
80.72	60.65	528.68	86.53	745.73	504.18	387.15	84.195
210.82	326.51	1235.98	804.76	751.33	269.85	309.98	58.525
102.85	238.03	319.08	657.27	-2.92	388.07	65.23	27.745
213.63	331.92	282.04	-7.43	304.02	336.46	350.58	67.165
150.92	781.33	503.24	854.95	412.61	354.52	498.43	88.445
135.98	126.6	740.29	183.5	435.99	2074.96	348.28	76.545
106.98	805.92	574.03	556.59	7.17	157.74	329.28	43.505
105.69	1030.6	210.54	505.53	512.53	148.57	617.12	90.025
130.69	610.38	395.23	372.8	974.5	837.74	493.13	-3.205
66.17	109.48	835.74	449.73	644.2	221.3	88.11	46.385
175.45	422.07	638.83	788.83	144.32	270.74	232.38	73.175
82.92	408.86	375.72	841.57	470.2	497.19	342.56	41.605
106.36	1332.28	498.58	143.52	104.43	44.02	220.36	66.615
125.36	1203.73	123.71	902.05	200.4	442.63	474.29	73.735
153.95	1151.69	1032.25	181.38	254.71	338.63	293.78	13.675
136.42	1444.9	968.03	204.35	314.83	429.3	237.25	124.735
122.74	82.03	794.36	479.43	500.91	630.46	198.51	63.245
176.08	41.69	1694.25	1683.34	217.02	374.74	331.73	23.445
108.87	307.88	763.92	55.51	89.66	288.41	190.52	51.125
124.75	411.15	381.2	914.06	1067.52	237.3	233.4	131.215
100.84	78.84	53.2	979.55	189.32	370.35	345.18	48.145
88.14	361.06	1012.42	21.71	275.54	378.52	280.63	64.655
106.63	479.76	363.7	199.99	393.54	420.3	300.01	51.035
182.2	224.95	208.81	661.11	516.76	304.19	244.79	4.595
100.17	181.5	271.64	800.17	216.42	462.41	739.85	57.515
59.69	466.98	906.09	875.66	458.08	222.13	553.59	24.935
229.52	305.69	388.53	364.03	300.71	717.02	329.81	65.965
182.14	436.04	486.59	275.19	669.55	336.46	366.88	65.945
45.67	215.65	635.64	694.02	614.77	600.46	769.29	44.725
67.17	247.36	410.64	228.84	377.73	-6.97	319.06	152.405
90.17	49.44	992.2	1141.66	553.98	84.65	573.31	70.055
202.08	242.31	1525.25	575.22	311.9	729.99	365.48	62.565
96.08	33.13	613.86	843.11	984.49	411.84	547.28	57.785
95.08	270.89	14.94	566.33	590.78	148.51	414.1	39.965
174.51	298.72	1082.42	205.93	523.06	312.03	402.76	87.195
135.74	649.09	41.32	396.27	1139.43	125.56	391.57	81.805
132.91	64.68	1098.66	1067.95	405.82	131.46	502.81	28.795
182	112.68	406.74	309.6	326.63	692.13	699.88	79.595
224.85	524.75	1115.6	423.81	476.36	646.13	266.86	64.145
156.54	377.52	1581.74	501.89	349.34	352.27	150	62.715
115.28	140.33	333.28	704.52	438.12	357.18	243.85	66.835
264.34	251.46	1491.92	739.97	189.18	489.36	294.82	17.835
149.05	141.94	905.64	366.1	248.66	275.9	600.28	9.605
157.69	100.46	612.46	293.58	443.04	264.86	884.23	71.305
157.58	77.84	721.55	788.74	289.72	448	562.53	94.525
166.92	235.49	686.46	702.96	937.96	132.3	632.65	-0.335
238.25	525.81	161.51	547.33	278.04	445.61	591.07	53.115
154.05	699.43	732.72	470.3	430.33	690.91	326.25	45.785
208.69	98.07	594.81	322.12	491.77	389.09	382.94	22.585
91.14	763.86	873.84	666.05	309.21	581	463.73	133.625
218.25	85.95	205.09	1379.89	534.91	420.87	480.26	43.535
139.54	872.47	753.09	623.74	303.77	-7.57	334.06	61.675
99.81	83.41	634.42	2208.24	524.7	450.17	603.33	112.305
153.03	103.5	1322.55	645.59	358.15	247.66	400.25	55.815
-7	99.91	1276.67	-12.99	364.26	791.88	314.88	34.835
196.35	651.5	446.38	391.73	323.33	75.71	287.28	76.015
121.93	1879.71	54.34	386.84	440.03	474.05	529.95	39.525
272.11	445.97	1103.04	181.79	555.66	66.42	359.29	70.735
122.55	2.39	499.23	274.07	587.69	274.3	433.45	8.775
59.26	855.08	408.84	361.12	196.54	608.55	383.14	23.775
134.21	128.48	1092.3	279.34	709.55	431.13	542.75	87.685
91.01	108.42	356.96	1055.96	302.66	371.36	484.27	37.325
176.13	26.82	467.97	33.04	354.19	426.59	499.15	66.375
128.93	155.12	429.38	732.07	467.92	284.4	935.76	106.655
188.44	529.07	574.98	375.57	325.65	607.36	577.58	24.105
161.99	106.73	59.05	480.73	181.09	313.32	334.19	7.595
167.35	77.38	861.64	543.57	764.3	224.82	933.97	153.695
178.4	61.39	402.09	835.9	472.28	314.71	267.52	64.835
63.06	402.73	944.64	786.46	446.6	581.4	1267.36	60.355
134.27	281.15	990.98	497.78	382.97	750.4	113.58	40.015
227	1688.43	492.42	109.23	311.88	-3.56	430.91	69.285
231.67	551.28	651.63	381.04	527.43	422.63	414.02	56.995
96.24	609.7	822.85	781	461.63	1096.65	118.91	55.215
5.44	469.26	613.38	499.14	235.47	502.32	323.91	56.065
162.37	413.97	840.88	364.9	411.8	240.17	343.58	132.965
173.11	247.17	312.28	584.35	562.97	74.8	78.47	62.505
133.64	125.17	516.01	110.49	892.74	502.09	270.58	45.075
104.65	284.63	812.21	548.58	378.24	432.76	183.08	67.165
129.54	231.7	387.01	168.67	606.8	528.92	310.75	102.165
184.74	491.1	189.01	1480.94	394.52	888.99	312.25	124.565
78.31	984.17	69.45	744.42	539.91	592.84	418.86	30.335
154.73	580.33	310.62	947.12	559.97	534.52	271.75	28.215
197.07	873.05	813.75	71.73	406.35	432.24	232.58	49.175
148.05	514.12	115.79	482.44	355.19	377.31	479.25	40.065
189.13	1139.16	989.81	434.57	349.02	218.79	352.58	39.215
69.53	730.5	962.42	215.23	991.63	569.03	388.36	77.795
162.32	1485.17	246.1	37.94	361.02	434.41	441.47	48.745
92.71	966.76	1271.19	631.94	411.91	193.92	522.08	30.995
176.37	2122.12	665.48	454.36	684.85	479.34	335.41	63.885
203.13	103.12	329.2	306.05	638.08	279.82	387.32	19.655
133.81	1057.63	146.27	144.17	242.8	564.76	301.56	16.905
75.06	1716.75	895.27	379.71	521.08	377.43	261.63	101.855
208.59	24.48	391.69	181.05	383.85	583.56	279.81	78.085
142.85	1241.8	1546.06	78.75	158.69	396.07	329.72	57.375
118.27	580.22	677.89	649.25	280.19	265.39	1312.72	12.215
204.39	421.22	1298.89	189.4	529.19	355.94	392.72	43.885
90.06	274.67	368.57	600.25	238.22	695.48	483.22	68.575
171.21	638.13	1758.02	89.63	900.22	62.03	102.9	28.365
133.05	1049.51	274.99	437.82	363.65	679.81	398.6	43.795
239.16	353.98	1062.18	396.83	412.17	143.07	836.51	2.135
148.06	104.9	935.28	519.2	498.36	160.81	250.82	39.325
230.45	1066.28	1081.72	272.31	67.08	465.39	210.47	38.605
291.02	1085.95	509.42	778.23	593.93	400.78	427.91	17.775
99.26	337.61	83.87	1534.53	351.31	623.26	514.73	78.395
135.93	276.54	313.65	675.27	58.89	371.92	229.56	29.655
225.43	1383.44	91.47	575.68	655.5	308.95	415.78	41.525
127.89	1901.73	639.15	1138.69	239.41	392.95	388.17	41.385
99.31	1912.19	375.22	96.97	825	368.92	1.65	50.735
166.45	185.59	425.42	1031.15	12.71	504.71	878.82	70.595
117.37	812.98	574.78	395.9	266.41	813.02	457.08	21.715
165.3	1872.79	90.92	317.15	287.11	414.47	329.95	31.545
406.54	694.05	100.4	527.04	435.06	359.44	292.17	-0.9
91.99	910.8	370.32	493.52	147.37	728.49	864.71	38.26
90.26	344.81	333.33	477.04	337.06	346.99	204.54	31.18
73.32	100.71	736.51	273.3	357.32	204.88	748.37	22.89
434.15	52.84	419.58	437.67	503.11	199.66	405.87	21.03
174.54	807.22	313.09	1727.09	95.28	325.1	389.58	26.93
205.82	184.72	628.6	567.43	310.04	473.97	49.5	35.3
107.71	632.45	1115.55	836.59	35.2	476.48	362.04	-5.82
286.99	69.22	511.93	379.12	619.49	660.66	502.72	14.74
46.65	393.11	1643.1	359.31	58.7	805.1	214.43	9.82
85.54	326.17	835.13	744.31	290.85	180.76	425.23	19.19
142.32	397.45	1408.21	246.6	346.87	556.84	343.89	26.03
260.32	433.89	839	788.9	472.26	432.26	403.04	12.49
141.46	395.92	753.31	1203.72	606.91	1034.8	348.73	27.63
59.27	900.59	288.46	860.87	436.76	159.47	637.54	8.16
117.99	530.78	1407.14	409.25	604.14	198.18	628.46	3.58
123.08	44.73	609.72	538.78	502.95	462.03	416.2	17.18
163.23	1819.26	844.47	368.28	904.34	184.62	482.71	15.04
-2.51	327.92	577.17	767.46	421.22	260.03	95.89	30.9
167.36	1097.3	635.88	672.62	371.37	234.27	179.38	-4.31
107.71	141.73	1911.04	151.16	388.19	509.94	441.56	13.75
37.32	150.87	470.45	982.12	244.11	337.58	109.86	53.08
154.11	376.23	1516.57	456.37	224.7	474.85	100.56	14.56
330.61	178.23	238.39	806.85	976.23	417.18	591.58	22.2
137.78	127.83	821.2	231.85	297.7	263.74	437.97	6.1
	14.48	447.25	125.11	223.69	540.06	136.22	27.41
248.04	506.56	712.24	457.72	103.81	449.95	390.49	21.56
67.04	802.69	1767.1	244.24	77.18	467.57	285.39	10.47
209.86	70.95	161.19	266.06	87.44	384.31	461.29	15.12
113.05	174.69	441.46	95.9	298.94	446.4	219.25	13.54
163.36	330.3	2439.88	2.13	36.64	577.2	87.95	17.67
301.62	361.69	27.66	324.77	-8.07	477.09	430.78	-0.59
303.91	-12.72	488.55	221.13	895.25	542.75	468.08	26.95
145.8	407.32	537.21	494.95	144.54	288.7	400.02	24.56
737.17	117.49	360.16	578.03	307.35	564.61	512.92	17.91
315.25	1799.24	51.6	655.07	637.16	384.13	105.37	19.73
79.13	504.11	31.05	359.66	554.62	473.26	475.66	16.58
95.62	985.36	2280.77	508.31	381.89	377.53	47.73	26.5
116.57	420.61	850.66	724.73	469.41	295.09	293.14	5.73
195.53	113.22	771.42	358.57	62.2	251.08	400.18	31.87
171.71	387.47	69.61	503.66	385.35	402.26	551.85	23.21
106.03	106.01	811.61	659.2	328.35	444.48	456.98	22.75
143.53	358.86	1.94	303.17	349.98	363.04	71.56	43.51
179.21	2530.2	1888.54	655.17	770.41	591.95	382.92	4.65
122.39	328.66	921.7	326.1	451.1	480.31	331.31	28.59
125.18	158.59	81.82	310.92	387	354.29	97.71	-1.65
193.18	498.34	748.68	546.77	711.6	366.72	473.58	17.01
85.56	497.26	1961.49	319.16	494.06	416.54	321.89	6.84
88.39	99.71	558.77	322.77	275.44	378.45	426.55	28.23
30.04	87.11	2441.75	897.94	364.49	421.82	605.46	41.64
156.22	370.59	769.46	413.55	300.36	426.13	216.14	15.2
182.69	903.28	338.89	424	184.62	196.65	165.72	14.66
183.35	449.92	1187.02	47.15	670.46	318.84	594.08	9.84
248.39	147.39	138.54	502.47	840.38	497.45	550.26	19.11
174.55	629.78	2131.4	1236.88	250.74	363.03	124.97	18.44
166.65	543.67	186.05	587.34	256.72	395.6	120.25	-5.37
168.19	126.78	180.55	368.02	441.68	593.79	392.5	6.41
98.15	547.3	761.73	357.33	466.64	560.04	370.19	-4.09
147.59	128.16	641.65	305.33	432.36	350.69	520.13	23.41
241.95	191.5	473.58	718.62	1003.97	447.75	755.75	6.54
295.49	189.47	339.26	376.97	53.48	512.94	294.58	0.47
1057	232.81	71.99	346.7	489.41	627.71	156.81	13.89
106.51	165.16	152.14	243.31	884.04	386.52	326.5	15.64
116.48	86.81	631.04	701.78	555.36	503.7	391.93	31.95
425.48	352.65	768.9	819.86	648.2	509.37	398.91	22.58
-5.16	31.88	837.29	126.64	260.8	953.15	196.03	19.15
176.42	549.35	60.17	593.53	702.27	449.98	220.15	23.27
239.42	270.45	335.27	156.6	534.19	170.37	263.3	18.72
131.26	2273.95	137.27	459.33	448.52	340.93	739.06	17.51
177.74	1306.97	2455.14	1081.23	651.43	416.26	384.08	33.78
76.51	270.91	381.44	90.1	588.25	663.04	331.82	3.97
252.13	161.3	93.33	358.82	243.08	483.26	268.18	49.33
168.95	251.2	1566.82	726	388.13	625.2	218.33	30.64
297.9	81.49	431.99	551.84	306.74	419.93	389.69	10.41
164.05	43.04	249.47	1168.14	549.58	707.15	2260.58	11.03
288.59	204.88	483.99	461.8	427.35	291.76	203.44	7.73
207.84	1778.97	213.66	218.94	403.18	536.65	474.75	4.98
139.68	93.33	482.43	485.17	652.89	145.2	503.64	15.85
164.8	22.94	505.16	551.63	119.95	645.09	248.8	26.38
198.93	483.69	315.68	295.97	982.59	473.82	381.43	18.2
112.87	127.22	510.82	545.66	141.41	385.97	259.91	33.9
123.23	414.91	353.29	769.94	266.41	33.12	530.28	15.11
133.08	646.93	50.47	290.85	1211.8	202.93	566.19	21.37
127.23	803.87	825.55	520.2	369.63	212.31	363.12	18.47
154.29	932.99	1446.56	487.58	473.51	452.83	443.46	33.32
274.02	665.75	407.82	421.45	478	715.55	412.57	13.79
99.88	805.25	471.18	223.28	421.16	203.74	571.37	6.89
163.97	1533.6	355.47	533.76	251.23	602.74	217.46	20.08
153.7	355.22	-0.13	585.92	311.39	424.17	356.6	-0.75
132.14	150.55	124.98	382.68	539.19	450.99	292.65	5.72
169.58	445.47	69.48	459.75	268.35	403.35	184.59	13.25
160.67	808.41	120.33	617.32	376.32	490.94	1550.15	12.64
146.58	1205.59	100.78	1030.99	499.37	371.12	526.77	17.77
94.12	265.42	747.65	553.28	744	772.03	445.94	-0.59
184.01	298.24	202.92	442.88	133.79	1109.26	285.72	19.18
118.29	124.7	73.27	1016.74	365.04	669.94	347.03	5.93
169.82	233.21	31.34	311.977	310.16	698.74	380.74	11.54
114.38	91.32	68.94	274.587	302.63	514.17	442.05	4.97
365.04	637.99	684.09	283.867	415.69	551.83	283.39	17.27
91.26	88.05	80.72	46.9167	553.22	427.69	250.14	16.05
78.54	333.66	23.5	455.697	264.33	231.83	158.49	19.43
70.18	193.28	234.3	1085.92	573.27	625.87	369.91	12.21
159.32	82.76	406.51	1200.37	406.94	389.47	354.08	25.35
150.75	956.34	798.625	1457.76	556.37	355.18	299.68	17.57
86.93	73.57	42.905	362.917	235.99	479.43	116.94	19.58
123.47	79.85	36.845	6.4167	555.99	702.8	737.19	13.96
212.78	468.04	31.185	277.867	415.19	661.09	499.41	-11.81
50.76	1352.21	569.075	1280.54	400.94	285.09	340.48	-4.925
84.6	200.22	56.635	664.077	298.62	609.14	256.5	4.085
196.65	861.1	559.515	446.307	457.31	587.34	362.6	-1.715
192.09	60.96	647.875	252.837	733.1	51.22	317.91	2.145
60.68	64.94	311.235	383.977	359.63	293.57	343.02	2.455
271.53	1861.67	332.585	374.887	470.67	289.88	554.77	0.885
120.7	623.76	2166.43	889.247	997.36	581.84	284.53	-3.685
84.84	262.02	58.645	273.887	171.27	535.95	230.19	-4.355
54.97	764.98	665.785	698.587	291.31	273.41	342.73	2.545
191.62	315.8	69.395	73.6767	1023.54	299.3	238.06	-4.135
89.7	234.42	268.535	212.147	426.35	443.38	576.38	-5.105
121.1	1140.89	399.205	306.847	343.15	91.41	282.72	2.975
185.91	163.72	96.575	292.937	537.46	528.11	553.27	-2.255
165.22	1186.36	98.495	74.1467	706.27	367.91	424.27	-0.355
143.22	439.55	724.555	62.6867	451.9	431.33	561.05	-5.205
91.51	288.55	2266.55	311.017	616.3	705.85	352.08	2.575
368.61	375.27	70.045	574.697	525.62	371.3	503.91	-2.505
119.72	200.51	379.825	352.937	590.56	425.67	173.98	-0.675
74.15	1501.31	22.305	332.397	3057.73	440.56	585.69	9.655
249.32	1332.23	55.635	738.627	936.29	700.78	524.59	1.725
85.65	1073.7	201.235	839.327	426.29	685.22	374.77	6.235
128	125.44	11.175	622.347	596.45	171.01	532.75	-3.625
184.46	388.22	69.225	70.1167	291.12	469.05	365.42	1.085
220.57	92.78	409.805	365.767	334.56	527.81	393.42	9.445
85.79	610.66	1213.76	102.437	383.79	371.12	325.14	2.655
133.79	377.09	336.605	559.737	562.84	446.29	398.53	11.295
64.21	402.04	784.305	381.357	4.95	491.49	7.64	-6.535
103.52	771.87	54.345	684.697	929.29	51.29	467.87	4.765
117.39	235.91	27.495	60.2167	51.57	390.79	157.81	-0.045
106.41	2543.78	180.495	67.9067	1764.95	358.23	664.81	12.045
133.67	81.76	607.185	267.977	688.62	439.39	619.81	1.045
168.71	1446.97	343.785	418.107	394.48	413.78	709.92	-2.845
208.02	183.73	573.785	461.787	551.05	444.49	265.75	-1.305
87.3	245.63	343.535	440.427	404.75	315.07	34.92	-4.515
229.81	510.33	125.475	264.427	570.19	182.97	291.09	-3.275
198.53	808.67	233.425	306.857	313.58	334.49	141.31	7.025
125.51	1082.57	824.805	39.6667	325.58	463.32	459.92	-3.395
332.17	311.22	766.585	322.247	145.12	98.67	670.42	9.205
129.24	1025.46	127.535	474.037	695.08	26.11	387.25	-7.475
88.09	1642.07	304.975	1444.71	507.47	497.11	178.25	-4.875
155.4	605.03	442.645	514.417	82.32	215.29	896.98	-9.715
523.87	229	549.475	297.917	256.69	291.7	103.98	62.595
152.72	123.85	9.695	248.807	98.62	650.88	125.59	9.565
203.82	707.62	51.145	311.437	76.14	567.4	163.64	6.745
286.87	255.91	137.985	468.977	10.51	404.29	266.25	-0.925
37.87	1123.44	145.685	719.837	731.98	371.11	561.53	8.915
36.89	227.49	253.065	940.087	302.24	259.34	424	-0.705
168.07	565.33	675.905	311.087	536.41	190.93	1183.91	-6.115
92.36	883.44	52.325	411.357	513.45	65.37	57.29	7.315
170.45	1603.99	51.055	328.027	543.33	393.84	234.38	17.235
147.01	1742.83	1009.66	65.8167	701.81	392.7	82.67	-1.085
164.17	363.99	50.555	451.267	593.15	422.09	281.36	-5.335
102.51	408.82	87.915	485.727	260.31	848.64	514.63	-7.315
350.58	736.58	330.995	779.927	474.98	791.31	211.76	-3.195
158.01	148.32	1035.49	298.077	579.5	358.29	471.86	-2.835
150.85	64.09	35.835	549.377	75.59	243.83	734.22	-0.685
137.23	633.22	622.895	595.817	45.19	465.81	171.54	-0.525
92.37	475.59	78.955	39.0867	2399.81	889.37	457.13	-2.675
141.3	85.16	218.665	353.707	268.75	454.47	587.95	-4.075
161.86	423.12	206.365	729.817	238.39	740.41	447.22	-1.705
198.41	478.6	27.215	432.217	552.27	559.84	339.76	-0.805
190.13	346.94	25.795	254.907	262.74	457.8	676.55	3.755
174.14	1080.51	328.105	389.667	1420.74	512.19	561.24	1.665
242.03	129.51	144.825	303.147	834.27	307.88	731.77	-0.575
172.98	290.94	172.195	520.047	425.44	592.66	338.16	11.565
192.27	881.6	238.475	377.827	663.13	354.33	511.46	-1.845
194.84	555.77	510.335	630.357	1829.26	376.79	504.72	29.805
171.62	462.77	135.085	668.957	1041.78	256.96	266.98	42.375
205.99	1539.65	24.555	446.437	658.02	50.06	188.59	1.965
148.34	31.31	74.145	263.167	830.9	419.04	301.72	19.365
61.9	235.81	194.265	459.847	56.98	310.87	304.03	-2.445
170.83	703.69	389.875	311.017	549.02	1413.69	206.64	0.355
159.21	291.82	192.995	463.197	404.82	311.06	434.44	0.665
285.63	931.73	1089.59	468.907	714.05	298.39	461.19	1.045
174.35	449.85	385.055	302.637	293.95	357.45	775.85	18.145
164.64	57.69	913.975	1189.18	268.44	348.2	568.1	13.105
143.32	35.27	219.475	87.6767	486.18	826.42	748.49	1.485
258.87	431.52	1049.31	443.007	576.67	288.5	581.31	53.705
161.6	239.1	70.865	361.307	420.44	684.61	71.96	-4.805
81.05	103.31	380.615	343.707	759.87	626.5	1070.73	4.775
217.07	128.58	357.515	1646.84	1863.21	628.86	173.54	-4.195
285.43	2225.85	222.325	1164.88	672.33	584.93	469.43	3.125
80.66	249.73	505.315	433.027	301.62	298.78	466.16	-1.235
138.91	112.29	504.675	402.997	232.31	527.78	254.58	4.755
154.47	477.55	127.685	561.05	662.88	379.4	865.23	-1.425
173.06	238.47	310.165	162.44	170.41	730.64	669.23	-8.775
360.23	1213.62	613.525	516.1	556.81	213.28	711.37	1.365
219.01	1557.18	114.895	689.71	354.72	411.8	300.44	-3.625
171.79	827.91	363.005	483.27	1328.27	373.76	489.37	1.465
104.7	492.02	910.995	1386.66	34.05	289.57	397.14	7.175
119.45	121.2	548.545	81.77	253.89	715.18	194.18	23.715
237.78	544.73	1196.39	475.83	224.88	249.87	269.03	-2.025
215.37	854.98	657.605	446.55	571.54	403.23	521.4	22.115
180.52	414.95	728.225	206.44	386.09	129.14	-6.34	6.335
247.3	236.23	422.105	142.89	353.45	492.59	469.62	28.815
186.63	122.29	174.965	407.13	528.91	696.38	838.74	1.615
55.74	478.84	236.365	426.04	316.357	233.3	285.77	17.655
87.63	262.43	367.435	456.32	221.917	676.2	257.24	11.275
112.63	844.67	643.605	319.59	201.577	413.65	448.7	-15.125
66.63	1102.87	1382.81	826.77	541.027	408.02	288.12	22.915
121.52	303.7	278.88	3.36	478.687	338.75	334.09	-12.845
27.4	29.07	346.49	199.53	352.917	368.42	292.64	6.035
131.2	264.94	206.1	1452.94	40.9667	340.71	486.71	2.245
161.82	258.54	232.88	254.69	285.997	498.61	436.4	-4.955
238.11	156.97	314.27	462.06	463.877	532.56	338.6	61.515
142.01	95.77	99.21	17.31	343.457	225.11	576.21	-12.925
1533.3	66.16	311.49	452.31	878.457	744.89	364.78	-12.725
84.73	978.9	146	555.48	375.977	511.6	811.68	2.015
110.35	1695.03	317.71	129.71	915.997	686.38	663.78	-1.055
195.12	305.58	69.33	22.23	387.837	240.28	265	-3.435
170.71	152.4	1122.79	456.96	293.447	216.44	432.81	16.005
517.95	553.49	32.55	178.81	617.227	275.45	268.46	19.515
159.73	200.49	269.42	493.65	712.097	619.58	210.84	6.185
191.69	597.86	36.59	330.39	279.397	356.18	828.42	6.885
192.3	159.99	351.3	623.2	211.057	317.71	387.78	4.575
89.26	301.25	323.88	27.3	572.187	511.13	487.81	9.965
124.04	255.56	1554.76	83.72	831.487	534.56	473.42	-2.255
202.43	126.01	1935.19	607.55	81.7767	172.07	521.55	3.525
155.18	1651.06	266.16	668.01	342.737	531.68	516.47	8.625
158.53	49.91	765.49	478.62	252.237	156.34	379.34	94.685
182.76	185.26	349.04	453.92	563.357	355.51	464.59	51.215
174.07	503.17	78.91	167.93	256.937	334.18	329.94	-0.745
146.88	303.96	526.85	76.65	371.767	212.68	319.97	-5.735
91.3	878.71	49.38	190.71	279.657	263.01	262.9	5.145
110.56	438.6	595.16	659.55	281.177	490.12	210.26	-11.185
172.41	400.66	28.41	611.94	492.067	854.73	782.36	41.165
132.56	289.66	92.26	456.59	245.907	281.84	327.49	8.435
141.78	660.11	822.29	14.5	151.357	236.34	559.02	92.63
-5.59	238.77	316.59	158.24	384.747	125.73	324.63	119.35
192.56	536.56	550.17	188.57	673.517	73.96	332.07	102.4
101.93	65.26	95.79	301.27	610.477	198.01	257.22	96.66
84.78	690.1	721.24	46.82	662.657	213.57	277.22	15.72
111.26	344.25	247.32	468.3	328.087	394.68	183.87	20.31
135.23	399.82	319.3	477.3	109.767	212.73	326.66	-5.47
110.97	1354.48	293.52	315.22	89.3867	371.07	184.31	107.81
29.82	675.92	730.17	682.53	314.497	497.73	208.87	75.82
225.55	833.36	1171.54	490.82	250.607	154.12	822.87	57.51
149.8	396.33	167.28	17.64	589.327	700.07	511.84	96.03
177.01	424.79	509.63	634.68	458.117	554.57	454.2	37.3
59.91	1476.6	424.61	59.56	419.787	276.09	709.64	89
80.37	875.1	347.75	662.27	451.507	411.28	388.75	107.33
80.55	2122.11	274.74	635.33	620.557	332.76	420.81	-6.68
33.66	234.52	553.83	460.67	426.187	94.28	427.52	139.63
48.87	677.45	763.12	262.63	56.4267	108.14	346.43	64.79
217.62	1820.41	245.64	260.06	271.967	387.09	216.4	44.42
148.05	427.01	1002.43	411.02	319.657	244.55	366.07	93.19
231.44	411.77	57.19	573.6	642.647	234.35	445.86	80.52
210.62	952.01	16.85	339.29	449.317	556.85	267.27	61.87
188.23	470.53	119.71	533.19	593.897	279.58	564.94	69.45
117.61	250.81	129.55	296.64	288.017	490.31	108.26	84.98
133.33	118.33	720.04	841.27	538.297	319.08	365.01	39.82
67.93	2320.59	278.15	411.31	318.977	374.54	291.51	20.56
80.07	1308.73	280.48	131.51	488.507	393.95	40.74	1.85
288.53	198.56	342.05	266.67	805.677	439.22	486.37	39.22
71.97	302.19	866.08	457.54	270.587	176.26	323.49	60.14
136.9	703.43	434.52	208.88	402.407	251.63	305.96	20.44
110.67	126.07	731.81	706.95	281.067	407.07	457.64	96.35
106.47	726.35	828.52	737.09	613.687	78.25	317.95	24.64
227.5	1113.39	245.41	1325.87	535.337	522.77	284.24	54.54
140.17	674.52	764.06	264.96	510.987	499.38	678.21	111.83
89.14	336.03	164.965	438.65	274.767	440.68	250.31	61.69
116.62	224.54	907.355	546.05	314.397	395.81	378.43	38.53
41.78	1487.68	310.015	287.27	489.537	901.77	535.29	64.64
151.49	515.28	-16.985	432.85	413.687	273.42	827.81	20.84
288.59	917.57	917.625	507.45	1638.57	373.25	398.17	14.22
186.4	1193.44	41.685	419.96	696.877	295.6	372.19	-12.17
93.56	707.07	1444.58	694.32	171.057	658.51	340.87	16.1
58.11	1468.85	6.295	552.03	376.13	105.03	475.48	108.82
102.68	40.64	146.575	605.625	403.57	427.57	575.14	-0.83
39.18	1965.46	403.125	736.845	501.24	256.02	482.99	4.71
114.93	979.37	1228.9	270.625	450.46	377.82	439.11	-3.17
144.08	1015.25	534.125	340.235	262.41	327.55	310.15	3.51
156.24	133.03	1867.72	483.455	679.02	335.78	467.25	17.74
193.88	817.84	555.965	499.845	9.85	210.02	747.69	19.39
105.21	133.85	695.725	1410.01	302.63	348.63	910.57	-20.08
80.75	135.48	1532.24	65.735	582.52	283.9	575.73	-13.54
314.54	2330.77	586.055	1019.5	1102.87	1236.13	342.96	-6.72
187.45	685.3	121.295	305.085	994.21	411.59	356.06	17.63
168.36	1637.3	147.915	897.515	981.67	215.98	50.79	-12.34
67	173.58	368.295	125.615	444.71	374.67	151.61	18.25
34.21	1222.19	586.155	675.065	571.26	197.55	580.46	-2.48
352.63	514.83	91.295	754.955	499.48	347.86	448.37	37.36
119.15	255.35	78.205	432.265	610.43	334.34	372.97	-6.68
241.06	1500.26	956.995	230.085	317.18	269.79	143.6	-1.56
203.48	903.375	269.075	1150.79	964.14	84.57	383.72	-17.21
121.04	42.145	1542.8	1585.87	574.1	1181.2	134.04	0.94
330.59	420.595	436.835	37.485	1007.14	427.61	171.7	-12.59
177.54	637.925	541.465	389.445	117.32	474.01	570.06	10.72
66.56	91.875	927.755	467.875	473.85	393.29	180.35	36.78
115.21	306.205	273.795	405.375	42.85	451.4	622.99	5.93
67.95	245.375	27.965	675.685	711.82	377.61	260.47	-12.57
1842.86	2022.76	1019.25	474.805	207.35	136.11	541.09	-9.13
102.24	254.315	87.145	56.495	571.79	184.61	266.61	-8.36
204.3	1306.54	76.255	142.115	677.59	521.15	650.92	-0.92
134.79	262.485	49.735	555.465	160.19	258.8	456.62	-0.13
84.8	291.595	1531.55	461.005	732.54	48.11	428.1	-9.06
125.72	989.595	340.365	831.755	535.01	455.87	360.51	-15.69
170.36	199.645	165.395	32.235	273.59	509.8	347.67	-8.82
80.83	751.595	51.845	1657.81	443.13	426.71	390.41	-7.5
101.97	423.425	510.465	681.595	644.74	355.29	342.32	-1.3
96.58	697.535	103.065	443.915	609.75	160	384.98	-4.61
186.02	133.145	35.685	239.425	784.64	246	551.04	7.51
68.49	99.375	83.985	586.235	697.75	451.48	410.67	3.79
149.74	451.095	619.545	130.275	821.79	620.67	298.69	30
275.57	80.395	1186.33	25.825	547.62	451.87	370.57	17.7
132.03	149.415	249.475	1049.78	1258.62	532.51	249.08	26.22
91.06	920.935	333.025	1461.94	252.39	339.37	251.95	41.59
173.99	80.835	87.415	47.115	563.18	250.71	229.87	100.88
68.63	541.935	62.235	479.865	625.24	208.99	517.61	117.02
196.58	706.025	123.855	499.865	334.94	229.81	240.21	41.18
152.56	146.995	1014.29	539.905	1296.21	411.87	205.7	103.24
155.43	107.545	920.685	536.525	493.77	274.03	295.44	45.87
146.91	2429.55	906.485	334.385	391.59	489.46	511.81	97.35
188.28	251.885	69.135	213.465	222.77	336.78	315.7	84.47
301.37	1348.14	524.805	50.045	284.44	390.6	371.45	170.18
226.92	263.225	22.715	260.625	729.58	85.17	475.54	128.84
78.23	-0.115	115.605	242.395	331.81	218.11	282.03	62.38
166.74	229.065	259.565	426.735	582.8	161.35	330.8	98.96
222.98	165.445	202.925	485.765	346.19	354.9	149.185	91.96
120.74	568.145	747.685	505.605	661.03	338.42	100.415	85.41
131.66	75.395	538.905	495.335	555.2	258.78	413.745	111.09
117.3	87.235	299.195	348.465	443.45	398.46	391.855	85.81
146.94	1471.39	440.135	410.405	278.01	343.1	207.635	35.75
262.14	637.815	793.805	372.185	404.1	475.27	233.575	122.49
223.26	403.545	345.295	436.145	979.41	677.54	511.745	56.02
208.91	58.505	461.255	270.425	389.61	232.57	357.025	32.03
164.06	156.465	487.295	352.775	557.08	426.48	61.965	36.65
168.91	97.465	773.315	312.045	584.66	128.18	455.635	71.19
150.87	373.085	551.145	326.065	306.67	199.87	307.185	81.12
124.21	2422.8	1649.28	309.465	395.52	255.07	122.025	89.12
252.6	422.685	1128.77	679.435	462.59	509.09	750.025	90.26
46.36	1249.64	298.145	680.335	365.9	224.12	388.965	109.61
110.7	676.275	796.545	369.505	508.11	206.39	292.965	84.95
144.4	112.875	347.915	1396.57	558.75	327.06	470.465	34.425
80.68	115.055	534.225	104.675	467.99	27.53	344.635	29.315
168.49	1817.28	415.485	552.835	585.255	443.53	357.075	19.495
178.79	1525.32	228.515	343.875	720.205	202.58	36.525	45.925
161.3	257.905	1767.11	259.105	872.925	441.48	258.685	30.945
175.9	351.105	362.335	185.485	1127.42	289.85	319.245	75.155
92.9	1852.99	502.145	1094.16	315.535	402.69	141.245	24.885
288.88	98.675	406.185	560.695	425.315	503.44	133.965	50.825
199.18	167.105	454.435	1265.88	286.815	112.28	182.795	95.005
109.22	333.315	1636.27	384.915	433.425	246.63	460.235	73.135
174.34	72.345	811.985	-1.605	489.645	294.17	431.565	47.165
70.95	370.075	636.515	239.175	396.035	255.51	294.265	33.335
99.45	1378.45	351.195	73.435	261.815	119.36	220.035	8.075
159.45	2153.55	910.655	369.625	1143.7	318.54	369.035	55.125
265.22	150.485	326.435	753.175	352.425	342.61	134.765	41.695
197.32	581.745	1174.43	1730.08	619.245	430.02	158.855	52.225
148.87	68.215	611.125	205.155	48.635	412.81	266.535	52.225
409.48	274.245	445.125	622.185	493.265	391.21	337.375	50.775
117.37	539.925	362.565	794.825	884.995	234.81	241.685	75.495
221.16	114.545	222.735	1524.66	713.685	408.7	373.555	83.965
202.13	49.865	414.575	39.455	1106.34	417.55	675.985	35.195
130.99	620.575	103.575	14.665	201.685	206.18	175.285	43.315
139.25	527.605	434.805	236.335	662.815	313.07	171.595	69.725
114.03	2377.34	402.075	61.015	484.655	362.17	442.815	68.795
145.12	87.025	512.275	258.545	389.895	248.76	560.725	70.395
71.1	710.005	191.795	64.545	387.195	345.02	212.155	52.215
126.61	1241.22	1564.62	592.115	350.545	614.12	168.285	8.775
221.71	984.375	1190.59	615.905	1168.28	670.08	238.595	34.505
118.04	59.625	399.215	469.505	181.465	302.1	204.285	91.695
145.72	1333.85	1892.84	1629.37	525.035	375.53	227.115	104.065
163.7	324.925	624.295	280.315	562.495	354.8	181.685	90.195
207.06	2138.07	306.915	405.845	338.365	254.94	387.115	95.075
117.99	405.435	643.705	393.825	64.405	417.48	676.565	93.435
110.53	13.375	123.915	311.535	420.715	240.43	697.275	54.725
127.79	743.445	1031.36	543.745	69.415	770.64	131.935	62.055
275.24	304.725	330.585	1588.89	391.695	828.43	361.565	57.005
110.43	338.875	601.145	709.195	249.265	267.18	359.775	55.965
98.84	1298.93	761.665	543.905	345.815	293.73	459.705	104.105
131.57	437.145	492.775	480.675	46.725	222.17	280.505	53.995
122.89	131.885	253.375	561.565	445.255	158.44	156.935	90.51
142.24	333.205	628.415	409.305	436.545	273.72	266.435	32.63
181.51	867.565	1488.69	340.525	706.455	342.61	577.045	76.78
122.2	84.755	48.005	503.725	314.315	295.54	724.205	108.48
145.21	157.845	1248.41	395.455	684.135	301.45	664.435	55.175
225.52	160.375	604.345	244.025	628.495	249.88	144.545	10.245
100.46	1234.99	595.655	579.825	442.495	218.64	278.735	38.285
112.78	90.425	110.295	261.755	347.545	305.53	545.355	64.225
152.95	888.315	48.785	498.945	304.425	275.56	121.815	-7.045
340.49	247.505	480.565	311.295	568.865	149.19	815.745	39.335
136.15	170.585	456.885	658.675	1109.12	360.87	212.375	69.895
56.43	156.055	520.465	412.565	256.415	381.93	334.665	107.225
160.21	391.925	597.845	480.205	301.215	214.15	396.105	110.645
172.88	1194.16	344.955	288.995	288.405	264.91	25.815	51.985
104.32	283.025	48.065	312.18	1165.38	302.74	239.995	66.545
182.88	1085.83	502.095	249.73	592.165	313.65	664.755	61.865
224.88	918.765	46.215	574.01	267.285	550.84	222.335	89.375
111.27	312.055	355.855	194.34	640.075	210.3	48.055	36.975
137.71	403.055	56.375	510.4	313.295	434.98	423.565	37.475
126.1	198.265	110.995	418.57	257.675	477.79	278.825	63.345
88.82	674.365	845.265	632.29	740.105	249.38	228.825	85.925
264.49	406.785	504.885	385.62	322.555	786.367	290.205	60.225
485.77	1277.59	319.855	599.4	363.775	157.487	197.825	24.775
152.82	846.705	391.195	0.07	671.545	326.647	527.275	62.33
76.32	948.155	75.665	518.88	599.955	438.037	363.595	12.43
136.71	378.635	43.005	27.88	397.865	262.097	302.015	54.57
109.14	2318.07	540.565	95.45	355.045	609.367	218.165	35.69
189.85	201.945	534.055	467.45	441.125	960.927	597.405	68.2
113.38	799.075	561.285	52.59	218.845	425.257	1113.04	8.475
78.38	1321.74	1025.14	220.17	859.865	795.927	290.355	11.645
161.3	307.225	374.765	231.05	830.985	139.927	65.445	0.725
420.3	132.885	819.245	299.53	722.055	1462.32	374.945	34.285
505.85	75.525	629.535	887.49	683.525	187.207	296.475	8.065
216.76	1229.62	574.705	79.7	376.065	407.867	88.175	13.205
194.48	379.055	573.825	598.49	503.845	522.367	336.715	10.375
169.07	341.295	360.075	425.23	463.325	254.597	150.685	33.535
248.6	110.355	265.535	417.75	285.875	19.2567	1011.75
127.36	741.855	622.985	405.36	316.755	1020.43	196.295
121.71	800.525	645.695	362.86	745.535	1129.37	276.775
126.06	1375.84	587.135	78.82	-6.405	259.877	357.235
227.67	508.585	275.175	278.28	702.705	221.447	427.535
88.01	461.385	220.825	460.13	532.485	216.687	304.095
285.36	554.495	226.785	503.52	500.485	88.1567	254.045
173.32	203.715	359.505	487.9	315.925	282.567	427.315
80.04	424.055	245.275	322.03	202.095	197.707	45.495
127.34	396.215	370.655	244.21	675.035	418.057	502.345
126.46	854.895	1619.74	1062.36	517.205	404.017	695.035
227.04	1011.89	882.235	677.33	52.705	219.837	373.345
34.38	1392.55	387.885	679.4	152.425	2.4267	291.955
133.67	276.965	667.155	714.09	541.485	212.847	317.835
147.09	666.625	2020.57	347.81	382.815	208.007	428.875
72.34	1480.62	381.935	152.13	2.145	579.927	410.985
145.09	396.155	349.065	1116.53	302.335	777.887	619.855
204.75	131.655	389.115	327.08	763.595	677.137	343.635
110.23	900.295	660.525	415.46	225.515	333.807	304.395
164.12	542.705	777.025	49.37	273.645	538.617	469.655
106.08	870.105	482.395	209.4	288.335	143.507	189.095
220.04	413.835	348.12	1371.7	289.685	476.117	473.335
66.41	526.955	1131.07	368.64	607.645	366.927	503.685
226.82	342.305	1152.57	74.85	342.595	235.387	41.375
123.75	792.215	268.29	540.43	424.465	119.197	298.525
160.27	793.205	306.07	450.49	300.815	159.737	184.945
229.15	550.405	642.01	451.09	493.105	363.077	732.325
115.6	166.495	836.8	160.59	684.735	423.287	400.765
149.53	413.715	837.04	330.15	276.655	308.927	545.695
43.71	166.325	314.08	371.87	500.775	208.307	268.525
59.64	615.495	197.28	234.04	439.665	562.927	490.525
86.67	73.995	875.96	612.23	603.695	45.8967	213.385
190.46	79.105	679.18	342.97	246.225	816.187	641.565
58.33	62.935	1014.05	362.19	518.965	503.987	400.895
180.09	33.495	316.66	336.61	246.605	219.697	427.355
168.74	56.775	55.44	1177.81	605.355	94.3467	510.665
139.68	29.385	99.4	563.72	2017.17	318.747	390.895
96.44	4.545	349.14	462.42	518.025	906.077	277.095
128.01	1187.33	1121.06	701.81	388.155	244.307	132.135
141.14	284.275	591.76	502.78	64.335	265.807	284.595
230.74	23.785	785.1	443.4	439.295	160.387	453.515
94.1	473.545	843.3	479.61	324.715	220.507	429.935
216.29	317.355	1332.91	282.58	572.155	564.507	30.045
114.48	440.175	130.87	545.16	565.435	380.427	340.455
156.84	155.925	842.92	287.29	745.115	625.647	406.295
115.23	605.385	625.7	510.23	395.105	259.387	378.505
182.61	754.675	633.66	563.14	365.535	353.927	89.175
101.52	102.675	39.04	484.21	503.285	511.477	306.625
154.23	173.255	124.89	88.78	350.485	323.727	431.975
115.61	353.295	691.89	491.86	73.965	279.007	514.705
117.29	329.755	871.54	446	271.345	344.827	338.375
38.1	-4.055	311.32	644.12	675.125	354.157	386.905
342.61	370.995	315.97	499.14	356.005	768.467	375.915
280.16	175.845	108.77	606.23	342.385	205.807	488.805
244.16	434.405	635.25	399.24	278.845	216.027	306.595
76.39	14.145	330.71	478.32	236.785	325.197	335.115
118.46	285.885	781.51	1190.93	398.635	196.187	433.315
162.02	1413.43	254.02	291.33	412.865	886.367	234.795
338.12	347.505	1087.41	899.32	516.075	196.907	273.695
246.89	358.895	48.63	475.44	380.435	242.877	594.275
94.89	64.965	2626.41	213.515	507.255	259.337	654.545
264.32	1151.39	268.34	1070.9	182.535	385.107	272.345
130.68	1155.21	805.37	525.625	522.205	609.747	257.205
179.29	140.255	610.18	477.625	156.135	30.2967	227.585
122.98	119.385	139.24	1209.68	634.305	680.797	328.825
111.92	55.045	306.56	89.625	101.255	654.357	249.905
226.83	9.645	1120.35	343.515	484.705	293.907	586.245
191.25	309.985	1105.71	1008.62	164.205	180.967	422.645
167.04	108.845	57.35	254.905	333.335	692.967	288.245
172.9	96.715	443.64	276.515	272.975	386.527	554.365
101.38	434.045	36.4	232.405	245.215	494.147	132.815
211.43	66.655	862.98	510.455	1048.88	657.687	303.705
411.54	37.055	497.51	50.585	330.775	217.927	551.215
191.82	265.155	1047.74	377.115	252.905	319.627	461.595
127.1	26.035	1452.73	279.835	674.795	279.747	392.425
107.54	24.335	445.51	746.965	160.685	802.337	318.825
208.32	127.975	296.63	355.015	644.395	210.197	220.005
243.4	97.095	992.01	594.285	373.475	693.247	293.445
193.65	58.335	544.06	411.195	841.325	198.327	522.345
96.85	437.945	451.76	310.795	1225.28	210.287	364.895
170.82	282.935	534.97	493.275	496.795	319.217	284.345
162.93	10.215	599.7	851.105	219.885	225.607	418.525
150.63	458.425	990.25	38.145	512.665	371.607	432.325
113.97	293.365	397.2	53.275	495.105	378.047	294.695
193.56	265.275	1603.14	284.625	188.415	307.757	415.235
141.61	129.965	122.86	728.535	366.505	523.537	404.665
131.79	477.325	210.75	269.215	214.945	591.147	393.065
199.63	185.825	246.7	51.095	374.215	459.077	372.695
27.66	809.025	569.42	145.395	403.505	362.907	282.525
246.44	217.675	801.08	48.975	215.025	243.777	267.415
175.36	343.215	405.7	339.975	220.635	219.737	195.975
77.86	102.365	86.47	700.555	476.675	606.537	323.865
204.42	547.655	83.81	76.245	318.275	359.987	315.365
154.76	71.945	135.36	242.385	428.315	429.887	642.755
173.52	239.545	942.64	88.125	198.135	171.207	163.365
43.76	374.345	719.81	345.495	239.285	357.807	286.975
85.13	208.765	685.32	209.425	274.265	250.507	279.415
169.69	648.015	1353.37	76.945	566.965	357.007	682.255
60.57	308.115	866.5	76.205	252.045	460.907	547.135
159.73	114.875	546.1	171.055	228.175	478.357	882.025
56.62	208.595	1065.92	76.205	309.335	353.797	258.975
231.13	516.025	639.84	1820.12	472.175	411.757	196.365
92.91	441.585	509.39	535.405	403.395	315.547	114.755
127.78	219.545	817.77	569.495	445.165	607.807	151.865
149.37	1993.12	175.38	151.915	378.365	120.045	512.475
151.19	1204.68	387.56	41.385	541.705	183.765	1191.81
187.82	143.875	399.95	937.665	578.53	658.985	365.755
148.21	270.985	62.95	78.625	389.53	372.375	323.755
91	33.785	575.03	62.395	182.36	340.265	702.525
65.91	210.395	614.32	373.515	80.2	622.045	615.865
125.35	54.165	295.82	420.355	26.03	480.765	410.195
140.99	80.755	650.39	404.425	131.7	43.155	585.415
121.8	151.035	73.43	299.015	179.42	468.485	321.935
35.97	435.915	628.24	1120.13	1128.2	8.155	445.265
192.21	587.585	732.9	617.865	182.75	-9.625	285.215
225.84	956.505	636	81.435	240.53	228.265	375.455
220.69	272.675	510.66	282.925	680.64	421.325	549.405
91.49	279.405	519.79	547.195	1027.81	285.655	857.935
151.2	636.885	105.79	487.575	377.53	605.155	336.175
176.38	262.22	533.3	326.795	691.81	482.435	214.875
90.85	48.77	508.64	39.645	17.48	274.375	500.145
120.12	986.55	341.52	218.835	1064.39	195.545	207.285
87.95	326.83	806.48	61.165	20.58	562.875	211.605
106.02	409.38	224.08	449.245	606.89	174.715	218.745
241	553.98	326.88	274.615	468.98	271.325	146.465
150.27	127.17	45.96	1013.66	419.57	258.765	341.465
118	591.46	1285.82	298.725	49.36	456.665	245.655
85.22	319	914.23	745.505	133.7	571.285	259.395
196.41	1146.03	323.68	14.275	338.49	593.405	145.915
135.13	74.42	773.14	313.515	610.53	542.365	159.785
112.43	51.33	62.91	1400.64	-9.59	420.595	268.525
132.71	169.03	240.5	57.415	884.44	452.405	384.395
145.48	106.64	1098.03	482.335	861.49	395.865	37.695
102.78	302.25	90.95	495.485	361.27	202.455	507.435
477.23	109.9	290.06	79.925	30.94	603.815	138.435
91.98	54.42	305.88	416.345	65.42	451.865	325.175
400.76	26.26	637.37	384.865	485.42	442.875	353.735
173.09	451.51	39.91	47.215	90.24	571.875	546.915
131.51	196.63	1411.81	980.965	461.92	762.615	386.525
143.32	69.15	286.09	472.355	40.53	452.955	247.825
217.12	211.59	286.97	540.555	400.39	558.745	6.475
147.6	198.05	882.72	679.335	291.5	142.045	338.235
175.2	726.86	287.21	1243.59	825.7	-3.735	272.945
49.25	278.7	223.14	284.805	227.12	266.615	204.075
152.91	230.09	158.3	437.695	364.15	343.525	283.695
147.28	56.93	679.21	425.865	389.19	122.565	266.525
457.36	756.3	609.12	366.615	154	781.715	292.905
116.74	170.55	279.31	440.015	652.82	208.965	382.615
120.48	348.97	448.49	592.855	39.24	243.835	381.115
102.69	204.62	319.92	385.445	461.98	55.965	477.155
108.47	905.62	531.76	588.235	63.26	308.005	252.655
111.68	792.02	543.69	505.415	256.2	790.125	201.655
88.38	40.22	757.14	421.165	55.82	806.425	267.505
124.88	355.61	680.02	554.865	605.85	1236.84	312.005
203.29	371.32	252.14	492.385	242.96	567.695	433.285
139.49	401.39	287.41	330.685	296.47	321.045	397.955
299.04	33.71	1042.17	514.165	774.95	649.465	589.585
183.39	1208.96	356.84	234.655	493.11	929.315	90.065
183.71	346.21	360.4	611.205	61.78	390.235	872.175
136.98	514.49	1247.69	687.585	69	692.355	158.905
132.88	324.19	1767.49	533.475	492.99	251.635	389.905
336.45	784.91	824.1	207.435	414.31	486.485	248.195
162.48	242.76	470.99	223.615	363.32	487.825	93.805
111.13	52.46	813.32	829.335	678.1	239.195	361.035
162.13	35.4	46.04	679.085	535.03	423.295	497.905
276.4	201.79	448.49	396.385	541.39	425.505	312.105
272.26	-14.8	1558.59	1316.26	360.13	794.765	256.355
135.21	62.9	2484.5	755.215	182.97	149.325	40.145
120.3	177.98	1151.31	425.52	320.27	250.575	83.925
128.28	676.44	348.71	710.96	516.33	496.215	369.795
240.86	210.37	842.51	501.63	428.96	24.105	329.305
148.43	537.18	98.73	794.35	273.55	217.205	154.535
131.78	501.18	50.17	1298.57	910.59	415.305	234.955
230.72	343.5	78.75	690.52	332.15	215.755	194.415
86	297.11	470.5	680.57	265.26	274.605	114.375
148.22	246.88	129.25	145.74	712.11	340.565	228.635
206.16	511.57	803.98	586.74	574.72	242.985	534.225
185.61	450.75	1518.86	22.91	393.4	362.495	312.635
83.55	1289.93	1451.9	861.14	270.85	694.725	639.775
208.5	615.45	440.38	41.21	304.7	159.545	361.225
137.88	224.16	62.28	432.62	518.93	731.635	97.345
131.56	272.24	1609.85	157.3	368.75	376.935	466.315
65.56	1135.95	712.78	477.13	359.84	229.845	112.745
139.04	149.68	596.89	944.57	394.09	482.135	133.165
182.08	176.9	1453.28	339.57	442.42	489.955	432.275
158.23	320.85	146.07	42.92	285.62	202.375	232.245
70.46	481.87	49	706.83	438.26	273.185	548.515
373.13	41.67	812.71	21.18	578.47	240.855	299.025
125.61	257.66	512.04	32.93	328.67	515.425	364.525
	254.75	1720.11	354.85	991.02	292.775	338.495
67.24	157.5	466.5	28.04	295.9	465.575	255.035
338.29	240.41	730.24	61.47	208.5	617.865	679.895
147.03	253.63	371.27	100.31	823.66	113.915	192.245
150.07	454.34	640.12	697.77	258.23	343.175	335.815
155.81	844.6	207.79	863.97	402.89	422.175	503.715
592.42	93.81	1010.18	599.85	597.9	498.865	244.395
45.69	139.09	155.35	146.09	419.6	214.195	352.115
85.61	1197.13	905.13	563.05	658.94	449.365	447.945
101.15	952.48	42.99	464.09	757.89	730.405	388.195
216.27	849.77	474.26	172.5	412.82	351.085	417.625
53.86	128.51	676.68	532.53	752.93	168.255	367.335
84.52	483.16	354.47	92.39	621.98	284.155	82.075
154.79	157.78	39.44	630.71	758.64	306.495	441.995
155.02	296.28	878.68	74.92	415.49	470.985	586.025
114.75	157.785	618.02	370.39	658.72	340.985	137.575
108.01	492.205	749.47	414.53	1191.28	328.935	194.465
105.79	785.815	488.58	1019.14	349.005	810.615	185.675
74.42	758.095	209.94	744.83	449.945	229.005	462.935
120.83	1043.82	2005.89	290.11	329.055	513.245	296.275
105.5	412.535	148.04	893.58	66.555	364.675	553.975
179.64	629.315	688.1	529.05	630.165	582.795	401.325
285.37	448.595	238.52	815.26	469.005	307.435	319.045
401.12	308.315	151.25	66.59	474.615	394.515	182.235
124.12	199.145	634.7	304.41	554.895	450.325	300.885
107.01	452.965	935.13	28.87	489.505	733.795	326.065
83.76	315.435	1135.07	68.64	528.775	415.795	418.255
74.98	99.725	260.02	126.61	1434.01	439.105	199.345
89.19	780.775	1463.83	577.41	331.165	335.785	264.575
96.08	1.725	1006.4	578.62	426.165	1238.35	217.395
88.87	274.595	1353.45	246.05	515.945	534.885	400.375
223.53	349.815	1772.05	642.87	42.335	665.175	360.785
127.56	1015.12	107.98	84.3	463.945	387.295	1469.71
343.22	1218.24	584.08	1009.03	380.555	392.275	627.225
198.01	290.625	261.02	659.94	679.275	642.195	155.485
92.71	2721.99	394.22	741.14	503.055	325.525	239.355
42.11	325.455	1998.09	475.28	273.125	687.095	338.695
96.64	101.785	89.25	523.85	813.595	420.425	456.205
74.04	1160.62	218.55	377.99	316.125	445.825	173.385
259.94	1211.09	822.59	373.42	543.735	420.855	367.575
78.62	712.825	30.19	560.31	717.315	598.605	523.265
126.52	127.325	98.08	685.61	743.075	578.305	621.855
160.46	377.475	126.08	400.89	39.605	484.985	152.995
200.39	46.905	248.69	514.08	407.015	473.135	553.115
136.26	69.915	123.97	547.31	759.285	427.28	356.075
265.91	432.565	409.86	1073.98	1489.65	314.22	475.915
83.17	212.525	353.86	369.78	109.745	478.22	470.705
63.46	259.515	232.69	1649.72	337.005	372.72	461.145
82.91	237.005	31.43	285.25	487.575	188.67	412.435
67	283.235	51.85	268.89	374.875	311.17	346.815
92.63	227.555	141.93	379.88	319.615	440.17	316.425
150.82	840.305	297.95	688.79	620.315	28.61	247.805
65.94	83.975	519.75	723.73	479.705	458.11	163.545
94.07	1099.39	78.12	327.38	381.445	375.17	188.775
153.07	935.865	442.7	464.09	860.565	385.33	263.89
501.22	108.475	709.89	532.59	289.565	315.83	349.28
23.52	72.175	926.78	571.02	565.025	468.11	61.34
170.42	355.825	50.83	735.26	1143.22	200.67	335.73
163.09	1328.7	136.92	615.23	379.835	541.33	251.39
148.12	33.965	305.95	567.8	568.375	210.11	20.67
93.33	1087.61	494.66	1052.4	367.155	628.78	113.39
153.65	99.715	882.17	713.49	530.385	602.56	354.01
72.53	239.435	511.8	920.8	1218.9	544.61	267.56
149	71.175	216.63	419.9	914.135	634.22	92.67
112.18	96.765	81.09	500.04	270.865	939.67	159.02
102	1554.82	731.85	521.92	717.025	307.78	26.74
151.32	55.075	98.96	350.27	363.185	761.5	533
117	67.775	550.45	803.84	175.425	842.06	29.86
244.79	728.575	449.38	1044.06	109.595	60.94	565
189.08	184.545	365.72	650.09	696.075	540.22	192.81
103.66	176.275	257.27	712.66	45.255	374.65	159.77
172.22	67.185	575.81	919.94	287.955	404.53	531.23
34.05	1318.82	121.2	522.42	140.445	645.3	379.23
149.94	103.565	325.47	518.93	411.275	648.94	323.49
119	977.735	275.38	296.97	871.305	125.94	221.7
85.75	305.265	217.3	667.97	499.475	294.71	459.95
65.88	21.955	527.14	580.75	351.645	483.03	188.41
124.83	706.625	588.47	356.36	265.885	723.32	487.69
155.38	763.205	363.42	97.14	142.755	571.93	126.87
407.89	174.255	133.465	423.58	219.175	357.15	325.26
327.64	581.875	24.195	380.08	389.945	752.85	382.76
109.26	304.125	11.305	756.97	380.415	642.6	298.83
200.56	148.135	99.195	47.31	354.205	597.89	330.72
147.99	1821.65	353.575	906.14	383.755	837.85	203.76
95.26	705.465	343.855	28.86	313.095	660.72	558.8
156.91	591.755	790.305	308.64	322.605	854.62	23.82
160.65	194.815	356.745	57.53	18.865	1271.58	141.93
128.7	67.195	424.845	856.08	291.755	386.81	237.67
157.4	669.085	200.085	668.64	143.685	313.24	400.52
207.15	158.755	263.965	770.42	465.815	359.54	390.34
163.63	551.365	106.745	447.86	348.695	42.37	7.01
161.22	268.085	515.265	404.97	485.815	723.96	460.23
192.11	96.195	482.765	1497.97	237.995	253.41	318.91
217.14	368.085	27.345	358.26	763.725	574.46	274.34
14.84	788.755	250.715	921.02	301.165	541.21	390.66
142.99	320.235	26.265	717.46	485.145	387.39	440.79
137.12	381.655	155.525	30.46	387.135	660.85	539.38
125.33	260.235	75.425	259.73	212.575	836.02	583
88.84	389.275	492.875	905.09	320.725	520.66	312.21
125.94	253.615	488.105	61.21	494.135	551.11	67
206.5	76.485	43.695	672.16	219.915	12.47	45.26
783.09	658.665	279.565	29.68	859.365	746.28	150.82
299.79	318.105	381.925	453.34	283.405	558.83	469.61
99.62	174.405	371.575	1052.64	183.695	353.57	580.73
347.8	300.255	828.775	793.06	169.055	537.15	610.08
149.94	224.215	42.335	501.6	307.555	496.92	58.42
97.66	216.335	374.995	307.91	386.295	137.8	385.54
145.82	62.985	880.315	81.76	203.425	332.53	27.09
138.08	499.405	60.025	806.1	387.585	192.47	257.54
166.74	816.835	344.895	313.53	300.785	563.42	228.73
262.71	329.525	187.155	192.34	340.455	509.86	958.56
187.99	81.525	7.005	1470.53	341.025	427.7	481.48
66.14	429.685	134.265	56.39	312.625	402.81	219.27
239.39	1224.06	674.495	292.6	78.955	430.13	523.37
79.69	306.945	861.035	597.95	236.285	951.6	267.9
195.7	375.825	533.565	350.74	472.105	346.76	923.01
126.83	1003.97	1057.46	300.57	429.775	531.19	418.86
116.47	69.085	401.175	721.09	530.435	391.29	172.16
114.37	61.685	242.115	396.85	483.915	269.6	211.43
168.23	393.685	1105.46	262.03	563.605	369.41	363.78
244.19	316.655	154.515	417.51	586.825	652.08	70.95
77.88	288.755	365.765	72.58	312.905	547.51	276
122.38	250.565	340.705	771.22	330.965	394.4	152.28
163.65	228.915	179.205	73.42	450.175	717.89	149.75
217.65	99.945	274.415	562.7	348.835	396.69	361.36
137.86	243.205	360.415	341.08	415.615	483.56	368
121.52	586.875	191.705	366.52	311.485	353.98	305.52
129.9	79.395	327.055	623.05	291.825	364.82	257.65
258.92	893.455	390.405	539.82	500.435	1063.74	381.8
105.32	245.395	1450.53	559.43	445.545	540.35	559.17
132.24	541.375	258.845	249.21	727.205	369.7	344.41
217.07	743.815	377.295	17.58	290.655	1232.06	195.25
155.05	127.065	574.455	409.82	564.375	693.91	24.79
112.22	149.065	272.235	86.33	478.155	273.56	273.72
57.55	43.435	258.475	520.25	86.595	387.22	328.33
162.25	22.125	374.865	497.22	535.265	405.36	441.54
268.63	811.515	132.335	136.26	85.485	839.03	615.25
172.78	397.575	193.755	16.19	528.545	429.16	169.38
87.73	271.625	305.805	469.69	407.705	188.18	324.64
207.61	136.285	142.595	1907.54	984.545	684.87	328.59
131.92	1311.19	523.595	533.12	838.045	298.08	306.3
155.85	361.425	1193.23	352.69	378.825	617.15	379.55
283.28	1204.67	657.78	559.87	876.325	768.78	279.14
78.31	306.315	856.03	550	844.595	385.45	146.2
222.19	125.245	371.95	2017.6	439.825	481.82	183.32
199.76	157.565	252.76	585.81	29.365	443.85	346.91
118.73	257.685	630.6	380.81	583.555	503.08	353.87
123.74	790.055	1161.02	76.64	-4.975	678.8	395.15
107.45	631.845	368.54	589.6	314.645	662.34	269.92
183.38	117.665	207.4	409.78	523.405	933.92	356.39
188.75	92.025	523.92	625.06	965.265	223.36	241.16
155.82	317.155	619.1	587.28	994.945	715.01	432.84
	619.145	316.59	692.54	620.135	560.33	326.58
63.58	81.175	749.71	466.5	627.565	212.43	538.975
133.79	762.345	380.16	514.29	537.135	186.73	122.415
212.22	88.615	1067.23	1202.41	33.175	288.72	383.915
153.85	75.275	344.39	567.21	566.055	567.39	48.525
134.12	2902.53	484.97	497.26	593.305	481.78	337.475
255.41	162.505	343.35	504.66	563.515	21.94	386.365
157.12	1254.38	519.58	74.97	514.555	602.52	188.085
165.66	639.405	609.84	345.18	472.435	1158.3	417.915
174.53	454.545	727.91	395.2	910.475	365.04	498.865
197.55	345.045	198.57	439	761.185	681.55	274.805
142.77	172.475	527.67	867.46	69.645	1156.87	843.135
219.78	770.085	204.78	390.86	240.305	308.63	2129.24
125.14	614.165	4.08	532.99	417.035	380.11	98.635
135.34	174.805	31.21	458.81	452.305	406.91	536.195
115.07	404.605	438.52	502.25	536.535	465.2	579.365
76.12	401.485	458.27	332.1	122.845	391.43	196.135
117.95	566.985	183.55	52.34	11.225	352.05	386.305
142.51	960.865	165.05	525.78	497.705	1354.2	384.135
179.23	479.255	285.08	538.29	586.335	507.61	430.635
173.18	218.055	240.43	217.59	741.075	31.06	22.585
175.4	168.245	650	690.38	455.375	493.89	11.245
57.18	29.265	629.23	654.71	53.115	560	320.975
133.12	204.615	641.23	246	794.225	411.22	393.915
249.95	272.155	191.9	588.4	475.075	351	311.865
35.23	41.07	252.07	422.32	511.405	210.78	748.475
206.57	671.96	304.65	328.92	278.155	664.39	855.695
141.34	70.29	701.91	773.17	40.155	264.94	540.805
238.07	144.12	467.58	994.63	102.515	499.72	718.635
161.51	320.07	811.67	449.38	166.765	216.17	290.475
137.58	104.46	491.24	728.28	456.945	457.72	308.085
203.4	380.79	858.46	536.07	604.505	3.61	447.135
52.45	1318.46	88	448.76	44.235	356.28	458.805
92.07	149.79	1068.22	460.9	755.715	35	561.025
76.34	-3.88	130.72	474.34	356.715	-15	436.415
5.79	93.12	1.61	741.86	52.035	319.06	304.195
122.12	274.12	-6.84	901.75	996.595	173.44	434.415
296.01	623.79	162.44	655.24	14.685	246.94	635.195
167.58	265.73	140.55	472.01	27.005	-10.06	395.915
76.01	316.85	800	1220.04	947.395	323.89	347.695
121.15	471	97.47	423.975	811.495	282.61	333.245
78.91	1184.24	149.09	292.705	719.815	202.11	510.665
188.49	1342.39	48.28	223.535	580.175	562	292.305
37.53	272.52	18.74	60.755	57.945	255	149.205
373.25	236.79	221.38	744.365	587.555	541.12	332.495
303.2	148.25	13.5	390.865	322.875	420.93	211.065
175.44	221.16	276.2	221.645	742.235	461.74	301.825
205.49	357.68	103.16	579.815	1011.33	494.64	65.875
150.87	211.03	61.52	558.315	947.125	275.55	301.735
262.96	184.07	569.14	509.475	836.345	1028.36	335.395
327.83	557.42	659.64	427.645	566.125	422.59	399.395
252.1	64.2	393.14	553.365	635.425	454.24	399.445
176.87	1567.99	205.49	198.275	651.075	250.72	507.165
96.6	259.55	440.38	13.465	542.655	744.76	423.805
94.66	933.54	317.38	93.855	804.845	86.76	256.075
90.1	73	309.05	867.085	750.015	381.02	476.805
157.84	160.75	531.99	395.555	385.215	244.11	500.565
144.27	42.17	373.44	480.515	238.765	279.85	697.305
170.84	679.41	140.39	497.735	1152.47	351.63	325.695
135.23	391.71	134.22	29.645	762.855	418.24	-0.265
40.68	607.25	32.08	313.945	425.735	263.15	369.825
225.34	390.99	608.71	873.945	1095.19	228.28	331.435
165.8	186.33	147.84	49.865	315.335	16.2	115.265
192.84	569.51	162.02	372.865	681.305	765.58	483.435
54.3	199.99	610.66	532.995	645.465	153.75	82.045
61.57	523.18	357.19	409.115	271.265	381.38	155.695
58.51	130.88	317.37	29.325	711.425	4.58	314.605
146.39	98.07	1436.43	1025.37	466.365	335.78	552.085
[truncated: 2,689 more rows]
