# Supplementary material for: Heterogeneity in surface sensing suggests a division of labor in Pseudomonas aeruginosa populations
Source: eLife. 2019 Jun 10;8:e45084. doi: 10.7554/eLife.45084 (PMC6615863; doi:10.7554/eLife.45084)
Supplement: Figure 1—source data 2. — Calculated median values from the experimental distributions and 95% confidence intervals of the bootstrap distributions are overlaid on top of the bootstrap distribution probability plot. Data groups are statistically significantly different from each other if their confidence intervals do not overlap. [file elife-45084-fig1-data2.xlsx]

## Sheet: Sheet1
	0 h	2 h	4 h	6 h	8 h	10 h	12 h	Vector control
0 h		<0.0001	<0.0001	<0.0001	<0.0001	<0.0001	<0.0001	<0.0001
2 h	<0.0001		<0.0001	<0.0001	<0.0001	<0.0001	<0.0001	<0.0001
4 h	<0.0001	<0.0001		0.15	<0.0001	<0.0001	<0.0001	<0.0001
6 h	<0.0001	<0.0001	0.15		<0.0001	<0.0001	<0.0001	<0.0001
8 h	<0.0001	<0.0001	<0.0001	<0.0001		1	0.99	<0.0001
10 h	<0.0001	<0.0001	<0.0001	<0.0001	1		0.94	<0.0001
12 h	<0.0001	<0.0001	<0.0001	<0.0001	0.99	0.94		<0.0001
Vector control	<0.0001	<0.0001	<0.0001	<0.0001	<0.0001	<0.0001	<0.0001
