# Supplementary material for: Heterogeneity in surface sensing suggests a division of labor in Pseudomonas aeruginosa populations
Source: eLife. 2019 Jun 10;8:e45084. doi: 10.7554/eLife.45084 (PMC6615863; doi:10.7554/eLife.45084)
Supplement: Figure 3—source data 1. [file elife-45084-fig3-data1.xlsx]

## Sheet: L170D-1
FileName	Time (ms)	Z Pos	X Pos	Y Pos	ROI ID	ROI Area	ROI Mean Intensity(Red)	ROI Min Intensity(Red)	ROI Max Intensity(Red)	ROI Sum Intensity(Red)	ROI StDev Intensity(Red)	ROI Signal/Background(Red)	ROI Mean Intensity(Blue)	ROI Min Intensity(Blue)	ROI Max Intensity(Blue)	ROI Sum Intensity(Blue)	ROI StDev Intensity(Blue)	ROI Signal/Background(Blue)	ROI Mean Intensity(Mono)	ROI Min Intensity(Mono)	ROI Max Intensity(Mono)	ROI Sum Intensity(Mono)	ROI StDev Intensity(Mono)	ROI Signal/Background(Mono)	Area Fraction	Unit	Channel	Red ratio
Merged	6515.05	4453.9	4061.8	-3919.5	203	1501	138.511	99	485	207905	38.791	4.15244	505.179	223	1183	758273	230.403	4.15244	347.957	185	575	522283	87.6199	4.15244	0	px	Intensity	3.50153
Merged	6515.05	4453.9	4061.8	-3919.5	169	2842	117.969	89	389	335267	16.8996	4.15244	317.497	162	969	902327	150.385	4.15244	387.963	258	584	1102590	61.8517	4.15244	0	px	Intensity	3.29749
Merged	6515.05	4453.9	4061.8	-3919.5	452	365	133.792	95	439	48834	45.5734	4.15244	288.975	207	388	105476	43.3228	4.15244	376.537	236	549	137436	78.8766	4.15244	0	px	Intensity	3.28122			Mean
Merged	6515.05	4453.9	4061.8	-3919.5	84	558	146.181	100	472	81569	48.538	4.15244	688.258	282	1335	384048	251.785	4.15244	358.839	224	573	200232	72.928	4.15244	0	px	Intensity	3.22887			With focus		No focus
Merged	6515.05	4453.9	4061.8	-3919.5	331	1370	128.843	95	409	176515	28.8251	4.15244	433.464	223	986	593845	181.254	4.15244	350.002	196	894	479503	91.5191	4.15244	0	px	Intensity	3.1744			369.92		279.677
Merged	6515.05	4453.9	4061.8	-3919.5	100	2370	120.078	77	360	284586	19.3925	4.15244	370.934	188	790	879113	129.439	4.15244	387.7	235	618	918849	70.2945	4.15244	0	px	Intensity	2.99804
Merged	6515.05	4453.9	4061.8	-3919.5	416	1901	126.713	86	374	240882	23.8488	4.15244	386.363	208	808	734476	141.984	4.15244	366.852	186	1083	697385	142.054	4.15244	0	px	Intensity	2.95154
Merged	6515.05	4453.9	4061.8	-3919.5	27	3077	121.48	81	350	373795	18.3504	4.15244	365.749	164	667	1125411	111.202	4.15244	412.528	239	915	1269350	88.2956	4.15244	0	px	Intensity	2.88112
Merged	6515.05	4453.9	4061.8	-3919.5	365	581	124.454	78	357	72308	29.7191	4.15244	292.998	208	389	170232	36.7746	4.15244	293.399	171	550	170465	92.065	4.15244	0	px	Intensity	2.86852
Merged	6515.05	4453.9	4061.8	-3919.5	281	516	121.742	99	347	62819	31.708	4.15244	260.651	206	336	134496	25.09	4.15244	354.709	231	577	183030	69.4249	4.15244	0	px	Intensity	2.85028
Merged	6515.05	4453.9	4061.8	-3919.5	256	1597	123.518	91	345	197258	18.8107	4.15244	411.054	230	719	656454	118.479	4.15244	387.88	219	1094	619444	112.736	4.15244	0	px	Intensity	2.79312
Merged	6515.05	4453.9	4061.8	-3919.5	258	140	229.857	136	632	32180	90.2115	4.15244	1188.29	667	1494	166361	198.477	4.15244	430.093	337	579	60213	46.7769	4.15244	0	px	Intensity	2.74953
Merged	6515.05	4453.9	4061.8	-3919.5	87	635	139.488	97	370	88575	33.7834	4.15244	489.214	227	1073	310651	234.623	4.15244	326.546	167	544	207357	82.8921	4.15244	0	px	Intensity	2.65255
Merged	6515.05	4453.9	4061.8	-3919.5	123	1384	118.315	93	307	163748	18.2769	4.15244	269.229	192	372	372613	31.9494	4.15244	389.508	225	1059	539079	105.266	4.15244	0	px	Intensity	2.59477
Merged	6515.05	4453.9	4061.8	-3919.5	345	651	142.496	102	366	92765	26.3157	4.15244	878.573	293	1684	571951	416.007	4.15244	448.292	291	651	291838	65.2118	4.15244	0	px	Intensity	2.56849
Merged	6515.05	4453.9	4061.8	-3919.5	279	913	122.393	95	307	111745	23.1789	4.15244	374.704	202	609	342105	88.47	4.15244	370.804	208	561	338544	72.9148	4.15244	0	px	Intensity	2.50831
Merged	6515.05	4453.9	4061.8	-3919.5	443	606	123.38	97	297	74768	23.2197	4.15244	303.322	201	480	183813	62.6002	4.15244	376.267	246	574	228018	71.3992	4.15244	0	px	Intensity	2.40721
Merged	6515.05	4453.9	4061.8	-3919.5	459	1165	119.154	92	285	138814	17.3741	4.15244	274.53	185	391	319828	35.5276	4.15244	366.956	230	546	427504	70.0902	4.15244	0	px	Intensity	2.39187
Merged	6515.05	4453.9	4061.8	-3919.5	50	530	114.942	77	269	60919	18.694	4.15244	229.8	181	292	121794	18.2575	4.15244	314.757	183	528	166821	86.2205	4.15244	0	px	Intensity	2.34032
Merged	6515.05	4453.9	4061.8	-3919.5	191	435	139.715	104	323	60776	28.6344	4.15244	649.6	264	989	282576	174.461	4.15244	357.749	234	528	155621	67.2397	4.15244	0	px	Intensity	2.31185
Merged	6515.05	4453.9	4061.8	-3919.5	394	408	127.762	96	295	52127	28.0104	4.15244	263.676	183	345	107580	35.4111	4.15244	351.816	237	562	143541	77.3458	4.15244	0	px	Intensity	2.30898
Merged	6515.05	4453.9	4061.8	-3919.5	329	845	120.789	80	277	102067	20.9985	4.15244	313.275	193	502	264717	85.4686	4.15244	340.778	223	560	287957	71.4296	4.15244	0	px	Intensity	2.29325
Merged	6515.05	4453.9	4061.8	-3919.5	231	2317	116.607	83	267	270178	12.2635	4.15244	307.682	190	485	712899	61.141	4.15244	446.618	213	1500	1034814	147.033	4.15244	0	px	Intensity	2.28975
Merged	6515.05	4453.9	4061.8	-3919.5	425	376	164.492	96	374	61849	45.4369	4.15244	884.402	250	1678	332535	428.415	4.15244	382.612	230	546	143862	72.7617	4.15244	0	px	Intensity	2.27367
Merged	6515.05	4453.9	4061.8	-3919.5	321	2759	133.369	87	300	367964	18.8303	4.15244	508.291	238	995	1402374	143.366	4.15244	405.382	179	1310	1118448	152.619	4.15244	0	px	Intensity	2.2494
Merged	6515.05	4453.9	4061.8	-3919.5	30	987	121.232	92	272	119656	18.5482	4.15244	383.1	198	666	378120	114.775	4.15244	353.704	235	537	349106	63.5147	4.15244	0	px	Intensity	2.24363
Merged	6515.05	4453.9	4061.8	-3919.5	411	528	120.089	94	269	63407	22.2323	4.15244	303.756	197	413	160383	45.3564	4.15244	297.532	165	527	157097	101.888	4.15244	0	px	Intensity	2.24001
Merged	6515.05	4453.9	4061.8	-3919.5	412	645	120.952	94	268	78014	19.6547	4.15244	312.76	199	401	201730	36.7099	4.15244	418.291	260	565	269798	61.0336	4.15244	0	px	Intensity	2.21576
Merged	6515.05	4453.9	4061.8	-3919.5	136	1568	118.771	93	258	186233	13.8414	4.15244	388.536	203	910	609224	137.738	4.15244	360.515	226	580	565288	66.6901	4.15244	0	px	Intensity	2.17225
Merged	6515.05	4453.9	4061.8	-3919.5	473	1750	115.5	75	250	202125	11.3027	4.15244	311.777	181	519	545609	63.2706	4.15244	353.011	173	1244	617770	153.061	4.15244	0	px	Intensity	2.1645
Merged	6515.05	4453.9	4061.8	-3919.5	471	349	118.868	87	257	41485	22.808	4.15244	242.582	183	305	84661	23.0253	4.15244	315.67	188	526	110169	83.6515	4.15244	0	px	Intensity	2.16206
Merged	6515.05	4453.9	4061.8	-3919.5	380	528	125.915	101	269	66483	20.1357	4.15244	510.036	218	773	269299	134.85	4.15244	326.814	210	533	172558	72.4264	4.15244	0	px	Intensity	2.13637
Merged	6515.05	4453.9	4061.8	-3919.5	460	411	114.81	96	244	47187	16.472	4.15244	215.027	168	263	88376	17.202	4.15244	299.526	189	566	123105	88.0238	4.15244	0	px	Intensity	2.12525
Merged	6515.05	4453.9	4061.8	-3919.5	116	1915	115.312	84	245	220822	13.4667	4.15244	278.332	201	412	533005	35.4187	4.15244	394.645	245	750	755745	70.1014	4.15244	0	px	Intensity	2.12468
Merged	6515.05	4453.9	4061.8	-3919.5	322	1048	126.39	93	266	132457	19.633	4.15244	515.916	229	1209	540680	238.372	4.15244	376.051	240	561	394101	62.5489	4.15244	0	px	Intensity	2.10459
Merged	6515.05	4453.9	4061.8	-3919.5	104	1532	113.36	95	238	173667	10.7917	4.15244	256.576	178	331	393075	23.1234	4.15244	367.304	246	538	562709	58.521	4.15244	0	px	Intensity	2.09951
Merged	6515.05	4453.9	4061.8	-3919.5	352	1189	128.243	93	269	152481	23.2309	4.15244	418.952	197	923	498134	182.472	4.15244	501.709	305	956	596532	98.1305	4.15244	0	px	Intensity	2.09758
Merged	6515.05	4453.9	4061.8	-3919.5	280	640	112.236	98	233	71831	13.7518	4.15244	227.953	174	274	145890	18.6978	4.15244	366.211	239	539	234375	69.2897	4.15244	0	px	Intensity	2.07598
Merged	6515.05	4453.9	4061.8	-3919.5	111	791	127.675	99	262	100991	19.241	4.15244	469.604	241	904	371457	154.737	4.15244	334.924	217	575	264925	67.6018	4.15244	0	px	Intensity	2.05208
Merged	6515.05	4453.9	4061.8	-3919.5	392	1192	116.326	95	237	138661	13.4149	4.15244	292.571	183	500	348745	68.133	4.15244	357.407	217	551	426029	70.2646	4.15244	0	px	Intensity	2.03737
Merged	6515.05	4453.9	4061.8	-3919.5	385	533	120.139	94	242	64034	15.4641	4.15244	318.872	237	431	169959	35.8189	4.15244	327.634	201	547	174629	86.3854	4.15244	0	px	Intensity	2.01434
Merged	6515.05	4453.9	4061.8	-3919.5	335	338	124.905	95	251	42218	19.4662	4.15244	310.367	220	404	104904	34.6102	4.15244	335.044	199	514	113245	78.8373	4.15244	0	px	Intensity	2.00952
Merged	6515.05	4453.9	4061.8	-3919.5	372	1088	115.925	89	231	126126	12.2344	4.15244	282.79	212	374	307676	25.4395	4.15244	427.537	248	1124	465160	125.885	4.15244	0	px	Intensity	1.99267
Merged	6515.05	4453.9	4061.8	-3919.5	62	1075	124.645	95	248	133993	15.7855	4.15244	319.224	216	445	343166	37.9809	4.15244	389.819	181	863	419055	132.523	4.15244	0	px	Intensity	1.98966
Merged	6515.05	4453.9	4061.8	-3919.5	437	711	113.411	96	225	80635	14.7199	4.15244	234.329	178	297	166608	20.2651	4.15244	326.03	195	566	231807	85.677	4.15244	0	px	Intensity	1.98394
Merged	6515.05	4453.9	4061.8	-3919.5	426	2164	127.563	97	251	276046	21.0599	4.15244	428.746	193	1460	927807	233.061	4.15244	455.827	257	1245	986409	121.164	4.15244	0	px	Intensity	1.96766
Merged	6515.05	4453.9	4061.8	-3919.5	199	716	111.87	90	219	80099	11.537	4.15244	207.141	166	251	148313	14.0236	4.15244	419.865	272	572	300623	59.4929	4.15244	0	px	Intensity	1.95763
Merged	6515.05	4453.9	4061.8	-3919.5	346	1109	116.202	90	224	128868	13.0869	4.15244	288.745	181	490	320218	64.6478	4.15244	337.172	183	571	373924	90.5048	4.15244	0	px	Intensity	1.92768
Merged	6515.05	4453.9	4061.8	-3919.5	153	522	116.153	100	222	60632	14.662	4.15244	267.188	187	367	139472	32.0493	4.15244	317.914	197	522	165951	73.9409	4.15244	0	px	Intensity	1.91127
Merged	6515.05	4453.9	4061.8	-3919.5	172	1353	121.105	88	230	163855	15.2986	4.15244	345.53	208	485	467502	57.7252	4.15244	335.992	171	593	454597	89.3611	4.15244	0	px	Intensity	1.89918
Merged	6515.05	4453.9	4061.8	-3919.5	149	421	134.159	94	254	56481	23.5429	4.15244	475.52	257	708	200194	116.646	4.15244	311.644	194	549	131202	89.8495	4.15244	0	px	Intensity	1.89327
Merged	6515.05	4453.9	4061.8	-3919.5	291	963	117.542	95	222	113193	14.7296	4.15244	378.197	182	840	364204	188.074	4.15244	381.856	235	573	367727	72.3783	4.15244	0	px	Intensity	1.88869
Merged	6515.05	4453.9	4061.8	-3919.5	381	916	124.175	95	234	113744	17.1784	4.15244	401.773	252	668	368024	89.3783	4.15244	337.953	192	672	309565	87.0459	4.15244	0	px	Intensity	1.88444
Merged	6515.05	4453.9	4061.8	-3919.5	81	1362	110.963	88	209	151131	9.55067	4.15244	215.192	161	276	293092	15.3667	4.15244	347.866	233	562	473793	67.0796	4.15244	0	px	Intensity	1.88352
Merged	6515.05	4453.9	4061.8	-3919.5	370	535	113.63	97	214	60792	12.6899	4.15244	220.219	177	262	117817	15.2642	4.15244	336.563	215	541	180061	77.4637	4.15244	0	px	Intensity	1.88331
Merged	6515.05	4453.9	4061.8	-3919.5	308	572	114.946	95	216	65749	16.1117	4.15244	228.523	175	291	130715	18.3584	4.15244	305.677	188	547	174847	83.5451	4.15244	0	px	Intensity	1.87915
Merged	6515.05	4453.9	4061.8	-3919.5	344	1040	117.625	88	220	122330	13.0538	4.15244	413.186	225	613	429713	88.8083	4.15244	386.133	227	548	401578	73.4094	4.15244	0	px	Intensity	1.87035
Merged	6515.05	4453.9	4061.8	-3919.5	320	831	117.742	94	220	97844	13.0562	4.15244	320.103	203	424	266006	42.9506	4.15244	321.901	195	530	267500	73.7262	4.15244	0	px	Intensity	1.86848
Merged	6515.05	4453.9	4061.8	-3919.5	101	842	123.873	84	231	104301	15.6894	4.15244	358.688	208	543	302015	68.207	4.15244	369.271	198	689	310926	100.532	4.15244	0	px	Intensity	1.86481
Merged	6515.05	4453.9	4061.8	-3919.5	266	908	119.783	91	223	108763	13.6392	4.15244	365.638	179	637	331999	111.007	4.15244	401.337	234	1117	364414	133.013	4.15244	0	px	Intensity	1.8617
Merged	6515.05	4453.9	4061.8	-3919.5	419	1432	121.994	90	227	174696	14.6848	4.15244	379.166	197	578	542966	75.8571	4.15244	412.413	258	742	590575	69.7375	4.15244	0	px	Intensity	1.86074
Merged	6515.05	4453.9	4061.8	-3919.5	409	505	123.661	93	230	62449	17.9184	4.15244	407.689	222	620	205883	99.4204	4.15244	391.137	242	548	197524	69.715	4.15244	0	px	Intensity	1.85992
Merged	6515.05	4453.9	4061.8	-3919.5	19	1656	116.877	93	217	193549	12.3737	4.15244	314.214	191	531	520339	77.9865	4.15244	396.336	207	1114	656332	148.077	4.15244	0	px	Intensity	1.85665
Merged	6515.05	4453.9	4061.8	-3919.5	294	1621	123.613	95	228	200376	13.7855	4.15244	426.622	217	674	691554	105.477	4.15244	356.023	198	539	577113	74.133	4.15244	0	px	Intensity	1.84447
Merged	6515.05	4453.9	4061.8	-3919.5	375	1234	113.071	76	206	139529	10.7036	4.15244	233.989	165	317	288742	23.1016	4.15244	352.876	217	555	435449	77.6895	4.15244	0	px	Intensity	1.82187
Merged	6515.05	4453.9	4061.8	-3919.5	82	867	115.487	92	210	100127	11.6131	4.15244	295.977	188	468	256612	66.5095	4.15244	385.008	218	549	333802	67.792	4.15244	0	px	Intensity	1.81839
Merged	6515.05	4453.9	4061.8	-3919.5	240	920	122.167	90	222	112394	14.0953	4.15244	378.502	216	654	348222	109.63	4.15244	375.982	216	605	345903	67.9874	4.15244	0	px	Intensity	1.81718
Merged	6515.05	4453.9	4061.8	-3919.5	383	375	122.181	88	222	45818	19.2942	4.15244	448.093	202	744	168035	144.699	4.15244	404.979	226	550	151867	67.9269	4.15244	0	px	Intensity	1.81697
Merged	6515.05	4453.9	4061.8	-3919.5	36	373	119.137	96	216	44438	13.0061	4.15244	301.102	167	467	112311	70.2087	4.15244	336.705	199	570	125591	79.4189	4.15244	0	px	Intensity	1.81304
Merged	6515.05	4453.9	4061.8	-3919.5	435	1218	117.204	91	211	142754	15.0834	4.15244	379.329	182	1029	462023	218.605	4.15244	370.41	220	610	451159	73.781	4.15244	0	px	Intensity	1.80029
Merged	6515.05	4453.9	4061.8	-3919.5	268	1135	111.686	95	200	126764	10.1714	4.15244	239.65	160	348	272003	30.5935	4.15244	384.532	219	571	436444	73.4849	4.15244	0	px	Intensity	1.79073
Merged	6515.05	4453.9	4061.8	-3919.5	377	364	113.06	88	200	41154	13.0166	4.15244	232.308	175	284	84560	18.8365	4.15244	368.346	235	549	134078	71.4967	4.15244	0	px	Intensity	1.76897
Merged	6515.05	4453.9	4061.8	-3919.5	402	648	118.606	71	208	76857	13.9113	4.15244	329.892	202	575	213770	88.1357	4.15244	312.903	192	547	202761	79.2281	4.15244	0	px	Intensity	1.7537
Merged	6515.05	4453.9	4061.8	-3919.5	102	448	114.879	96	200	51466	12.9825	4.15244	244.364	189	301	109475	20.2466	4.15244	375.513	254	534	168230	71.7522	4.15244	0	px	Intensity	1.74096		Cutoff for cells with a focus
Merged	6515.05	4453.9	4061.8	-3919.5	433	679	115.654	96	200	78529	12.8336	4.15244	269.224	171	353	182803	34.1708	4.15244	370.377	217	556	251486	74.8769	4.15244	0	px	Intensity	1.7293
Merged	6515.05	4453.9	4061.8	-3919.5	432	1001	114.763	91	198	114878	10.7687	4.15244	300.387	206	375	300687	31.0216	4.15244	311.743	173	588	312055	83.1386	4.15244	0	px	Intensity	1.72529
Merged	6515.05	4453.9	4061.8	-3919.5	121	1444	112.436	82	192	162357	9.01289	4.15244	238.99	163	327	345102	29.2961	4.15244	342.024	185	828	493882	105.431	4.15244	0	px	Intensity	1.70764
Merged	6515.05	4453.9	4061.8	-3919.5	447	1175	115.386	84	196	135578	9.72899	4.15244	380.307	212	541	446861	65.2833	4.15244	338.503	206	564	397741	77.9172	4.15244	0	px	Intensity	1.69865
Merged	6515.05	4453.9	4061.8	-3919.5	175	622	120.899	96	205	75199	13.0852	4.15244	313.019	224	395	194698	29.58	4.15244	408.752	268	554	254244	54.516	4.15244	0	px	Intensity	1.69563
Merged	6515.05	4453.9	4061.8	-3919.5	342	685	140.978	105	239	96570	19.9744	4.15244	805.81	343	1680	551980	371.077	4.15244	457.235	308	681	313206	67.7887	4.15244	0	px	Intensity	1.6953
Merged	6515.05	4453.9	4061.8	-3919.5	400	443	118.124	93	199	52329	12.8789	4.15244	299.174	246	368	132534	21.9813	4.15244	389.869	231	544	172712	65.6423	4.15244	0	px	Intensity	1.68467
Merged	6515.05	4453.9	4061.8	-3919.5	307	1580	115.251	94	193	182096	9.52311	4.15244	294.926	215	435	465983	31.3909	4.15244	375.573	187	1011	593406	97.1524	4.15244	0	px	Intensity	1.67461
Merged	6515.05	4453.9	4061.8	-3919.5	315	425	112.518	82	188	47820	10.1632	4.15244	251.092	169	330	106714	34.9348	4.15244	398.515	254	570	169369	65.1427	4.15244	0	px	Intensity	1.67085
Merged	6515.05	4453.9	4061.8	-3919.5	94	964	112.387	80	187	108341	10.2276	4.15244	244.407	166	311	235608	21.1368	4.15244	326.27	176	559	314524	82.4215	4.15244	0	px	Intensity	1.66389
Merged	6515.05	4453.9	4061.8	-3919.5	70	1634	115.287	67	191	188379	11.3865	4.15244	246.213	157	371	402312	40.8604	4.15244	331.678	187	546	541962	77.7478	4.15244	0	px	Intensity	1.65673
Merged	6515.05	4453.9	4061.8	-3919.5	157	1768	120.136	92	199	212401	11.6999	4.15244	374.794	210	883	662635	148.19	4.15244	453.623	238	1222	802005	129.697	4.15244	0	px	Intensity	1.65645
Merged	6515.05	4453.9	4061.8	-3919.5	303	1539	113.06	93	185	173999	8.2446	4.15244	263.014	180	333	404778	25.3459	4.15244	320.737	192	542	493615	79.4308	4.15244	0	px	Intensity	1.6363
Merged	6515.05	4453.9	4061.8	-3919.5	290	1298	114.91	91	188	149153	9.61013	4.15244	275.774	183	390	357955	38.5125	4.15244	346.29	222	708	449484	74.0597	4.15244	0	px	Intensity	1.63606
Merged	6515.05	4453.9	4061.8	-3919.5	347	1179	115.85	77	189	136587	10.1604	4.15244	356.324	196	626	420106	105.732	4.15244	338.041	202	632	398550	79.2173	4.15244	0	px	Intensity	1.63142
Merged	6515.05	4453.9	4061.8	-3919.5	63	602	114.294	88	184	68805	10.2508	4.15244	306.307	201	422	184397	52.0469	4.15244	329.271	199	553	198221	77.3575	4.15244	0	px	Intensity	1.60988
Merged	6515.05	4453.9	4061.8	-3919.5	248	1536	133.329	100	214	204794	15.0634	4.15244	484.39	249	888	744023	139.774	4.15244	437.168	196	1257	671490	146.932	4.15244	0	px	Intensity	1.60505
Merged	6515.05	4453.9	4061.8	-3919.5	56	494	121.747	98	195	60143	12.3796	4.15244	359.267	256	594	177478	68.8006	4.15244	397.543	240	563	196386	68.5819	4.15244	0	px	Intensity	1.60168
Merged	6515.05	4453.9	4061.8	-3919.5	137	1913	113.26	87	181	216667	9.15873	4.15244	239.27	179	329	457724	21.8925	4.15244	439.722	184	1261	841189	192.061	4.15244	0	px	Intensity	1.59809
Merged	6515.05	4453.9	4061.8	-3919.5	261	661	110.489	96	176	73033	9.58313	4.15244	212.89	169	275	140720	16.3472	4.15244	416.177	265	552	275093	67.4776	4.15244	0	px	Intensity	1.59292
Merged	6515.05	4453.9	4061.8	-3919.5	389	439	117.383	81	186	51531	9.63998	4.15244	319.727	237	421	140360	39.4676	4.15244	350.228	198	532	153750	88.5762	4.15244	0	px	Intensity	1.58456
Merged	6515.05	4453.9	4061.8	-3919.5	338	1460	115.21	94	182	168206	9.07708	4.15244	357.766	208	619	522339	67.4859	4.15244	419.088	215	654	611868	74.4786	4.15244	0	px	Intensity	1.57973
Merged	6515.05	4453.9	4061.8	-3919.5	202	989	117.137	97	185	115848	11.0825	4.15244	335.749	198	545	332056	70.7009	4.15244	360.053	236	544	356092	69.7013	4.15244	0	px	Intensity	1.57935
Merged	6515.05	4453.9	4061.8	-3919.5	474	613	122.223	94	193	74923	10.8628	4.15244	318.483	211	472	195230	49.476	4.15244	415.527	280	568	254718	61.8044	4.15244	0	px	Intensity	1.57907
Merged	6515.05	4453.9	4061.8	-3919.5	213	605	120.621	96	190	72976	11.608	4.15244	430.727	207	673	260590	120.288	4.15244	358.26	238	567	216747	71.0534	4.15244	0	px	Intensity	1.57518
Merged	6515.05	4453.9	4061.8	-3919.5	242	556	124.928	94	196	69460	13.8619	4.15244	397.879	254	544	221221	53.3669	4.15244	361.781	189	523	201150	82.6776	4.15244	0	px	Intensity	1.5689
Merged	6515.05	4453.9	4061.8	-3919.5	148	508	114.533	85	179	58183	11.4191	4.15244	251.368	193	317	127695	25.1576	4.15244	313.726	194	558	159373	89.1369	4.15244	0	px	Intensity	1.56286
Merged	6515.05	4453.9	4061.8	-3919.5	57	633	123.771	94	193	78347	12.6718	4.15244	363.041	218	559	229805	80.3375	4.15244	344.022	196	745	217766	99.0411	4.15244	0	px	Intensity	1.55933
Merged	6515.05	4453.9	4061.8	-3919.5	150	641	112.925	84	175	72385	10.7814	4.15244	245.626	181	326	157446	26.4218	4.15244	412.362	266	569	264324	58.0403	4.15244	0	px	Intensity	1.5497
Merged	6515.05	4453.9	4061.8	-3919.5	92	372	118.989	83	184	44264	9.96476	4.15244	308.207	235	366	114653	25.3675	4.15244	340.68	210	550	126733	80.1838	4.15244	0	px	Intensity	1.54636
Merged	6515.05	4453.9	4061.8	-3919.5	233	890	119.43	81	184	106293	10.0707	4.15244	404.924	253	548	360382	49.7151	4.15244	326.156	188	564	290279	83.7232	4.15244	0	px	Intensity	1.54065
Merged	6515.05	4453.9	4061.8	-3919.5	454	368	124.033	97	191	45644	13.7028	4.15244	452.171	244	665	166399	108.068	4.15244	372.603	220	547	137118	78.3475	4.15244	0	px	Intensity	1.53992
Merged	6515.05	4453.9	4061.8	-3919.5	222	816	118.499	79	182	96695	13.2166	4.15244	331.078	184	661	270160	120.373	4.15244	309.324	163	561	252408	98.6602	4.15244	0	px	Intensity	1.53588
Merged	6515.05	4453.9	4061.8	-3919.5	239	390	122.572	100	188	47803	10.7179	4.15244	448.128	375	526	174770	28.238	4.15244	377.469	255	528	147213	64.5167	4.15244	0	px	Intensity	1.53379
Merged	6515.05	4453.9	4061.8	-3919.5	324	716	110.923	88	170	79421	8.16799	4.15244	251.399	182	322	180002	23.8339	4.15244	395.443	238	542	283137	66.1497	4.15244	0	px	Intensity	1.53259
Merged	6515.05	4453.9	4061.8	-3919.5	182	1012	112.902	92	173	114257	9.64057	4.15244	234.363	168	311	237175	22.4525	4.15244	356.125	233	533	360399	63.1908	4.15244	0	px	Intensity	1.5323
Merged	6515.05	4453.9	4061.8	-3919.5	288	464	130.56	94	200	60580	16.013	4.15244	685.216	259	1121	317940	239.682	4.15244	381.595	237	535	177060	75.6586	4.15244	0	px	Intensity	1.53186
Merged	6515.05	4453.9	4061.8	-3919.5	128	527	114.427	88	174	60303	10.3375	4.15244	279.835	177	394	147473	46.2753	4.15244	386.715	250	554	203799	67.3574	4.15244	0	px	Intensity	1.52062
Merged	6515.05	4453.9	4061.8	-3919.5	110	671	115.687	96	175	77626	8.99428	4.15244	298.908	218	405	200567	21.8169	4.15244	333.887	187	548	224038	84.0779	4.15244	0	px	Intensity	1.5127
Merged	6515.05	4453.9	4061.8	-3919.5	405	1315	119.211	81	180	156762	10.2279	4.15244	310.535	205	486	408354	53.1371	4.15244	396.782	189	1207	521768	180.717	4.15244	0	px	Intensity	1.50993
Merged	6515.05	4453.9	4061.8	-3919.5	334	1833	112.965	93	169	207064	7.80616	4.15244	295.863	195	451	542316	45.5311	4.15244	441.666	260	905	809573	82.746	4.15244	0	px	Intensity	1.49604
Merged	6515.05	4453.9	4061.8	-3919.5	382	1038	116.319	93	174	120739	9.30715	4.15244	329.601	193	638	342126	77.4565	4.15244	378.822	198	1168	393217	129.636	4.15244	0	px	Intensity	1.49589
Merged	6515.05	4453.9	4061.8	-3919.5	317	483	117.056	88	175	56538	10.3322	4.15244	370.677	201	554	179037	83.5538	4.15244	345.907	225	536	167073	77.3022	4.15244	0	px	Intensity	1.49501
Merged	6515.05	4453.9	4061.8	-3919.5	330	947	111.732	91	167	105810	7.90543	4.15244	223.377	173	295	211538	20.4354	4.15244	387.147	212	550	366628	72.6238	4.15244	0	px	Intensity	1.49465
Merged	6515.05	4453.9	4061.8	-3919.5	75	885	115.756	98	173	102444	8.95622	4.15244	339.388	202	522	300358	66.6955	4.15244	362.528	229	573	320837	71.8759	4.15244	0	px	Intensity	1.49452
Merged	6515.05	4453.9	4061.8	-3919.5	465	898	118.499	86	177	106412	14.0133	4.15244	290.106	207	377	260515	27.2594	4.15244	418.661	280	575	375958	61.2978	4.15244	0	px	Intensity	1.49368
Merged	6515.05	4453.9	4061.8	-3919.5	188	1138	116.397	76	173	132460	9.98587	4.15244	320.361	214	430	364571	43.288	4.15244	312.686	183	646	355837	87.697	4.15244	0	px	Intensity	1.48629
Merged	6515.05	4453.9	4061.8	-3919.5	413	1308	110.209	93	163	144154	6.91793	4.15244	226.441	178	290	296185	18.269	4.15244	299.489	176	560	391731	84.9648	4.15244	0	px	Intensity	1.479
Merged	6515.05	4453.9	4061.8	-3919.5	187	497	112.944	98	167	56133	8.14832	4.15244	257.374	187	345	127915	30.8336	4.15244	333.501	207	520	165750	73.4696	4.15244	0	px	Intensity	1.47861
Merged	6515.05	4453.9	4061.8	-3919.5	204	424	109.691	96	162	46509	7.55375	4.15244	198.708	155	238	84252	14.0918	4.15244	323.075	165	544	136984	101.677	4.15244	0	px	Intensity	1.47688
Merged	6515.05	4453.9	4061.8	-3919.5	237	908	119.182	96	176	108217	8.85669	4.15244	322.091	232	601	292459	50.8667	4.15244	388.014	233	572	352317	67.7366	4.15244	0	px	Intensity	1.47674
Merged	6515.05	4453.9	4061.8	-3919.5	133	756	130.198	101	191	98430	15.0189	4.15244	592.217	222	1005	447716	174.833	4.15244	404.881	258	565	306090	64.587	4.15244	0	px	Intensity	1.46699
Merged	6515.05	4453.9	4061.8	-3919.5	180	818	128.278	101	188	104931	12.9707	4.15244	421.968	244	665	345170	90.7924	4.15244	363.028	195	558	296957	89.2494	4.15244	0	px	Intensity	1.46557
Merged	6515.05	4453.9	4061.8	-3919.5	160	483	111.998	89	164	54095	8.87558	4.15244	211.246	173	262	102032	14.5268	4.15244	298.557	170	517	144203	95.1856	4.15244	0	px	Intensity	1.46431
Merged	6515.05	4453.9	4061.8	-3919.5	77	1153	112.029	90	164	129170	7.29292	4.15244	269.448	176	412	310674	38.3233	4.15244	395.008	264	578	455444	64.1267	4.15244	0	px	Intensity	1.4639
Merged	6515.05	4453.9	4061.8	-3919.5	186	1517	116.496	70	169	176725	9.8383	4.15244	353.773	193	680	536674	116.495	4.15244	398.581	240	596	604647	71.3976	4.15244	0	px	Intensity	1.45069
Merged	6515.05	4453.9	4061.8	-3919.5	138	625	114.008	96	165	71255	9.46265	4.15244	255.717	181	349	159823	33.2394	4.15244	329.149	177	602	205718	85.042	4.15244	0	px	Intensity	1.44727
Merged	6515.05	4453.9	4061.8	-3919.5	469	1070	120.937	73	175	129403	12.5509	4.15244	318.857	199	555	341177	67.4	4.15244	462.469	268	1056	494842	108.647	4.15244	0	px	Intensity	1.44703
Merged	6515.05	4453.9	4061.8	-3919.5	249	804	112.287	88	162	90279	7.10936	4.15244	249.93	177	339	200944	27.7675	4.15244	337.281	209	534	271174	68.6887	4.15244	0	px	Intensity	1.44273
Merged	6515.05	4453.9	4061.8	-3919.5	48	2034	114.457	79	165	232806	8.34623	4.15244	284.66	205	499	578998	42.3386	4.15244	381.976	222	715	776939	86.0714	4.15244	0	px	Intensity	1.44159
Merged	6515.05	4453.9	4061.8	-3919.5	51	970	111.101	87	160	107768	7.77144	4.15244	246.071	173	340	238689	29.4458	4.15244	396.631	240	544	384732	62.6163	4.15244	0	px	Intensity	1.44013
Merged	6515.05	4453.9	4061.8	-3919.5	40	694	111.3	94	160	77242	8.19575	4.15244	234.476	168	296	162726	24.6153	4.15244	381.769	260	549	264948	63.612	4.15244	0	px	Intensity	1.43756
Merged	6515.05	4453.9	4061.8	-3919.5	112	1527	112.707	89	162	172103	7.79694	4.15244	286.448	180	464	437406	74.5227	4.15244	317.48	181	545	484792	88.741	4.15244	0	px	Intensity	1.43736
Merged	6515.05	4453.9	4061.8	-3919.5	232	1551	115.718	63	166	179479	8.73225	4.15244	356.723	200	558	553278	71.0709	4.15244	339.875	204	613	527146	69.9717	4.15244	0	px	Intensity	1.43452
Merged	6515.05	4453.9	4061.8	-3919.5	88	602	109.762	81	157	66077	5.85601	4.15244	248.385	200	303	149528	17.7441	4.15244	303.777	173	554	182874	88.677	4.15244	0	px	Intensity	1.43036
Merged	6515.05	4453.9	4061.8	-3919.5	384	459	111.468	97	158	51164	6.61463	4.15244	246.316	184	316	113059	25.54	4.15244	353.362	225	564	162193	79.8631	4.15244	0	px	Intensity	1.41744
Merged	6515.05	4453.9	4061.8	-3919.5	418	506	118.777	90	168	60101	13.4041	4.15244	338.739	193	603	171402	114.261	4.15244	428.632	276	566	216888	59.2676	4.15244	0	px	Intensity	1.41442
Merged	6515.05	4453.9	4061.8	-3919.5	18	1111	108.944	91	154	121037	6.02398	4.15244	242.394	167	388	269300	36.0622	4.15244	327.553	177	553	363911	76.8854	4.15244	0	px	Intensity	1.41357
Merged	6515.05	4453.9	4061.8	-3919.5	417	1143	114.196	93	161	130526	8.41237	4.15244	297.64	190	428	340202	50.8071	4.15244	367.323	202	545	419850	74.254	4.15244	0	px	Intensity	1.40986
Merged	6515.05	4453.9	4061.8	-3919.5	284	222	108.703	94	153	24132	5.68677	4.15244	229.815	182	291	51019	18.455	4.15244	455.009	329	555	101012	45.2755	4.15244	0	px	Intensity	1.40751
Merged	6515.05	4453.9	4061.8	-3919.5	131	806	121.629	94	171	98033	11.1417	4.15244	437.94	223	812	352980	141.344	4.15244	364.267	227	559	293599	68.0187	4.15244	0	px	Intensity	1.40591
Merged	6515.05	4453.9	4061.8	-3919.5	455	492	122.37	98	172	60206	11.8986	4.15244	428.872	268	645	211005	99.3036	4.15244	449.23	294	569	221021	52.724	4.15244	0	px	Intensity	1.40557
Merged	6515.05	4453.9	4061.8	-3919.5	250	1312	116.735	85	164	153156	8.0879	4.15244	354.569	237	537	465195	46.9763	4.15244	417.334	205	1078	547542	129.131	4.15244	0	px	Intensity	1.40489
Merged	6515.05	4453.9	4061.8	-3919.5	440	843	113.24	96	159	95461	7.72962	4.15244	287.911	171	529	242709	71.1678	4.15244	311.359	179	590	262476	81.6625	4.15244	0	px	Intensity	1.4041
Merged	6515.05	4453.9	4061.8	-3919.5	247	281	131.117	94	184	36844	12.1137	4.15244	540.612	368	783	151912	89.4078	4.15244	371.665	219	537	104438	76.2011	4.15244	0	px	Intensity	1.40332
Merged	6515.05	4453.9	4061.8	-3919.5	245	511	109.769	92	154	56092	7.77754	4.15244	218.562	167	275	111685	19.4126	4.15244	424.855	270	579	217101	61.9534	4.15244	0	px	Intensity	1.40295
Merged	6515.05	4453.9	4061.8	-3919.5	488	231	115.316	97	161	26638	9.39681	4.15244	238.537	188	305	55102	21.9937	4.15244	305.61	196	515	70596	79.1558	4.15244	0	px	Intensity	1.39616
Merged	6515.05	4453.9	4061.8	-3919.5	293	469	123.836	98	172	58079	14.508	4.15244	571.356	219	1053	267966	229.09	4.15244	414.851	247	556	194565	61.8999	4.15244	0	px	Intensity	1.38894
Merged	6515.05	4453.9	4061.8	-3919.5	106	681	112.335	93	156	76500	6.73479	4.15244	259.27	181	330	176563	26.2581	4.15244	348.022	241	518	237003	64.465	4.15244	0	px	Intensity	1.38871
Merged	6515.05	4453.9	4061.8	-3919.5	197	905	118.91	82	165	107614	9.96138	4.15244	367.666	246	653	332738	85.6078	4.15244	352.859	184	551	319337	84.2567	4.15244	0	px	Intensity	1.3876
Merged	6515.05	4453.9	4061.8	-3919.5	20	426	109.631	75	152	46703	7.88535	4.15244	221.746	157	278	94464	20.1007	4.15244	395.19	274	550	168351	63.278	4.15244	0	px	Intensity	1.38646
Merged	6515.05	4453.9	4061.8	-3919.5	264	518	121.224	99	168	62794	10.4112	4.15244	349.699	267	450	181144	38.5996	4.15244	394.653	245	530	204430	66.975	4.15244	0	px	Intensity	1.38586
Merged	6515.05	4453.9	4061.8	-3919.5	146	487	112.698	96	156	54884	8.61129	4.15244	249.347	176	336	121432	24.3748	4.15244	345.086	215	530	168057	72.4997	4.15244	0	px	Intensity	1.38423
Merged	6515.05	4453.9	4061.8	-3919.5	407	1511	111.486	83	154	168455	7.39899	4.15244	249.941	165	352	377661	31.9667	4.15244	327.324	168	573	494586	90.8173	4.15244	0	px	Intensity	1.38134
Merged	6515.05	4453.9	4061.8	-3919.5	341	398	116.05	93	160	46188	8.82149	4.15244	347.44	236	428	138281	40.8909	4.15244	430.573	283	552	171368	63.437	4.15244	0	px	Intensity	1.37871
Merged	6515.05	4453.9	4061.8	-3919.5	301	300	122.223	96	168	36667	11.731	4.15244	483.28	239	829	144984	190.791	4.15244	339.197	221	545	101759	73.9429	4.15244	0	px	Intensity	1.37453
Merged	6515.05	4453.9	4061.8	-3919.5	33	476	110.011	95	151	52365	6.62499	4.15244	215.695	160	262	102671	17.0742	4.15244	371.08	247	529	176634	66.3863	4.15244	0	px	Intensity	1.3726
Merged	6515.05	4453.9	4061.8	-3919.5	360	371	116.66	98	160	43281	9.72459	4.15244	298.992	175	460	110926	63.7109	4.15244	302.938	184	527	112390	87.7334	4.15244	0	px	Intensity	1.3715
Merged	6515.05	4453.9	4061.8	-3919.5	135	1238	115.221	84	158	142644	8.17705	4.15244	277.323	198	382	343326	31.3768	4.15244	431.678	264	725	534417	69.7755	4.15244	0	px	Intensity	1.37127
Merged	6515.05	4453.9	4061.8	-3919.5	38	1552	109.68	93	150	170224	5.66056	4.15244	229.631	173	304	356388	19.2913	4.15244	389.111	178	1106	603900	151.21	4.15244	0	px	Intensity	1.36761
Merged	6515.05	4453.9	4061.8	-3919.5	285	390	109.718	95	150	42790	6.5191	4.15244	229.182	170	288	89381	21.0768	4.15244	308.159	171	545	120182	97.8058	4.15244	0	px	Intensity	1.36714
Merged	6515.05	4453.9	4061.8	-3919.5	326	464	109.886	98	150	50987	6.68321	4.15244	220.448	164	286	102288	19.7224	4.15244	409.584	233	569	190047	61.9705	4.15244	0	px	Intensity	1.36505
Merged	6515.05	4453.9	4061.8	-3919.5	403	813	110.772	96	151	90058	6.06451	4.15244	280.961	179	422	228421	47.3203	4.15244	401.886	255	569	326733	62.9479	4.15244	0	px	Intensity	1.36315
Merged	6515.05	4453.9	4061.8	-3919.5	424	519	109.468	92	149	56814	6.42179	4.15244	249.139	172	331	129303	27.8184	4.15244	305.503	174	541	158556	87.9215	4.15244	0	px	Intensity	1.36113
Merged	6515.05	4453.9	4061.8	-3919.5	143	719	114.661	96	156	82441	9.14515	4.15244	236.592	166	304	170110	22.5007	4.15244	350.599	191	569	252081	84.5928	4.15244	0	px	Intensity	1.36054
Merged	6515.05	4453.9	4061.8	-3919.5	219	1265	111.825	87	152	141459	7.95209	4.15244	247.142	173	363	312635	34.016	4.15244	369.496	232	563	467413	71.5106	4.15244	0	px	Intensity	1.35926
Merged	6515.05	4453.9	4061.8	-3919.5	55	497	112.626	97	153	55975	6.96752	4.15244	263.551	183	367	130985	39.9086	4.15244	328.344	189	544	163187	83.0357	4.15244	0	px	Intensity	1.35848
Merged	6515.05	4453.9	4061.8	-3919.5	323	495	120.263	97	163	59530	11.2776	4.15244	440.614	213	765	218104	133.709	4.15244	414.404	254	575	205130	67.6594	4.15244	0	px	Intensity	1.35537
Merged	6515.05	4453.9	4061.8	-3919.5	313	850	128.755	94	174	109442	14.5725	4.15244	508.419	216	942	432156	205.463	4.15244	380.173	245	588	323147	65.4082	4.15244	0	px	Intensity	1.3514
Merged	6515.05	4453.9	4061.8	-3919.5	336	506	111.808	88	151	56575	7.83341	4.15244	248.824	181	353	125905	30.7145	4.15244	313.368	201	564	158564	79.3713	4.15244	0	px	Intensity	1.35053
Merged	6515.05	4453.9	4061.8	-3919.5	390	1074	114.147	82	154	122594	7.34669	4.15244	305.435	207	412	328037	39.6371	4.15244	378.698	169	798	406722	90.6087	4.15244	0	px	Intensity	1.34914
Merged	6515.05	4453.9	4061.8	-3919.5	195	745	118.894	96	160	88576	8.94457	4.15244	370.685	215	571	276160	94.0147	4.15244	322.573	207	535	240317	72.0826	4.15244	0	px	Intensity	1.34574
Merged	6515.05	4453.9	4061.8	-3919.5	53	897	111.514	72	150	100028	6.67225	4.15244	256.336	189	362	229933	28.1449	4.15244	368.027	210	525	330120	79.4225	4.15244	0	px	Intensity	1.34512
Merged	6515.05	4453.9	4061.8	-3919.5	54	1635	116.057	81	156	189754	8.76544	4.15244	288.689	172	443	472007	55.5885	4.15244	346.958	181	665	567276	86.7035	4.15244	0	px	Intensity	1.34416
Merged	6515.05	4453.9	4061.8	-3919.5	49	492	113.089	84	152	55640	7.3964	4.15244	257.703	182	328	126790	27.1172	4.15244	317.805	204	559	156360	85.84	4.15244	0	px	Intensity	1.34407
Merged	6515.05	4453.9	4061.8	-3919.5	144	868	119.069	78	160	103352	10.449	4.15244	417.729	187	888	362589	159.284	4.15244	346.963	217	537	301164	67.4885	4.15244	0	px	Intensity	1.34376
Merged	6515.05	4453.9	4061.8	-3919.5	1	46529	107.259	65	144	4990650	4.4787	4.15244	202.152	132	270	9405938	14.1341	4.15244	550.646	427	677	25620992	32.11	4.15244	0	px	Intensity	1.34255
Merged	6515.05	4453.9	4061.8	-3919.5	464	1084	116.321	93	156	126092	9.30369	4.15244	384.931	204	754	417265	147.989	4.15244	397.493	242	564	430882	64.9485	4.15244	0	px	Intensity	1.34112
Merged	6515.05	4453.9	4061.8	-3919.5	103	719	112.682	90	151	81018	7.66753	4.15244	265.541	181	429	190924	60.9133	4.15244	370.715	224	560	266544	79.6294	4.15244	0	px	Intensity	1.34006
Merged	6515.05	4453.9	4061.8	-3919.5	395	996	116.449	84	156	115983	8.77164	4.15244	281.432	202	400	280306	43.9793	4.15244	364.578	171	571	363120	85.9034	4.15244	0	px	Intensity	1.33964
Merged	6515.05	4453.9	4061.8	-3919.5	463	700	115.714	67	155	81000	9.51394	4.15244	326.883	204	611	228818	70.3902	4.15244	483.154	283	892	338208	118.276	4.15244	0	px	Intensity	1.33951
Merged	6515.05	4453.9	4061.8	-3919.5	26	507	116.475	95	156	59053	9.26946	4.15244	365.596	218	819	185357	96.1237	4.15244	316.552	179	535	160492	87.4175	4.15244	0	px	Intensity	1.33934
Merged	6515.05	4453.9	4061.8	-3919.5	42	926	112.123	88	150	103826	7.85951	4.15244	244.302	177	339	226224	23.2567	4.15244	329.397	184	560	305022	88.128	4.15244	0	px	Intensity	1.33782
Merged	6515.05	4453.9	4061.8	-3919.5	475	749	112.872	93	151	84541	7.5601	4.15244	330.633	195	479	247644	61.4892	4.15244	299.972	175	563	224679	78.4484	4.15244	0	px	Intensity	1.3378
Merged	6515.05	4453.9	4061.8	-3919.5	86	572	107.671	94	144	61588	6.13893	4.15244	196.545	158	237	112424	13.6103	4.15244	330.724	173	555	189174	97.5754	4.15244	0	px	Intensity	1.3374
Merged	6515.05	4453.9	4061.8	-3919.5	98	418	119.069	99	159	49771	9.72179	4.15244	368.854	224	532	154181	70.8984	4.15244	310.667	191	558	129859	83.8038	4.15244	0	px	Intensity	1.33536
Merged	6515.05	4453.9	4061.8	-3919.5	21	533	109.403	90	146	58312	5.93685	4.15244	235.644	184	298	125598	19.1339	4.15244	326.771	200	563	174169	80.9743	4.15244	0	px	Intensity	1.33451
Merged	6515.05	4453.9	4061.8	-3919.5	154	504	110.337	93	147	55610	5.90969	4.15244	218.468	176	261	110108	15.9389	4.15244	359.708	225	521	181293	71.0627	4.15244	0	px	Intensity	1.33228
Merged	6515.05	4453.9	4061.8	-3919.5	312	627	113.348	88	151	71069	7.69704	4.15244	297.129	176	437	186300	50.7586	4.15244	383.694	206	542	240576	72.8128	4.15244	0	px	Intensity	1.33218
Merged	6515.05	4453.9	4061.8	-3919.5	430	1063	114.849	94	153	122085	8.47229	4.15244	395.29	209	635	420193	106.378	4.15244	390.418	243	560	415014	67.0549	4.15244	0	px	Intensity	1.33218
Merged	6515.05	4453.9	4061.8	-3919.5	332	1271	110.402	72	147	140321	5.91149	4.15244	238.038	169	383	302546	31.5775	4.15244	331.322	186	587	421110	88.4548	4.15244	0	px	Intensity	1.3315
Merged	6515.05	4453.9	4061.8	-3919.5	22	719	111.184	90	148	79941	7.12903	4.15244	301.019	181	509	216433	75.0397	4.15244	377.414	249	566	271361	65.7294	4.15244	0	px	Intensity	1.33113
Merged	6515.05	4453.9	4061.8	-3919.5	358	649	109.98	98	146	71377	5.83756	4.15244	222.709	163	305	144538	22.6166	4.15244	316.544	173	548	205437	91.1908	4.15244	0	px	Intensity	1.32751
Merged	6515.05	4453.9	4061.8	-3919.5	318	904	113.008	90	150	102159	7.25382	4.15244	293.899	210	420	265685	35.1604	4.15244	366.554	219	581	331365	73.5196	4.15244	0	px	Intensity	1.32734
Merged	6515.05	4453.9	4061.8	-3919.5	173	1124	110.852	86	147	124598	6.40848	4.15244	263.48	187	347	296151	28.2037	4.15244	375.583	231	575	422155	70.0589	4.15244	0	px	Intensity	1.32609
Merged	6515.05	4453.9	4061.8	-3919.5	166	772	113.157	84	150	87357	6.55793	4.15244	266.999	196	346	206123	33.0118	4.15244	412.929	269	578	318781	63.8606	4.15244	0	px	Intensity	1.32559
Merged	6515.05	4453.9	4061.8	-3919.5	96	388	110.91	90	147	43033	6.78328	4.15244	267.698	188	373	103867	36.9448	4.15244	373.83	277	541	145046	64.1508	4.15244	0	px	Intensity	1.3254
Merged	6515.05	4453.9	4061.8	-3919.5	356	835	117.036	91	155	97725	8.90854	4.15244	328.79	208	500	274540	57.8099	4.15244	431.545	226	566	360340	64.5123	4.15244	0	px	Intensity	1.32438
Merged	6515.05	4453.9	4061.8	-3919.5	306	1127	111.232	88	147	125359	6.92352	4.15244	238.236	167	318	268492	25.8361	4.15244	315.516	169	582	355587	87.3416	4.15244	0	px	Intensity	1.32156
Merged	6515.05	4453.9	4061.8	-3919.5	68	494	111.263	97	147	54964	5.98799	4.15244	252.486	204	303	124728	16.7266	4.15244	310.168	179	553	153223	95.8141	4.15244	0	px	Intensity	1.32119
Merged	6515.05	4453.9	4061.8	-3919.5	41	958	109.843	95	145	105230	5.76861	4.15244	231.347	179	300	221630	20.3669	4.15244	382.85	247	549	366770	63.9571	4.15244	0	px	Intensity	1.32006
Merged	6515.05	4453.9	4061.8	-3919.5	357	415	109.118	97	144	45284	5.73531	4.15244	222.805	178	281	92464	17.2075	4.15244	356.441	218	537	147923	77.8095	4.15244	0	px	Intensity	1.31967
Merged	6515.05	4453.9	4061.8	-3919.5	151	558	113.685	94	150	63436	7.74724	4.15244	250.918	183	308	140012	20.464	4.15244	368.19	243	562	205450	67.9248	4.15244	0	px	Intensity	1.31944
Merged	6515.05	4453.9	4061.8	-3919.5	44	1687	113.141	82	149	190869	7.22749	4.15244	291.148	201	381	491166	30.6653	4.15244	368.02	182	1070	620849	138.416	4.15244	0	px	Intensity	1.31694
Merged	6515.05	4453.9	4061.8	-3919.5	238	568	113.317	83	149	64364	6.84445	4.15244	301.637	200	426	171330	57.2719	4.15244	316.641	203	539	179852	78.6355	4.15244	0	px	Intensity	1.3149
Merged	6515.05	4453.9	4061.8	-3919.5	361	2466	111.914	92	147	275981	6.76736	4.15244	293.703	171	470	724271	56.2977	4.15244	397.761	244	583	980879	65.4565	4.15244	0	px	Intensity	1.3135
Merged	6515.05	4453.9	4061.8	-3919.5	208	514	112.179	97	147	57660	6.40541	4.15244	253.018	174	316	130051	27.6319	4.15244	376.272	250	530	193404	65.2418	4.15244	0	px	Intensity	1.31041
Merged	6515.05	4453.9	4061.8	-3919.5	177	679	120.704	86	158	81958	11.6714	4.15244	552.993	230	1011	375482	185.853	4.15244	368.91	204	560	250490	84.0752	4.15244	0	px	Intensity	1.30899
Merged	6515.05	4453.9	4061.8	-3919.5	134	378	119.952	96	157	45342	8.88357	4.15244	434.603	228	613	164280	89.6482	4.15244	365.368	244	515	138109	64.9657	4.15244	0	px	Intensity	1.30885
Merged	6515.05	4453.9	4061.8	-3919.5	399	1317	113.856	87	149	149949	7.23315	4.15244	280.26	178	385	369103	37.0592	4.15244	385.995	182	1072	508355	130.779	4.15244	0	px	Intensity	1.30866
Merged	6515.05	4453.9	4061.8	-3919.5	124	934	112.481	91	147	105057	7.19332	4.15244	321.259	191	481	300056	65.3333	4.15244	346.096	186	562	323254	87.2742	4.15244	0	px	Intensity	1.30689
Merged	6515.05	4453.9	4061.8	-3919.5	398	398	108.789	95	142	43298	5.45811	4.15244	217.05	170	261	86386	15.6913	4.15244	388.181	265	544	154496	66.5926	4.15244	0	px	Intensity	1.30528
Merged	6515.05	4453.9	4061.8	-3919.5	366	757	120.309	98	157	91074	9.31347	4.15244	346.984	238	468	262667	50.4211	4.15244	436.453	282	665	330395	60.5141	4.15244	0	px	Intensity	1.30497
Merged	6515.05	4453.9	4061.8	-3919.5	215	376	114.346	90	149	42994	8.99185	4.15244	231.66	158	301	87104	26.9873	4.15244	409.566	283	553	153997	64.2586	4.15244	0	px	Intensity	1.30307
Merged	6515.05	4453.9	4061.8	-3919.5	314	1759	110.597	93	144	194540	6.42746	4.15244	257.314	188	376	452616	28.3495	4.15244	384.312	226	572	676004	68.9031	4.15244	0	px	Intensity	1.30203
Merged	6515.05	4453.9	4061.8	-3919.5	126	785	108.397	85	141	85092	5.28004	4.15244	226.904	163	295	178120	25.4068	4.15244	341.237	180	584	267871	91.0246	4.15244	0	px	Intensity	1.30077
Merged	6515.05	4453.9	4061.8	-3919.5	200	519	106.254	95	138	55146	4.50589	4.15244	197.813	153	247	102665	13.9124	4.15244	334.301	171	579	173502	99.7634	4.15244	0	px	Intensity	1.29877
Merged	6515.05	4453.9	4061.8	-3919.5	118	634	117.12	63	152	74254	8.15519	4.15244	344.547	250	489	218443	45.8432	4.15244	365.039	235	555	231435	79.7211	4.15244	0	px	Intensity	1.29782
Merged	6515.05	4453.9	4061.8	-3919.5	253	204	127.216	108	165	25952	9.53474	4.15244	419.451	345	511	85568	33.9153	4.15244	407.475	232	520	83125	61.8605	4.15244	0	px	Intensity	1.29701
Merged	6515.05	4453.9	4061.8	-3919.5	362	331	114.136	94	148	37779	8.41283	4.15244	378.698	177	614	125349	122.449	4.15244	371.937	242	570	123111	73.5555	4.15244	0	px	Intensity	1.2967
Merged	6515.05	4453.9	4061.8	-3919.5	388	421	111.093	78	144	46770	7.2078	4.15244	214.544	158	278	90323	17.3451	4.15244	300.342	181	562	126444	93.8248	4.15244	0	px	Intensity	1.29622
Merged	6515.05	4453.9	4061.8	-3919.5	108	1166	115.015	91	149	134108	7.73144	4.15244	280.569	207	392	327144	34.8027	4.15244	368.532	221	575	429708	77.4385	4.15244	0	px	Intensity	1.29548
Merged	6515.05	4453.9	4061.8	-3919.5	327	558	119.649	89	155	66764	9.52197	4.15244	371.188	222	591	207123	95.1404	4.15244	304.276	191	534	169786	83.1682	4.15244	0	px	Intensity	1.29546
Merged	6515.05	4453.9	4061.8	-3919.5	109	238	115.055	95	149	27383	8.13157	4.15244	298.546	240	378	71054	23.7408	4.15244	374.832	229	528	89210	74.1237	4.15244	0	px	Intensity	1.29504
Merged	6515.05	4453.9	4061.8	-3919.5	283	1004	112.761	96	146	113212	7.28627	4.15244	330.439	190	604	331761	109.936	4.15244	367.814	224	585	369285	75.0436	4.15244	0	px	Intensity	1.29477
Merged	6515.05	4453.9	4061.8	-3919.5	445	386	111.262	83	144	42947	7.01594	4.15244	244.793	180	309	94490	23.8964	4.15244	299.984	176	553	115794	96.6841	4.15244	0	px	Intensity	1.29425
Merged	6515.05	4453.9	4061.8	-3919.5	59	644	108.21	91	140	69687	5.31774	4.15244	226.797	164	290	146057	22.8686	4.15244	372.051	226	556	239601	70.1243	4.15244	0	px	Intensity	1.29379
Merged	6515.05	4453.9	4061.8	-3919.5	107	125	125.248	102	162	15656	9.83083	4.15244	433.464	317	563	54183	56.5228	4.15244	390.376	246	523	48797	70.4024	4.15244	0	px	Intensity	1.29343
Merged	6515.05	4453.9	4061.8	-3919.5	196	364	115.291	95	149	41966	8.79644	4.15244	281.745	205	481	102555	49.4208	4.15244	326.239	178	543	118751	91.7799	4.15244	0	px	Intensity	1.29238
Merged	6515.05	4453.9	4061.8	-3919.5	23	1157	110.685	70	143	128063	6.55797	4.15244	269.544	187	376	311862	34.1185	4.15244	371.315	174	1051	429612	143.314	4.15244	0	px	Intensity	1.29195
Merged	6515.05	4453.9	4061.8	-3919.5	105	524	108.385	91	140	56794	5.55952	4.15244	246.063	167	319	128937	25.6139	4.15244	327.786	176	561	171760	100.968	4.15244	0	px	Intensity	1.29169
Merged	6515.05	4453.9	4061.8	-3919.5	97	439	110.768	89	143	48627	5.91068	4.15244	252.749	178	322	110957	24.4768	4.15244	322.542	202	517	141596	79.7817	4.15244	0	px	Intensity	1.29099
Merged	6515.05	4453.9	4061.8	-3919.5	364	414	111.664	97	144	46229	6.19048	4.15244	230.903	182	299	95594	21.6667	4.15244	328.406	215	542	135960	77.3762	4.15244	0	px	Intensity	1.28958
Merged	6515.05	4453.9	4061.8	-3919.5	339	394	116.32	100	150	45830	7.71799	4.15244	317.206	211	412	124979	45.8188	4.15244	305.437	193	519	120342	82.1892	4.15244	0	px	Intensity	1.28955
Merged	6515.05	4453.9	4061.8	-3919.5	170	912	112.462	97	145	102565	6.60215	4.15244	251.629	176	389	229486	36.5179	4.15244	328.566	191	541	299652	70.3324	4.15244	0	px	Intensity	1.28933
Merged	6515.05	4453.9	4061.8	-3919.5	441	827	114.034	86	147	94306	8.45892	4.15244	330.18	201	535	273059	72.599	4.15244	405.314	259	562	335195	66.666	4.15244	0	px	Intensity	1.28909
Merged	6515.05	4453.9	4061.8	-3919.5	122	810	108.638	91	140	87997	5.32956	4.15244	240.585	179	322	194874	25.2056	4.15244	334.059	187	583	270588	87.6633	4.15244	0	px	Intensity	1.28868
Merged	6515.05	4453.9	4061.8	-3919.5	140	729	111.823	76	144	81519	6.74791	4.15244	260.241	170	331	189716	26.2183	4.15244	322.971	194	534	235446	78.1494	4.15244	0	px	Intensity	1.28775
Merged	6515.05	4453.9	4061.8	-3919.5	39	726	109.494	89	141	79493	6.50634	4.15244	278.242	164	414	202004	52.1616	4.15244	399.114	255	572	289757	63.2554	4.15244	0	px	Intensity	1.28774
Merged	6515.05	4453.9	4061.8	-3919.5	235	299	119.625	103	154	35768	8.28701	4.15244	398.151	295	488	119047	36.9445	4.15244	364.813	232	519	109079	65.6508	4.15244	0	px	Intensity	1.28735
Merged	6515.05	4453.9	4061.8	-3919.5	305	358	110.405	97	142	39525	7.32461	4.15244	217.193	175	280	77755	18.0502	4.15244	309.849	166	553	110926	98.085	4.15244	0	px	Intensity	1.28617
Merged	6515.05	4453.9	4061.8	-3919.5	428	425	116.685	99	150	49591	8.45256	4.15244	377.219	239	559	160318	84.5521	4.15244	414.64	260	549	176222	59.2394	4.15244	0	px	Intensity	1.28552
Merged	6515.05	4453.9	4061.8	-3919.5	95	343	117.539	76	151	40316	8.06044	4.15244	337.732	236	409	115842	36.493	4.15244	351.758	191	563	120653	80.8925	4.15244	0	px	Intensity	1.28468
Merged	6515.05	4453.9	4061.8	-3919.5	61	1411	107.423	89	138	151574	4.70265	4.15244	204.51	161	254	288564	14.372	4.15244	501.81	411	610	708054	25.9698	4.15244	0	px	Intensity	1.28464
Merged	6515.05	4453.9	4061.8	-3919.5	333	757	118.406	91	152	89633	8.51384	4.15244	452.369	206	639	342443	76.5402	4.15244	419.587	245	564	317627	62.3353	4.15244	0	px	Intensity	1.28372
Merged	6515.05	4453.9	4061.8	-3919.5	24	305	122.43	84	157	37341	11.8098	4.15244	595.892	279	963	181747	193.504	4.15244	357.682	231	533	109093	73.8985	4.15244	0	px	Intensity	1.28237
Merged	6515.05	4453.9	4061.8	-3919.5	85	2337	113.96	87	146	266325	7.27293	4.15244	295.293	208	499	690100	50.1862	4.15244	400.321	162	1227	935551	179.84	4.15244	0	px	Intensity	1.28115
Merged	6515.05	4453.9	4061.8	-3919.5	17	782	109.385	93	140	85539	5.88581	4.15244	245.642	156	342	192092	36.1462	4.15244	331.835	141	591	259495	98.6047	4.15244	0	px	Intensity	1.27988
Merged	6515.05	4453.9	4061.8	-3919.5	292	309	125.039	95	160	38637	11.4509	4.15244	393.518	247	574	121597	88.0096	4.15244	325.476	193	512	100572	79.137	4.15244	0	px	Intensity	1.2796
Merged	6515.05	4453.9	4061.8	-3919.5	396	602	107.912	92	138	64963	4.9713	4.15244	223.048	158	282	134275	20.7154	4.15244	422.48	259	557	254333	66.9254	4.15244	0	px	Intensity	1.27882
Merged	6515.05	4453.9	4061.8	-3919.5	373	411	113.071	94	144	46472	6.30292	4.15244	269.465	213	324	110750	18.3906	4.15244	408.457	266	570	167876	65.2579	4.15244	0	px	Intensity	1.27354
Merged	6515.05	4453.9	4061.8	-3919.5	114	841	109.945	90	140	92464	5.52279	4.15244	230.088	177	298	193504	21.0002	4.15244	320.187	206	542	269277	75.2441	4.15244	0	px	Intensity	1.27336
Merged	6515.05	4453.9	4061.8	-3919.5	277	994	108.391	92	138	107741	5.16749	4.15244	237.863	175	294	236436	18.7913	4.15244	371.465	241	552	369236	73.4756	4.15244	0	px	Intensity	1.27316
Merged	6515.05	4453.9	4061.8	-3919.5	168	1102	112.32	86	143	123777	6.83994	4.15244	269.236	169	489	296698	62.1548	4.15244	352.842	228	536	388832	64.3791	4.15244	0	px	Intensity	1.27314
Merged	6515.05	4453.9	4061.8	-3919.5	340	487	117.828	94	150	57382	9.33091	4.15244	397.049	204	650	193363	123.04	4.15244	357.421	237	550	174064	84.793	4.15244	0	px	Intensity	1.27305
Merged	6515.05	4453.9	4061.8	-3919.5	367	1228	113.936	83	145	139914	7.52285	4.15244	299.3	201	506	367540	52.6299	4.15244	408.968	247	618	502213	65.9924	4.15244	0	px	Intensity	1.27264
Merged	6515.05	4453.9	4061.8	-3919.5	368	548	115.538	94	147	63315	7.7042	4.15244	333.02	195	486	182495	75.5245	4.15244	350.372	238	528	192004	70.4914	4.15244	0	px	Intensity	1.27231
Merged	6515.05	4453.9	4061.8	-3919.5	79	347	110.948	93	141	38499	6.88258	4.15244	219.144	179	259	76043	14.9909	4.15244	322.83	176	545	112022	103.156	4.15244	0	px	Intensity	1.27086
Merged	6515.05	4453.9	4061.8	-3919.5	115	257	125.121	101	159	32156	10.0382	4.15244	420.984	301	516	108193	50.067	4.15244	370.739	228	529	95280	75.9734	4.15244	0	px	Intensity	1.27077
Merged	6515.05	4453.9	4061.8	-3919.5	132	632	114.241	94	145	72200	7.20396	4.15244	311.712	218	414	197002	35.9234	4.15244	337.984	220	525	213606	70.4492	4.15244	0	px	Intensity	1.26925
Merged	6515.05	4453.9	4061.8	-3919.5	167	461	110.306	96	140	50851	6.46479	4.15244	245.716	176	315	113275	21.9299	4.15244	311.02	171	551	143380	99.3443	4.15244	0	px	Intensity	1.2692
Merged	6515.05	4453.9	4061.8	-3919.5	206	478	111.1	95	141	53106	6.78264	4.15244	223.655	177	285	106907	19.9884	4.15244	376.918	223	561	180167	72.9248	4.15244	0	px	Intensity	1.26912
Merged	6515.05	4453.9	4061.8	-3919.5	193	532	108.741	96	138	57850	5.2146	4.15244	220.836	172	281	117485	16.1141	4.15244	394.553	242	553	209902	63.1615	4.15244	0	px	Intensity	1.26908
Merged	6515.05	4453.9	4061.8	-3919.5	260	161	109.553	99	139	17638	5.92927	4.15244	229.385	183	274	36931	17.7255	4.15244	454.776	319	565	73219	59.0929	4.15244	0	px	Intensity	1.26879
Merged	6515.05	4453.9	4061.8	-3919.5	349	593	110.358	96	140	65442	5.94613	4.15244	216.052	167	263	128119	16.0634	4.15244	360.054	214	562	213512	78.9835	4.15244	0	px	Intensity	1.2686
Merged	6515.05	4453.9	4061.8	-3919.5	298	370	109.603	92	139	40553	6.38087	4.15244	228.703	169	299	84620	24.0753	4.15244	382.746	226	531	141616	74.2108	4.15244	0	px	Intensity	1.26822
Merged	6515.05	4453.9	4061.8	-3919.5	436	693	113.577	95	144	78709	6.96067	4.15244	290.006	209	422	200974	41.2933	4.15244	396.25	240	553	274601	71.4073	4.15244	0	px	Intensity	1.26786
Merged	6515.05	4453.9	4061.8	-3919.5	117	1498	114.48	90	145	171491	7.82362	4.15244	326.26	203	494	488738	59.7096	4.15244	367.075	236	540	549879	64.6035	4.15244	0	px	Intensity	1.2666
Merged	6515.05	4453.9	4061.8	-3919.5	278	756	109.774	90	139	82989	6.1514	4.15244	261.286	180	351	197532	33.9694	4.15244	381.165	254	575	288161	67.273	4.15244	0	px	Intensity	1.26624
Merged	6515.05	4453.9	4061.8	-3919.5	359	655	110.574	95	140	72426	5.6231	4.15244	240.863	195	301	157765	20.4754	4.15244	310.142	183	541	203143	86.7455	4.15244	0	px	Intensity	1.26612
Merged	6515.05	4453.9	4061.8	-3919.5	282	597	107.533	94	136	64197	5.46342	4.15244	205.34	136	250	122588	15.8338	4.15244	439.982	306	581	262669	52.5974	4.15244	0	px	Intensity	1.26473
Merged	6515.05	4453.9	4061.8	-3919.5	270	326	120.994	91	153	39444	10.9484	4.15244	484.169	224	820	157839	183.398	4.15244	350.344	226	555	114212	74.4413	4.15244	0	px	Intensity	1.26453
Merged	6515.05	4453.9	4061.8	-3919.5	120	1168	111.521	82	141	130256	6.3983	4.15244	249.948	180	407	291939	37.5373	4.15244	324.648	163	546	379189	87.9484	4.15244	0	px	Intensity	1.26434
Merged	6515.05	4453.9	4061.8	-3919.5	73	480	111.527	96	141	53533	6.6419	4.15244	226.148	182	279	108551	16.4199	4.15244	317.896	182	545	152590	95.2574	4.15244	0	px	Intensity	1.26427
Merged	6515.05	4453.9	4061.8	-3919.5	387	367	109.992	83	139	40367	6.32974	4.15244	226.147	175	291	82996	21.3499	4.15244	396.082	260	569	145362	72.5576	4.15244	0	px	Intensity	1.26373
Merged	6515.05	4453.9	4061.8	-3919.5	178	564	109.229	85	138	61605	5.54186	4.15244	232.73	174	296	131260	22.8546	4.15244	382.402	233	605	215675	66.9591	4.15244	0	px	Intensity	1.2634
Merged	6515.05	4453.9	4061.8	-3919.5	230	496	112.496	90	142	55798	7.06235	4.15244	278.915	187	400	138342	51.0667	4.15244	377.135	232	561	187059	75.7556	4.15244	0	px	Intensity	1.26227
Merged	6515.05	4453.9	4061.8	-3919.5	83	566	110.198	90	139	62372	6.0328	4.15244	231.392	174	294	130968	21.4498	4.15244	337.436	211	575	190989	71.159	4.15244	0	px	Intensity	1.26137
Merged	6515.05	4453.9	4061.8	-3919.5	286	442	112.708	94	142	49817	7.47771	4.15244	321.762	192	529	142219	85.941	4.15244	397.387	248	552	175645	65.3377	4.15244	0	px	Intensity	1.25989
Merged	6515.05	4453.9	4061.8	-3919.5	28	530	108.796	93	137	57662	5.77017	4.15244	204.591	150	269	108433	15.0832	4.15244	332.513	194	539	176232	82.0772	4.15244	0	px	Intensity	1.25923
Merged	6515.05	4453.9	4061.8	-3919.5	299	469	112.778	80	142	52893	6.93283	4.15244	280.512	203	376	131560	38.3184	4.15244	323.774	192	553	151850	83.5725	4.15244	0	px	Intensity	1.25911
Merged	6515.05	4453.9	4061.8	-3919.5	35	602	108.844	90	137	65524	5.31926	4.15244	216.827	169	269	130530	16.0485	4.15244	311.444	177	559	187489	91.0467	4.15244	0	px	Intensity	1.25868
Merged	6515.05	4453.9	4061.8	-3919.5	401	502	110.528	98	139	55485	5.84668	4.15244	267.506	185	353	134288	40.8066	4.15244	373.124	208	543	187308	80.8228	4.15244	0	px	Intensity	1.2576
Merged	6515.05	4453.9	4061.8	-3919.5	316	519	113.711	77	143	59016	7.0858	4.15244	318.811	214	430	165463	49.7166	4.15244	328.778	206	530	170636	80.6229	4.15244	0	px	Intensity	1.25757
Merged	6515.05	4453.9	4061.8	-3919.5	311	187	151.909	113	191	28407	14.2768	4.15244	869.535	467	1176	162603	159.973	4.15244	383.856	245	547	71781	67.0456	4.15244	0	px	Intensity	1.25733
Merged	6515.05	4453.9	4061.8	-3919.5	119	441	110.556	86	139	48755	5.98445	4.15244	267.873	184	356	118132	34.0561	4.15244	400.927	266	560	176809	62.2433	4.15244	0	px	Intensity	1.25729
Merged	6515.05	4453.9	4061.8	-3919.5	152	1156	113.858	84	143	131620	7.29929	4.15244	324.709	187	511	375364	61.0016	4.15244	334.729	210	586	386947	69.7902	4.15244	0	px	Intensity	1.25595
Merged	6515.05	4453.9	4061.8	-3919.5	141	264	123.413	84	155	32581	11.166	4.15244	587.148	297	974	155007	170.052	4.15244	375.955	275	547	99252	66.9281	4.15244	0	px	Intensity	1.25595
Merged	6515.05	4453.9	4061.8	-3919.5	351	788	112.296	77	141	88489	6.98874	4.15244	285.331	187	456	224841	60.8099	4.15244	308.362	173	545	242989	84.6936	4.15244	0	px	Intensity	1.25561
Merged	6515.05	4453.9	4061.8	-3919.5	176	743	109.91	92	138	81663	5.73799	4.15244	258.766	162	358	192263	33.1205	4.15244	313.735	165	571	233105	91.8018	4.15244	0	px	Intensity	1.25557
Merged	6515.05	4453.9	4061.8	-3919.5	442	947	113.995	89	143	107953	7.46571	4.15244	322.453	212	433	305363	42.3977	4.15244	372.677	176	550	352925	78.5144	4.15244	0	px	Intensity	1.25444
Merged	6515.05	4453.9	4061.8	-3919.5	32	704	111.628	88	140	78586	6.69228	4.15244	296.366	211	385	208642	36.9937	4.15244	322.462	177	555	227013	94.2908	4.15244	0	px	Intensity	1.25417
Merged	6515.05	4453.9	4061.8	-3919.5	480	412	109.248	96	137	45010	5.71249	4.15244	266.495	181	375	109796	45.7131	4.15244	395.243	243	551	162840	67.1643	4.15244	0	px	Intensity	1.25403
Merged	6515.05	4453.9	4061.8	-3919.5	226	521	112.451	96	141	58587	6.49112	4.15244	299.543	204	398	156062	45.7955	4.15244	358.192	259	544	186618	63.745	4.15244	0	px	Intensity	1.25388
Merged	6515.05	4453.9	4061.8	-3919.5	273	900	121.253	92	152	109128	8.87178	4.15244	453.327	280	668	407994	78.5837	4.15244	344.608	188	575	310147	75.5189	4.15244	0	px	Intensity	1.25357
Merged	6515.05	4453.9	4061.8	-3919.5	46	266	107.726	92	135	28655	5.02822	4.15244	202.917	168	241	53976	14.558	4.15244	488.402	405	578	129915	32.0415	4.15244	0	px	Intensity	1.25318
Merged	6515.05	4453.9	4061.8	-3919.5	374	690	110.152	85	138	76005	6.28831	4.15244	267.103	178	398	184301	35.5768	4.15244	376.906	209	549	260065	74.7049	4.15244	0	px	Intensity	1.25281
Merged	6515.05	4453.9	4061.8	-3919.5	423	404	110.218	92	138	44528	6.26087	4.15244	273.082	174	383	110325	45.4802	4.15244	380.324	236	559	153651	73.2138	4.15244	0	px	Intensity	1.25207
Merged	6515.05	4453.9	4061.8	-3919.5	29	1019	108.652	86	136	110716	5.27058	4.15244	216.734	170	272	220852	16.8581	4.15244	370.529	253	558	377569	65.2342	4.15244	0	px	Intensity	1.25171
Merged	6515.05	4453.9	4061.8	-3919.5	130	820	117.534	74	147	96378	8.32388	4.15244	356.568	206	550	292386	61.4778	4.15244	411.912	266	560	337768	60.9006	4.15244	0	px	Intensity	1.2507
Merged	6515.05	4453.9	4061.8	-3919.5	80	539	109.564	94	137	59055	5.92361	4.15244	199.378	154	239	107465	13.8573	4.15244	306.182	146	569	165032	99.9933	4.15244	0	px	Intensity	1.25041
Merged	6515.05	4453.9	4061.8	-3919.5	319	505	116.147	92	145	58654	7.66951	4.15244	327.325	215	446	165299	49.2474	4.15244	327.941	201	516	165610	78.2554	4.15244	0	px	Intensity	1.24842
Merged	6515.05	4453.9	4061.8	-3919.5	113	415	115.453	95	144	47913	7.38715	4.15244	327.966	221	455	136106	45.6523	4.15244	357.573	232	522	148393	69.3983	4.15244	0	px	Intensity	1.24726
Merged	6515.05	4453.9	4061.8	-3919.5	343	384	109.87	98	137	42190	5.86667	4.15244	222.234	177	280	85338	15.674	4.15244	408.518	266	547	156871	65.9088	4.15244	0	px	Intensity	1.24693
Merged	6515.05	4453.9	4061.8	-3919.5	353	522	109.927	95	137	57382	6.08229	4.15244	220.852	181	283	115285	15.9784	4.15244	301.084	184	559	157166	91.5064	4.15244	0	px	Intensity	1.24628
Merged	6515.05	4453.9	4061.8	-3919.5	125	384	117.344	94	146	45060	8.52259	4.15244	366.078	210	564	140574	88.6707	4.15244	357.503	252	542	137281	69.4956	4.15244	0	px	Intensity	1.24421
Merged	6515.05	4453.9	4061.8	-3919.5	127	369	110.951	96	138	40941	6.91289	4.15244	231.902	162	288	85572	22.6701	4.15244	307.862	158	519	113601	90.0994	4.15244	0	px	Intensity	1.24379
Merged	6515.05	4453.9	4061.8	-3919.5	198	393	110.954	91	138	43605	7.07251	4.15244	210.117	170	254	82576	15.0464	4.15244	405.115	232	571	159210	68.9762	4.15244	0	px	Intensity	1.24376
Merged	6515.05	4453.9	4061.8	-3919.5	255	371	111.067	71	138	41206	6.654	4.15244	238.765	179	298	88582	23.3002	4.15244	349.113	234	549	129521	76.7207	4.15244	0	px	Intensity	1.24249
Merged	6515.05	4453.9	4061.8	-3919.5	272	536	111.129	67	138	59565	6.47338	4.15244	250.177	191	326	134095	28.9253	4.15244	317.625	201	536	170247	82.1431	4.15244	0	px	Intensity	1.2418
Merged	6515.05	4453.9	4061.8	-3919.5	99	998	117.765	94	146	117529	8.03977	4.15244	312.037	207	510	311413	63.995	4.15244	383.388	179	993	382621	131.563	4.15244	0	px	Intensity	1.23976
Merged	6515.05	4453.9	4061.8	-3919.5	300	506	109.789	95	136	55553	5.95511	4.15244	217.879	172	290	110247	17.6783	4.15244	403.893	249	567	204370	62.9105	4.15244	0	px	Intensity	1.23874
Merged	6515.05	4453.9	4061.8	-3919.5	328	466	113.062	91	140	52687	7.29	4.15244	284.009	190	379	132348	41.2791	4.15244	298.232	175	552	138976	101.454	4.15244	0	px	Intensity	1.23826
Merged	6515.05	4453.9	4061.8	-3919.5	52	189	116.556	98	144	22029	7.36185	4.15244	351.116	280	416	66361	28.9297	4.15244	395.291	250	534	74710	70.0938	4.15244	0	px	Intensity	1.23546
Merged	6515.05	4453.9	4061.8	-3919.5	221	564	108.482	94	134	61184	5.38286	4.15244	231.764	175	282	130715	17.2237	4.15244	398.043	256	547	224496	70.4706	4.15244	0	px	Intensity	1.23522
Merged	6515.05	4453.9	4061.8	-3919.5	228	653	113.357	75	140	74022	6.76501	4.15244	258.568	194	356	168845	29.2949	4.15244	347.207	176	572	226726	87.5014	4.15244	0	px	Intensity	1.23504
Merged	6515.05	4453.9	4061.8	-3919.5	263	704	111.064	82	137	78189	6.51653	4.15244	216.589	171	263	152479	15.5053	4.15244	407.794	270	577	287087	60.7721	4.15244	0	px	Intensity	1.23352
Merged	6515.05	4453.9	4061.8	-3919.5	158	316	113.671	86	140	35920	7.40442	4.15244	276.582	211	340	87400	23.6812	4.15244	390.25	274	550	123319	62.0493	4.15244	0	px	Intensity	1.23163
Merged	6515.05	4453.9	4061.8	-3919.5	354	482	112.137	81	138	54050	7.23355	4.15244	251.807	196	317	121371	22.5754	4.15244	311.427	168	542	150108	100.182	4.15244	0	px	Intensity	1.23064
Merged	6515.05	4453.9	4061.8	-3919.5	229	1247	111.362	89	137	138869	6.56991	4.15244	254.36	173	379	317187	45.4239	4.15244	426.264	284	658	531551	62.7831	4.15244	0	px	Intensity	1.23022
Merged	6515.05	4453.9	4061.8	-3919.5	295	638	111.389	86	137	71066	6.17218	4.15244	246.636	188	307	157354	18.8551	4.15244	323.818	209	518	206596	78.5654	4.15244	0	px	Intensity	1.22993
Merged	6515.05	4453.9	4061.8	-3919.5	91	322	116.267	87	143	37438	7.37302	4.15244	361.78	221	491	116493	54.6473	4.15244	322.488	178	576	103841	97.6404	4.15244	0	px	Intensity	1.22993
Merged	6515.05	4453.9	4061.8	-3919.5	93	539	110.686	83	136	59660	6.12554	4.15244	255.922	182	333	137942	31.6311	4.15244	389.184	270	602	209770	66.0262	4.15244	0	px	Intensity	1.2287
Merged	6515.05	4453.9	4061.8	-3919.5	179	403	109.878	95	135	44281	5.73329	4.15244	219.412	171	268	88423	15.9612	4.15244	340.603	238	557	137263	70.5412	4.15244	0	px	Intensity	1.22863
Merged	6515.05	4453.9	4061.8	-3919.5	427	428	113.963	91	140	48776	7.07339	4.15244	318.276	229	408	136222	31.482	4.15244	397.937	243	550	170317	66.3617	4.15244	0	px	Intensity	1.22847
Merged	6515.05	4453.9	4061.8	-3919.5	163	828	109.22	85	134	90434	5.75298	4.15244	234.978	152	300	194562	21.6935	4.15244	381.651	217	572	316007	76.8073	4.15244	0	px	Intensity	1.22688
Merged	6515.05	4453.9	4061.8	-3919.5	438	1022	106.906	90	131	109258	4.47115	4.15244	200.526	157	248	204938	14.2964	4.15244	505.162	394	613	516276	27.3211	4.15244	0	px	Intensity	1.22537
Merged	6515.05	4453.9	4061.8	-3919.5	391	406	111.803	84	137	45392	6.55781	4.15244	274.212	206	346	111330	30.0855	4.15244	344.249	222	533	139765	75.4957	4.15244	0	px	Intensity	1.22537
Merged	6515.05	4453.9	4061.8	-3919.5	69	673	109.398	89	134	73625	5.33101	4.15244	231.908	172	297	156074	19.9877	4.15244	335.422	179	578	225739	78.3725	4.15244	0	px	Intensity	1.22488
Merged	6515.05	4453.9	4061.8	-3919.5	71	503	112.815	96	138	56746	6.49946	4.15244	301.575	209	393	151692	36.2742	4.15244	313.795	179	519	157839	85.2841	4.15244	0	px	Intensity	1.22324
Merged	6515.05	4453.9	4061.8	-3919.5	155	616	108.817	93	133	67031	5.52629	4.15244	228.026	178	296	140464	16.8776	4.15244	316.695	140	576	195084	103.186	4.15244	0	px	Intensity	1.22224
Merged	6515.05	4453.9	4061.8	-3919.5	76	469	108.851	76	133	51051	5.73712	4.15244	248.991	166	342	116777	36.4813	4.15244	389.414	240	529	182635	68.7007	4.15244	0	px	Intensity	1.22186
Merged	6515.05	4453.9	4061.8	-3919.5	129	724	110.735	97	135	80172	6.27692	4.15244	262.322	186	365	189921	33.81	4.15244	402.052	265	537	291086	58.5638	4.15244	0	px	Intensity	1.21913
Merged	6515.05	4453.9	4061.8	-3919.5	74	526	120.591	98	147	63431	8.7038	4.15244	425.106	250	581	223606	80.2095	4.15244	305.308	171	544	160592	93.233	4.15244	0	px	Intensity	1.21899
Merged	6515.05	4453.9	4061.8	-3919.5	224	467	110.762	98	135	51726	5.71159	4.15244	243.37	188	293	113654	17.8707	4.15244	307.927	185	540	143802	87.9392	4.15244	0	px	Intensity	1.21883
Merged	6515.05	4453.9	4061.8	-3919.5	15	209	114.923	96	140	24019	8.68686	4.15244	275.641	205	338	57609	21.7	4.15244	384.641	213	550	80390	78.6125	4.15244	0	px	Intensity	1.2182
Merged	6515.05	4453.9	4061.8	-3919.5	16	823	109.269	92	133	89928	6.01205	4.15244	249.756	182	344	205549	27.3626	4.15244	332.371	196	575	273541	76.8068	4.15244	0	px	Intensity	1.21718
Merged	6515.05	4453.9	4061.8	-3919.5	214	394	112.589	96	137	44360	6.76881	4.15244	281.411	200	381	110876	43.3584	4.15244	327.381	205	519	128988	79.3434	4.15244	0	px	Intensity	1.21682
Merged	6515.05	4453.9	4061.8	-3919.5	289	684	112.677	92	137	77071	7.12727	4.15244	265.724	190	353	181755	34.4703	4.15244	335.516	213	519	229493	65.9575	4.15244	0	px	Intensity	1.21587
Merged	6515.05	4453.9	4061.8	-3919.5	184	507	114.333	97	139	57967	7.14655	4.15244	320.213	226	611	162348	44.7505	4.15244	375.264	261	530	190259	59.0803	4.15244	0	px	Intensity	1.21574
Merged	6515.05	4453.9	4061.8	-3919.5	174	115	124.235	106	151	14287	9.17615	4.15244	485.139	365	575	55791	44.3764	4.15244	452.87	370	536	52080	40.2734	4.15244	0	px	Intensity	1.21544
Merged	6515.05	4453.9	4061.8	-3919.5	90	888	111.095	93	135	98652	6.18058	4.15244	257.857	192	355	228977	26.8871	4.15244	313.257	171	548	278172	87.4249	4.15244	0	px	Intensity	1.21518
Merged	6515.05	4453.9	4061.8	-3919.5	254	536	108.638	96	132	58230	5.18427	4.15244	223.108	169	294	119586	19.5753	4.15244	409.312	268	571	219391	60.567	4.15244	0	px	Intensity	1.21504
Merged	6515.05	4453.9	4061.8	-3919.5	378	367	111.954	87	136	41087	6.51669	4.15244	259.193	181	343	95124	32.9578	4.15244	305.986	183	523	112297	85.2022	4.15244	0	px	Intensity	1.21479
Merged	6515.05	4453.9	4061.8	-3919.5	477	538	106.195	95	129	57133	4.41873	4.15244	196.372	158	252	105648	14.4616	4.15244	502.418	427	577	270301	26.6842	4.15244	0	px	Intensity	1.21474
Merged	6515.05	4453.9	4061.8	-3919.5	47	600	111.212	95	135	66727	6.25968	4.15244	233.993	186	298	140396	19.0863	4.15244	324.282	195	522	194569	81.4541	4.15244	0	px	Intensity	1.2139
Merged	6515.05	4453.9	4061.8	-3919.5	43	483	111.234	90	135	53726	6.18944	4.15244	264.308	217	325	127661	18.8237	4.15244	350.884	192	549	169477	82.3526	4.15244	0	px	Intensity	1.21366
Merged	6515.05	4453.9	4061.8	-3919.5	246	673	109.692	74	133	73823	5.58058	4.15244	241.984	172	316	162855	22.574	4.15244	364.3	226	555	245174	72.4267	4.15244	0	px	Intensity	1.21248
Merged	6515.05	4453.9	4061.8	-3919.5	60	422	109.697	94	133	46292	5.54361	4.15244	262.062	183	353	110590	36.8445	4.15244	370.983	233	558	156555	73.3889	4.15244	0	px	Intensity	1.21243
Merged	6515.05	4453.9	4061.8	-3919.5	348	522	110.542	91	134	57703	6.03986	4.15244	273.898	191	373	142975	35.272	4.15244	391.017	236	536	204111	69.6018	4.15244	0	px	Intensity	1.21221
Merged	6515.05	4453.9	4061.8	-3919.5	164	268	108.104	97	131	28972	5.05698	4.15244	205.134	174	257	54976	13.9235	4.15244	357.631	208	541	95845	86.3896	4.15244	0	px	Intensity	1.21179
Merged	6515.05	4453.9	4061.8	-3919.5	211	435	112.324	95	136	48861	6.299	4.15244	293.267	195	395	127571	45.7796	4.15244	358.913	237	552	156127	76.5369	4.15244	0	px	Intensity	1.21078
Merged	6515.05	4453.9	4061.8	-3919.5	207	762	107.567	96	130	81966	4.56922	4.15244	209.295	158	247	159483	14.392	4.15244	494.983	384	597	377177	27.7666	4.15244	0	px	Intensity	1.20855
Merged	6515.05	4453.9	4061.8	-3919.5	34	464	111.935	96	135	51938	6.45486	4.15244	215.733	170	265	100100	17.0669	4.15244	328.091	187	546	152234	83.2667	4.15244	0	px	Intensity	1.20605
Merged	6515.05	4453.9	4061.8	-3919.5	393	383	113.603	96	137	43510	7.17088	4.15244	309.123	200	475	118394	71.745	4.15244	306.82	197	519	117512	83.3272	4.15244	0	px	Intensity	1.20595
Merged	6515.05	4453.9	4061.8	-3919.5	325	405	112.812	89	136	45689	6.587	4.15244	249.753	184	332	101150	28.5424	4.15244	315.677	197	546	127849	85.0215	4.15244	0	px	Intensity	1.20554
Merged	6515.05	4453.9	4061.8	-3919.5	156	352	112.057	89	135	39444	6.58584	4.15244	258.821	199	326	91105	25.668	4.15244	368.835	266	532	129830	61.7296	4.15244	0	px	Intensity	1.20475
Merged	6515.05	4453.9	4061.8	-3919.5	139	608	109.732	90	132	66717	5.57737	4.15244	235.513	182	299	143192	22.0565	4.15244	364.732	246	566	221757	68.6715	4.15244	0	px	Intensity	1.20293
Merged	6515.05	4453.9	4061.8	-3919.5	171	462	110.608	84	133	51101	6.01535	4.15244	255.827	197	335	118192	32.6752	4.15244	314.736	185	540	145408	88.9224	4.15244	0	px	Intensity	1.20244
Merged	6515.05	4453.9	4061.8	-3919.5	212	317	113.17	82	136	35875	6.84919	4.15244	269.246	207	346	85351	27.5426	4.15244	305.65	176	535	96891	98.7336	4.15244	0	px	Intensity	1.20173
Merged	6515.05	4453.9	4061.8	-3919.5	257	116	129.034	101	155	14968	10.1377	4.15244	425.414	335	635	49348	58.3744	4.15244	409.043	250	521	47449	72.042	4.15244	0	px	Intensity	1.20123
Merged	6515.05	4453.9	4061.8	-3919.5	183	423	109.121	82	131	46158	5.22616	4.15244	221.333	174	275	93624	17.4397	4.15244	369.201	256	546	156172	70.9276	4.15244	0	px	Intensity	1.20051
Merged	6515.05	4453.9	4061.8	-3919.5	476	223	109.139	96	131	24338	5.41727	4.15244	249.43	183	306	55623	19.2354	4.15244	301.404	188	518	67213	89.6376	4.15244	0	px	Intensity	1.2003
Merged	6515.05	4453.9	4061.8	-3919.5	310	592	107.652	94	129	63730	4.65366	4.15244	208.1	167	251	123195	14.7364	4.15244	367.164	224	542	217361	78.1221	4.15244	0	px	Intensity	1.19831
Merged	6515.05	4453.9	4061.8	-3919.5	379	373	108.619	95	130	40515	5.58873	4.15244	250.236	177	336	93338	33.5274	4.15244	317.759	142	562	118524	109.921	4.15244	0	px	Intensity	1.19684
Merged	6515.05	4453.9	4061.8	-3919.5	209	999	107.908	92	129	107800	4.75881	4.15244	207.864	159	258	207656	14.7929	4.15244	495.589	410	592	495093	28.6598	4.15244	0	px	Intensity	1.19546
Merged	6515.05	4453.9	4061.8	-3919.5	218	1004	107.944	93	129	108376	4.91909	4.15244	224.975	175	282	225875	17.0125	4.15244	432.545	216	736	434275	79.4493	4.15244	0	px	Intensity	1.19506
Merged	6515.05	4453.9	4061.8	-3919.5	444	870	107.12	94	128	93194	4.35507	4.15244	201.903	161	253	175656	13.4456	4.15244	505.899	427	626	440132	27.984	4.15244	0	px	Intensity	1.19493
Merged	6515.05	4453.9	4061.8	-3919.5	25	151	122.338	98	146	18473	8.81514	4.15244	492.358	383	605	74346	43.7037	4.15244	386.252	253	539	58324	77.9112	4.15244	0	px	Intensity	1.19342
Merged	6515.05	4453.9	4061.8	-3919.5	192	300	111.483	97	133	33445	6.1143	4.15244	244.527	191	301	73358	24.9667	4.15244	369.103	272	533	110731	60.5281	4.15244	0	px	Intensity	1.193
Merged	6515.05	4453.9	4061.8	-3919.5	220	406	107.433	93	128	43618	4.80663	4.15244	204.281	167	239	82938	14.1964	4.15244	437.539	317	578	177641	49.898	4.15244	0	px	Intensity	1.19143
Merged	6515.05	4453.9	4061.8	-3919.5	363	637	109.133	88	130	69518	5.16383	4.15244	219.305	182	276	139697	15.281	4.15244	295.179	179	566	188029	88.5853	4.15244	0	px	Intensity	1.1912
Merged	6515.05	4453.9	4061.8	-3919.5	420	396	111.793	88	133	44270	6.92089	4.15244	299.199	186	380	118483	34.777	4.15244	406.846	247	581	161111	69.977	4.15244	0	px	Intensity	1.1897
Merged	6515.05	4453.9	4061.8	-3919.5	251	479	111.858	97	133	53580	6.07881	4.15244	256.017	191	323	122632	24.5735	4.15244	316.006	184	556	151367	87.6343	4.15244	0	px	Intensity	1.18901
Merged	6515.05	4453.9	4061.8	-3919.5	415	582	108.507	93	129	63151	5.22934	4.15244	219.115	172	274	127525	19.9319	4.15244	376.94	220	548	219379	73.9284	4.15244	0	px	Intensity	1.18886
Merged	6515.05	4453.9	4061.8	-3919.5	147	427	110.199	91	131	47055	5.7054	4.15244	235.45	177	290	100537	20.4449	4.15244	322.785	193	518	137829	81.1628	4.15244	0	px	Intensity	1.18876
Merged	6515.05	4453.9	4061.8	-3919.5	274	183	108.552	97	129	19865	5.41873	4.15244	222.284	181	276	40678	17.9232	4.15244	473.044	389	587	86567	35.6237	4.15244	0	px	Intensity	1.18837
Merged	6515.05	4453.9	4061.8	-3919.5	67	585	110.284	73	131	64516	6.06189	4.15244	261.935	201	339	153232	26.3654	4.15244	347.88	186	536	203510	82.1128	4.15244	0	px	Intensity	1.18784
Merged	6515.05	4453.9	4061.8	-3919.5	89	501	116.196	98	138	58214	7.173	4.15244	315.034	238	406	157832	31.3781	4.15244	368.946	200	555	184842	81.1029	4.15244	0	px	Intensity	1.18765
Merged	6515.05	4453.9	4061.8	-3919.5	159	356	111.278	95	132	39615	6.0823	4.15244	252.761	181	323	89983	28.0178	4.15244	375.404	252	573	133644	67.8945	4.15244	0	px	Intensity	1.18622
Merged	6515.05	4453.9	4061.8	-3919.5	429	439	107.959	78	128	47394	5.06442	4.15244	201.886	160	240	88628	14.7798	4.15244	302.743	166	517	132904	102.851	4.15244	0	px	Intensity	1.18564
Merged	6515.05	4453.9	4061.8	-3919.5	189	376	107.995	96	128	40606	4.77633	4.15244	206.263	173	251	77555	14.3944	4.15244	491.588	413	569	184837	28.3872	4.15244	0	px	Intensity	1.18524
Merged	6515.05	4453.9	4061.8	-3919.5	252	159	109.742	99	130	17449	5.09343	4.15244	231.736	180	270	36846	14.3377	4.15244	442.44	324	582	70348	57.2411	4.15244	0	px	Intensity	1.1846
Merged	6515.05	4453.9	4061.8	-3919.5	142	430	110.651	98	131	47580	6.00058	4.15244	258.591	198	328	111194	23.1405	4.15244	333.186	212	532	143270	72.7791	4.15244	0	px	Intensity	1.1839
Merged	6515.05	4453.9	4061.8	-3919.5	421	400	109.095	94	129	43638	5.35927	4.15244	252.51	182	322	101004	31.1784	4.15244	328.055	196	574	131222	89.6774	4.15244	0	px	Intensity	1.18246
Merged	6515.05	4453.9	4061.8	-3919.5	234	315	109.946	96	130	34633	5.34152	4.15244	262.295	176	331	82623	33.3525	4.15244	369.813	253	521	116491	65.7651	4.15244	0	px	Intensity	1.1824
Merged	6515.05	4453.9	4061.8	-3919.5	181	176	109.142	94	129	19209	5.75202	4.15244	223.051	176	273	39257	16.0554	4.15244	417.267	286	566	73439	64.0838	4.15244	0	px	Intensity	1.18195
Merged	6515.05	4453.9	4061.8	-3919.5	386	303	108.37	95	128	32836	5.02411	4.15244	204.257	163	252	61890	13.3606	4.15244	351.122	204	541	106390	79.5723	4.15244	0	px	Intensity	1.18114
Merged	6515.05	4453.9	4061.8	-3919.5	456	173	107.642	97	127	18622	5.05551	4.15244	210.775	169	258	36464	16.8697	4.15244	425.861	299	535	73674	66.4177	4.15244	0	px	Intensity	1.17984
Merged	6515.05	4453.9	4061.8	-3919.5	304	87	107.644	98	127	9365	4.82002	4.15244	216.103	177	239	18801	13.9763	4.15244	506.253	439	579	44044	24.4557	4.15244	0	px	Intensity	1.17982
Merged	6515.05	4453.9	4061.8	-3919.5	244	336	111.893	96	132	37596	6.14283	4.15244	262.039	192	353	88045	31.2333	4.15244	355.792	243	537	119546	70.0429	4.15244	0	px	Intensity	1.1797
Merged	6515.05	4453.9	4061.8	-3919.5	205	461	109.508	96	129	50483	5.24156	4.15244	209.471	162	260	96566	14.6417	4.15244	303.02	185	535	139692	96.1278	4.15244	0	px	Intensity	1.178
Merged	6515.05	4453.9	4061.8	-3919.5	287	336	107.917	77	127	36260	4.89197	4.15244	224.667	172	292	75488	20.0473	4.15244	433.018	309	553	145494	52.2207	4.15244	0	px	Intensity	1.17683
Merged	6515.05	4453.9	4061.8	-3919.5	64	651	109.63	92	129	71369	5.67274	4.15244	211.995	145	269	138009	16.2665	4.15244	384.699	260	548	250439	65.4539	4.15244	0	px	Intensity	1.17669
Merged	6515.05	4453.9	4061.8	-3919.5	185	261	108.073	93	127	28207	5.1336	4.15244	217.272	147	262	56708	16.8656	4.15244	468.958	371	585	122398	38.0949	4.15244	0	px	Intensity	1.17513
Merged	6515.05	4453.9	4061.8	-3919.5	225	635	109.797	94	129	69721	5.43008	4.15244	232.465	171	307	147615	17.5409	4.15244	361.112	206	534	229306	67.1589	4.15244	0	px	Intensity	1.1749
Merged	6515.05	4453.9	4061.8	-3919.5	302	1074	108.095	90	127	116094	4.62468	4.15244	217.148	162	259	233217	14.5946	4.15244	500.713	407	599	537766	25.9396	4.15244	0	px	Intensity	1.17489
Merged	6515.05	4453.9	4061.8	-3919.5	376	637	108.226	79	127	68940	4.93607	4.15244	221.443	170	274	141059	18.4576	4.15244	409.531	251	564	260871	67.5166	4.15244	0	px	Intensity	1.17347
Merged	6515.05	4453.9	4061.8	-3919.5	410	257	107.377	97	126	27596	4.20983	4.15244	201.981	164	236	51909	13.6659	4.15244	489.786	412	568	125875	30.053	4.15244	0	px	Intensity	1.17343
Merged	6515.05	4453.9	4061.8	-3919.5	201	401	109.314	97	128	43835	5.46329	4.15244	227.267	179	281	91134	18.3379	4.15244	339.965	236	516	136326	72.4312	4.15244	0	px	Intensity	1.17094
Merged	6515.05	4453.9	4061.8	-3919.5	37	288	107.625	92	126	30996	4.87688	4.15244	201.788	167	247	58115	14.3144	4.15244	503.517	426	583	145013	25.0467	4.15244	0	px	Intensity	1.17073
Merged	6515.05	4453.9	4061.8	-3919.5	58	202	108.084	98	126	21833	4.54606	4.15244	219.53	168	286	44345	18.4473	4.15244	473.366	372	563	95620	37.906	4.15244	0	px	Intensity	1.16576
Merged	6515.05	4453.9	4061.8	-3919.5	337	510	109.824	90	128	56010	5.45152	4.15244	235.751	175	293	120233	18.1314	4.15244	310.445	169	519	158327	88.4126	4.15244	0	px	Intensity	1.16551
Merged	6515.05	4453.9	4061.8	-3919.5	236	120	112.483	97	131	13498	6.1323	4.15244	277.633	221	346	33316	24.3069	4.15244	439.867	335	536	52784	44.9873	4.15244	0	px	Intensity	1.16462
Merged	6515.05	4453.9	4061.8	-3919.5	194	448	112.658	95	131	50471	6.61247	4.15244	272.984	196	375	122297	41.0835	4.15244	406.391	287	545	182063	62.9815	4.15244	0	px	Intensity	1.16281
Merged	6515.05	4453.9	4061.8	-3919.5	276	203	106.759	97	124	21672	4.30634	4.15244	200.941	169	259	40791	14.16	4.15244	444.35	275	568	90203	68.7999	4.15244	0	px	Intensity	1.1615
Merged	6515.05	4453.9	4061.8	-3919.5	448	307	107.163	96	124	32899	4.63822	4.15244	200.964	153	245	61696	14.4369	4.15244	501.427	428	586	153938	24.9391	4.15244	0	px	Intensity	1.15712
Merged	6515.05	4453.9	4061.8	-3919.5	259	111	122.081	103	141	13551	8.31264	4.15244	365.91	306	498	40616	34.7388	4.15244	441.189	335	531	48972	47.945	4.15244	0	px	Intensity	1.15497
Merged	6515.05	4453.9	4061.8	-3919.5	269	744	108.688	92	125	80864	5.15754	4.15244	209.228	162	252	155666	15.2574	4.15244	375.466	235	550	279347	73.9696	4.15244	0	px	Intensity	1.15008
Merged	6515.05	4453.9	4061.8	-3919.5	439	174	107.241	96	123	18660	4.49534	4.15244	200.195	166	264	34834	15.2331	4.15244	504.316	437	581	87751	25.5604	4.15244	0	px	Intensity	1.14695
Merged	6515.05	4453.9	4061.8	-3919.5	446	407	107.423	94	123	43721	4.54263	4.15244	201.614	164	256	82057	14.497	4.15244	504.373	417	597	205280	25.5856	4.15244	0	px	Intensity	1.14501
Merged	6515.05	4453.9	4061.8	-3919.5	453	139	107.482	98	123	14940	4.58811	4.15244	201.266	170	239	27976	14.7933	4.15244	503.705	444	569	70015	24.4437	4.15244	0	px	Intensity	1.14438
Merged	6515.05	4453.9	4061.8	-3919.5	449	1511	106.711	91	122	161241	4.40033	4.15244	201.926	155	264	305110	14.5296	4.15244	507.569	423	598	766937	26.7973	4.15244	0	px	Intensity	1.14327
Merged	6515.05	4453.9	4061.8	-3919.5	422	194	107.649	97	123	20884	4.90479	4.15244	209.624	164	249	40667	16.0074	4.15244	462.113	372	560	89650	37.6918	4.15244	0	px	Intensity	1.1426
Merged	6515.05	4453.9	4061.8	-3919.5	72	683	107.728	96	123	73578	4.55964	4.15244	204.988	167	247	140007	13.8296	4.15244	495.963	407	578	338743	27.7088	4.15244	0	px	Intensity	1.14177
Merged	6515.05	4453.9	4061.8	-3919.5	470	492	108.608	94	124	53435	5.25171	4.15244	241.51	170	313	118823	26.5231	4.15244	387.238	230	552	190521	72.6894	4.15244	0	px	Intensity	1.14172
Merged	6515.05	4453.9	4061.8	-3919.5	145	226	107.774	90	123	24357	4.82309	4.15244	201.261	163	242	45485	14.1423	4.15244	491.416	416	571	111060	26.0627	4.15244	0	px	Intensity	1.14127
Merged	6515.05	4453.9	4061.8	-3919.5	210	406	107.271	96	122	43552	5.07499	4.15244	211.692	170	270	85947	15.3216	4.15244	401.709	278	557	163094	67.9963	4.15244	0	px	Intensity	1.13731
Merged	6515.05	4453.9	4061.8	-3919.5	350	258	107.481	97	122	27730	4.29415	4.15244	215.085	166	262	55492	15.0879	4.15244	466.981	366	578	120481	40.4948	4.15244	0	px	Intensity	1.13509
Merged	6515.05	4453.9	4061.8	-3919.5	45	386	106.648	90	121	41166	4.52152	4.15244	202.883	161	246	78313	14.2248	4.15244	322.516	178	560	124491	101.645	4.15244	0	px	Intensity	1.13458
Merged	6515.05	4453.9	4061.8	-3919.5	481	305	108.167	97	122	32991	4.99177	4.15244	233.134	168	305	71106	26.6974	4.15244	325.298	212	518	99216	73.9714	4.15244	0	px	Intensity	1.12788
Merged	6515.05	4453.9	4061.8	-3919.5	267	183	107.35	98	121	19645	4.32854	4.15244	213.246	179	252	39024	14.7207	4.15244	484.295	423	573	88626	28.78	4.15244	0	px	Intensity	1.12716
Merged	6515.05	4453.9	4061.8	-3919.5	431	607	105.73	94	119	64178	4.32145	4.15244	184.522	139	221	112005	13.1613	4.15244	298.486	171	541	181181	95.0655	4.15244	0	px	Intensity	1.12551
Merged	6515.05	4453.9	4061.8	-3919.5	478	354	105.847	93	119	37470	4.16617	4.15244	195.404	153	235	69173	13.9972	4.15244	506.364	442	600	179253	24.8051	4.15244	0	px	Intensity	1.12426
Merged	6515.05	4453.9	4061.8	-3919.5	355	386	109.021	95	122	42082	4.70507	4.15244	243.277	196	303	93905	21.4307	4.15244	414.404	263	551	159960	62.6224	4.15244	0	px	Intensity	1.11905
Merged	6515.05	4453.9	4061.8	-3919.5	491	195	106.359	95	119	20740	4.5555	4.15244	209.918	151	260	40934	17.8354	4.15244	457.513	338	542	89215	44.5499	4.15244	0	px	Intensity	1.11885
Merged	6515.05	4453.9	4061.8	-3919.5	296	163	108.337	99	121	17659	4.65674	4.15244	217.847	169	298	35509	17.4752	4.15244	468.27	374	555	76328	39.1475	4.15244	0	px	Intensity	1.11688
Merged	6515.05	4453.9	4061.8	-3919.5	408	472	106.689	84	119	50357	4.49061	4.15244	202.928	166	248	95782	14.0773	4.15244	498.114	428	614	235110	28.8405	4.15244	0	px	Intensity	1.1154
Merged	6515.05	4453.9	4061.8	-3919.5	265	252	106.726	95	119	26895	4.43411	4.15244	211.734	178	253	53357	15.6019	4.15244	435.909	323	548	109849	51.1935	4.15244	0	px	Intensity	1.115
Merged	6515.05	4453.9	4061.8	-3919.5	65	433	107.649	84	120	46612	4.50745	4.15244	204.995	169	247	88763	13.9791	4.15244	450.674	286	586	195142	68.0854	4.15244	0	px	Intensity	1.11473
Merged	6515.05	4453.9	4061.8	-3919.5	275	283	106.781	97	119	30219	3.9469	4.15244	201.035	157	243	56893	14.31	4.15244	431.057	269	559	121989	58.4034	4.15244	0	px	Intensity	1.11443
Merged	6515.05	4453.9	4061.8	-3919.5	271	165	107.727	96	120	17775	4.88464	4.15244	210.352	179	253	34708	15.0934	4.15244	426.594	306	531	70388	56.119	4.15244	0	px	Intensity	1.11392
Merged	6515.05	4453.9	4061.8	-3919.5	31	451	106.84	92	119	48185	4.43546	4.15244	202.747	164	252	91439	14.8155	4.15244	331.754	179	543	149621	102.878	4.15244	0	px	Intensity	1.11381
Merged	6515.05	4453.9	4061.8	-3919.5	369	135	109.556	100	122	14790	4.55317	4.15244	222.807	184	283	30079	18.0885	4.15244	443.015	311	556	59807	55.1386	4.15244	0	px	Intensity	1.11359
Merged	6515.05	4453.9	4061.8	-3919.5	406	482	106.039	92	118	51111	4.53652	4.15244	202.716	162	239	97709	14.3018	4.15244	416.662	260	566	200831	69.798	4.15244	0	px	Intensity	1.11279
Merged	6515.05	4453.9	4061.8	-3919.5	479	409	105.289	92	117	43063	4.16657	4.15244	184.046	146	215	75275	13.0282	4.15244	328.88	163	536	134512	99.1941	4.15244	0	px	Intensity	1.11123
Merged	6515.05	4453.9	4061.8	-3919.5	466	385	106.249	91	118	40906	4.3057	4.15244	196.317	148	230	75582	14.1084	4.15244	498.917	407	585	192083	28.1167	4.15244	0	px	Intensity	1.1106
Merged	6515.05	4453.9	4061.8	-3919.5	243	234	105.449	94	117	24675	4.43552	4.15244	201.906	163	253	47246	14.3788	4.15244	410.085	266	556	95960	67.663	4.15244	0	px	Intensity	1.10954
Merged	6515.05	4453.9	4061.8	-3919.5	472	160	106.406	96	118	17025	4.44463	4.15244	196.55	161	238	31448	14.4618	4.15244	507.506	434	574	81201	24.5809	4.15244	0	px	Intensity	1.10896
Merged	6515.05	4453.9	4061.8	-3919.5	165	325	107.32	97	119	34879	4.29434	4.15244	207.418	161	247	67411	15.6477	4.15244	491.04	389	595	159588	30.1603	4.15244	0	px	Intensity	1.10883
Merged	6515.05	4453.9	4061.8	-3919.5	397	433	107.342	96	119	46479	4.5	4.15244	225.43	176	275	97611	17.6047	4.15244	452.764	350	562	196047	44.9238	4.15244	0	px	Intensity	1.10861
Merged	6515.05	4453.9	4061.8	-3919.5	241	276	107.442	96	119	29654	4.60158	4.15244	218.851	171	265	60403	15.8031	4.15244	395.112	239	607	109051	74.9962	4.15244	0	px	Intensity	1.10757
Merged	6515.05	4453.9	4061.8	-3919.5	457	237	106.549	93	118	25252	4.19392	4.15244	200.43	162	246	47502	14.2987	4.15244	503.498	442	576	119329	25.0539	4.15244	0	px	Intensity	1.10748
Merged	6515.05	4453.9	4061.8	-3919.5	461	409	105.719	95	117	43239	4.23715	4.15244	188.687	156	219	77173	11.7505	4.15244	311.174	163	548	127270	98.2923	4.15244	0	px	Intensity	1.10671
Merged	6515.05	4453.9	4061.8	-3919.5	434	336	107.673	89	119	36178	4.66969	4.15244	210.664	171	247	70783	15.1474	4.15244	462.503	325	561	155401	49.2273	4.15244	0	px	Intensity	1.1052
Merged	6515.05	4453.9	4061.8	-3919.5	223	208	107.774	92	119	22417	4.34224	4.15244	209.26	164	262	43526	15.6839	4.15244	491.115	409	566	102152	27.6864	4.15244	0	px	Intensity	1.10416
Merged	6515.05	4453.9	4061.8	-3919.5	371	293	106.157	96	117	31104	4.2507	4.15244	199.427	164	248	58432	14.5148	4.15244	487.212	401	605	142753	33.1161	4.15244	0	px	Intensity	1.10214
Merged	6515.05	4453.9	4061.8	-3919.5	297	265	107.072	96	118	28374	4.40127	4.15244	208.879	167	248	55353	14.2216	4.15244	493.491	392	567	130775	28.358	4.15244	0	px	Intensity	1.10207
Merged	6515.05	4453.9	4061.8	-3919.5	190	175	106.217	97	117	18588	4.42952	4.15244	199.811	148	235	34967	13.8547	4.15244	448.206	269	562	78436	66.1233	4.15244	0	px	Intensity	1.10152
Merged	6515.05	4453.9	4061.8	-3919.5	458	316	106.339	95	117	33603	4.35708	4.15244	200.642	161	248	63403	13.6953	4.15244	502.633	432	585	158832	24.7651	4.15244	0	px	Intensity	1.10026
Merged	6515.05	4453.9	4061.8	-3919.5	468	392	105.722	95	116	41443	4.09541	4.15244	196.112	160	242	76876	13.9603	4.15244	486.342	404	596	190646	30.3829	4.15244	0	px	Intensity	1.09722
Merged	6515.05	4453.9	4061.8	-3919.5	490	95	106.716	98	117	10138	4.05284	4.15244	195.821	165	228	18603	14.2691	4.15244	509.695	454	578	48421	23.0016	4.15244	0	px	Intensity	1.09637
Merged	6515.05	4453.9	4061.8	-3919.5	217	245	107.69	95	118	26384	4.67335	4.15244	219.265	183	261	53720	14.8053	4.15244	407.437	262	549	99822	70.1542	4.15244	0	px	Intensity	1.09574
Merged	6515.05	4453.9	4061.8	-3919.5	227	149	106.805	98	117	15914	4.40209	4.15244	215.463	181	251	32104	13.4099	4.15244	411.114	292	565	61256	66.0008	4.15244	0	px	Intensity	1.09545
Merged	6515.05	4453.9	4061.8	-3919.5	161	143	107.79	97	118	15414	4.3927	4.15244	223.231	174	262	31922	15.8029	4.15244	423.126	270	535	60507	69.744	4.15244	0	px	Intensity	1.09472
Merged	6515.05	4453.9	4061.8	-3919.5	404	278	107.824	93	118	29975	4.28371	4.15244	212.773	158	252	59151	14.8885	4.15244	474.845	370	609	132007	37.6721	4.15244	0	px	Intensity	1.09438
Merged	6515.05	4453.9	4061.8	-3919.5	309	125	107.2	70	117	13400	5.5945	4.15244	213.136	174	247	26642	14.3476	4.15244	503.072	445	566	62884	23.2804	4.15244	0	px	Intensity	1.09142
Merged	6515.05	4453.9	4061.8	-3919.5	66	95	106.326	99	115	10101	3.49924	4.15244	203.737	173	238	19355	13.7613	4.15244	502.516	440	564	47739	26.3614	4.15244	0	px	Intensity	1.08158
Merged	6515.05	4453.9	4061.8	-3919.5	450	2	104.5	104	105	209	1	4.15244	187.5	167	208	375	29	4.15244	515.5	514	517	1031	2.23607	4.15244	0	px	Intensity	1.00478

## Sheet: L170D-2
FileName	Time (ms)	Z Pos	X Pos	Y Pos	ROI ID	ROI Area	ROI Mean Intensity(Red)	ROI Min Intensity(Red)	ROI Max Intensity(Red)	ROI Sum Intensity(Red)	ROI StDev Intensity(Red)	ROI Signal/Background(Red)	ROI Mean Intensity(Blue)	ROI Min Intensity(Blue)	ROI Max Intensity(Blue)	ROI Sum Intensity(Blue)	ROI StDev Intensity(Blue)	ROI Signal/Background(Blue)	ROI Mean Intensity(Mono)	ROI Min Intensity(Mono)	ROI Max Intensity(Mono)	ROI Sum Intensity(Mono)	ROI StDev Intensity(Mono)	ROI Signal/Background(Mono)	Area Fraction	Unit	Channel	Red ratio
Merged	84202.7	4449.73	4085.4	-2520.4	55	578	149.877	99	646	86629	68.8466	3.2907	517.967	212	1303	299385	313.455	3.2907	397.109	255	581	229529	73.3151	3.2907	0	px	Intensity	4.3102
Merged	84202.7	4449.73	4085.4	-2520.4	62	1233	153.125	99	441	188803	42.9633	3.2907	789.558	233	1618	973525	355.775	3.2907	380.891	249	608	469639	65.9447	3.2907	0	px	Intensity	2.88
Merged	84202.7	4449.73	4085.4	-2520.4	134	359	127.097	94	347	45628	36.8474	3.2907	254.136	183	346	91235	23.4024	3.2907	360.604	245	535	129457	73.1345	3.2907	0	px	Intensity	2.73019
Merged	84202.7	4449.73	4085.4	-2520.4	130	607	120.147	94	323	72929	19.8705	3.2907	350.32	219	513	212644	54.3937	3.2907	357.72	208	547	217136	67.6627	3.2907	0	px	Intensity	2.68838
Merged	84202.7	4449.73	4085.4	-2520.4	53	494	134.887	101	354	66634	27.7849	3.2907	528.174	240	814	260918	156.557	3.2907	371.33	240	607	183437	69.406	3.2907	0	px	Intensity	2.62443
Merged	84202.7	4449.73	4085.4	-2520.4	23	1073	119.761	94	314	128504	19.8775	3.2907	277.174	191	381	297408	34.0265	3.2907	352.216	206	851	377928	87.27	3.2907	0	px	Intensity	2.62188
Merged	84202.7	4449.73	4085.4	-2520.4	66	961	122.888	85	311	118095	20.5059	3.2907	351.531	210	500	337821	48.5686	3.2907	338.706	213	636	325496	71.3747	3.2907	0	px	Intensity	2.53077
Merged	84202.7	4449.73	4085.4	-2520.4	69	753	120.483	97	297	90724	20.7811	3.2907	258.625	188	335	194745	25.1365	3.2907	380.608	243	543	286598	67.6187	3.2907	0	px	Intensity	2.46507
Merged	84202.7	4449.73	4085.4	-2520.4	81	383	146.483	106	358	56103	35.5015	3.2907	603.188	300	955	231021	178.868	3.2907	352.491	236	570	135004	73.7329	3.2907	0	px	Intensity	2.44397
Merged	84202.7	4449.73	4085.4	-2520.4	10	410	134.088	91	322	54976	29.9427	3.2907	499.776	245	760	204908	133.36	3.2907	329.983	197	564	135293	80.7689	3.2907	0	px	Intensity	2.40141
Merged	84202.7	4449.73	4085.4	-2520.4	24	406	121.399	99	290	49288	22.4576	3.2907	254.724	190	328	103418	26.9774	3.2907	307.002	172	567	124643	103.329	3.2907	0	px	Intensity	2.38882
Merged	84202.7	4449.73	4085.4	-2520.4	58	566	122.482	85	288	69325	23.4699	3.2907	317.67	201	459	179801	59.8165	3.2907	399.693	264	563	226226	61.9316	3.2907	0	px	Intensity	2.35136
Merged	84202.7	4449.73	4085.4	-2520.4	101	1120	121.81	95	283	136427	19.1406	3.2907	374.562	172	1132	419510	246.328	3.2907	390.363	244	558	437206	65.6997	3.2907	0	px	Intensity	2.32329		Mean
Merged	84202.7	4449.73	4085.4	-2520.4	80	419	150.227	107	341	62945	34.6132	3.2907	594.752	312	829	249201	131.471	3.2907	317.697	207	519	133115	75.0102	3.2907	0	px	Intensity	2.2699		With focus		No focus
Merged	84202.7	4449.73	4085.4	-2520.4	29	1399	117.686	84	258	164643	13.1568	3.2907	293.904	174	434	411171	41.0224	3.2907	366.583	180	1034	512849	128.137	3.2907	0	px	Intensity	2.19227		366.104		265.425
Merged	84202.7	4449.73	4085.4	-2520.4	127	558	119.719	66	258	66803	18.9887	3.2907	307.258	207	422	171450	44.8894	3.2907	380.609	235	552	212380	75.5697	3.2907	0	px	Intensity	2.15505
Merged	84202.7	4449.73	4085.4	-2520.4	135	454	123.024	92	261	55853	19.2937	3.2907	308.544	217	398	140079	39.4959	3.2907	311.817	179	537	141565	84.8669	3.2907	0	px	Intensity	2.12153
Merged	84202.7	4449.73	4085.4	-2520.4	104	639	116.718	96	240	74583	16.2359	3.2907	275.299	183	358	175916	32.8724	3.2907	378.103	228	571	241608	75.3452	3.2907	0	px	Intensity	2.05623
Merged	84202.7	4449.73	4085.4	-2520.4	15	729	124.579	82	250	90818	18.4531	3.2907	373	217	554	271917	71.9993	3.2907	351.026	229	563	255898	71.2979	3.2907	0	px	Intensity	2.00676
Merged	84202.7	4449.73	4085.4	-2520.4	94	1222	124.131	90	240	151688	16.6435	3.2907	383.066	227	617	468107	67.9505	3.2907	370.971	225	970	453327	84.9684	3.2907	0	px	Intensity	1.93344
Merged	84202.7	4449.73	4085.4	-2520.4	131	590	117.725	88	227	69458	17.7265	3.2907	240.732	181	301	142032	18.6778	3.2907	307.803	186	550	181604	88.2143	3.2907	0	px	Intensity	1.92822
Merged	84202.7	4449.73	4085.4	-2520.4	77	356	128.511	98	235	45750	20.5772	3.2907	347.469	261	431	123699	38.3991	3.2907	324.803	207	519	115630	73.521	3.2907	0	px	Intensity	1.82863
Merged	84202.7	4449.73	4085.4	-2520.4	71	536	116.869	94	213	62642	14.1113	3.2907	298.541	216	386	160018	37.1384	3.2907	352.007	235	540	188676	73.5067	3.2907	0	px	Intensity	1.82255
Merged	84202.7	4449.73	4085.4	-2520.4	120	439	114.323	75	208	50188	14.0888	3.2907	237.141	195	303	104105	18.7834	3.2907	366.235	231	600	160777	75.7296	3.2907	0	px	Intensity	1.8194
Merged	84202.7	4449.73	4085.4	-2520.4	146	417	123.847	93	223	51644	16.8706	3.2907	387.312	214	573	161509	81.7884	3.2907	310.832	185	519	129617	83.3336	3.2907	0	px	Intensity	1.80062
Merged	84202.7	4449.73	4085.4	-2520.4	99	480	129.488	101	229	62154	15.6601	3.2907	612.408	262	949	293956	189.965	3.2907	357.958	248	563	171820	69.3553	3.2907	0	px	Intensity	1.76851
Merged	84202.7	4449.73	4085.4	-2520.4	89	532	115.442	98	203	61415	14.1148	3.2907	241.581	187	306	128521	22.7415	3.2907	407.385	262	571	216729	63.107	3.2907	0	px	Intensity	1.75846
Merged	84202.7	4449.73	4085.4	-2520.4	19	812	113.261	87	198	91968	10.4516	3.2907	241.09	190	302	195765	18.3052	3.2907	321.734	193	522	261248	76.567	3.2907	0	px	Intensity	1.74817
Merged	84202.7	4449.73	4085.4	-2520.4	113	633	120.558	90	210	76313	16.7669	3.2907	277.575	189	386	175705	37.3667	3.2907	380.967	234	562	241152	72.217	3.2907	0	px	Intensity	1.74191	Harwood Lab WspR foci ratio cutoff = 1.7
Merged	84202.7	4449.73	4085.4	-2520.4	14	675	115.184	98	200	77749	10.8072	3.2907	283.874	192	389	191615	36.2744	3.2907	355.228	221	551	239779	76.5772	3.2907	0	px	Intensity	1.73636
Merged	84202.7	4449.73	4085.4	-2520.4	37	525	118.493	92	203	62209	15.8206	3.2907	268.263	197	352	140838	26.2522	3.2907	307.581	172	536	161480	100.877	3.2907	0	px	Intensity	1.71318
Merged	84202.7	4449.73	4085.4	-2520.4	39	321	124.685	100	210	40024	18.2644	3.2907	356.352	214	538	114389	70.5894	3.2907	374.224	260	532	120126	71.5078	3.2907	0	px	Intensity	1.68424
Merged	84202.7	4449.73	4085.4	-2520.4	129	740	114.797	98	190	84950	10.5765	3.2907	266.681	201	327	197344	24.5309	3.2907	350.819	218	560	259606	73.497	3.2907	0	px	Intensity	1.65509
Merged	84202.7	4449.73	4085.4	-2520.4	87	330	119.121	93	196	39310	13.712	3.2907	323.697	216	464	106820	62.5287	3.2907	384.879	258	538	127010	66.3609	3.2907	0	px	Intensity	1.64538
Merged	84202.7	4449.73	4085.4	-2520.4	38	370	115.951	98	183	42902	13.012	3.2907	232.592	186	274	86059	16.0168	3.2907	354.446	208	561	131145	82.6946	3.2907	0	px	Intensity	1.57825
Merged	84202.7	4449.73	4085.4	-2520.4	133	535	119.398	98	188	63878	11.2704	3.2907	320.548	218	433	171493	49.8425	3.2907	319.74	211	535	171061	74.8913	3.2907	0	px	Intensity	1.57456
Merged	84202.7	4449.73	4085.4	-2520.4	98	726	116.15	96	181	84325	8.66606	3.2907	305.687	198	409	221929	39.7352	3.2907	310.906	197	550	225718	83.8719	3.2907	0	px	Intensity	1.55833
Merged	84202.7	4449.73	4085.4	-2520.4	57	720	113.419	97	176	81662	9.10112	3.2907	241.092	190	289	173586	18.4604	3.2907	339.274	224	523	244277	72.9725	3.2907	0	px	Intensity	1.55176
Merged	84202.7	4449.73	4085.4	-2520.4	45	782	129.916	101	198	101594	15.2093	3.2907	442.598	269	592	346112	59.1363	3.2907	312.165	161	549	244113	87.7232	3.2907	0	px	Intensity	1.52407
Merged	84202.7	4449.73	4085.4	-2520.4	144	441	115.249	88	174	50825	9.90799	3.2907	291.612	177	383	128601	42.2413	3.2907	370.127	225	537	163226	73.7611	3.2907	0	px	Intensity	1.50977
Merged	84202.7	4449.73	4085.4	-2520.4	35	483	116.157	96	173	56104	10.2239	3.2907	267.886	200	341	129389	24.1393	3.2907	311.143	162	565	150282	83.6613	3.2907	0	px	Intensity	1.48936
Merged	84202.7	4449.73	4085.4	-2520.4	21	1378	108.925	87	162	150098	5.39298	3.2907	214.82	169	260	296022	14.6906	3.2907	502.523	416	591	692477	26.9052	3.2907	0	px	Intensity	1.48727
Merged	84202.7	4449.73	4085.4	-2520.4	7	249	122.839	100	182	30587	14.4272	3.2907	416.502	243	592	103709	81.2174	3.2907	332.269	193	528	82735	79.2561	3.2907	0	px	Intensity	1.48161
Merged	84202.7	4449.73	4085.4	-2520.4	72	1291	111.026	86	163	143334	7.54824	3.2907	222.537	164	286	287295	16.7597	3.2907	354.631	171	613	457829	84.3694	3.2907	0	px	Intensity	1.46813
Merged	84202.7	4449.73	4085.4	-2520.4	151	311	116.73	89	170	36303	10.448	3.2907	300.669	211	389	93508	43.0461	3.2907	321.392	210	510	99953	78.8595	3.2907	0	px	Intensity	1.45635
Merged	84202.7	4449.73	4085.4	-2520.4	118	476	121.342	95	175	57759	11.3799	3.2907	392.832	240	576	186988	75.7865	3.2907	339.95	239	528	161816	72.3215	3.2907	0	px	Intensity	1.4422
Merged	84202.7	4449.73	4085.4	-2520.4	73	905	115.053	87	163	104123	8.16986	3.2907	294.158	221	419	266213	33.8051	3.2907	327.36	190	526	296261	74.3573	3.2907	0	px	Intensity	1.41674
Merged	84202.7	4449.73	4085.4	-2520.4	70	569	116.483	97	165	66279	9.8477	3.2907	298.265	195	405	169713	39.4944	3.2907	377.678	226	561	214899	74.1689	3.2907	0	px	Intensity	1.41651
Merged	84202.7	4449.73	4085.4	-2520.4	56	337	111.617	95	158	37615	6.65699	3.2907	259.567	187	333	87474	27.5675	3.2907	315.086	171	542	106184	102.287	3.2907	0	px	Intensity	1.41555
Merged	84202.7	4449.73	4085.4	-2520.4	157	326	113.77	97	160	37089	7.32015	3.2907	289.328	199	416	94321	39.7896	3.2907	318.494	192	538	103829	83.642	3.2907	0	px	Intensity	1.40635
Merged	84202.7	4449.73	4085.4	-2520.4	121	388	117.487	95	164	45585	9.57441	3.2907	299.871	189	397	116350	39.2118	3.2907	308.562	165	531	119722	102.754	3.2907	0	px	Intensity	1.3959
Merged	84202.7	4449.73	4085.4	-2520.4	115	478	112.751	94	157	53895	6.96442	3.2907	290.416	209	375	138819	35.4407	3.2907	302.339	173	522	144518	98.4931	3.2907	0	px	Intensity	1.39245
Merged	84202.7	4449.73	4085.4	-2520.4	162	461	113.117	95	157	52147	7.52286	3.2907	279.21	197	361	128716	35.302	3.2907	300.883	173	519	138707	89.6144	3.2907	0	px	Intensity	1.38794
Merged	84202.7	4449.73	4085.4	-2520.4	1	131016	108.595	55	149	14227739	5.01977	3.2907	213.765	94	300	28006646	14.7704	3.2907	561.52	104	720	73568086	33.251	3.2907	0	px	Intensity	1.37207
Merged	84202.7	4449.73	4085.4	-2520.4	141	398	118.947	87	163	47341	10.847	3.2907	304.593	210	404	121228	43.6606	3.2907	298.445	175	519	118781	97.0861	3.2907	0	px	Intensity	1.37036
Merged	84202.7	4449.73	4085.4	-2520.4	64	907	110.642	81	151	100352	6.15294	3.2907	222.153	163	281	201493	16.2683	3.2907	307.642	158	534	279031	91.2823	3.2907	0	px	Intensity	1.36477
Merged	84202.7	4449.73	4085.4	-2520.4	54	500	111.652	94	151	55826	6.62025	3.2907	239.632	190	298	119816	19.4558	3.2907	383.734	253	575	191867	69.672	3.2907	0	px	Intensity	1.35242
Merged	84202.7	4449.73	4085.4	-2520.4	108	905	108.135	77	145	97862	5.02505	3.2907	211.807	169	258	191685	14.3513	3.2907	370.645	217	568	335434	66.8567	3.2907	0	px	Intensity	1.34092
Merged	84202.7	4449.73	4085.4	-2520.4	154	616	111.133	94	149	68458	6.69413	3.2907	270.273	180	357	166488	35.7125	3.2907	415.497	252	567	255946	66.5595	3.2907	0	px	Intensity	1.34073
Merged	84202.7	4449.73	4085.4	-2520.4	145	430	113.77	89	152	48921	9.00906	3.2907	253.53	194	327	109018	24.2151	3.2907	394.942	272	580	169825	61.5655	3.2907	0	px	Intensity	1.33603
Merged	84202.7	4449.73	4085.4	-2520.4	142	593	113.046	97	151	67036	7.0088	3.2907	257.872	186	321	152918	24.5087	3.2907	300.636	180	546	178277	85.8066	3.2907	0	px	Intensity	1.33574
Merged	84202.7	4449.73	4085.4	-2520.4	43	1244	126.963	95	169	157942	10.797	3.2907	495.018	251	796	615803	118.321	3.2907	366.38	204	1075	455777	135.083	3.2907	0	px	Intensity	1.3311
Merged	84202.7	4449.73	4085.4	-2520.4	171	677	112.767	88	150	76343	6.96802	3.2907	224.477	154	279	151971	18.6386	3.2907	378.514	219	550	256254	76.8409	3.2907	0	px	Intensity	1.33018
Merged	84202.7	4449.73	4085.4	-2520.4	86	528	109.864	93	146	58008	6.92807	3.2907	212.973	172	257	112450	15.0538	3.2907	320.35	154	540	169145	105.126	3.2907	0	px	Intensity	1.32892
Merged	84202.7	4449.73	4085.4	-2520.4	12	569	110.775	92	147	63031	6.1148	3.2907	257.364	189	325	146440	27.8255	3.2907	366.121	239	548	208323	69.2461	3.2907	0	px	Intensity	1.32701
Merged	84202.7	4449.73	4085.4	-2520.4	74	673	116.068	97	154	78114	7.75921	3.2907	351.783	227	469	236750	47.4828	3.2907	303.923	165	547	204540	94.8928	3.2907	0	px	Intensity	1.3268
Merged	84202.7	4449.73	4085.4	-2520.4	76	790	113.122	86	150	89366	6.53546	3.2907	253.818	195	312	200516	21.1824	3.2907	350.996	225	530	277287	68.2132	3.2907	0	px	Intensity	1.32601
Merged	84202.7	4449.73	4085.4	-2520.4	169	991	107.951	95	143	106979	4.99717	3.2907	210.906	155	255	209008	14.2432	3.2907	505.622	423	601	501071	26.3082	3.2907	0	px	Intensity	1.32468
Merged	84202.7	4449.73	4085.4	-2520.4	105	1255	115.55	38	152	145015	7.84321	3.2907	327.487	212	441	410996	37.1859	3.2907	343.089	170	950	430577	115.867	3.2907	0	px	Intensity	1.31545
Merged	84202.7	4449.73	4085.4	-2520.4	95	546	113.419	93	149	61927	6.85204	3.2907	300.679	218	394	164171	35.6175	3.2907	322.244	186	519	175945	79.0508	3.2907	0	px	Intensity	1.31371
Merged	84202.7	4449.73	4085.4	-2520.4	34	601	112.825	96	148	67808	7.31357	3.2907	247.782	187	313	148917	21.0768	3.2907	365.383	239	552	219595	69.9363	3.2907	0	px	Intensity	1.31176
Merged	84202.7	4449.73	4085.4	-2520.4	175	545	118.657	91	155	64668	10.9212	3.2907	327.716	194	478	178605	68.125	3.2907	396.382	237	552	216028	74.4305	3.2907	0	px	Intensity	1.30629
Merged	84202.7	4449.73	4085.4	-2520.4	102	794	112.985	90	147	89710	6.36936	3.2907	269.849	184	348	214260	25.8354	3.2907	362.237	226	543	287616	64.8734	3.2907	0	px	Intensity	1.30106
Merged	84202.7	4449.73	4085.4	-2520.4	67	676	111.577	92	145	75426	6.3463	3.2907	228.031	187	282	154149	15.68	3.2907	329.04	207	546	222431	81.1693	3.2907	0	px	Intensity	1.29955
Merged	84202.7	4449.73	4085.4	-2520.4	139	775	110.052	84	143	85290	5.93167	3.2907	219.417	175	284	170048	15.5905	3.2907	367.116	225	570	284515	75.5306	3.2907	0	px	Intensity	1.29939
Merged	84202.7	4449.73	4085.4	-2520.4	103	364	122.385	100	158	44548	10.0238	3.2907	441.192	246	632	160594	99.303	3.2907	308.165	191	530	112172	85.8501	3.2907	0	px	Intensity	1.29101
Merged	84202.7	4449.73	4085.4	-2520.4	93	474	112.354	90	145	53256	6.83821	3.2907	254.578	193	318	120670	22.6819	3.2907	314.633	173	530	149136	88.9721	3.2907	0	px	Intensity	1.29056
Merged	84202.7	4449.73	4085.4	-2520.4	40	522	110.728	75	142	57800	6.80183	3.2907	296.291	181	421	154664	54.8231	3.2907	392.082	260	556	204667	67.5789	3.2907	0	px	Intensity	1.28242
Merged	84202.7	4449.73	4085.4	-2520.4	136	605	109.977	98	141	66536	5.47738	3.2907	234	172	282	141570	17.5667	3.2907	362.974	220	534	219599	75.1795	3.2907	0	px	Intensity	1.28209
Merged	84202.7	4449.73	4085.4	-2520.4	44	656	110.832	90	142	72706	5.66589	3.2907	234.02	171	290	153517	16.0222	3.2907	381.509	217	1020	250270	108.516	3.2907	0	px	Intensity	1.28121
Merged	84202.7	4449.73	4085.4	-2520.4	78	364	117.992	87	151	42949	10.4515	3.2907	349.118	214	535	127079	82.3534	3.2907	381.802	261	538	138976	64.829	3.2907	0	px	Intensity	1.27975
Merged	84202.7	4449.73	4085.4	-2520.4	148	581	117.294	98	150	68148	8.87519	3.2907	408.003	217	621	237050	99.6158	3.2907	410.031	240	542	238228	67.934	3.2907	0	px	Intensity	1.27883
Merged	84202.7	4449.73	4085.4	-2520.4	65	359	112.663	86	144	40446	7.08665	3.2907	248.886	187	303	89350	21.7731	3.2907	377.017	273	564	135349	65.5725	3.2907	0	px	Intensity	1.27815
Merged	84202.7	4449.73	4085.4	-2520.4	51	375	107.224	91	137	40209	4.98018	3.2907	204.192	142	243	76572	14.4696	3.2907	498.491	434	591	186934	24.9437	3.2907	0	px	Intensity	1.2777
Merged	84202.7	4449.73	4085.4	-2520.4	167	1686	108.143	91	138	182329	4.68833	3.2907	211.247	162	261	356162	14.5932	3.2907	509.208	401	607	858525	28.7368	3.2907	0	px	Intensity	1.27609
Merged	84202.7	4449.73	4085.4	-2520.4	107	504	119.202	97	152	60078	8.95582	3.2907	411.484	232	582	207388	92.7479	3.2907	346.151	236	612	174460	73.7905	3.2907	0	px	Intensity	1.27514
Merged	84202.7	4449.73	4085.4	-2520.4	79	332	117.166	89	149	38899	8.54754	3.2907	360.081	204	529	119547	78.0177	3.2907	389.187	255	553	129210	68.8627	3.2907	0	px	Intensity	1.2717
Merged	84202.7	4449.73	4085.4	-2520.4	50	389	115.699	96	147	45007	7.78397	3.2907	295.211	205	387	114837	36.0098	3.2907	305.339	168	532	118777	97.9975	3.2907	0	px	Intensity	1.27054
Merged	84202.7	4449.73	4085.4	-2520.4	16	350	108.669	97	138	38034	5.34806	3.2907	209.363	171	253	73277	13.9465	3.2907	493.569	393	573	172749	29.8984	3.2907	0	px	Intensity	1.26992
Merged	84202.7	4449.73	4085.4	-2520.4	75	711	111.183	91	141	79051	6.31854	3.2907	253.962	185	323	180567	22.6743	3.2907	402.608	258	571	286254	67.3769	3.2907	0	px	Intensity	1.26818
Merged	84202.7	4449.73	4085.4	-2520.4	59	737	109.891	94	139	80990	5.8607	3.2907	218.122	171	268	160756	15.687	3.2907	427.201	274	621	314847	62.5575	3.2907	0	px	Intensity	1.26488
Merged	84202.7	4449.73	4085.4	-2520.4	46	403	117.901	73	149	47514	9.05635	3.2907	378.065	231	535	152360	70.8037	3.2907	321.618	193	548	129612	90.5982	3.2907	0	px	Intensity	1.26377
Merged	84202.7	4449.73	4085.4	-2520.4	92	341	124.352	101	157	42404	12.0461	3.2907	606.097	267	978	206679	201.687	3.2907	400.76	243	556	136659	68.0204	3.2907	0	px	Intensity	1.26255
Merged	84202.7	4449.73	4085.4	-2520.4	27	790	108.782	94	137	85938	5.41953	3.2907	217.558	161	266	171871	14.5863	3.2907	502.509	426	600	396982	27.3807	3.2907	0	px	Intensity	1.2594
Merged	84202.7	4449.73	4085.4	-2520.4	160	680	114.613	96	144	77937	8.17977	3.2907	340.741	188	514	231704	73.3379	3.2907	403.688	256	583	274508	64.8271	3.2907	0	px	Intensity	1.2564
Merged	84202.7	4449.73	4085.4	-2520.4	140	520	113.873	99	143	59214	6.68922	3.2907	269.127	191	343	139946	26.4427	3.2907	299.565	171	519	155774	94.8918	3.2907	0	px	Intensity	1.25578
Merged	84202.7	4449.73	4085.4	-2520.4	153	647	111.658	97	140	72243	6.03524	3.2907	262.998	185	335	170160	28.3049	3.2907	288.801	177	527	186854	88.22	3.2907	0	px	Intensity	1.25382
Merged	84202.7	4449.73	4085.4	-2520.4	26	572	118.084	97	148	67544	7.99354	3.2907	333.659	218	435	190853	47.0463	3.2907	328.64	213	519	187982	71.7849	3.2907	0	px	Intensity	1.25335
Merged	84202.7	4449.73	4085.4	-2520.4	48	788	107.766	95	135	84920	4.96263	3.2907	206.627	158	250	162822	14.3867	3.2907	504.07	429	589	397207	26.1859	3.2907	0	px	Intensity	1.25271
Merged	84202.7	4449.73	4085.4	-2520.4	110	258	110.163	96	138	28422	6.39492	3.2907	212.589	172	254	54848	14.3748	3.2907	358.876	195	531	92590	85.1468	3.2907	0	px	Intensity	1.25269
Merged	84202.7	4449.73	4085.4	-2520.4	126	445	108.672	91	136	48359	4.92123	3.2907	219.836	176	266	97827	14.6698	3.2907	501.937	415	582	223362	26.1753	3.2907	0	px	Intensity	1.25147
Merged	84202.7	4449.73	4085.4	-2520.4	123	452	111.093	98	139	50214	5.88112	3.2907	235.173	190	298	106298	18.9444	3.2907	365.164	229	561	165054	72.2428	3.2907	0	px	Intensity	1.2512
Merged	84202.7	4449.73	4085.4	-2520.4	163	341	111.463	96	139	38009	6.0347	3.2907	275.988	196	383	94112	32.5896	3.2907	331.93	212	542	113188	82.5668	3.2907	0	px	Intensity	1.24705
Merged	84202.7	4449.73	4085.4	-2520.4	84	444	117.101	94	146	51993	8.5746	3.2907	363.39	221	545	161345	71.5288	3.2907	342.901	233	542	152248	74.8521	3.2907	0	px	Intensity	1.24678
Merged	84202.7	4449.73	4085.4	-2520.4	109	655	112.597	87	140	73751	6.696	3.2907	262.708	186	341	172074	25.5863	3.2907	380.194	234	569	249027	75.1457	3.2907	0	px	Intensity	1.24337
Merged	84202.7	4449.73	4085.4	-2520.4	47	482	111.961	91	139	53965	6.71006	3.2907	241.49	184	298	116398	17.5052	3.2907	307.525	178	526	148227	92.574	3.2907	0	px	Intensity	1.24151
Merged	84202.7	4449.73	4085.4	-2520.4	63	431	111.968	85	139	48258	7.17943	3.2907	224.752	181	281	96868	16.8929	3.2907	307.731	160	558	132632	104.208	3.2907	0	px	Intensity	1.24143
Merged	84202.7	4449.73	4085.4	-2520.4	125	198	109.556	97	136	21692	5.92594	3.2907	218.237	179	255	43211	15.1575	3.2907	504.919	442	584	99974	23.7565	3.2907	0	px	Intensity	1.24138
Merged	84202.7	4449.73	4085.4	-2520.4	52	446	113.843	99	141	50774	7.11289	3.2907	320.621	223	425	142997	45.6684	3.2907	342.953	236	534	152957	68.1666	3.2907	0	px	Intensity	1.23855
Merged	84202.7	4449.73	4085.4	-2520.4	116	582	109.847	81	136	63931	6.02719	3.2907	244.211	193	317	142131	23.084	3.2907	394.18	235	594	229413	69.7993	3.2907	0	px	Intensity	1.23808
Merged	84202.7	4449.73	4085.4	-2520.4	128	414	108.331	87	134	44849	5.4199	3.2907	215.027	171	256	89021	14.1247	3.2907	500.121	405	610	207050	26.5076	3.2907	0	px	Intensity	1.23695
Merged	84202.7	4449.73	4085.4	-2520.4	11	395	110.858	88	137	43789	6.04782	3.2907	243.248	193	304	96083	22.2684	3.2907	312.408	162	541	123401	93.7354	3.2907	0	px	Intensity	1.23581
Merged	84202.7	4449.73	4085.4	-2520.4	33	1212	112.692	92	139	136583	6.57919	3.2907	257.989	193	358	312683	31.4591	3.2907	409.503	195	1029	496318	127.844	3.2907	0	px	Intensity	1.23345
Merged	84202.7	4449.73	4085.4	-2520.4	42	499	111.349	96	137	55563	5.96812	3.2907	227.493	179	279	113519	15.8516	3.2907	325.591	202	535	162470	77.0495	3.2907	0	px	Intensity	1.23037
Merged	84202.7	4449.73	4085.4	-2520.4	83	467	111.657	91	137	52144	6.03673	3.2907	241.512	192	306	112786	17.7614	3.2907	347.107	229	539	162099	72.6837	3.2907	0	px	Intensity	1.22697
Merged	84202.7	4449.73	4085.4	-2520.4	91	557	110.98	93	136	61816	5.96573	3.2907	227.768	180	282	126867	16.0536	3.2907	312.851	196	526	174258	83.3412	3.2907	0	px	Intensity	1.22544
Merged	84202.7	4449.73	4085.4	-2520.4	166	2281	107.899	92	132	246118	4.66595	3.2907	210.911	159	264	481089	14.5714	3.2907	511.764	417	600	1167334	27.7152	3.2907	0	px	Intensity	1.22336
Merged	84202.7	4449.73	4085.4	-2520.4	49	449	113.648	90	139	51028	6.83658	3.2907	250.546	190	299	112495	20.5656	3.2907	323.114	219	578	145078	77.635	3.2907	0	px	Intensity	1.22307
Merged	84202.7	4449.73	4085.4	-2520.4	111	281	108.907	96	133	30603	4.97135	3.2907	210.42	162	248	59128	15.2272	3.2907	434.128	278	591	121990	53.8456	3.2907	0	px	Intensity	1.22122
Merged	84202.7	4449.73	4085.4	-2520.4	147	325	107.345	98	131	34887	5.06988	3.2907	204.286	165	267	66393	14.825	3.2907	501.185	415	583	162885	26.6048	3.2907	0	px	Intensity	1.22037
Merged	84202.7	4449.73	4085.4	-2520.4	13	472	108.303	86	132	51119	5.26375	3.2907	208.169	160	250	98256	14.808	3.2907	322.64	167	536	152286	102.248	3.2907	0	px	Intensity	1.2188
Merged	84202.7	4449.73	4085.4	-2520.4	88	547	111.793	86	136	61151	6.53772	3.2907	246.559	185	299	134868	19.6611	3.2907	328.49	215	526	179684	73.2576	3.2907	0	px	Intensity	1.21653
Merged	84202.7	4449.73	4085.4	-2520.4	22	646	115.924	93	141	74887	7.58722	3.2907	313.286	188	430	202383	44.3812	3.2907	325.991	203	530	210590	76.0795	3.2907	0	px	Intensity	1.21631
Merged	84202.7	4449.73	4085.4	-2520.4	96	383	112.674	92	137	43154	6.87681	3.2907	283.783	207	361	108689	30.6727	3.2907	304.742	158	519	116716	103.36	3.2907	0	px	Intensity	1.2159
Merged	84202.7	4449.73	4085.4	-2520.4	8	715	116.01	93	141	82947	8.43446	3.2907	346.024	207	600	247407	79.5667	3.2907	321.49	187	586	229865	76.2578	3.2907	0	px	Intensity	1.21541
Merged	84202.7	4449.73	4085.4	-2520.4	20	565	111.198	90	135	62827	6.3366	3.2907	228.161	188	283	128911	16.0765	3.2907	348.267	221	542	196771	80.1789	3.2907	0	px	Intensity	1.21405
Merged	84202.7	4449.73	4085.4	-2520.4	158	2251	107.991	86	131	243088	4.67974	3.2907	212.239	165	267	477751	14.7377	3.2907	506.133	391	635	1139305	27.3091	3.2907	0	px	Intensity	1.21306
Merged	84202.7	4449.73	4085.4	-2520.4	119	406	115.909	79	140	47059	7.7153	3.2907	339.143	224	488	137692	58.9666	3.2907	341.192	221	574	138524	77.8632	3.2907	0	px	Intensity	1.20785
Merged	84202.7	4449.73	4085.4	-2520.4	152	498	113.536	76	137	56541	7.01005	3.2907	322.892	195	443	160800	54.3781	3.2907	373.106	222	558	185807	79.7172	3.2907	0	px	Intensity	1.20666
Merged	84202.7	4449.73	4085.4	-2520.4	143	605	107.787	95	130	65211	4.67981	3.2907	215.033	165	255	130095	15.2363	3.2907	425.041	278	575	257150	62.2884	3.2907	0	px	Intensity	1.20608
Merged	84202.7	4449.73	4085.4	-2520.4	85	378	111.291	94	134	42068	6.38944	3.2907	286.177	194	389	108175	41.4358	3.2907	404.429	282	538	152874	56.3357	3.2907	0	px	Intensity	1.20405
Merged	84202.7	4449.73	4085.4	-2520.4	155	473	108.044	97	130	51105	4.7217	3.2907	215.087	175	278	101736	15.4612	3.2907	459.186	340	561	217195	43.6441	3.2907	0	px	Intensity	1.20321
Merged	84202.7	4449.73	4085.4	-2520.4	124	221	108.941	89	131	24076	5.21057	3.2907	221.398	184	261	48929	14.4433	3.2907	509.262	440	603	112547	26.0805	3.2907	0	px	Intensity	1.20248
Merged	84202.7	4449.73	4085.4	-2520.4	90	545	113.284	97	136	61740	6.89682	3.2907	307.448	218	396	167559	38.0411	3.2907	338.339	227	526	184395	65.7607	3.2907	0	px	Intensity	1.20052
Merged	84202.7	4449.73	4085.4	-2520.4	132	412	111.66	99	134	46004	6.08636	3.2907	283.985	200	362	117002	34.5452	3.2907	349.235	249	537	143885	70.871	3.2907	0	px	Intensity	1.20007
Merged	84202.7	4449.73	4085.4	-2520.4	161	549	108.353	95	130	59486	4.84014	3.2907	212.789	154	269	116821	15.6732	3.2907	508.164	433	583	278982	25.9139	3.2907	0	px	Intensity	1.19978
Merged	84202.7	4449.73	4085.4	-2520.4	82	732	114.474	82	137	83795	7.32292	3.2907	307.243	206	427	224902	41.3534	3.2907	311.116	158	563	227737	91.1453	3.2907	0	px	Intensity	1.19678
Merged	84202.7	4449.73	4085.4	-2520.4	25	515	110.4	95	132	56856	5.80922	3.2907	229.423	168	287	118153	18.3916	3.2907	307.765	173	526	158499	97.9796	3.2907	0	px	Intensity	1.19565
Merged	84202.7	4449.73	4085.4	-2520.4	100	354	107.381	96	128	38013	4.67166	3.2907	207.588	173	246	73486	14.4193	3.2907	504.935	424	624	178747	27.7057	3.2907	0	px	Intensity	1.19201
Merged	84202.7	4449.73	4085.4	-2520.4	41	585	108.27	95	129	63338	4.86003	3.2907	214.468	166	258	125464	14.7436	3.2907	496.807	394	602	290632	28.7581	3.2907	0	px	Intensity	1.19146
Merged	84202.7	4449.73	4085.4	-2520.4	31	780	108.426	96	129	84572	4.8112	3.2907	215.963	170	267	168451	14.7953	3.2907	506.105	420	590	394762	26.4712	3.2907	0	px	Intensity	1.18976
Merged	84202.7	4449.73	4085.4	-2520.4	61	390	112.746	95	134	43971	6.27375	3.2907	296.562	208	396	115659	43.5885	3.2907	313.736	162	562	122357	88.1965	3.2907	0	px	Intensity	1.18851
Merged	84202.7	4449.73	4085.4	-2520.4	97	585	111.103	95	132	64995	5.65095	3.2907	242.446	187	302	141831	17.7969	3.2907	303.068	167	519	177295	86.4962	3.2907	0	px	Intensity	1.18809
Merged	84202.7	4449.73	4085.4	-2520.4	138	464	111.636	97	132	51799	5.99316	3.2907	248.222	181	309	115175	20.2842	3.2907	321.853	215	518	149340	72.505	3.2907	0	px	Intensity	1.18242
Merged	84202.7	4449.73	4085.4	-2520.4	30	642	111.048	94	131	71293	5.81823	3.2907	227.565	180	278	146097	17.39	3.2907	382.71	256	549	245700	71.4965	3.2907	0	px	Intensity	1.17967
Merged	84202.7	4449.73	4085.4	-2520.4	60	511	111.599	88	131	57027	6.47771	3.2907	243.507	197	303	124432	19.1213	3.2907	413.468	263	576	211282	65.686	3.2907	0	px	Intensity	1.17385
Merged	84202.7	4449.73	4085.4	-2520.4	156	396	109.904	97	129	43522	5.4645	3.2907	224.74	177	270	88997	16.9617	3.2907	306.707	172	540	121456	95.5073	3.2907	0	px	Intensity	1.17375
Merged	84202.7	4449.73	4085.4	-2520.4	137	640	111.866	85	131	71594	6.53963	3.2907	288.359	215	373	184550	35.1678	3.2907	372.691	241	543	238522	68.91	3.2907	0	px	Intensity	1.17105
Merged	84202.7	4449.73	4085.4	-2520.4	106	310	108.455	96	127	33621	4.97242	3.2907	224.881	182	279	69713	15.8376	3.2907	437.184	323	542	135527	41.8715	3.2907	0	px	Intensity	1.17099
Merged	84202.7	4449.73	4085.4	-2520.4	172	264	106.761	94	125	28185	4.68839	3.2907	201.038	165	245	53074	14.6856	3.2907	489.587	393	567	129251	30.5348	3.2907	0	px	Intensity	1.17084
Merged	84202.7	4449.73	4085.4	-2520.4	149	497	108.843	91	127	54095	5.1221	3.2907	241.94	190	315	120244	20.953	3.2907	311.463	146	567	154797	103.757	3.2907	0	px	Intensity	1.16682
Merged	84202.7	4449.73	4085.4	-2520.4	68	343	112.455	95	131	38572	5.82895	3.2907	249.589	189	317	85609	22.3473	3.2907	377.81	263	567	129589	67.2194	3.2907	0	px	Intensity	1.16491
Merged	84202.7	4449.73	4085.4	-2520.4	168	365	108.189	94	126	39489	4.72456	3.2907	211.814	171	260	77312	15.7417	3.2907	499.578	425	605	182346	26.3204	3.2907	0	px	Intensity	1.16463
Merged	84202.7	4449.73	4085.4	-2520.4	112	485	110.775	80	129	53726	5.71481	3.2907	239.425	185	292	116121	19.8497	3.2907	313.225	186	559	151914	90.1522	3.2907	0	px	Intensity	1.16452
Merged	84202.7	4449.73	4085.4	-2520.4	122	212	109.665	95	127	23249	4.99289	3.2907	237.047	191	285	50254	18.6923	3.2907	427.241	230	537	90575	68.0711	3.2907	0	px	Intensity	1.15807
Merged	84202.7	4449.73	4085.4	-2520.4	165	974	107.546	84	124	104750	4.6181	3.2907	212.398	173	268	206876	14.4959	3.2907	507.494	439	608	494299	26.9512	3.2907	0	px	Intensity	1.15299
Merged	84202.7	4449.73	4085.4	-2520.4	159	267	107.846	97	124	28795	4.56655	3.2907	213.453	175	259	56992	15.0786	3.2907	499.925	404	585	133480	25.692	3.2907	0	px	Intensity	1.14978
Merged	84202.7	4449.73	4085.4	-2520.4	18	170	107.165	97	123	18218	4.55343	3.2907	198.188	167	241	33692	13.6345	3.2907	458.4	331	554	77928	49.444	3.2907	0	px	Intensity	1.14777
Merged	84202.7	4449.73	4085.4	-2520.4	150	531	108.269	98	123	57491	4.49297	3.2907	213.8	179	254	113528	14.4597	3.2907	486.657	377	577	258415	32.4178	3.2907	0	px	Intensity	1.13606
Merged	84202.7	4449.73	4085.4	-2520.4	28	329	108.304	90	123	35632	4.74245	3.2907	214.267	173	272	70494	15.2838	3.2907	503.009	430	578	165490	25.6541	3.2907	0	px	Intensity	1.13569
Merged	84202.7	4449.73	4085.4	-2520.4	36	203	107.773	97	121	21878	4.72407	3.2907	211.557	173	250	42946	13.7039	3.2907	492.98	420	580	100075	30.3577	3.2907	0	px	Intensity	1.12273
Merged	84202.7	4449.73	4085.4	-2520.4	174	561	107.33	95	120	60212	4.46874	3.2907	204.364	151	265	114648	14.9386	3.2907	502.868	414	583	282109	25.5932	3.2907	0	px	Intensity	1.11805
Merged	84202.7	4449.73	4085.4	-2520.4	164	223	108.462	95	121	24187	4.68273	3.2907	209.816	164	248	46789	14.0976	3.2907	506.87	419	571	113032	22.2963	3.2907	0	px	Intensity	1.1156
Merged	84202.7	4449.73	4085.4	-2520.4	173	244	106.701	96	119	26035	4.70968	3.2907	203.836	159	238	49736	14.1107	3.2907	482.84	391	554	117813	30.0987	3.2907	0	px	Intensity	1.11527
Merged	84202.7	4449.73	4085.4	-2520.4	170	433	106.688	93	117	46196	4.38854	3.2907	195.125	162	237	84489	13.6865	3.2907	426.323	270	574	184598	66.6127	3.2907	0	px	Intensity	1.09665
Merged	84202.7	4449.73	4085.4	-2520.4	32	68	108.926	96	119	7407	4.88525	3.2907	216.132	193	239	14697	11.3539	3.2907	500.029	434	561	34002	25.2702	3.2907	0	px	Intensity	1.09248
Merged	84202.7	4449.73	4085.4	-2520.4	114	188	106.351	94	116	19994	4.44996	3.2907	202.973	167	244	38159	14.226	3.2907	389.388	243	537	73205	72.4626	3.2907	0	px	Intensity	1.09073
Merged	84202.7	4449.73	4085.4	-2520.4	117	120	107.492	98	116	12899	4.38197	3.2907	212.592	171	252	25511	16.5179	3.2907	345.717	194	521	41486	106.163	3.2907	0	px	Intensity	1.07915

## Sheet: L170D-3
FileName	Time (ms)	Z Pos	X Pos	Y Pos	ROI ID	ROI Area	ROI Mean Intensity(Red)	ROI Min Intensity(Red)	ROI Max Intensity(Red)	ROI Sum Intensity(Red)	ROI StDev Intensity(Red)	ROI Signal/Background(Red)	Binary Area(Red)	Binary Mean Intensity(Red)	Binary Min Intensity(Red)	Binary Max Intensity(Red)	Binary Sum Intensity(Red)	Binary StDev Intensity(Red)	Binary Signal/Background(Red)	ROI Mean Intensity(Blue)	ROI Min Intensity(Blue)	ROI Max Intensity(Blue)	ROI Sum Intensity(Blue)	ROI StDev Intensity(Blue)	ROI Signal/Background(Blue)	Binary Area(Blue)	Binary Mean Intensity(Blue)	Binary Min Intensity(Blue)	Binary Max Intensity(Blue)	Binary Sum Intensity(Blue)	Binary StDev Intensity(Blue)	Binary Signal/Background(Blue)	ROI Mean Intensity(Mono)	ROI Min Intensity(Mono)	ROI Max Intensity(Mono)	ROI Sum Intensity(Mono)	ROI StDev Intensity(Mono)	ROI Signal/Background(Mono)	Binary Area(Mono)	Binary Mean Intensity(Mono)	Binary Min Intensity(Mono)	Binary Max Intensity(Mono)	Binary Sum Intensity(Mono)	Binary StDev Intensity(Mono)	Binary Signal/Background(Mono)	Area Fraction	Unit	Channel	red ratio
Merged	36958.2	4452.8	4061.8	-3210.8	245	929	140.539	104	443	130561	38.3927	3.41818	929	140.539	104	443	130561	38.3927	3.52439	460.139	268	619	427469	64.1038	3.41818	929	460.139	268	619	427469	64.1038	3.52439	315.316	165	581	292929	88.6714	3.41818	929	315.316	165	581	292929	88.6714	3.52439	1	px	Intensity	3.15214
Merged	36958.2	4452.8	4061.8	-3210.8	34	1069	128.942	84	382	137839	23.3466	3.41818	1069	128.942	84	382	137839	23.3466	3.52439	411.785	233	657	440198	66.3033	3.41818	1069	411.785	233	657	440198	66.3033	3.52439	417.601	220	1150	446415	127.817	3.41818	1069	417.601	220	1150	446415	127.817	3.52439	1	px	Intensity	2.96257
Merged	36958.2	4452.8	4061.8	-3210.8	215	1356	117.429	96	344	159234	17.1851	3.41818	1356	117.429	96	344	159234	17.1851	3.52439	311.398	175	550	422256	91.4137	3.41818	1356	311.398	175	550	422256	91.4137	3.52439	415.233	232	930	563056	107.82	3.41818	1356	415.233	232	930	563056	107.82	3.52439	1	px	Intensity	2.92942
Merged	36958.2	4452.8	4061.8	-3210.8	346	332	147.678	104	416	49029	46.5788	3.41818	332	147.678	104	416	49029	46.5788	3.52439	582.425	281	852	193365	142.118	3.41818	332	582.425	281	852	193365	142.118	3.52439	305.142	179	519	101307	84.695	3.41818	332	305.142	179	519	101307	84.695	3.52439	1	px	Intensity	2.81695
Merged	36958.2	4452.8	4061.8	-3210.8	87	3720	122.389	89	340	455286	16.576	3.41818	3720	122.389	89	340	455286	16.576	3.52439	342.322	204	618	1273437	67.2058	3.41818	3720	342.322	204	618	1273437	67.2058	3.52439	453.199	206	1328	1685899	212.099	3.41818	3720	453.199	206	1328	1685899	212.099	3.52439	1	px	Intensity	2.77803
Merged	36958.2	4452.8	4061.8	-3210.8	323	637	122.584	94	325	78086	26.4852	3.41818	637	122.584	94	325	78086	26.4852	3.52439	296.039	199	419	188577	40.7508	3.41818	637	296.039	199	419	188577	40.7508	3.52439	303.27	176	528	193183	84.6661	3.41818	637	303.27	176	528	193183	84.6661	3.52439	1	px	Intensity	2.65124
Merged	36958.2	4452.8	4061.8	-3210.8	232	574	133.31	96	334	76520	27.2513	3.41818	574	133.31	96	334	76520	27.2513	3.52439	314.274	190	473	180393	65.6801	3.41818	574	314.274	190	473	180393	65.6801	3.52439	349.233	195	565	200460	88.7117	3.41818	574	349.233	195	565	200460	88.7117	3.52439	1	px	Intensity	2.50544
Merged	36958.2	4452.8	4061.8	-3210.8	198	789	132.712	101	331	104710	25.2015	3.41818	789	132.712	101	331	104710	25.2015	3.52439	511.38	298	748	403479	85.6151	3.41818	789	511.38	298	748	403479	85.6151	3.52439	325.032	197	554	256450	79.0723	3.41818	789	325.032	197	554	256450	79.0723	3.52439	1	px	Intensity	2.49412
Merged	36958.2	4452.8	4061.8	-3210.8	319	526	117.54	95	289	61826	24.0614	3.41818	526	117.54	95	289	61826	24.0614	3.52439	227.392	145	285	119608	17.6571	3.41818	526	227.392	145	285	119608	17.6571	3.52439	309.392	186	537	162740	90.144	3.41818	526	309.392	186	537	162740	90.144	3.52439	1	px	Intensity	2.45874
Merged	36958.2	4452.8	4061.8	-3210.8	327	304	139.931	102	338	42539	38.6832	3.41818	304	139.931	102	338	42539	38.6832	3.52439	347.336	206	517	105590	75.0965	3.41818	304	347.336	206	517	105590	75.0965	3.52439	366.51	236	540	111419	73.3636	3.41818	304	366.51	236	540	111419	73.3636	3.52439	1	px	Intensity	2.41548
Merged	36958.2	4452.8	4061.8	-3210.8	269	457	120.987	92	285	55291	22.3261	3.41818	457	120.987	92	285	55291	22.3261	3.52439	337.956	215	473	154446	58.5163	3.41818	457	337.956	215	473	154446	58.5163	3.52439	344.53	223	557	157450	71.4913	3.41818	457	344.53	223	557	157450	71.4913	3.52439	1	px	Intensity	2.35563
Merged	36958.2	4452.8	4061.8	-3210.8	53	696	139.833	102	328	97324	27.2487	3.41818	696	139.833	102	328	97324	27.2487	3.52439	415.068	215	732	288887	120.709	3.41818	696	415.068	215	732	288887	120.709	3.52439	310.341	178	574	215997	82.8336	3.41818	696	310.341	178	574	215997	82.8336	3.52439	1	px	Intensity	2.34565
Merged	36958.2	4452.8	4061.8	-3210.8	265	1269	122.264	82	286	155153	18.9581	3.41818	1269	122.264	82	286	155153	18.9581	3.52439	270.983	209	369	343877	23.9356	3.41818	1269	270.983	209	369	343877	23.9356	3.52439	369.243	173	1042	468569	132.814	3.41818	1269	369.243	173	1042	468569	132.814	3.52439	1	px	Intensity	2.3392
Merged	36958.2	4452.8	4061.8	-3210.8	142	1452	119.61	91	277	173674	14.2768	3.41818	1452	119.61	91	277	173674	14.2768	3.52439	278.267	201	388	404043	34.3826	3.41818	1452	278.267	201	388	404043	34.3826	3.52439	329.868	174	568	478968	86.3769	3.41818	1452	329.868	174	568	478968	86.3769	3.52439	1	px	Intensity	2.31586
Merged	36958.2	4452.8	4061.8	-3210.8	337	372	132.981	88	306	49469	30.0096	3.41818	372	132.981	88	306	49469	30.0096	3.52439	406.734	197	647	151305	124.051	3.41818	372	406.734	197	647	151305	124.051	3.52439	365.231	210	545	135866	78.1353	3.41818	372	365.231	210	545	135866	78.1353	3.52439	1	px	Intensity	2.30108
Merged	36958.2	4452.8	4061.8	-3210.8	296	685	115.625	90	263	79203	18.1507	3.41818	685	115.625	90	263	79203	18.1507	3.52439	253.505	190	315	173651	23.0002	3.41818	685	253.505	190	315	173651	23.0002	3.52439	315.015	195	554	215785	80.6819	3.41818	685	315.015	195	554	215785	80.6819	3.52439	1	px	Intensity	2.2746
Merged	36958.2	4452.8	4061.8	-3210.8	153	424	131.875	98	296	55915	25.0718	3.41818	424	131.875	98	296	55915	25.0718	3.52439	497.847	227	768	211087	146.821	3.41818	424	497.847	227	768	211087	146.821	3.52439	347.382	226	558	147290	77.6148	3.41818	424	347.382	226	558	147290	77.6148	3.52439	1	px	Intensity	2.24455
Merged	36958.2	4452.8	4061.8	-3210.8	348	385	129.927	72	286	50022	26.6565	3.41818	385	129.927	72	286	50022	26.6565	3.52439	434.831	240	607	167410	97.1681	3.41818	385	434.831	240	607	167410	97.1681	3.52439	308.519	196	520	118780	87.126	3.41818	385	308.519	196	520	118780	87.126	3.52439	1	px	Intensity	2.20123
Merged	36958.2	4452.8	4061.8	-3210.8	340	738	118.405	91	259	87383	17.1032	3.41818	738	118.405	91	259	87383	17.1032	3.52439	295.201	180	463	217858	62.8195	3.41818	738	295.201	180	463	217858	62.8195	3.52439	340.946	216	552	251618	72.6323	3.41818	738	340.946	216	552	251618	72.6323	3.52439	1	px	Intensity	2.1874
Merged	36958.2	4452.8	4061.8	-3210.8	179	443	138.307	102	296	61270	25.7226	3.41818	443	138.307	102	296	61270	25.7226	3.52439	516.302	245	856	228722	205.017	3.41818	443	516.302	245	856	228722	205.017	3.52439	432.754	294	558	191710	50.3734	3.41818	443	432.754	294	558	191710	50.3734	3.52439	1	px	Intensity	2.14017
Merged	36958.2	4452.8	4061.8	-3210.8	143	372	116.293	94	247	43261	16.6205	3.41818	372	116.293	94	247	43261	16.6205	3.52439	230.93	182	279	85906	17.4466	3.41818	372	230.93	182	279	85906	17.4466	3.52439	328.669	207	519	122265	80.8984	3.41818	372	328.669	207	519	122265	80.8984	3.52439	1	px	Intensity	2.12395
Merged	36958.2	4452.8	4061.8	-3210.8	281	1197	116.881	79	248	139906	13.421	3.41818	1197	116.881	79	248	139906	13.421	3.52439	303.114	205	434	362828	45.2315	3.41818	1197	303.114	205	434	362828	45.2315	3.52439	342.066	225	536	409453	68.6219	3.41818	1197	342.066	225	536	409453	68.6219	3.52439	1	px	Intensity	2.12182
Merged	36958.2	4452.8	4061.8	-3210.8	160	363	121.449	94	255	44086	18.4169	3.41818	363	121.449	94	255	44086	18.4169	3.52439	327.132	214	425	118749	36.5877	3.41818	363	327.132	214	425	118749	36.5877	3.52439	336.072	211	610	121994	84.2886	3.41818	363	336.072	211	610	121994	84.2886	3.52439	1	px	Intensity	2.09965
Merged	36958.2	4452.8	4061.8	-3210.8	342	1230	116.388	77	241	143157	12.7107	3.41818	1230	116.388	77	241	143157	12.7107	3.52439	293.244	191	502	360690	56.0883	3.41818	1230	293.244	191	502	360690	56.0883	3.52439	336.763	205	743	414219	82.6078	3.41818	1230	336.763	205	743	414219	82.6078	3.52439	1	px	Intensity	2.07066
Merged	36958.2	4452.8	4061.8	-3210.8	69	509	115.896	93	238	58991	18.3118	3.41818	509	115.896	93	238	58991	18.3118	3.52439	257.452	187	325	131043	27.0938	3.41818	509	257.452	187	325	131043	27.0938	3.52439	321.711	178	519	163751	77.9072	3.41818	509	321.711	178	519	163751	77.9072	3.52439	1	px	Intensity	2.05357
Merged	36958.2	4452.8	4061.8	-3210.8	191	995	113.873	83	233	113304	13.2367	3.41818	995	113.873	83	233	113304	13.2367	3.52439	234.437	181	286	233265	16.7229	3.41818	995	234.437	181	286	233265	16.7229	3.52439	310.947	164	552	309392	91.4447	3.41818	995	310.947	164	552	309392	91.4447	3.52439	1	px	Intensity	2.04613
Merged	36958.2	4452.8	4061.8	-3210.8	38	1165	127.488	95	257	148523	15.1236	3.41818	1165	127.488	95	257	148523	15.1236	3.52439	403.627	248	652	470226	78.9225	3.41818	1165	403.627	248	652	470226	78.9225	3.52439	372.664	207	661	434153	81.2681	3.41818	1165	372.664	207	661	434153	81.2681	3.52439	1	px	Intensity	2.01588
Merged	36958.2	4452.8	4061.8	-3210.8	109	2009	122.94	87	246	246986	13.2686	3.41818	2009	122.94	87	246	246986	13.2686	3.52439	328.622	219	547	660201	59.5308	3.41818	2009	328.622	219	547	660201	59.5308	3.52439	362.385	186	1012	728031	105.845	3.41818	2009	362.385	186	1012	728031	105.845	3.52439	1	px	Intensity	2.00098
Merged	36958.2	4452.8	4061.8	-3210.8	225	1658	131.024	98	262	217238	15.5746	3.41818	1658	131.024	98	262	217238	15.5746	3.52439	439.571	245	789	728809	109.888	3.41818	1658	439.571	245	789	728809	109.888	3.52439	374.744	177	804	621326	94.86	3.41818	1658	374.744	177	804	621326	94.86	3.52439	1	px	Intensity	1.99963
Merged	36958.2	4452.8	4061.8	-3210.8	151	512	115.611	87	229	59193	16.3303	3.41818	512	115.611	87	229	59193	16.3303	3.52439	221.879	181	269	113602	15.6123	3.41818	512	221.879	181	269	113602	15.6123	3.52439	348.434	222	555	178398	81.9007	3.41818	512	348.434	222	555	178398	81.9007	3.52439	1	px	Intensity	1.98077
Merged	36958.2	4452.8	4061.8	-3210.8	343	1575	115.25	90	228	181518	9.89327	3.41818	1575	115.25	90	228	181518	9.89327	3.52439	317.89	186	536	500676	73.0281	3.41818	1575	317.89	186	536	500676	73.0281	3.52439	353.137	174	632	556190	79.7609	3.41818	1575	353.137	174	632	556190	79.7609	3.52439	1	px	Intensity	1.97832
Merged	36958.2	4452.8	4061.8	-3210.8	133	311	121.228	96	238	37702	20.6075	3.41818	311	121.228	96	238	37702	20.6075	3.52439	239.299	177	283	74422	18.2774	3.41818	311	239.299	177	283	74422	18.2774	3.52439	319.714	192	535	99431	79.8069	3.41818	311	319.714	192	535	99431	79.8069	3.52439	1	px	Intensity	1.96324
Merged	36958.2	4452.8	4061.8	-3210.8	102	464	125.438	78	246	58203	19.196	3.41818	464	125.438	78	246	58203	19.196	3.52439	380.019	235	556	176329	69.5243	3.41818	464	380.019	235	556	176329	69.5243	3.52439	322.418	208	551	149602	81.2428	3.41818	464	322.418	208	551	149602	81.2428	3.52439	1	px	Intensity	1.96114
Merged	36958.2	4452.8	4061.8	-3210.8	162	985	118.342	94	232	116567	13.0532	3.41818	985	118.342	94	232	116567	13.0532	3.52439	286.602	198	415	282303	35.6143	3.41818	985	286.602	198	415	282303	35.6143	3.52439	335.928	203	589	330889	80.1052	3.41818	985	335.928	203	589	330889	80.1052	3.52439	1	px	Intensity	1.96042
Merged	36958.2	4452.8	4061.8	-3210.8	202	973	137.44	96	269	133729	19.8369	3.41818	973	137.44	96	269	133729	19.8369	3.52439	595.984	313	1314	579892	202.389	3.41818	973	595.984	313	1314	579892	202.389	3.52439	395.946	202	1274	385255	168.689	3.41818	973	395.946	202	1274	385255	168.689	3.52439	1	px	Intensity	1.95722
Merged	36958.2	4452.8	4061.8	-3210.8	177	941	122.772	95	238	115528	13.0461	3.41818	941	122.772	95	238	115528	13.0461	3.52439	383.596	238	649	360964	87.9837	3.41818	941	383.596	238	649	360964	87.9837	3.52439	345.104	179	588	324743	87.0804	3.41818	941	345.104	179	588	324743	87.0804	3.52439	1	px	Intensity	1.93856
Merged	36958.2	4452.8	4061.8	-3210.8	273	1366	112.331	90	217	153444	10.3176	3.41818	1366	112.331	90	217	153444	10.3176	3.52439	245.633	186	307	335534	20.0622	3.41818	1366	245.633	186	307	335534	20.0622	3.52439	358.6	218	914	489847	95.9997	3.41818	1366	358.6	218	914	489847	95.9997	3.52439	1	px	Intensity	1.93179
Merged	36958.2	4452.8	4061.8	-3210.8	41	874	123.267	98	238	107735	15.1051	3.41818	874	123.267	98	238	107735	15.1051	3.52439	401.253	206	715	350695	121.981	3.41818	874	401.253	206	715	350695	121.981	3.52439	310.382	178	558	271274	85.6442	3.41818	874	310.382	178	558	271274	85.6442	3.52439	1	px	Intensity	1.93077
Merged	36958.2	4452.8	4061.8	-3210.8	221	740	115.5	97	223	85470	14.6373	3.41818	740	115.5	97	223	85470	14.6373	3.52439	273.209	186	420	202175	43.6445	3.41818	740	273.209	186	420	202175	43.6445	3.52439	305.63	180	539	226166	85.8467	3.41818	740	305.63	180	539	226166	85.8467	3.52439	1	px	Intensity	1.93074
Merged	36958.2	4452.8	4061.8	-3210.8	275	651	115.704	95	223	75323	15.5717	3.41818	651	115.704	95	223	75323	15.5717	3.52439	303.906	203	422	197843	48.8765	3.41818	651	303.906	203	422	197843	48.8765	3.52439	373	258	574	242823	67.2404	3.41818	651	373	258	574	242823	67.2404	3.52439	1	px	Intensity	1.92734
Merged	36958.2	4452.8	4061.8	-3210.8	52	597	122.3	99	235	73013	17.2607	3.41818	597	122.3	99	235	73013	17.2607	3.52439	378.394	214	533	225901	70.5008	3.41818	597	378.394	214	533	225901	70.5008	3.52439	321.645	210	550	192022	76.4327	3.41818	597	321.645	210	550	192022	76.4327	3.52439	1	px	Intensity	1.92151
Merged	36958.2	4452.8	4061.8	-3210.8	277	2031	125.596	88	241	255085	18.4747	3.41818	2031	125.596	88	241	255085	18.4747	3.52439	518.723	226	1333	1053526	266.679	3.41818	2031	518.723	226	1333	1053526	266.679	3.52439	402.795	226	1179	818076	135.223	3.41818	2031	402.795	226	1179	818076	135.223	3.52439	1	px	Intensity	1.91885
Merged	36958.2	4452.8	4061.8	-3210.8	121	424	114.809	99	218	48679	15.3706	3.41818	424	114.809	99	218	48679	15.3706	3.52439	220.59	173	275	93530	16.1551	3.41818	424	220.59	173	275	93530	16.1551	3.52439	325.658	211	538	138079	75.2137	3.41818	424	325.658	211	538	138079	75.2137	3.52439	1	px	Intensity	1.89881
Merged	36958.2	4452.8	4061.8	-3210.8	228	708	115.403	96	219	81705	14.1541	3.41818	708	115.403	96	219	81705	14.1541	3.52439	264.521	185	336	187281	27.133	3.41818	708	264.521	185	336	187281	27.133	3.52439	333.329	226	531	235997	71.7619	3.41818	708	333.329	226	531	235997	71.7619	3.52439	1	px	Intensity	1.89771
Merged	36958.2	4452.8	4061.8	-3210.8	32	593	116.459	96	218	69060	15.3766	3.41818	593	116.459	96	218	69060	15.3766	3.52439	293.902	212	395	174284	36.8187	3.41818	593	293.902	212	395	174284	36.8187	3.52439	320.55	199	569	190086	85.0562	3.41818	593	320.55	199	569	190086	85.0562	3.52439	1	px	Intensity	1.87191
Merged	36958.2	4452.8	4061.8	-3210.8	331	1014	119.674	91	221	121349	12.4223	3.41818	1014	119.674	91	221	121349	12.4223	3.52439	341.158	247	453	345934	37.1004	3.41818	1014	341.158	247	453	345934	37.1004	3.52439	361.086	191	584	366141	79.3666	3.41818	1014	361.086	191	584	366141	79.3666	3.52439	1	px	Intensity	1.84669
Merged	36958.2	4452.8	4061.8	-3210.8	282	519	115.938	95	212	60172	14.3079	3.41818	519	115.938	95	212	60172	14.3079	3.52439	283.663	195	375	147221	33.5825	3.41818	519	283.663	195	375	147221	33.5825	3.52439	336.482	229	519	174634	75.0613	3.41818	519	336.482	229	519	174634	75.0613	3.52439	1	px	Intensity	1.82856
Merged	36958.2	4452.8	4061.8	-3210.8	80	598	121.736	97	222	72798	13.7404	3.41818	598	121.736	97	222	72798	13.7404	3.52439	368.577	250	477	220409	45.2561	3.41818	598	368.577	250	477	220409	45.2561	3.52439	370.199	230	584	221379	72.5834	3.41818	598	370.199	230	584	221379	72.5834	3.52439	1	px	Intensity	1.82362
Merged	36958.2	4452.8	4061.8	-3210.8	219	246	163.988	114	294	40341	32.4764	3.41818	246	163.988	114	294	40341	32.4764	3.52439	788.882	483	1095	194065	151.664	3.41818	246	788.882	483	1095	194065	151.664	3.52439	324.268	187	519	79770	96.4784	3.41818	246	324.268	187	519	79770	96.4784	3.52439	1	px	Intensity	1.79282
Merged	36958.2	4452.8	4061.8	-3210.8	197	987	120.059	96	215	118498	13.5775	3.41818	987	120.059	96	215	118498	13.5775	3.52439	329.977	199	473	325687	41.1591	3.41818	987	329.977	199	473	325687	41.1591	3.52439	379.44	197	557	374507	81.9084	3.41818	987	379.44	197	557	374507	81.9084	3.52439	1	px	Intensity	1.79079
Merged	36958.2	4452.8	4061.8	-3210.8	75	899	136.453	92	244	122671	20.1664	3.41818	899	136.453	92	244	122671	20.1664	3.52439	598.622	253	1082	538161	216.731	3.41818	899	598.622	253	1082	538161	216.731	3.52439	332.657	198	543	299059	73.1736	3.41818	899	332.657	198	543	299059	73.1736	3.52439	1	px	Intensity	1.78817
Merged	36958.2	4452.8	4061.8	-3210.8	236	980	110.362	86	196	108155	8.32701	3.41818	980	110.362	86	196	108155	8.32701	3.52439	222.468	177	283	218019	15.7	3.41818	980	222.468	177	283	218019	15.7	3.52439	337.872	226	543	331115	71.6843	3.41818	980	337.872	226	543	331115	71.6843	3.52439	1	px	Intensity	1.77597
Merged	36958.2	4452.8	4061.8	-3210.8	310	853	118.305	90	208	100914	12.0939	3.41818	853	118.305	90	208	100914	12.0939	3.52439	300.084	212	416	255972	34.891	3.41818	853	300.084	212	416	255972	34.891	3.52439	297.529	167	536	253792	92.7387	3.41818	853	297.529	167	536	253792	92.7387	3.52439	1	px	Intensity	1.75817
Merged	36958.2	4452.8	4061.8	-3210.8	70	452	116.471	99	203	52645	13.9162	3.41818	452	116.471	99	203	52645	13.9162	3.52439	223.321	179	271	100941	15.3623	3.41818	452	223.321	179	271	100941	15.3623	3.52439	307.535	181	518	139006	91.459	3.41818	452	307.535	181	518	139006	91.459	3.52439	1	px	Intensity	1.74292
Merged	36958.2	4452.8	4061.8	-3210.8	205	257	113.463	97	193	29160	15.2255	3.41818	257	113.463	97	193	29160	15.2255	3.52439	211.432	176	255	54338	13.6988	3.41818	257	211.432	176	255	54338	13.6988	3.52439	382.942	264	529	98416	68.1772	3.41818	257	382.942	264	529	98416	68.1772	3.52439	1	px	Intensity	1.70099
Merged	36958.2	4452.8	4061.8	-3210.8	317	1398	119.511	96	203	167076	11.5069	3.41818	1398	119.511	96	203	167076	11.5069	3.52439	388.753	214	857	543477	142.727	3.41818	1398	388.753	214	857	543477	142.727	3.52439	315.137	182	529	440561	81.0548	3.41818	1398	315.137	182	529	440561	81.0548	3.52439	1	px	Intensity	1.69859
Merged	36958.2	4452.8	4061.8	-3210.8	27	937	120.652	87	203	113051	12.7485	3.41818	937	120.652	87	203	113051	12.7485	3.52439	334.239	222	423	313182	33.1421	3.41818	937	334.239	222	423	313182	33.1421	3.52439	346.362	205	619	324541	83.6997	3.41818	937	346.362	205	619	324541	83.6997	3.52439	1	px	Intensity	1.68252
Merged	36958.2	4452.8	4061.8	-3210.8	140	380	129.158	104	216	49080	15.3491	3.41818	380	129.158	104	216	49080	15.3491	3.52439	510.479	292	726	193982	105.362	3.41818	380	510.479	292	726	193982	105.362	3.52439	306.847	175	531	116602	99.6641	3.41818	380	306.847	175	531	116602	99.6641	3.52439	1	px	Intensity	1.67237
Merged	36958.2	4452.8	4061.8	-3210.8	92	912	120.338	89	201	109748	13.593	3.41818	912	120.338	89	201	109748	13.593	3.52439	264.135	186	376	240891	32.9522	3.41818	912	264.135	186	376	240891	32.9522	3.52439	314.212	183	543	286561	93.2838	3.41818	912	314.212	183	543	286561	93.2838	3.52439	1	px	Intensity	1.6703
Merged	36958.2	4452.8	4061.8	-3210.8	305	635	121.687	98	203	77271	12.3123	3.41818	635	121.687	98	203	77271	12.3123	3.52439	405.743	240	559	257647	70.5978	3.41818	635	405.743	240	559	257647	70.5978	3.52439	305.272	186	519	193848	83.6624	3.41818	635	305.272	186	519	193848	83.6624	3.52439	1	px	Intensity	1.66822
Merged	36958.2	4452.8	4061.8	-3210.8	212	1496	118.069	89	196	176631	11.525	3.41818	1496	118.069	89	196	176631	11.525	3.52439	331.462	190	619	495867	91.1847	3.41818	1496	331.462	190	619	495867	91.1847	3.52439	347.687	185	847	520140	100.105	3.41818	1496	347.687	185	847	520140	100.105	3.52439	1	px	Intensity	1.66005
Merged	36958.2	4452.8	4061.8	-3210.8	125	1258	116.911	92	194	147074	10.5441	3.41818	1258	116.911	92	194	147074	10.5441	3.52439	292.037	200	412	367382	36.2774	3.41818	1258	292.037	200	412	367382	36.2774	3.52439	336.83	200	629	423732	89.3613	3.41818	1258	336.83	200	629	423732	89.3613	3.52439	1	px	Intensity	1.65938
Merged	36958.2	4452.8	4061.8	-3210.8	218	1617	115.084	95	190	186091	8.48251	3.41818	1617	115.084	95	190	186091	8.48251	3.52439	304.068	194	495	491678	59.4573	3.41818	1617	304.068	194	495	491678	59.4573	3.52439	381.998	230	575	617690	71.593	3.41818	1617	381.998	230	575	617690	71.593	3.52439	1	px	Intensity	1.65097
Merged	36958.2	4452.8	4061.8	-3210.8	182	332	134.575	105	220	44679	18.0484	3.41818	332	134.575	105	220	44679	18.0484	3.52439	588.789	336	985	195478	149.414	3.41818	332	588.789	336	985	195478	149.414	3.52439	342.858	191	533	113829	87.5524	3.41818	332	342.858	191	533	113829	87.5524	3.52439	1	px	Intensity	1.63477
Merged	36958.2	4452.8	4061.8	-3210.8	223	1339	115.095	87	188	154112	11.4135	3.41818	1339	115.095	87	188	154112	11.4135	3.52439	250.765	179	321	335775	19.9775	3.41818	1339	250.765	179	321	335775	19.9775	3.52439	326.172	187	613	436744	81.1548	3.41818	1339	326.172	187	613	436744	81.1548	3.52439	1	px	Intensity	1.63344
Merged	36958.2	4452.8	4061.8	-3210.8	60	2011	113.704	86	184	228658	8.10055	3.41818	2011	113.704	86	184	228658	8.10055	3.52439	270.888	195	371	544755	28.7094	3.41818	2011	270.888	195	371	544755	28.7094	3.52439	361.434	191	1139	726843	112.609	3.41818	2011	361.434	191	1139	726843	112.609	3.52439	1	px	Intensity	1.61824
Merged	36958.2	4452.8	4061.8	-3210.8	293	1314	127.974	90	207	168158	20.6319	3.41818	1314	127.974	90	207	168158	20.6319	3.52439	612.538	210	1710	804875	375.855	3.41818	1314	612.538	210	1710	804875	375.855	3.52439	358.043	222	709	470469	78.2677	3.41818	1314	358.043	222	709	470469	78.2677	3.52439	1	px	Intensity	1.61751
Merged	36958.2	4452.8	4061.8	-3210.8	127	1263	113.874	91	183	143823	9.30956	3.41818	1263	113.874	91	183	143823	9.30956	3.52439	266.663	188	398	336795	49.2155	3.41818	1263	266.663	188	398	336795	49.2155	3.52439	343.247	211	626	433521	70.2767	3.41818	1263	343.247	211	626	433521	70.2767	3.52439	1	px	Intensity	1.60704
Merged	36958.2	4452.8	4061.8	-3210.8	279	483	115.348	93	185	55713	11.6996	3.41818	483	115.348	93	185	55713	11.6996	3.52439	274.201	184	363	132439	33.3175	3.41818	483	274.201	184	363	132439	33.3175	3.52439	299.845	170	546	144825	93.9128	3.41818	483	299.845	170	546	144825	93.9128	3.52439	1	px	Intensity	1.60384
Merged	36958.2	4452.8	4061.8	-3210.8	226	1008	118.364	95	189	119311	10.6437	3.41818	1008	118.364	95	189	119311	10.6437	3.52439	316.616	225	429	319149	34.8623	3.41818	1008	316.616	225	429	319149	34.8623	3.52439	335.664	178	587	338349	90.8173	3.41818	1008	335.664	178	587	338349	90.8173	3.52439	1	px	Intensity	1.59677
Merged	36958.2	4452.8	4061.8	-3210.8	193	870	113.515	95	181	98758	9.43733	3.41818	870	113.515	95	181	98758	9.43733	3.52439	241.976	173	295	210519	18.732	3.41818	870	241.976	173	295	210519	18.732	3.52439	326.078	192	524	283688	76.7727	3.41818	870	326.078	192	524	283688	76.7727	3.52439	1	px	Intensity	1.5945
Merged	36958.2	4452.8	4061.8	-3210.8	272	1122	121.043	96	193	135810	11.6461	3.41818	1122	121.043	96	193	135810	11.6461	3.52439	388.761	231	563	436190	70.183	3.41818	1122	388.761	231	563	436190	70.183	3.52439	376.116	183	1220	422002	168.739	3.41818	1122	376.116	183	1220	422002	168.739	3.52439	1	px	Intensity	1.59448
Merged	36958.2	4452.8	4061.8	-3210.8	286	485	112.48	91	179	54553	10.3389	3.41818	485	112.48	91	179	54553	10.3389	3.52439	228.074	180	286	110616	16.4161	3.41818	485	228.074	180	286	110616	16.4161	3.52439	313.88	205	559	152232	83.225	3.41818	485	313.88	205	559	152232	83.225	3.52439	1	px	Intensity	1.59139
Merged	36958.2	4452.8	4061.8	-3210.8	176	772	112.456	89	178	86816	7.14306	3.41818	772	112.456	89	178	86816	7.14306	3.52439	266.11	191	360	205437	31.325	3.41818	772	266.11	191	360	205437	31.325	3.52439	337.412	215	519	260482	70.694	3.41818	772	337.412	215	519	260482	70.694	3.52439	1	px	Intensity	1.58284
Merged	36958.2	4452.8	4061.8	-3210.8	29	359	115.301	94	182	41393	12.6524	3.41818	359	115.301	94	182	41393	12.6524	3.52439	225.513	177	273	80959	18.7043	3.41818	359	225.513	177	273	80959	18.7043	3.52439	327.421	192	532	117544	87.0467	3.41818	359	327.421	192	532	117544	87.0467	3.52439	1	px	Intensity	1.57848
Merged	36958.2	4452.8	4061.8	-3210.8	141	467	114.621	97	178	53528	11.2537	3.41818	467	114.621	97	178	53528	11.2537	3.52439	243.702	205	292	113809	16.7424	3.41818	467	243.702	205	292	113809	16.7424	3.52439	315.278	188	528	147235	89.5845	3.41818	467	315.278	188	528	147235	89.5845	3.52439	1	px	Intensity	1.55294
Merged	36958.2	4452.8	4061.8	-3210.8	351	1034	116.229	90	180	120181	11.1	3.41818	1034	116.229	90	180	120181	11.1	3.52439	316.784	196	465	327555	62.4444	3.41818	1034	316.784	196	465	327555	62.4444	3.52439	328.029	191	524	339182	77.5257	3.41818	1034	328.029	191	524	339182	77.5257	3.52439	1	px	Intensity	1.54866
Merged	36958.2	4452.8	4061.8	-3210.8	230	363	114.066	75	176	41406	9.9906	3.41818	363	114.066	75	176	41406	9.9906	3.52439	276.309	200	351	100300	29.5451	3.41818	363	276.309	200	351	100300	29.5451	3.52439	334.289	222	530	121347	74.6368	3.41818	363	334.289	222	530	121347	74.6368	3.52439	1	px	Intensity	1.54296
Merged	36958.2	4452.8	4061.8	-3210.8	194	825	112.216	89	173	92578	9.55915	3.41818	825	112.216	89	173	92578	9.55915	3.52439	229.76	180	295	189552	20.146	3.41818	825	229.76	180	295	189552	20.146	3.52439	344.559	177	548	284261	84.2916	3.41818	825	344.559	177	548	284261	84.2916	3.52439	1	px	Intensity	1.54167
Merged	36958.2	4452.8	4061.8	-3210.8	138	815	116.92	89	180	95290	11.6967	3.41818	815	116.92	89	180	95290	11.6967	3.52439	286.639	177	449	233611	58.1954	3.41818	815	286.639	177	449	233611	58.1954	3.52439	350.561	205	575	285707	76.9107	3.41818	815	350.561	205	575	285707	76.9107	3.52439	1	px	Intensity	1.53951
Merged	36958.2	4452.8	4061.8	-3210.8	289	827	114.994	97	177	95100	9.18567	3.41818	827	114.994	97	177	95100	9.18567	3.52439	283.459	177	512	234421	72.2802	3.41818	827	283.459	177	512	234421	72.2802	3.52439	316.781	196	518	261978	77.1888	3.41818	827	316.781	196	518	261978	77.1888	3.52439	1	px	Intensity	1.53921
Merged	36958.2	4452.8	4061.8	-3210.8	110	471	113.187	76	174	53311	11.4845	3.41818	471	113.187	76	174	53311	11.4845	3.52439	242.403	167	317	114172	23.3773	3.41818	471	242.403	167	317	114172	23.3773	3.52439	358.858	231	557	169022	74.5122	3.41818	471	358.858	231	557	169022	74.5122	3.52439	1	px	Intensity	1.53728
Merged	36958.2	4452.8	4061.8	-3210.8	307	442	112.921	94	173	49911	8.91087	3.41818	442	112.921	94	173	49911	8.91087	3.52439	262.484	194	349	116018	26.6794	3.41818	442	262.484	194	349	116018	26.6794	3.52439	301.982	175	538	133476	99.329	3.41818	442	301.982	175	538	133476	99.329	3.52439	1	px	Intensity	1.53205
Merged	36958.2	4452.8	4061.8	-3210.8	224	409	112.406	91	172	45974	7.01259	3.41818	409	112.406	91	172	45974	7.01259	3.52439	256.922	202	319	105081	23.8223	3.41818	409	256.922	202	319	105081	23.8223	3.52439	316.756	176	558	129553	92.2715	3.41818	409	316.756	176	558	129553	92.2715	3.52439	1	px	Intensity	1.53017
Merged	36958.2	4452.8	4061.8	-3210.8	274	488	112.66	96	172	54978	9.05743	3.41818	488	112.66	96	172	54978	9.05743	3.52439	251.338	182	317	122653	21.2564	3.41818	488	251.338	182	317	122653	21.2564	3.52439	373.992	245	594	182508	72.0885	3.41818	488	373.992	245	594	182508	72.0885	3.52439	1	px	Intensity	1.52672
Merged	36958.2	4452.8	4061.8	-3210.8	88	423	112.558	87	171	47612	9.00882	3.41818	423	112.558	87	171	47612	9.00882	3.52439	225.253	181	273	95282	15.1925	3.41818	423	225.253	181	273	95282	15.1925	3.52439	319.738	183	546	135249	86.7416	3.41818	423	319.738	183	546	135249	86.7416	3.52439	1	px	Intensity	1.51922
Merged	36958.2	4452.8	4061.8	-3210.8	173	568	157.419	122	239	89414	17.4509	3.41818	568	157.419	122	239	89414	17.4509	3.52439	954.919	531	1248	542394	141.863	3.41818	568	954.919	531	1248	542394	141.863	3.52439	381.6	189	711	216749	102.071	3.41818	568	381.6	189	711	216749	102.071	3.52439	1	px	Intensity	1.51824
Merged	36958.2	4452.8	4061.8	-3210.8	292	468	117.004	95	177	54758	9.92186	3.41818	468	117.004	95	177	54758	9.92186	3.52439	293.739	203	367	137470	29.255	3.41818	468	293.739	203	367	137470	29.255	3.52439	341.079	173	526	159625	99.2683	3.41818	468	341.079	173	526	159625	99.2683	3.52439	1	px	Intensity	1.51277
Merged	36958.2	4452.8	4061.8	-3210.8	312	311	123.926	91	187	38541	12.0534	3.41818	311	123.926	91	187	38541	12.0534	3.52439	337.759	245	463	105043	38.0452	3.41818	311	337.759	245	463	105043	38.0452	3.52439	340.122	216	545	105778	84.5321	3.41818	311	340.122	216	545	105778	84.5321	3.52439	1	px	Intensity	1.50896
Merged	36958.2	4452.8	4061.8	-3210.8	91	806	112.037	95	168	90302	8.00435	3.41818	806	112.037	95	168	90302	8.00435	3.52439	208.381	170	246	167955	13.5259	3.41818	806	208.381	170	246	167955	13.5259	3.52439	346.315	216	553	279130	79.483	3.41818	806	346.315	216	553	279130	79.483	3.52439	1	px	Intensity	1.4995
Merged	36958.2	4452.8	4061.8	-3210.8	147	1192	112.752	87	167	134400	8.5751	3.41818	1192	112.752	87	167	134400	8.5751	3.52439	221.234	170	279	263711	16.9262	3.41818	1192	221.234	170	279	263711	16.9262	3.52439	364.762	217	664	434796	82.8412	3.41818	1192	364.762	217	664	434796	82.8412	3.52439	1	px	Intensity	1.48113
Merged	36958.2	4452.8	4061.8	-3210.8	311	690	112.87	93	166	77880	7.17013	3.41818	690	112.87	93	166	77880	7.17013	3.52439	268.052	202	342	184956	23.5303	3.41818	690	268.052	202	342	184956	23.5303	3.52439	296.942	176	547	204890	90.1864	3.41818	690	296.942	176	547	204890	90.1864	3.52439	1	px	Intensity	1.47072
Merged	36958.2	4452.8	4061.8	-3210.8	349	964	112.631	76	165	108576	7.802	3.41818	964	112.631	76	165	108576	7.802	3.52439	269.166	190	373	259476	39.8248	3.41818	964	269.166	190	373	259476	39.8248	3.52439	359.263	237	572	346330	68.2079	3.41818	964	359.263	237	572	346330	68.2079	3.52439	1	px	Intensity	1.46496
Merged	36958.2	4452.8	4061.8	-3210.8	306	1133	123.565	101	181	139999	11.0785	3.41818	1133	123.565	101	181	139999	11.0785	3.52439	417.788	263	728	473354	96.1165	3.41818	1133	417.788	263	728	473354	96.1165	3.52439	351.321	193	571	398047	84.4635	3.41818	1133	351.321	193	571	398047	84.4635	3.52439	1	px	Intensity	1.46482
Merged	36958.2	4452.8	4061.8	-3210.8	240	332	113.337	93	165	37628	10.3607	3.41818	332	113.337	93	165	37628	10.3607	3.52439	242.298	196	286	80443	18.8859	3.41818	332	242.298	196	286	80443	18.8859	3.52439	329.193	216	527	109292	72.1971	3.41818	332	329.193	216	527	109292	72.1971	3.52439	1	px	Intensity	1.45583
Merged	36958.2	4452.8	4061.8	-3210.8	137	1338	120.333	93	175	161006	9.8569	3.41818	1338	120.333	93	175	161006	9.8569	3.52439	342.553	206	513	458336	53.6609	3.41818	1338	342.553	206	513	458336	53.6609	3.52439	339.596	186	911	454380	111.926	3.41818	1338	339.596	186	911	454380	111.926	3.52439	1	px	Intensity	1.45429
Merged	36958.2	4452.8	4061.8	-3210.8	26	1320	111.525	80	162	147213	7.29571	3.41818	1320	111.525	80	162	147213	7.29571	3.52439	240.168	177	318	317022	23.853	3.41818	1320	240.168	177	318	317022	23.853	3.52439	334.143	193	691	441069	83.4182	3.41818	1320	334.143	193	691	441069	83.4182	3.52439	1	px	Intensity	1.45259
Merged	36958.2	4452.8	4061.8	-3210.8	333	932	111.999	92	162	104383	7.54272	3.41818	932	111.999	92	162	104383	7.54272	3.52439	227.683	168	308	212201	21.4489	3.41818	932	227.683	168	308	212201	21.4489	3.52439	374.462	179	581	348999	91.8969	3.41818	932	374.462	179	581	348999	91.8969	3.52439	1	px	Intensity	1.44644
Merged	36958.2	4452.8	4061.8	-3210.8	63	1047	121.205	94	175	126902	13.8795	3.41818	1047	121.205	94	175	126902	13.8795	3.52439	405.467	205	847	424524	180.443	3.41818	1047	405.467	205	847	424524	180.443	3.52439	344.681	180	564	360881	85.9501	3.41818	1047	344.681	180	564	360881	85.9501	3.52439	1	px	Intensity	1.44383
Merged	36958.2	4452.8	4061.8	-3210.8	62	373	113.646	97	164	42390	9.27681	3.41818	373	113.646	97	164	42390	9.27681	3.52439	229.472	178	273	85593	15.8733	3.41818	373	229.472	178	273	85593	15.8733	3.52439	327.78	190	519	122262	84.721	3.41818	373	327.78	190	519	122262	84.721	3.52439	1	px	Intensity	1.44308
Merged	36958.2	4452.8	4061.8	-3210.8	206	1171	124.057	78	178	145271	13.2332	3.41818	1171	124.057	78	178	145271	13.2332	3.52439	455.518	218	810	533411	184.869	3.41818	1171	455.518	218	810	533411	184.869	3.52439	381.477	239	597	446710	68.5988	3.41818	1171	381.477	239	597	446710	68.5988	3.52439	1	px	Intensity	1.43482
Merged	36958.2	4452.8	4061.8	-3210.8	132	969	112.827	91	161	109329	6.89075	3.41818	969	112.827	91	161	109329	6.89075	3.52439	268.45	210	354	260128	22.8865	3.41818	969	268.45	210	354	260128	22.8865	3.52439	315.592	159	574	305809	92.7191	3.41818	969	315.592	159	574	305809	92.7191	3.52439	1	px	Intensity	1.42697
Merged	36958.2	4452.8	4061.8	-3210.8	71	656	115.956	85	165	76067	9.06288	3.41818	656	115.956	85	165	76067	9.06288	3.52439	365.756	204	580	239936	79.6479	3.41818	656	365.756	204	580	239936	79.6479	3.52439	331.145	209	532	217231	75.3503	3.41818	656	331.145	209	532	217231	75.3503	3.52439	1	px	Intensity	1.42296
Merged	36958.2	4452.8	4061.8	-3210.8	1	53354	108.285	60	154	5777438	4.86871	3.41818	0	N/A	N/A	N/A	N/A	N/A	N/A	211.437	143	276	11280988	14.6604	3.41818	0	N/A	N/A	N/A	N/A	N/A	N/A	565.496	399	726	30171465	33.6136	3.41818	0	N/A	N/A	N/A	N/A	N/A	N/A	0	px	Intensity	1.42217
Merged	36958.2	4452.8	4061.8	-3210.8	180	542	111.956	92	159	60680	8.00751	3.41818	542	111.956	92	159	60680	8.00751	3.52439	247.221	189	308	133994	19.6074	3.41818	542	247.221	189	308	133994	19.6074	3.52439	319.33	190	526	173077	83.1457	3.41818	542	319.33	190	526	173077	83.1457	3.52439	1	px	Intensity	1.4202
Merged	36958.2	4452.8	4061.8	-3210.8	302	598	108.308	82	153	64768	5.20742	3.41818	598	108.308	82	153	64768	5.20742	3.52439	210.903	166	255	126120	15.0007	3.41818	598	210.903	166	255	126120	15.0007	3.52439	327.062	162	577	195583	100.971	3.41818	598	327.062	162	577	195583	100.971	3.52439	1	px	Intensity	1.41264
Merged	36958.2	4452.8	4061.8	-3210.8	334	810	113.483	98	160	91921	8.57779	3.41818	810	113.483	98	160	91921	8.57779	3.52439	232.964	183	288	188701	18.2967	3.41818	810	232.964	183	288	188701	18.2967	3.52439	344.922	182	563	279387	83.9942	3.41818	810	344.922	182	563	279387	83.9942	3.52439	1	px	Intensity	1.40991
Merged	36958.2	4452.8	4061.8	-3210.8	33	237	127.038	102	178	30108	14.81	3.41818	237	127.038	102	178	30108	14.81	3.52439	320.772	259	366	76023	20.97	3.41818	237	320.772	259	366	76023	20.97	3.52439	351.405	213	557	83283	74.1913	3.41818	237	351.405	213	557	83283	74.1913	3.52439	1	px	Intensity	1.40116
Merged	36958.2	4452.8	4061.8	-3210.8	96	603	112.857	95	158	68053	8.51655	3.41818	603	112.857	95	158	68053	8.51655	3.52439	249.322	194	306	150341	20.5859	3.41818	603	249.322	194	306	150341	20.5859	3.52439	333.615	214	519	201170	72.1081	3.41818	603	333.615	214	519	201170	72.1081	3.52439	1	px	Intensity	1.4
Merged	36958.2	4452.8	4061.8	-3210.8	145	388	110.425	85	154	42845	6.2195	3.41818	388	110.425	85	154	42845	6.2195	3.52439	227.062	173	280	88100	16.9089	3.41818	388	227.062	173	280	88100	16.9089	3.52439	324.116	195	531	125757	78.0175	3.41818	388	324.116	195	531	125757	78.0175	3.52439	1	px	Intensity	1.39461
Merged	36958.2	4452.8	4061.8	-3210.8	106	1209	109.178	75	152	131996	5.97511	3.41818	1209	109.178	75	152	131996	5.97511	3.52439	237.976	171	314	287713	24.0829	3.41818	1209	237.976	171	314	287713	24.0829	3.52439	333.959	164	541	403756	89.9697	3.41818	1209	333.959	164	541	403756	89.9697	3.52439	1	px	Intensity	1.39222
Merged	36958.2	4452.8	4061.8	-3210.8	42	257	111.381	82	155	28625	7.08514	3.41818	257	111.381	82	155	28625	7.08514	3.52439	226.817	172	274	58292	15.6065	3.41818	257	226.817	172	274	58292	15.6065	3.52439	335.938	169	519	86336	94.2004	3.41818	257	335.938	169	519	86336	94.2004	3.52439	1	px	Intensity	1.39162
Merged	36958.2	4452.8	4061.8	-3210.8	190	319	116.041	100	161	37017	8.03393	3.41818	319	116.041	100	161	37017	8.03393	3.52439	408.853	234	617	130424	97.4983	3.41818	319	408.853	234	617	130424	97.4983	3.52439	312.558	190	543	99706	98.3145	3.41818	319	312.558	190	543	99706	98.3145	3.52439	1	px	Intensity	1.38744
Merged	36958.2	4452.8	4061.8	-3210.8	316	1219	108.894	93	151	132742	5.98774	3.41818	1219	108.894	93	151	132742	5.98774	3.52439	217.194	170	274	264760	16.1126	3.41818	1219	217.194	170	274	264760	16.1126	3.52439	373.829	239	580	455697	67.2339	3.41818	1219	373.829	239	580	455697	67.2339	3.52439	1	px	Intensity	1.38667
Merged	36958.2	4452.8	4061.8	-3210.8	46	625	124.09	99	172	77556	11.3887	3.41818	625	124.09	99	172	77556	11.3887	3.52439	477.328	253	735	298330	98.2743	3.41818	625	477.328	253	735	298330	98.2743	3.52439	315.28	196	524	197050	73.6194	3.41818	625	315.28	196	524	197050	73.6194	3.52439	1	px	Intensity	1.3861
Merged	36958.2	4452.8	4061.8	-3210.8	355	608	110.459	94	153	67159	7.69968	3.41818	608	110.459	94	153	67159	7.69968	3.52439	227.145	172	290	138104	17.1314	3.41818	608	227.145	172	290	138104	17.1314	3.52439	292.49	170	519	177834	87.7463	3.41818	608	292.49	170	519	177834	87.7463	3.52439	1	px	Intensity	1.38513
Merged	36958.2	4452.8	4061.8	-3210.8	262	600	113.683	92	157	68210	7.70111	3.41818	600	113.683	92	157	68210	7.70111	3.52439	262.155	202	323	157293	21.6757	3.41818	600	262.155	202	323	157293	21.6757	3.52439	317.533	179	561	190520	85.0381	3.41818	600	317.533	179	561	190520	85.0381	3.52439	1	px	Intensity	1.38103
Merged	36958.2	4452.8	4061.8	-3210.8	187	511	113.198	93	156	57844	8.83354	3.41818	511	113.198	93	156	57844	8.83354	3.52439	247.068	191	315	126252	20.3677	3.41818	511	247.068	191	315	126252	20.3677	3.52439	311.677	166	569	159267	103.913	3.41818	511	311.677	166	569	159267	103.913	3.52439	1	px	Intensity	1.37812
Merged	36958.2	4452.8	4061.8	-3210.8	104	605	115.441	91	159	69842	9.17616	3.41818	605	115.441	91	159	69842	9.17616	3.52439	237.159	188	295	143481	18.7229	3.41818	605	237.159	188	295	143481	18.7229	3.52439	341.16	171	581	206402	96.9437	3.41818	605	341.16	171	581	206402	96.9437	3.52439	1	px	Intensity	1.37732
Merged	36958.2	4452.8	4061.8	-3210.8	345	505	110.574	91	152	55840	5.74802	3.41818	505	110.574	91	152	55840	5.74802	3.52439	255.255	192	321	128904	23.6194	3.41818	505	255.255	192	321	128904	23.6194	3.52439	322.598	185	532	162912	84.5097	3.41818	505	322.598	185	532	162912	84.5097	3.52439	1	px	Intensity	1.37464
Merged	36958.2	4452.8	4061.8	-3210.8	278	671	109.259	90	150	73313	5.7133	3.41818	671	109.259	90	150	73313	5.7133	3.52439	218.206	173	261	146416	15.1189	3.41818	671	218.206	173	261	146416	15.1189	3.52439	332.474	217	522	223090	75.4002	3.41818	671	332.474	217	522	223090	75.4002	3.52439	1	px	Intensity	1.37288
Merged	36958.2	4452.8	4061.8	-3210.8	21	560	115.841	97	159	64871	8.80153	3.41818	560	115.841	97	159	64871	8.80153	3.52439	316.22	208	433	177083	51.28	3.41818	560	316.22	208	433	177083	51.28	3.52439	307.771	181	555	172352	90.948	3.41818	560	307.771	181	555	172352	90.948	3.52439	1	px	Intensity	1.37257
Merged	36958.2	4452.8	4061.8	-3210.8	123	400	114.385	98	157	45754	8.35026	3.41818	400	114.385	98	157	45754	8.35026	3.52439	230.803	187	277	92321	15.3116	3.41818	400	230.803	187	277	92321	15.3116	3.52439	317.775	190	522	127110	94.084	3.41818	400	317.775	190	522	127110	94.084	3.52439	1	px	Intensity	1.37256
Merged	36958.2	4452.8	4061.8	-3210.8	195	531	109.326	91	150	58052	5.42079	3.41818	531	109.326	91	150	58052	5.42079	3.52439	219.819	173	275	116724	15.3258	3.41818	531	219.819	173	275	116724	15.3258	3.52439	336.134	222	547	178487	69.5142	3.41818	531	336.134	222	547	178487	69.5142	3.52439	1	px	Intensity	1.37205
Merged	36958.2	4452.8	4061.8	-3210.8	368	309	113.964	76	156	35215	9.58269	3.41818	309	113.964	76	156	35215	9.58269	3.52439	286.485	197	380	88524	37.7862	3.41818	309	286.485	197	380	88524	37.7862	3.52439	315.731	170	578	97561	99.9856	3.41818	309	315.731	170	578	97561	99.9856	3.52439	1	px	Intensity	1.36885
Merged	36958.2	4452.8	4061.8	-3210.8	57	1056	111.848	67	153	118112	6.61128	3.41818	1056	111.848	67	153	118112	6.61128	3.52439	243.727	196	308	257376	18.9701	3.41818	1056	243.727	196	308	257376	18.9701	3.52439	317.167	191	525	334928	79.2203	3.41818	1056	317.167	191	525	334928	79.2203	3.52439	1	px	Intensity	1.36792
Merged	36958.2	4452.8	4061.8	-3210.8	304	426	114.864	89	157	48932	8.50287	3.41818	426	114.864	89	157	48932	8.50287	3.52439	298.988	206	393	127369	38.4204	3.41818	426	298.988	206	393	127369	38.4204	3.52439	298.967	179	537	127360	84.6352	3.41818	426	298.967	179	537	127360	84.6352	3.52439	1	px	Intensity	1.36684
Merged	36958.2	4452.8	4061.8	-3210.8	214	468	127.303	88	174	59578	12.5569	3.41818	468	127.303	88	174	59578	12.5569	3.52439	436.318	289	598	204197	67.6454	3.41818	468	436.318	289	598	204197	67.6454	3.52439	306.778	171	519	143572	96.6889	3.41818	468	306.778	171	519	143572	96.6889	3.52439	1	px	Intensity	1.36681
Merged	36958.2	4452.8	4061.8	-3210.8	24	367	111.27	84	152	40836	6.88409	3.41818	367	111.27	84	152	40836	6.88409	3.52439	256.06	197	332	93974	27.0431	3.41818	367	256.06	197	332	93974	27.0431	3.52439	324.553	199	516	119111	81.4757	3.41818	367	324.553	199	516	119111	81.4757	3.52439	1	px	Intensity	1.36605
Merged	36958.2	4452.8	4061.8	-3210.8	332	479	123.729	101	169	59266	10.7191	3.41818	479	123.729	101	169	59266	10.7191	3.52439	366.351	255	504	175482	49.971	3.41818	479	366.351	255	504	175482	49.971	3.52439	358.175	172	575	171566	94.4023	3.41818	479	358.175	172	575	171566	94.4023	3.52439	1	px	Intensity	1.36589
Merged	36958.2	4452.8	4061.8	-3210.8	185	411	113.557	96	155	46672	8.51598	3.41818	411	113.557	96	155	46672	8.51598	3.52439	238.01	183	301	97822	17.8204	3.41818	411	238.01	183	301	97822	17.8204	3.52439	317.277	158	565	130401	103.938	3.41818	411	317.277	158	565	130401	103.938	3.52439	1	px	Intensity	1.36495
Merged	36958.2	4452.8	4061.8	-3210.8	308	204	124.064	87	169	25309	12.0767	3.41818	204	124.064	87	169	25309	12.0767	3.52439	366.593	269	452	74785	34.1895	3.41818	204	366.593	269	452	74785	34.1895	3.52439	380.074	244	530	77535	71.7751	3.41818	204	380.074	244	530	77535	71.7751	3.52439	1	px	Intensity	1.3622
Merged	36958.2	4452.8	4061.8	-3210.8	161	1975	114.211	84	155	225567	7.25117	3.41818	1975	114.211	84	155	225567	7.25117	3.52439	298.878	182	423	590284	42.8613	3.41818	1975	298.878	182	423	590284	42.8613	3.52439	376.025	168	818	742650	101.031	3.41818	1975	376.025	168	818	742650	101.031	3.52439	1	px	Intensity	1.35714
Merged	36958.2	4452.8	4061.8	-3210.8	144	469	109.806	96	149	51499	5.60868	3.41818	469	109.806	96	149	51499	5.60868	3.52439	221.542	178	276	103903	16.3216	3.41818	469	221.542	178	276	103903	16.3216	3.52439	310.977	185	542	145848	92.1164	3.41818	469	310.977	185	542	145848	92.1164	3.52439	1	px	Intensity	1.35694
Merged	36958.2	4452.8	4061.8	-3210.8	74	1019	114.285	84	155	116456	7.49709	3.41818	1019	114.285	84	155	116456	7.49709	3.52439	257.565	199	323	262459	23.2631	3.41818	1019	257.565	199	323	262459	23.2631	3.52439	328.77	186	693	335017	94.6158	3.41818	1019	328.77	186	693	335017	94.6158	3.52439	1	px	Intensity	1.35626
Merged	36958.2	4452.8	4061.8	-3210.8	291	1187	116.816	60	158	138661	8.2013	3.41818	1187	116.816	60	158	138661	8.2013	3.52439	303.628	207	385	360407	29.6791	3.41818	1187	303.628	207	385	360407	29.6791	3.52439	317.89	128	584	377335	94.1968	3.41818	1187	317.89	128	584	377335	94.1968	3.52439	1	px	Intensity	1.35255
Merged	36958.2	4452.8	4061.8	-3210.8	199	986	115.576	93	156	113958	7.35668	3.41818	986	115.576	93	156	113958	7.35668	3.52439	309.625	236	409	305290	27.4149	3.41818	986	309.625	236	409	305290	27.4149	3.52439	355.997	208	596	351013	83.6925	3.41818	986	355.997	208	596	351013	83.6925	3.52439	1	px	Intensity	1.34976
Merged	36958.2	4452.8	4061.8	-3210.8	300	1542	111.89	80	151	172535	6.48765	3.41818	1542	111.89	80	151	172535	6.48765	3.52439	266.753	204	345	411333	24.0097	3.41818	1542	266.753	204	345	411333	24.0097	3.52439	353.404	167	759	544949	107.722	3.41818	1542	353.404	167	759	544949	107.722	3.52439	1	px	Intensity	1.34953
Merged	36958.2	4452.8	4061.8	-3210.8	169	361	113.729	95	153	41056	7.98436	3.41818	361	113.729	95	153	41056	7.98436	3.52439	281.953	213	365	101785	30.769	3.41818	361	281.953	213	365	101785	30.769	3.52439	333.637	224	545	120443	70.3034	3.41818	361	333.637	224	545	120443	70.3034	3.52439	1	px	Intensity	1.34531
Merged	36958.2	4452.8	4061.8	-3210.8	328	752	110.899	81	149	83396	6.63827	3.41818	752	110.899	81	149	83396	6.63827	3.52439	230.564	173	301	173384	19.7948	3.41818	752	230.564	173	301	173384	19.7948	3.52439	367.156	214	568	276101	76.2079	3.41818	752	367.156	214	568	276101	76.2079	3.52439	1	px	Intensity	1.34357
Merged	36958.2	4452.8	4061.8	-3210.8	82	438	111.459	95	149	48819	6.74511	3.41818	438	111.459	95	149	48819	6.74511	3.52439	219.769	175	264	96259	14.0246	3.41818	438	219.769	175	264	96259	14.0246	3.52439	318.155	195	518	139352	82.5522	3.41818	438	318.155	195	518	139352	82.5522	3.52439	1	px	Intensity	1.33682
Merged	36958.2	4452.8	4061.8	-3210.8	301	638	109.379	95	146	69784	6.36156	3.41818	638	109.379	95	146	69784	6.36156	3.52439	217.538	175	276	138789	14.5597	3.41818	638	217.538	175	276	138789	14.5597	3.52439	324.129	196	557	206794	88.5233	3.41818	638	324.129	196	557	206794	88.5233	3.52439	1	px	Intensity	1.3348
Merged	36958.2	4452.8	4061.8	-3210.8	321	569	110.912	98	148	63109	7.18346	3.41818	569	110.912	98	148	63109	7.18346	3.52439	232.838	178	302	132485	21.8425	3.41818	569	232.838	178	302	132485	21.8425	3.52439	333.399	176	542	189704	97.9532	3.41818	569	333.399	176	542	189704	97.9532	3.52439	1	px	Intensity	1.33439
Merged	36958.2	4452.8	4061.8	-3210.8	97	1336	113.982	91	152	152280	7.73038	3.41818	1336	113.982	91	152	152280	7.73038	3.52439	295.577	184	551	394891	79.065	3.41818	1336	295.577	184	551	394891	79.065	3.52439	319.571	182	612	426947	90.1038	3.41818	1336	319.571	182	612	426947	90.1038	3.52439	1	px	Intensity	1.33354
Merged	36958.2	4452.8	4061.8	-3210.8	154	359	113.329	94	151	40685	7.95553	3.41818	359	113.329	94	151	40685	7.95553	3.52439	223.329	182	261	80175	14.7883	3.41818	359	223.329	182	261	80175	14.7883	3.52439	310.125	170	522	111335	99.4897	3.41818	359	310.125	170	522	111335	99.4897	3.52439	1	px	Intensity	1.33241
Merged	36958.2	4452.8	4061.8	-3210.8	336	578	111.83	92	149	64638	6.21872	3.41818	578	111.83	92	149	64638	6.21872	3.52439	241.824	178	308	139774	21.3912	3.41818	578	241.824	178	308	139774	21.3912	3.52439	311.813	192	519	180228	79.6287	3.41818	578	311.813	192	519	180228	79.6287	3.52439	1	px	Intensity	1.33237
Merged	36958.2	4452.8	4061.8	-3210.8	239	404	125.649	88	167	50762	12.2218	3.41818	404	125.649	88	167	50762	12.2218	3.52439	393.042	251	512	158789	52.2963	3.41818	404	393.042	251	512	158789	52.2963	3.52439	305.245	168	517	123319	91.1604	3.41818	404	305.245	168	517	123319	91.1604	3.52439	1	px	Intensity	1.3291
Merged	36958.2	4452.8	4061.8	-3210.8	244	360	113.064	81	150	40703	7.62199	3.41818	360	113.064	81	150	40703	7.62199	3.52439	277.053	190	358	99739	28.0881	3.41818	360	277.053	190	358	99739	28.0881	3.52439	318.539	148	534	114674	109.016	3.41818	360	318.539	148	534	114674	109.016	3.52439	1	px	Intensity	1.32668
Merged	36958.2	4452.8	4061.8	-3210.8	168	478	128.232	101	170	61295	10.7208	3.41818	478	128.232	101	170	61295	10.7208	3.52439	507.736	324	1083	242698	155.087	3.41818	478	507.736	324	1083	242698	155.087	3.52439	334.096	185	539	159698	88.1948	3.41818	478	334.096	185	539	159698	88.1948	3.52439	1	px	Intensity	1.32572
Merged	36958.2	4452.8	4061.8	-3210.8	251	333	119.288	102	158	39723	9.06453	3.41818	333	119.288	102	158	39723	9.06453	3.52439	387.517	233	549	129043	64.8536	3.41818	333	387.517	233	549	129043	64.8536	3.52439	309.943	173	529	103211	104.581	3.41818	333	309.943	173	529	103211	104.581	3.52439	1	px	Intensity	1.32452
Merged	36958.2	4452.8	4061.8	-3210.8	155	513	111.836	88	148	57372	6.50451	3.41818	513	111.836	88	148	57372	6.50451	3.52439	250.025	193	313	128263	20.6465	3.41818	513	250.025	193	313	128263	20.6465	3.52439	308.54	177	553	158281	82.2624	3.41818	513	308.54	177	553	158281	82.2624	3.52439	1	px	Intensity	1.32336
Merged	36958.2	4452.8	4061.8	-3210.8	119	1033	110.431	86	146	114075	5.95062	3.41818	1033	110.431	86	146	114075	5.95062	3.52439	224.098	176	275	231493	15.8452	3.41818	1033	224.098	176	275	231493	15.8452	3.52439	323.651	182	566	334332	94.6179	3.41818	1033	323.651	182	566	334332	94.6179	3.52439	1	px	Intensity	1.3221
Merged	36958.2	4452.8	4061.8	-3210.8	30	330	114.361	88	151	37739	9.04346	3.41818	330	114.361	88	151	37739	9.04346	3.52439	225.664	175	279	74469	17.584	3.41818	330	225.664	175	279	74469	17.584	3.52439	311.703	172	554	102862	102.637	3.41818	330	311.703	172	554	102862	102.637	3.52439	1	px	Intensity	1.32038
Merged	36958.2	4452.8	4061.8	-3210.8	15	861	114.526	86	151	98607	8.15661	3.41818	861	114.526	86	151	98607	8.15661	3.52439	307.741	225	395	264965	31.0598	3.41818	861	307.741	225	395	264965	31.0598	3.52439	334.52	181	556	288022	85.0021	3.41818	861	334.52	181	556	288022	85.0021	3.52439	1	px	Intensity	1.31848
Merged	36958.2	4452.8	4061.8	-3210.8	43	845	117.617	90	155	99386	8.341	3.41818	845	117.617	90	155	99386	8.341	3.52439	358.196	226	525	302676	63.8506	3.41818	845	358.196	226	525	302676	63.8506	3.52439	321.942	164	530	272041	85.1972	3.41818	845	321.942	164	530	272041	85.1972	3.52439	1	px	Intensity	1.31784
Merged	36958.2	4452.8	4061.8	-3210.8	213	1319	110.033	84	145	145134	5.81277	3.41818	1319	110.033	84	145	145134	5.81277	3.52439	256.187	180	344	337911	26.9516	3.41818	1319	256.187	180	344	337911	26.9516	3.52439	324.728	170	551	428316	90.876	3.41818	1319	324.728	170	551	428316	90.876	3.52439	1	px	Intensity	1.31778
Merged	36958.2	4452.8	4061.8	-3210.8	93	373	119.971	98	158	44749	9.6955	3.41818	373	119.971	98	158	44749	9.6955	3.52439	410.877	239	599	153257	98.1842	3.41818	373	410.877	239	599	153257	98.1842	3.52439	311.882	184	519	116332	90.1323	3.41818	373	311.882	184	519	116332	90.1323	3.52439	1	px	Intensity	1.31699
Merged	36958.2	4452.8	4061.8	-3210.8	113	833	117.723	78	155	98063	8.46784	3.41818	833	117.723	78	155	98063	8.46784	3.52439	321.136	222	412	267506	30.4495	3.41818	833	321.136	222	412	267506	30.4495	3.52439	349.151	185	533	290843	90.9612	3.41818	833	349.151	185	533	290843	90.9612	3.52439	1	px	Intensity	1.31665
Merged	36958.2	4452.8	4061.8	-3210.8	16	1487	112.46	79	148	167228	7.73014	3.41818	1487	112.46	79	148	167228	7.73014	3.52439	245.513	168	323	365078	24.9698	3.41818	1487	245.513	168	323	365078	24.9698	3.52439	352.726	172	597	524504	87.0964	3.41818	1487	352.726	172	597	524504	87.0964	3.52439	1	px	Intensity	1.31602
Merged	36958.2	4452.8	4061.8	-3210.8	253	522	117.071	89	154	61111	8.85076	3.41818	522	117.071	89	154	61111	8.85076	3.52439	242.113	193	291	126383	17.5335	3.41818	522	242.113	193	291	126383	17.5335	3.52439	309.188	167	532	161396	98.4898	3.41818	522	309.188	167	532	161396	98.4898	3.52439	1	px	Intensity	1.31544
Merged	36958.2	4452.8	4061.8	-3210.8	50	392	111.872	93	147	43854	6.90028	3.41818	392	111.872	93	147	43854	6.90028	3.52439	228.89	182	278	89725	16.9946	3.41818	392	228.89	182	278	89725	16.9946	3.52439	333.401	175	519	130693	98.001	3.41818	392	333.401	175	519	130693	98.001	3.52439	1	px	Intensity	1.314
Merged	36958.2	4452.8	4061.8	-3210.8	204	660	139.373	99	183	91986	13.4049	3.41818	660	139.373	99	183	91986	13.4049	3.52439	660.42	346	1038	435877	152.447	3.41818	660	660.42	346	1038	435877	152.447	3.52439	313.545	186	578	206940	81.1846	3.41818	660	313.545	186	578	206940	81.1846	3.52439	1	px	Intensity	1.31303
Merged	36958.2	4452.8	4061.8	-3210.8	23	791	108.949	93	143	86179	5.28576	3.41818	791	108.949	93	143	86179	5.28576	3.52439	234.307	179	293	185337	18.62	3.41818	791	234.307	179	293	185337	18.62	3.52439	326.077	178	594	257927	95.735	3.41818	791	326.077	178	594	257927	95.735	3.52439	1	px	Intensity	1.31254
Merged	36958.2	4452.8	4061.8	-3210.8	285	1083	112.023	92	147	121321	7.04435	3.41818	1083	112.023	92	147	121321	7.04435	3.52439	264.673	189	376	286641	39.5594	3.41818	1083	264.673	189	376	286641	39.5594	3.52439	312.769	197	539	338729	75.3299	3.41818	1083	312.769	197	539	338729	75.3299	3.52439	1	px	Intensity	1.31223
Merged	36958.2	4452.8	4061.8	-3210.8	164	453	109.808	93	144	49743	5.64099	3.41818	453	109.808	93	144	49743	5.64099	3.52439	238.355	175	291	107975	18.6734	3.41818	453	238.355	175	291	107975	18.6734	3.52439	319.04	158	563	144525	104.179	3.41818	453	319.04	158	563	144525	104.179	3.52439	1	px	Intensity	1.31138
Merged	36958.2	4452.8	4061.8	-3210.8	100	506	110.964	98	145	56148	5.89076	3.41818	506	110.964	98	145	56148	5.89076	3.52439	244.186	175	304	123558	18.6568	3.41818	506	244.186	175	304	123558	18.6568	3.52439	311.889	154	524	157816	98.6812	3.41818	506	311.889	154	524	157816	98.6812	3.52439	1	px	Intensity	1.30673
Merged	36958.2	4452.8	4061.8	-3210.8	344	932	111.806	94	146	104203	6.91447	3.41818	932	111.806	94	146	104203	6.91447	3.52439	228.549	184	294	213008	17.1953	3.41818	932	228.549	184	294	213008	17.1953	3.52439	320.601	163	543	298800	91.1178	3.41818	932	320.601	163	543	298800	91.1178	3.52439	1	px	Intensity	1.30584
Merged	36958.2	4452.8	4061.8	-3210.8	73	536	112.59	76	147	60348	7.05161	3.41818	536	112.59	76	147	60348	7.05161	3.52439	248.776	193	319	133344	20.3553	3.41818	536	248.776	193	319	133344	20.3553	3.52439	313.47	162	519	168020	92.4969	3.41818	536	313.47	162	519	168020	92.4969	3.52439	1	px	Intensity	1.30563
Merged	36958.2	4452.8	4061.8	-3210.8	81	965	117.249	100	153	113145	7.68891	3.41818	965	117.249	100	153	113145	7.68891	3.52439	246.17	186	349	237554	24.7652	3.41818	965	246.17	186	349	237554	24.7652	3.52439	325.216	181	554	313833	87.3215	3.41818	965	325.216	181	554	313833	87.3215	3.52439	1	px	Intensity	1.30492
Merged	36958.2	4452.8	4061.8	-3210.8	326	469	112.691	97	147	52852	6.92033	3.41818	469	112.691	97	147	52852	6.92033	3.52439	314.307	201	430	147410	53.0498	3.41818	469	314.307	201	430	147410	53.0498	3.52439	346.655	230	547	162581	69.3505	3.41818	469	346.655	230	547	162581	69.3505	3.52439	1	px	Intensity	1.30445
Merged	36958.2	4452.8	4061.8	-3210.8	78	593	112.137	95	146	66497	6.46887	3.41818	593	112.137	95	146	66497	6.46887	3.52439	243.841	194	294	144598	19.0754	3.41818	593	243.841	194	294	144598	19.0754	3.52439	306.298	157	534	181635	87.196	3.41818	593	306.298	157	534	181635	87.196	3.52439	1	px	Intensity	1.30198
Merged	36958.2	4452.8	4061.8	-3210.8	12	609	108.297	90	141	65953	5.75986	3.41818	609	108.297	90	141	65953	5.75986	3.52439	210.353	150	255	128105	15.5115	3.41818	609	210.353	150	255	128105	15.5115	3.52439	312.588	172	536	190366	98.8211	3.41818	609	312.588	172	536	190366	98.8211	3.52439	1	px	Intensity	1.30197
Merged	36958.2	4452.8	4061.8	-3210.8	367	692	120.634	77	157	83479	9.42792	3.41818	692	120.634	77	157	83479	9.42792	3.52439	393.922	260	568	272594	59.4812	3.41818	692	393.922	260	568	272594	59.4812	3.52439	325.058	188	558	224940	85.486	3.41818	692	325.058	188	558	224940	85.486	3.52439	1	px	Intensity	1.30145
Merged	36958.2	4452.8	4061.8	-3210.8	298	326	112.963	93	147	36826	8.44676	3.41818	326	112.963	93	147	36826	8.44676	3.52439	205.454	169	246	66978	15.0188	3.41818	326	205.454	169	246	66978	15.0188	3.52439	332.417	167	531	108368	101.757	3.41818	326	332.417	167	531	108368	101.757	3.52439	1	px	Intensity	1.30131
Merged	36958.2	4452.8	4061.8	-3210.8	36	708	116.294	74	151	82336	8.92448	3.41818	708	116.294	74	151	82336	8.92448	3.52439	364.451	217	663	258031	110.538	3.41818	708	364.451	217	663	258031	110.538	3.52439	308.448	185	580	218381	80.2821	3.41818	708	308.448	185	580	218381	80.2821	3.52439	1	px	Intensity	1.29844
Merged	36958.2	4452.8	4061.8	-3210.8	210	405	118.64	88	154	48049	9.32632	3.41818	405	118.64	88	154	48049	9.32632	3.52439	401.928	218	587	162781	88.5647	3.41818	405	401.928	218	587	162781	88.5647	3.52439	330.281	215	586	133764	81.9487	3.41818	405	330.281	215	586	133764	81.9487	3.52439	1	px	Intensity	1.29805
Merged	36958.2	4452.8	4061.8	-3210.8	288	285	115.632	98	150	32955	7.51688	3.41818	285	115.632	98	150	32955	7.51688	3.52439	312.856	232	391	89164	32.2507	3.41818	285	312.856	232	391	89164	32.2507	3.52439	345.604	194	535	98497	90.2844	3.41818	285	345.604	194	535	98497	90.2844	3.52439	1	px	Intensity	1.29722
Merged	36958.2	4452.8	4061.8	-3210.8	330	447	110.291	89	143	49300	6.63443	3.41818	447	110.291	89	143	49300	6.63443	3.52439	242.333	186	323	108323	24.7779	3.41818	447	242.333	186	323	108323	24.7779	3.52439	363.582	193	549	162521	88.6569	3.41818	447	363.582	193	549	162521	88.6569	3.52439	1	px	Intensity	1.29657
Merged	36958.2	4452.8	4061.8	-3210.8	95	425	114.287	95	148	48572	7.62815	3.41818	425	114.287	95	148	48572	7.62815	3.52439	314.162	217	425	133519	40.4932	3.41818	425	314.162	217	425	133519	40.4932	3.52439	324.085	164	553	137736	104.774	3.41818	425	324.085	164	553	137736	104.774	3.52439	1	px	Intensity	1.29498
Merged	36958.2	4452.8	4061.8	-3210.8	238	1363	112.013	86	145	152674	6.94276	3.41818	1363	112.013	86	145	152674	6.94276	3.52439	286.281	198	438	390201	43.6828	3.41818	1363	286.281	198	438	390201	43.6828	3.52439	350.525	170	712	477765	97.9225	3.41818	1363	350.525	170	712	477765	97.9225	3.52439	1	px	Intensity	1.29449
Merged	36958.2	4452.8	4061.8	-3210.8	261	339	115.212	83	149	39057	7.59184	3.41818	339	115.212	83	149	39057	7.59184	3.52439	347.209	222	469	117704	50.8375	3.41818	339	347.209	222	469	117704	50.8375	3.52439	315.451	186	572	106938	91.5468	3.41818	339	315.451	186	572	106938	91.5468	3.52439	1	px	Intensity	1.29326
Merged	36958.2	4452.8	4061.8	-3210.8	256	555	114.468	95	148	63530	7.16351	3.41818	555	114.468	95	148	63530	7.16351	3.52439	300.868	197	391	166982	37.1357	3.41818	555	300.868	197	391	166982	37.1357	3.52439	311.551	207	570	172911	74.1994	3.41818	555	311.551	207	570	172911	74.1994	3.52439	1	px	Intensity	1.29293
Merged	36958.2	4452.8	4061.8	-3210.8	294	1343	116.844	95	151	156922	8.10903	3.41818	1343	116.844	95	151	156922	8.10903	3.52439	350.486	210	549	470703	74.5462	3.41818	1343	350.486	210	549	470703	74.5462	3.52439	341.634	180	601	458815	87.9151	3.41818	1343	341.634	180	601	458815	87.9151	3.52439	1	px	Intensity	1.29232
Merged	36958.2	4452.8	4061.8	-3210.8	99	510	109.137	95	141	55660	5.73361	3.41818	510	109.137	95	141	55660	5.73361	3.52439	226.924	176	285	115731	18.0262	3.41818	510	226.924	176	285	115731	18.0262	3.52439	327.163	210	523	166853	76.3367	3.41818	510	327.163	210	523	166853	76.3367	3.52439	1	px	Intensity	1.29195
Merged	36958.2	4452.8	4061.8	-3210.8	94	1067	110.806	81	143	118230	6.05982	3.41818	1067	110.806	81	143	118230	6.05982	3.52439	242.642	170	305	258899	19.4819	3.41818	1067	242.642	170	305	258899	19.4819	3.52439	329.864	201	576	351965	82.3925	3.41818	1067	329.864	201	576	351965	82.3925	3.52439	1	px	Intensity	1.29054
Merged	36958.2	4452.8	4061.8	-3210.8	111	409	112.357	93	145	45954	6.60195	3.41818	409	112.357	93	145	45954	6.60195	3.52439	264.978	186	334	108376	26.7234	3.41818	409	264.978	186	334	108376	26.7234	3.52439	332.347	221	518	135930	76.1286	3.41818	409	332.347	221	518	135930	76.1286	3.52439	1	px	Intensity	1.29053
Merged	36958.2	4452.8	4061.8	-3210.8	101	415	109.335	98	141	45374	5.40285	3.41818	415	109.335	98	141	45374	5.40285	3.52439	227.188	183	289	94283	15.8003	3.41818	415	227.188	183	289	94283	15.8003	3.52439	307.441	159	519	127588	98.2903	3.41818	415	307.441	159	519	127588	98.2903	3.52439	1	px	Intensity	1.28962
Merged	36958.2	4452.8	4061.8	-3210.8	28	730	110.116	92	142	80385	5.92581	3.41818	730	110.116	92	142	80385	5.92581	3.52439	233.104	178	297	170166	17.9314	3.41818	730	233.104	178	297	170166	17.9314	3.52439	315.707	160	521	230466	99.5947	3.41818	730	315.707	160	521	230466	99.5947	3.52439	1	px	Intensity	1.28954
Merged	36958.2	4452.8	4061.8	-3210.8	76	550	112.647	84	145	61956	7.01897	3.41818	550	112.647	84	145	61956	7.01897	3.52439	218.276	174	263	120052	15.73	3.41818	550	218.276	174	263	120052	15.73	3.52439	316.271	171	527	173949	97.774	3.41818	550	316.271	171	527	173949	97.774	3.52439	1	px	Intensity	1.2872
Merged	36958.2	4452.8	4061.8	-3210.8	22	2198	108.057	89	139	237509	5.66232	3.41818	2198	108.057	89	139	237509	5.66232	3.52439	221.791	160	299	487497	25.9954	3.41818	2198	221.791	160	299	487497	25.9954	3.52439	362.729	192	584	797278	83.9703	3.41818	2198	362.729	192	584	797278	83.9703	3.52439	1	px	Intensity	1.28636
Merged	36958.2	4452.8	4061.8	-3210.8	347	668	108.208	90	139	72283	4.89622	3.41818	668	108.208	90	139	72283	4.89622	3.52439	210.166	169	251	140391	14.2981	3.41818	668	210.166	169	251	140391	14.2981	3.52439	503.822	430	578	336553	25.6169	3.41818	668	503.822	430	578	336553	25.6169	3.52439	1	px	Intensity	1.28456
Merged	36958.2	4452.8	4061.8	-3210.8	149	478	110.695	98	142	52912	5.97724	3.41818	478	110.695	98	142	52912	5.97724	3.52439	242.967	193	299	116138	19.4868	3.41818	478	242.967	193	299	116138	19.4868	3.52439	310.728	169	534	148528	97.9695	3.41818	478	310.728	169	534	148528	97.9695	3.52439	1	px	Intensity	1.28281
Merged	36958.2	4452.8	4061.8	-3210.8	241	652	111.525	97	143	72714	6.34141	3.41818	652	111.525	97	143	72714	6.34141	3.52439	267.963	203	343	174712	23.2475	3.41818	652	267.963	203	343	174712	23.2475	3.52439	318.913	159	519	207931	99.4039	3.41818	652	318.913	159	519	207931	99.4039	3.52439	1	px	Intensity	1.28223
Merged	36958.2	4452.8	4061.8	-3210.8	246	414	108.556	90	139	44942	5.16624	3.41818	414	108.556	90	139	44942	5.16624	3.52439	221.145	166	271	91554	16.5378	3.41818	414	221.145	166	271	91554	16.5378	3.52439	327.046	215	528	135397	73.2799	3.41818	414	327.046	215	528	135397	73.2799	3.52439	1	px	Intensity	1.28045
Merged	36958.2	4452.8	4061.8	-3210.8	130	572	112.565	84	144	64387	6.66972	3.41818	572	112.565	84	144	64387	6.66972	3.52439	273.584	195	352	156490	29.5068	3.41818	572	273.584	195	352	156490	29.5068	3.52439	318.126	195	544	181968	81.8005	3.41818	572	318.126	195	544	181968	81.8005	3.52439	1	px	Intensity	1.27926
Merged	36958.2	4452.8	4061.8	-3210.8	313	782	112.095	90	143	87658	6.3484	3.41818	782	112.095	90	143	87658	6.3484	3.52439	251.276	185	323	196498	23.9726	3.41818	782	251.276	185	323	196498	23.9726	3.52439	316.345	196	549	247382	73.5409	3.41818	782	316.345	196	549	247382	73.5409	3.52439	1	px	Intensity	1.27571
Merged	36958.2	4452.8	4061.8	-3210.8	263	338	113.018	88	144	38200	6.6281	3.41818	338	113.018	88	144	38200	6.6281	3.52439	270.58	203	337	91456	27.6273	3.41818	338	270.58	203	337	91456	27.6273	3.52439	317.956	200	545	107469	78.3958	3.41818	338	317.956	200	545	107469	78.3958	3.52439	1	px	Intensity	1.27414
Merged	36958.2	4452.8	4061.8	-3210.8	299	546	113.912	97	145	62196	7.25309	3.41818	546	113.912	97	145	62196	7.25309	3.52439	229.097	164	283	125087	16.754	3.41818	546	229.097	164	283	125087	16.754	3.52439	301.271	189	536	164494	90.8055	3.41818	546	301.271	189	536	164494	90.8055	3.52439	1	px	Intensity	1.27291
Merged	36958.2	4452.8	4061.8	-3210.8	68	467	121.051	101	154	56531	9.49509	3.41818	467	121.051	101	154	56531	9.49509	3.52439	374.66	231	510	174966	57.9443	3.41818	467	374.66	231	510	174966	57.9443	3.52439	306.041	163	551	142921	96.6411	3.41818	467	306.041	163	551	142921	96.6411	3.52439	1	px	Intensity	1.27219
Merged	36958.2	4452.8	4061.8	-3210.8	188	560	118.755	92	151	66503	9.11092	3.41818	560	118.755	92	151	66503	9.11092	3.52439	370.768	228	630	207630	101.249	3.41818	560	370.768	228	630	207630	101.249	3.52439	363.064	241	542	203316	64.4652	3.41818	560	363.064	241	542	203316	64.4652	3.52439	1	px	Intensity	1.27152
Merged	36958.2	4452.8	4061.8	-3210.8	17	517	114.874	97	146	59390	8.10517	3.41818	517	114.874	97	146	59390	8.10517	3.52439	298.271	202	403	154206	43.6468	3.41818	517	298.271	202	403	154206	43.6468	3.52439	303.103	173	533	156704	94.1422	3.41818	517	303.103	173	533	156704	94.1422	3.52439	1	px	Intensity	1.27095
Merged	36958.2	4452.8	4061.8	-3210.8	77	515	121.223	90	154	62430	9.76136	3.41818	515	121.223	90	154	62430	9.76136	3.52439	410.115	215	588	211209	88.3286	3.41818	515	410.115	215	588	211209	88.3286	3.52439	321.988	190	527	165824	77.9015	3.41818	515	321.988	190	527	165824	77.9015	3.52439	1	px	Intensity	1.27038
Merged	36958.2	4452.8	4061.8	-3210.8	47	361	119.69	96	152	43208	9.1083	3.41818	361	119.69	96	152	43208	9.1083	3.52439	389.003	247	541	140430	72.2999	3.41818	361	389.003	247	541	140430	72.2999	3.52439	325.175	216	531	117388	76.2312	3.41818	361	325.175	216	531	117388	76.2312	3.52439	1	px	Intensity	1.26995
Merged	36958.2	4452.8	4061.8	-3210.8	157	470	110.279	95	140	51831	5.93551	3.41818	470	110.279	95	140	51831	5.93551	3.52439	232.398	180	285	109227	16.6509	3.41818	470	232.398	180	285	109227	16.6509	3.52439	348.623	203	537	163853	85.2764	3.41818	470	348.623	203	537	163853	85.2764	3.52439	1	px	Intensity	1.26951
Merged	36958.2	4452.8	4061.8	-3210.8	318	535	112.817	69	143	60357	7.48144	3.41818	535	112.817	69	143	60357	7.48144	3.52439	288.28	209	358	154230	27.9965	3.41818	535	288.28	209	358	154230	27.9965	3.52439	323.705	143	550	173182	101.834	3.41818	535	323.705	143	550	173182	101.834	3.52439	1	px	Intensity	1.26754
Merged	36958.2	4452.8	4061.8	-3210.8	20	372	114.621	95	145	42639	8.02909	3.41818	372	114.621	95	145	42639	8.02909	3.52439	318.261	204	474	118393	66.2556	3.41818	372	318.261	204	474	118393	66.2556	3.52439	334.376	210	543	124388	80.4512	3.41818	372	334.376	210	543	124388	80.4512	3.52439	1	px	Intensity	1.26504
Merged	36958.2	4452.8	4061.8	-3210.8	150	396	111.472	90	141	44143	6.13436	3.41818	396	111.472	90	141	44143	6.13436	3.52439	250.404	190	308	99160	22.1529	3.41818	396	250.404	190	308	99160	22.1529	3.52439	323.924	212	519	128274	72.8133	3.41818	396	323.924	212	519	128274	72.8133	3.52439	1	px	Intensity	1.26489
Merged	36958.2	4452.8	4061.8	-3210.8	159	572	109.927	79	139	62878	5.99504	3.41818	572	109.927	79	139	62878	5.99504	3.52439	224.706	166	274	128532	16.0214	3.41818	572	224.706	166	274	128532	16.0214	3.52439	309.764	186	537	177185	90.3939	3.41818	572	309.764	186	537	177185	90.3939	3.52439	1	px	Intensity	1.26448
Merged	36958.2	4452.8	4061.8	-3210.8	174	637	114.678	94	145	73050	7.29651	3.41818	637	114.678	94	145	73050	7.29651	3.52439	317.961	206	417	202541	38.2552	3.41818	637	317.961	206	417	202541	38.2552	3.52439	312.719	198	524	199202	74.5741	3.41818	637	312.719	198	524	199202	74.5741	3.52439	1	px	Intensity	1.26441
Merged	36958.2	4452.8	4061.8	-3210.8	363	891	113.351	80	143	100996	7.58517	3.41818	891	113.351	80	143	100996	7.58517	3.52439	329.391	179	453	293487	49.5642	3.41818	891	329.391	179	453	293487	49.5642	3.52439	316.943	187	564	282396	76.0984	3.41818	891	316.943	187	564	282396	76.0984	3.52439	1	px	Intensity	1.26156
Merged	36958.2	4452.8	4061.8	-3210.8	116	850	115.729	93	146	98370	7.57118	3.41818	850	115.729	93	146	98370	7.57118	3.52439	315.513	227	430	268186	30.9084	3.41818	850	315.513	227	430	268186	30.9084	3.52439	397.911	226	560	338224	75.4586	3.41818	850	397.911	226	560	338224	75.4586	3.52439	1	px	Intensity	1.26156
Merged	36958.2	4452.8	4061.8	-3210.8	166	390	118.108	91	149	46062	9.1134	3.41818	390	118.108	91	149	46062	9.1134	3.52439	334.9	241	417	130611	28.5198	3.41818	390	334.9	241	417	130611	28.5198	3.52439	348.164	229	519	135784	73.2375	3.41818	390	348.164	229	519	135784	73.2375	3.52439	1	px	Intensity	1.26156
Merged	36958.2	4452.8	4061.8	-3210.8	220	816	113.446	69	143	92572	6.62548	3.41818	816	113.446	69	143	92572	6.62548	3.52439	269.745	193	337	220112	22.3938	3.41818	816	269.745	193	337	220112	22.3938	3.52439	300.621	170	540	245307	92.0654	3.41818	816	300.621	170	540	245307	92.0654	3.52439	1	px	Intensity	1.26051
Merged	36958.2	4452.8	4061.8	-3210.8	165	737	119.019	98	150	87717	8.27754	3.41818	737	119.019	98	150	87717	8.27754	3.52439	362.103	229	518	266870	54.9039	3.41818	737	362.103	229	518	266870	54.9039	3.52439	372.418	201	574	274472	81.2009	3.41818	737	372.418	201	574	274472	81.2009	3.52439	1	px	Intensity	1.2603
Merged	36958.2	4452.8	4061.8	-3210.8	250	672	111.186	92	140	74717	6.1754	3.41818	672	111.186	92	140	74717	6.1754	3.52439	272.481	187	345	183107	30.9581	3.41818	672	272.481	187	345	183107	30.9581	3.52439	357	238	550	239904	72.297	3.41818	672	357	238	550	239904	72.297	3.52439	1	px	Intensity	1.25915
Merged	36958.2	4452.8	4061.8	-3210.8	352	446	115.182	90	145	51371	7.81456	3.41818	446	115.182	90	145	51371	7.81456	3.52439	246.547	189	304	109960	19.241	3.41818	446	246.547	189	304	109960	19.241	3.52439	298.137	186	530	132969	83.0754	3.41818	446	298.137	186	530	132969	83.0754	3.52439	1	px	Intensity	1.25888
Merged	36958.2	4452.8	4061.8	-3210.8	264	646	108.881	80	137	70337	5.73268	3.41818	646	108.881	80	137	70337	5.73268	3.52439	210.556	160	261	136019	13.6828	3.41818	646	210.556	160	261	136019	13.6828	3.52439	335.15	177	534	216507	95.6571	3.41818	646	335.15	177	534	216507	95.6571	3.52439	1	px	Intensity	1.25826
Merged	36958.2	4452.8	4061.8	-3210.8	276	531	111.292	86	140	59096	7.26714	3.41818	531	111.292	86	140	59096	7.26714	3.52439	229.983	153	287	122121	17.2743	3.41818	531	229.983	153	287	122121	17.2743	3.52439	327.968	168	543	174151	99.6245	3.41818	531	327.968	168	543	174151	99.6245	3.52439	1	px	Intensity	1.25795
Merged	36958.2	4452.8	4061.8	-3210.8	211	486	113.698	89	143	55257	7.33513	3.41818	486	113.698	89	143	55257	7.33513	3.52439	315.617	206	442	153390	54.0498	3.41818	486	315.617	206	442	153390	54.0498	3.52439	347.047	215	548	168665	79.7999	3.41818	486	347.047	215	548	168665	79.7999	3.52439	1	px	Intensity	1.25772
Merged	36958.2	4452.8	4061.8	-3210.8	39	484	111.349	95	140	53893	5.8023	3.41818	484	111.349	95	140	53893	5.8023	3.52439	247.775	194	320	119923	19.5934	3.41818	484	247.775	194	320	119923	19.5934	3.52439	317.436	184	543	153639	82.6844	3.41818	484	317.436	184	543	153639	82.6844	3.52439	1	px	Intensity	1.25731
Merged	36958.2	4452.8	4061.8	-3210.8	365	679	108.972	83	137	73992	5.54188	3.41818	679	108.972	83	137	73992	5.54188	3.52439	219.368	162	271	148951	16.4925	3.41818	679	219.368	162	271	148951	16.4925	3.52439	304.429	192	519	206707	80.3074	3.41818	679	304.429	192	519	206707	80.3074	3.52439	1	px	Intensity	1.2572
Merged	36958.2	4452.8	4061.8	-3210.8	146	662	110.681	92	139	73271	6.27111	3.41818	662	110.681	92	139	73271	6.27111	3.52439	273.529	193	350	181076	25.6061	3.41818	662	273.529	193	350	181076	25.6061	3.52439	324.325	159	540	214703	99.7021	3.41818	662	324.325	159	540	214703	99.7021	3.52439	1	px	Intensity	1.25586
Merged	36958.2	4452.8	4061.8	-3210.8	267	735	112.309	75	141	82547	6.17082	3.41818	735	112.309	75	141	82547	6.17082	3.52439	268.17	201	356	197105	26.7741	3.41818	735	268.17	201	356	197105	26.7741	3.52439	297.525	181	548	218681	91.5002	3.41818	735	297.525	181	548	218681	91.5002	3.52439	1	px	Intensity	1.25547
Merged	36958.2	4452.8	4061.8	-3210.8	237	350	110.811	95	139	38784	5.78284	3.41818	350	110.811	95	139	38784	5.78284	3.52439	247.323	205	313	86563	19.8683	3.41818	350	247.323	205	313	86563	19.8683	3.52439	327.726	214	533	114704	84.1408	3.41818	350	327.726	214	533	114704	84.1408	3.52439	1	px	Intensity	1.25438
Merged	36958.2	4452.8	4061.8	-3210.8	37	934	111.752	89	140	104376	6.58012	3.41818	934	111.752	89	140	104376	6.58012	3.52439	252.345	198	313	235690	20.9443	3.41818	934	252.345	198	313	235690	20.9443	3.52439	327.056	179	532	305470	74.3777	3.41818	934	327.056	179	532	305470	74.3777	3.52439	1	px	Intensity	1.25278
Merged	36958.2	4452.8	4061.8	-3210.8	260	296	111.051	94	139	32871	6.05427	3.41818	296	111.051	94	139	32871	6.05427	3.52439	281.108	211	381	83208	30.6563	3.41818	296	281.108	211	381	83208	30.6563	3.52439	319.247	206	548	94497	84.8997	3.41818	296	319.247	206	548	94497	84.8997	3.52439	1	px	Intensity	1.25168
Merged	36958.2	4452.8	4061.8	-3210.8	257	469	109.518	95	137	51364	5.63869	3.41818	469	109.518	95	137	51364	5.63869	3.52439	221.043	183	269	103669	14.9571	3.41818	469	221.043	183	269	103669	14.9571	3.52439	315.171	198	518	147815	78.6674	3.41818	469	315.171	198	518	147815	78.6674	3.52439	1	px	Intensity	1.25093
Merged	36958.2	4452.8	4061.8	-3210.8	309	920	116.807	96	146	107462	7.88216	3.41818	920	116.807	96	146	107462	7.88216	3.52439	325.167	217	411	299154	31.209	3.41818	920	325.167	217	411	299154	31.209	3.52439	345.534	169	580	317891	87.0292	3.41818	920	345.534	169	580	317891	87.0292	3.52439	1	px	Intensity	1.24993
Merged	36958.2	4452.8	4061.8	-3210.8	72	529	112.021	83	140	59259	6.61638	3.41818	529	112.021	83	140	59259	6.61638	3.52439	250.817	187	335	132682	21.7842	3.41818	529	250.817	187	335	132682	21.7842	3.52439	322.197	210	544	170442	78.4619	3.41818	529	322.197	210	544	170442	78.4619	3.52439	1	px	Intensity	1.24977
Merged	36958.2	4452.8	4061.8	-3210.8	83	601	111.245	92	139	66858	6.06273	3.41818	601	111.245	92	139	66858	6.06273	3.52439	244.527	193	317	146961	20.1468	3.41818	601	244.527	193	317	146961	20.1468	3.52439	325.639	167	536	195709	97.8958	3.41818	601	325.639	167	536	195709	97.8958	3.52439	1	px	Intensity	1.2495
Merged	36958.2	4452.8	4061.8	-3210.8	108	578	119.315	93	149	68964	8.98024	3.41818	578	119.315	93	149	68964	8.98024	3.52439	348.443	226	517	201400	58.1187	3.41818	578	348.443	226	517	201400	58.1187	3.52439	323.671	198	572	187082	74.0853	3.41818	578	323.671	198	572	187082	74.0853	3.52439	1	px	Intensity	1.2488
Merged	36958.2	4452.8	4061.8	-3210.8	107	640	113.747	71	142	72798	8.1404	3.41818	640	113.747	71	142	72798	8.1404	3.52439	308.08	223	462	197171	44.3354	3.41818	640	308.08	223	462	197171	44.3354	3.52439	348.589	202	555	223097	82.3333	3.41818	640	348.589	202	555	223097	82.3333	3.52439	1	px	Intensity	1.24839
Merged	36958.2	4452.8	4061.8	-3210.8	112	1204	113.16	86	141	136245	6.59473	3.41818	1204	113.16	86	141	136245	6.59473	3.52439	262.478	194	325	316023	22.4758	3.41818	1204	262.478	194	325	316023	22.4758	3.52439	373.343	197	811	449505	108.786	3.41818	1204	373.343	197	811	449505	108.786	3.52439	1	px	Intensity	1.24602
Merged	36958.2	4452.8	4061.8	-3210.8	201	369	116.455	96	145	42972	7.99796	3.41818	369	116.455	96	145	42972	7.99796	3.52439	241.366	199	294	89064	17.3707	3.41818	369	241.366	199	294	89064	17.3707	3.52439	306.369	173	516	113050	93.6484	3.41818	369	306.369	173	516	113050	93.6484	3.52439	1	px	Intensity	1.24511
Merged	36958.2	4452.8	4061.8	-3210.8	86	191	106.827	97	133	20404	4.79144	3.41818	191	106.827	97	133	20404	4.79144	3.52439	197.969	164	245	37812	13.7293	3.41818	191	197.969	164	245	37812	13.7293	3.52439	445.623	305	584	85114	56.0216	3.41818	191	445.623	305	584	85114	56.0216	3.52439	1	px	Intensity	1.245
Merged	36958.2	4452.8	4061.8	-3210.8	56	445	110.969	95	138	49381	6.66408	3.41818	445	110.969	95	138	49381	6.66408	3.52439	218.573	184	258	97265	14.1168	3.41818	445	218.573	184	258	97265	14.1168	3.52439	322.011	158	546	143295	99.869	3.41818	445	322.011	158	546	143295	99.869	3.52439	1	px	Intensity	1.2436
Merged	36958.2	4452.8	4061.8	-3210.8	341	437	112.819	93	140	49302	7.50779	3.41818	437	112.819	93	140	49302	7.50779	3.52439	376.714	205	585	164624	95.9469	3.41818	437	376.714	205	585	164624	95.9469	3.52439	378.957	227	519	165604	69.5614	3.41818	437	378.957	227	519	165604	69.5614	3.52439	1	px	Intensity	1.24092
Merged	36958.2	4452.8	4061.8	-3210.8	315	772	113.749	96	141	87814	7.13988	3.41818	772	113.749	96	141	87814	7.13988	3.52439	252.755	190	320	195127	24.3275	3.41818	772	252.755	190	320	195127	24.3275	3.52439	317.427	164	558	245054	92.2892	3.41818	772	317.427	164	558	245054	92.2892	3.52439	1	px	Intensity	1.23957
Merged	36958.2	4452.8	4061.8	-3210.8	192	706	117.133	99	145	82696	7.56016	3.41818	706	117.133	99	145	82696	7.56016	3.52439	322.654	219	440	227794	42.5379	3.41818	706	322.654	219	440	227794	42.5379	3.52439	320.525	185	534	226291	86.2198	3.41818	706	320.525	185	534	226291	86.2198	3.52439	1	px	Intensity	1.23791
Merged	36958.2	4452.8	4061.8	-3210.8	124	446	117.296	101	145	52314	8.13592	3.41818	446	117.296	101	145	52314	8.13592	3.52439	361.908	209	514	161411	73.5223	3.41818	446	361.908	209	514	161411	73.5223	3.52439	322.448	203	537	143812	82.0956	3.41818	446	322.448	203	537	143812	82.0956	3.52439	1	px	Intensity	1.23619
Merged	36958.2	4452.8	4061.8	-3210.8	235	694	111.634	83	138	77474	6.69561	3.41818	694	111.634	83	138	77474	6.69561	3.52439	272.81	178	431	189330	49.0276	3.41818	694	272.81	178	431	189330	49.0276	3.52439	346.121	218	548	240208	73.2227	3.41818	694	346.121	218	548	240208	73.2227	3.52439	1	px	Intensity	1.23618
Merged	36958.2	4452.8	4061.8	-3210.8	139	541	114.209	97	141	61787	7.13014	3.41818	541	114.209	97	141	61787	7.13014	3.52439	296.732	221	373	160532	29.1698	3.41818	541	296.732	221	373	160532	29.1698	3.52439	320.375	192	539	173323	82.6449	3.41818	541	320.375	192	539	173323	82.6449	3.52439	1	px	Intensity	1.23458
Merged	36958.2	4452.8	4061.8	-3210.8	35	282	120.759	92	149	34054	8.64421	3.41818	282	120.759	92	149	34054	8.64421	3.52439	314.933	259	427	88811	23.8103	3.41818	282	314.933	259	427	88811	23.8103	3.52439	402.032	270	518	113373	60.2415	3.41818	282	402.032	270	518	113373	60.2415	3.52439	1	px	Intensity	1.23386
Merged	36958.2	4452.8	4061.8	-3210.8	163	592	108.652	93	134	64322	5.3949	3.41818	592	108.652	93	134	64322	5.3949	3.52439	221.899	179	273	131364	16.6488	3.41818	592	221.899	179	273	131364	16.6488	3.52439	328.422	171	568	194426	100.578	3.41818	592	328.422	171	568	194426	100.578	3.52439	1	px	Intensity	1.23329
Merged	36958.2	4452.8	4061.8	-3210.8	118	449	110.281	90	136	49516	5.487	3.41818	449	110.281	90	136	49516	5.487	3.52439	227.339	184	277	102075	15.4089	3.41818	449	227.339	184	277	102075	15.4089	3.52439	316.987	197	528	142327	78.4868	3.41818	449	316.987	197	528	142327	78.4868	3.52439	1	px	Intensity	1.23322
Merged	36958.2	4452.8	4061.8	-3210.8	183	368	120.883	88	149	44485	8.875	3.41818	368	120.883	88	149	44485	8.875	3.52439	443.769	252	605	163307	79.9837	3.41818	368	443.769	252	605	163307	79.9837	3.52439	332.049	213	528	122194	79.3626	3.41818	368	332.049	213	528	122194	79.3626	3.52439	1	px	Intensity	1.2326
Merged	36958.2	4452.8	4061.8	-3210.8	290	725	110.339	96	136	79996	5.77298	3.41818	725	110.339	96	136	79996	5.77298	3.52439	234.754	184	290	170197	17.9409	3.41818	725	234.754	184	290	170197	17.9409	3.52439	337.132	226	518	244421	71.7391	3.41818	725	337.132	226	518	244421	71.7391	3.52439	1	px	Intensity	1.23256
Merged	36958.2	4452.8	4061.8	-3210.8	48	679	110.471	94	136	75010	5.72308	3.41818	679	110.471	94	136	75010	5.72308	3.52439	226.56	182	281	153834	15.4718	3.41818	679	226.56	182	281	153834	15.4718	3.52439	347.779	182	571	236142	86.7644	3.41818	679	347.779	182	571	236142	86.7644	3.52439	1	px	Intensity	1.23109
Merged	36958.2	4452.8	4061.8	-3210.8	231	859	112.924	86	139	97002	6.90512	3.41818	859	112.924	86	139	97002	6.90512	3.52439	295.735	205	417	254036	45.6012	3.41818	859	295.735	205	417	254036	45.6012	3.52439	332.21	169	541	285368	87.6973	3.41818	859	332.21	169	541	285368	87.6973	3.52439	1	px	Intensity	1.23091
Merged	36958.2	4452.8	4061.8	-3210.8	200	1496	112.279	87	138	167969	6.3356	3.41818	1496	112.279	87	138	167969	6.3356	3.52439	255.085	183	311	381607	18.8122	3.41818	1496	255.085	183	311	381607	18.8122	3.52439	360.847	199	1070	539827	126.322	3.41818	1496	360.847	199	1070	539827	126.322	3.52439	1	px	Intensity	1.22908
Merged	36958.2	4452.8	4061.8	-3210.8	203	1216	110.698	93	136	134609	5.92185	3.41818	1216	110.698	93	136	134609	5.92185	3.52439	233.466	178	294	283895	18.5019	3.41818	1216	233.466	178	294	283895	18.5019	3.52439	364.4	238	601	443111	68.8742	3.41818	1216	364.4	238	601	443111	68.8742	3.52439	1	px	Intensity	1.22857
Merged	36958.2	4452.8	4061.8	-3210.8	324	455	116.442	95	143	52981	7.63787	3.41818	455	116.442	95	143	52981	7.63787	3.52439	366.057	225	499	166556	56.358	3.41818	455	366.057	225	499	166556	56.358	3.52439	304.785	180	519	138677	101.764	3.41818	455	304.785	180	519	138677	101.764	3.52439	1	px	Intensity	1.22808
Merged	36958.2	4452.8	4061.8	-3210.8	189	247	122.174	98	150	30177	8.66682	3.41818	247	122.174	98	150	30177	8.66682	3.52439	420.162	264	560	103780	71.7925	3.41818	247	420.162	264	560	103780	71.7925	3.52439	386.757	228	535	95529	74.2122	3.41818	247	386.757	228	535	95529	74.2122	3.52439	1	px	Intensity	1.22776
Merged	36958.2	4452.8	4061.8	-3210.8	208	1075	113.419	90	139	121925	6.7824	3.41818	1075	113.419	90	139	121925	6.7824	3.52439	296.399	206	448	318629	46.8271	3.41818	1075	296.399	206	448	318629	46.8271	3.52439	321.456	174	668	345565	91.2564	3.41818	1075	321.456	174	668	345565	91.2564	3.52439	1	px	Intensity	1.22555
Merged	36958.2	4452.8	4061.8	-3210.8	222	598	112.656	91	138	67368	6.29722	3.41818	598	112.656	91	138	67368	6.29722	3.52439	230.44	185	293	137803	16.2927	3.41818	598	230.44	185	293	137803	16.2927	3.52439	310.513	157	563	185687	99.8156	3.41818	598	310.513	157	563	185687	99.8156	3.52439	1	px	Intensity	1.22497
Merged	36958.2	4452.8	4061.8	-3210.8	325	583	119.23	92	146	69511	9.03886	3.41818	583	119.23	92	146	69511	9.03886	3.52439	343.643	229	460	200344	50.7104	3.41818	583	343.643	229	460	200344	50.7104	3.52439	358.194	175	556	208827	90.9083	3.41818	583	358.194	175	556	208827	90.9083	3.52439	1	px	Intensity	1.22453
Merged	36958.2	4452.8	4061.8	-3210.8	364	278	112.881	98	138	31381	6.70847	3.41818	278	112.881	98	138	31381	6.70847	3.52439	324.353	200	450	90170	62.6013	3.41818	278	324.353	200	450	90170	62.6013	3.52439	291.723	150	529	81099	105.713	3.41818	278	291.723	150	529	81099	105.713	3.52439	1	px	Intensity	1.22252
Merged	36958.2	4452.8	4061.8	-3210.8	120	597	119.452	87	146	71313	8.35747	3.41818	597	119.452	87	146	71313	8.35747	3.52439	298.797	210	383	178382	32.89	3.41818	597	298.797	210	383	178382	32.89	3.52439	365.779	205	556	218370	74.2839	3.41818	597	365.779	205	556	218370	74.2839	3.52439	1	px	Intensity	1.22225
Merged	36958.2	4452.8	4061.8	-3210.8	258	433	112.164	89	137	48567	6.44061	3.41818	433	112.164	89	137	48567	6.44061	3.52439	307.986	213	408	133358	40.8382	3.41818	433	307.986	213	408	133358	40.8382	3.52439	305.621	198	520	132334	87.4226	3.41818	433	305.621	198	520	132334	87.4226	3.52439	1	px	Intensity	1.22143
Merged	36958.2	4452.8	4061.8	-3210.8	339	554	108.103	94	132	59889	4.88197	3.41818	554	108.103	94	132	59889	4.88197	3.52439	213.206	165	259	118116	15.1828	3.41818	554	213.206	165	259	118116	15.1828	3.52439	495.686	420	571	274610	27.1137	3.41818	554	495.686	420	571	274610	27.1137	3.52439	1	px	Intensity	1.22106
Merged	36958.2	4452.8	4061.8	-3210.8	131	758	111.468	81	136	84493	6.46329	3.41818	758	111.468	81	136	84493	6.46329	3.52439	238.16	180	299	180525	19.8972	3.41818	758	238.16	180	299	180525	19.8972	3.52439	322.563	189	580	244503	81.1274	3.41818	758	322.563	189	580	244503	81.1274	3.52439	1	px	Intensity	1.22008
Merged	36958.2	4452.8	4061.8	-3210.8	44	2402	108.212	85	132	259925	4.85611	3.41818	2402	108.212	85	132	259925	4.85611	3.52439	210.453	150	262	505509	14.4289	3.41818	2402	210.453	150	262	505509	14.4289	3.52439	505.257	406	588	1213627	26.534	3.41818	2402	505.257	406	588	1213627	26.534	3.52439	1	px	Intensity	1.21983
Merged	36958.2	4452.8	4061.8	-3210.8	217	568	111.5	92	136	63332	6.06258	3.41818	568	111.5	92	136	63332	6.06258	3.52439	250.423	203	302	142240	18.6886	3.41818	568	250.423	203	302	142240	18.6886	3.52439	328.806	184	538	186762	80.5159	3.41818	568	328.806	184	538	186762	80.5159	3.52439	1	px	Intensity	1.21973
Merged	36958.2	4452.8	4061.8	-3210.8	270	610	111.582	93	136	68065	6.52392	3.41818	610	111.582	93	136	68065	6.52392	3.52439	241.566	170	306	147355	19.9034	3.41818	610	241.566	170	306	147355	19.9034	3.52439	321.448	209	554	196083	76.5039	3.41818	610	321.448	209	554	196083	76.5039	3.52439	1	px	Intensity	1.21883
Merged	36958.2	4452.8	4061.8	-3210.8	353	537	113.268	91	138	60825	6.60605	3.41818	537	113.268	91	138	60825	6.60605	3.52439	340.931	213	489	183080	59.857	3.41818	537	340.931	213	489	183080	59.857	3.52439	288.624	170	571	154991	97.928	3.41818	537	288.624	170	571	154991	97.928	3.52439	1	px	Intensity	1.21835
Merged	36958.2	4452.8	4061.8	-3210.8	216	412	112.449	84	137	46329	6.57781	3.41818	412	112.449	84	137	46329	6.57781	3.52439	294.818	208	366	121465	30.5838	3.41818	412	294.818	208	366	121465	30.5838	3.52439	315.4	160	559	129945	89.3195	3.41818	412	315.4	160	559	129945	89.3195	3.52439	1	px	Intensity	1.21833
Merged	36958.2	4452.8	4061.8	-3210.8	227	386	111.642	82	136	43094	6.6354	3.41818	386	111.642	82	136	43094	6.6354	3.52439	267.451	200	332	103236	29.5402	3.41818	386	267.451	200	332	103236	29.5402	3.52439	344.347	215	573	132918	74.0996	3.41818	386	344.347	215	573	132918	74.0996	3.52439	1	px	Intensity	1.21817
Merged	36958.2	4452.8	4061.8	-3210.8	338	382	114.139	81	139	43601	7.53243	3.41818	382	114.139	81	139	43601	7.53243	3.52439	337.039	207	468	128749	60.9296	3.41818	382	337.039	207	468	128749	60.9296	3.52439	313.919	204	519	119917	77.5025	3.41818	382	313.919	204	519	119917	77.5025	3.52439	1	px	Intensity	1.21782
Merged	36958.2	4452.8	4061.8	-3210.8	350	311	108.402	93	132	33713	5.14186	3.41818	311	108.402	93	132	33713	5.14186	3.52439	209.267	174	252	65082	14.12	3.41818	311	209.267	174	252	65082	14.12	3.52439	342.466	188	612	106507	98.4651	3.41818	311	342.466	188	612	106507	98.4651	3.52439	1	px	Intensity	1.21769
Merged	36958.2	4452.8	4061.8	-3210.8	181	104	146.25	124	178	15210	11.041	3.41818	104	146.25	124	178	15210	11.041	3.52439	947.788	643	1185	98570	105.861	3.41818	104	947.788	643	1185	98570	105.861	3.52439	437.067	317	567	45455	49.7398	3.41818	104	437.067	317	567	45455	49.7398	3.52439	1	px	Intensity	1.21709
Merged	36958.2	4452.8	4061.8	-3210.8	64	515	113.526	96	138	58466	6.53158	3.41818	515	113.526	96	138	58466	6.53158	3.52439	291.938	216	374	150348	30.7417	3.41818	515	291.938	216	374	150348	30.7417	3.52439	307.575	178	529	158401	91.3727	3.41818	515	307.575	178	529	158401	91.3727	3.52439	1	px	Intensity	1.21558
Merged	36958.2	4452.8	4061.8	-3210.8	295	374	109.551	83	133	40972	5.53202	3.41818	374	109.551	83	133	40972	5.53202	3.52439	228.971	183	274	85635	16.1838	3.41818	374	228.971	183	274	85635	16.1838	3.52439	321.981	208	519	120421	78.8653	3.41818	374	321.981	208	519	120421	78.8653	3.52439	1	px	Intensity	1.21405
Merged	36958.2	4452.8	4061.8	-3210.8	229	396	114.5	94	139	45342	7.39124	3.41818	396	114.5	94	139	45342	7.39124	3.52439	337.354	220	448	133592	48.7231	3.41818	396	337.354	220	448	133592	48.7231	3.52439	298.768	180	515	118312	85.0028	3.41818	396	298.768	180	515	118312	85.0028	3.52439	1	px	Intensity	1.21397
Merged	36958.2	4452.8	4061.8	-3210.8	129	810	114.501	90	139	92746	7.10994	3.41818	810	114.501	90	139	92746	7.10994	3.52439	318.66	226	443	258115	42.9642	3.41818	810	318.66	226	443	258115	42.9642	3.52439	313.107	179	583	253617	87.4303	3.41818	810	313.107	179	583	253617	87.4303	3.52439	1	px	Intensity	1.21396
Merged	36958.2	4452.8	4061.8	-3210.8	314	468	111.462	97	135	52164	5.93018	3.41818	468	111.462	97	135	52164	5.93018	3.52439	246.338	182	302	115286	20.3455	3.41818	468	246.338	182	302	115286	20.3455	3.52439	299.449	161	538	140142	97.5806	3.41818	468	299.449	161	538	140142	97.5806	3.52439	1	px	Intensity	1.21118
Merged	36958.2	4452.8	4061.8	-3210.8	134	700	109.854	92	133	76898	5.93648	3.41818	700	109.854	92	133	76898	5.93648	3.52439	224.767	169	269	157337	15.5093	3.41818	700	224.767	169	269	157337	15.5093	3.52439	337.79	213	519	236453	70.1837	3.41818	700	337.79	213	519	236453	70.1837	3.52439	1	px	Intensity	1.21069
Merged	36958.2	4452.8	4061.8	-3210.8	19	572	108.311	91	131	61954	5.23042	3.41818	572	108.311	91	131	61954	5.23042	3.52439	200.381	136	244	114618	15.0958	3.41818	572	200.381	136	244	114618	15.0958	3.52439	327.117	163	537	187111	101.77	3.41818	572	327.117	163	537	187111	101.77	3.52439	1	px	Intensity	1.20948
Merged	36958.2	4452.8	4061.8	-3210.8	283	281	110.95	93	134	31177	6.1887	3.41818	281	110.95	93	134	31177	6.1887	3.52439	266.349	201	337	74844	24.0035	3.41818	281	266.349	201	337	74844	24.0035	3.52439	334.036	180	566	93864	94.6626	3.41818	281	334.036	180	566	93864	94.6626	3.52439	1	px	Intensity	1.20775
Merged	36958.2	4452.8	4061.8	-3210.8	248	181	107.801	95	130	19512	4.79062	3.41818	181	107.801	95	130	19512	4.79062	3.52439	217.58	181	258	39382	15.5097	3.41818	181	217.58	181	258	39382	15.5097	3.52439	501.453	423	579	90763	25.0204	3.41818	181	501.453	423	579	90763	25.0204	3.52439	1	px	Intensity	1.20592
Merged	36958.2	4452.8	4061.8	-3210.8	158	675	111.132	94	134	75014	6.03452	3.41818	675	111.132	94	134	75014	6.03452	3.52439	236.206	185	291	159439	18.6099	3.41818	675	236.206	185	291	159439	18.6099	3.52439	339.47	215	539	229142	74.8278	3.41818	675	339.47	215	539	229142	74.8278	3.52439	1	px	Intensity	1.20577
Merged	36958.2	4452.8	4061.8	-3210.8	84	261	114.464	94	138	29875	7.28328	3.41818	261	114.464	94	138	29875	7.28328	3.52439	315.479	218	384	82340	32.7577	3.41818	261	315.479	218	384	82340	32.7577	3.52439	336.333	209	549	87783	75.7898	3.41818	261	336.333	209	549	87783	75.7898	3.52439	1	px	Intensity	1.20562
Merged	36958.2	4452.8	4061.8	-3210.8	186	345	118.687	95	143	40947	8.03607	3.41818	345	118.687	95	143	40947	8.03607	3.52439	360.249	243	571	124286	69.5212	3.41818	345	360.249	243	571	124286	69.5212	3.52439	349.913	227	534	120720	78.8984	3.41818	345	349.913	227	534	120720	78.8984	3.52439	1	px	Intensity	1.20485
Merged	36958.2	4452.8	4061.8	-3210.8	280	549	114.543	90	138	62884	6.99491	3.41818	549	114.543	90	138	62884	6.99491	3.52439	314.361	213	408	172584	38.8538	3.41818	549	314.361	213	408	172584	38.8538	3.52439	326.659	219	532	179336	73.0281	3.41818	549	326.659	219	532	179336	73.0281	3.52439	1	px	Intensity	1.20479
Merged	36958.2	4452.8	4061.8	-3210.8	371	486	109.568	95	132	53250	5.85054	3.41818	486	109.568	95	132	53250	5.85054	3.52439	247.735	171	328	120399	29.5366	3.41818	486	247.735	171	328	120399	29.5366	3.52439	333.066	200	565	161870	88.018	3.41818	486	333.066	200	565	161870	88.018	3.52439	1	px	Intensity	1.20473
Merged	36958.2	4452.8	4061.8	-3210.8	167	334	117.105	91	141	39113	7.49615	3.41818	334	117.105	91	141	39113	7.49615	3.52439	296.027	241	361	98873	20.2561	3.41818	334	296.027	241	361	98873	20.2561	3.52439	394.539	255	531	131776	61.1653	3.41818	334	394.539	255	531	131776	61.1653	3.52439	1	px	Intensity	1.20405
Merged	36958.2	4452.8	4061.8	-3210.8	14	378	108.876	95	131	41155	5.38147	3.41818	378	108.876	95	131	41155	5.38147	3.52439	236.246	185	295	89301	18.259	3.41818	378	236.246	185	295	89301	18.259	3.52439	316.839	180	519	119765	87.0411	3.41818	378	316.839	180	519	119765	87.0411	3.52439	1	px	Intensity	1.20321
Merged	36958.2	4452.8	4061.8	-3210.8	90	510	110.639	95	133	56426	5.60504	3.41818	510	110.639	95	133	56426	5.60504	3.52439	216.559	181	260	110445	14.7385	3.41818	510	216.559	181	260	110445	14.7385	3.52439	317.433	172	553	161891	99.0298	3.41818	510	317.433	172	553	161891	99.0298	3.52439	1	px	Intensity	1.20211
Merged	36958.2	4452.8	4061.8	-3210.8	184	540	112.339	88	135	60663	6.2082	3.41818	540	112.339	88	135	60663	6.2082	3.52439	233	184	289	125820	15.7879	3.41818	540	233	184	289	125820	15.7879	3.52439	313.285	197	518	169174	84.7211	3.41818	540	313.285	197	518	169174	84.7211	3.52439	1	px	Intensity	1.20172
Merged	36958.2	4452.8	4061.8	-3210.8	65	937	112.519	87	135	105430	6.81031	3.41818	937	112.519	87	135	105430	6.81031	3.52439	226.989	180	277	212689	16.8148	3.41818	937	226.989	180	277	212689	16.8148	3.52439	340.813	202	568	319342	81.1088	3.41818	937	340.813	202	568	319342	81.1088	3.52439	1	px	Intensity	1.1998
Merged	36958.2	4452.8	4061.8	-3210.8	126	364	115.022	87	138	41868	6.69587	3.41818	364	115.022	87	138	41868	6.69587	3.52439	324.223	225	410	118017	38.8663	3.41818	364	324.223	225	410	118017	38.8663	3.52439	311.794	160	561	113493	106.633	3.41818	364	311.794	160	561	113493	106.633	3.52439	1	px	Intensity	1.19977
Merged	36958.2	4452.8	4061.8	-3210.8	249	245	107.547	98	129	26349	4.46067	3.41818	245	107.547	98	129	26349	4.46067	3.52439	204.649	166	248	50139	14.0519	3.41818	245	204.649	166	248	50139	14.0519	3.52439	464.302	322	593	113754	46.232	3.41818	245	464.302	322	593	113754	46.232	3.52439	1	px	Intensity	1.19948
Merged	36958.2	4452.8	4061.8	-3210.8	268	675	108.403	88	130	73172	5.17555	3.41818	675	108.403	88	130	73172	5.17555	3.52439	211.572	156	268	142811	15.0192	3.41818	675	211.572	156	268	142811	15.0192	3.52439	301.923	163	530	203798	97.9085	3.41818	675	301.923	163	530	203798	97.9085	3.52439	1	px	Intensity	1.19923
Merged	36958.2	4452.8	4061.8	-3210.8	114	439	110.214	94	132	48384	6.67596	3.41818	439	110.214	94	132	48384	6.67596	3.52439	287.144	204	384	126056	40.334	3.41818	439	287.144	204	384	126056	40.334	3.52439	354.437	242	556	155598	69.887	3.41818	439	354.437	242	556	155598	69.887	3.52439	1	px	Intensity	1.19767
Merged	36958.2	4452.8	4061.8	-3210.8	329	240	116.071	95	139	27857	7.61412	3.41818	240	116.071	95	139	27857	7.61412	3.52439	362.483	201	505	86996	70.5108	3.41818	240	362.483	201	505	86996	70.5108	3.52439	305.879	178	531	73411	86.9259	3.41818	240	305.879	178	531	73411	86.9259	3.52439	1	px	Intensity	1.19754
Merged	36958.2	4452.8	4061.8	-3210.8	234	407	111.902	89	134	45544	6.46647	3.41818	407	111.902	89	134	45544	6.46647	3.52439	281.3	190	366	114489	32.7665	3.41818	407	281.3	190	366	114489	32.7665	3.52439	319.914	197	531	130205	80.2247	3.41818	407	319.914	197	531	130205	80.2247	3.52439	1	px	Intensity	1.19748
Merged	36958.2	4452.8	4061.8	-3210.8	67	376	113.609	98	136	42717	6.95126	3.41818	376	113.609	98	136	42717	6.95126	3.52439	322.178	193	455	121139	54.3955	3.41818	376	322.178	193	455	121139	54.3955	3.52439	329.872	198	533	124032	82.1335	3.41818	376	329.872	198	533	124032	82.1335	3.52439	1	px	Intensity	1.19709
Merged	36958.2	4452.8	4061.8	-3210.8	13	372	110.285	81	132	41026	6.23442	3.41818	372	110.285	81	132	41026	6.23442	3.52439	257.535	188	320	95803	26.8948	3.41818	372	257.535	188	320	95803	26.8948	3.52439	323.194	197	531	120228	88.0536	3.41818	372	323.194	197	531	120228	88.0536	3.52439	1	px	Intensity	1.1969
Merged	36958.2	4452.8	4061.8	-3210.8	287	569	109.536	87	131	62326	5.44143	3.41818	569	109.536	87	131	62326	5.44143	3.52439	236.773	183	291	134724	17.4706	3.41818	569	236.773	183	291	134724	17.4706	3.52439	321.39	173	539	182871	96.1877	3.41818	569	321.39	173	539	182871	96.1877	3.52439	1	px	Intensity	1.19595
Merged	36958.2	4452.8	4061.8	-3210.8	252	126	107.865	98	129	13591	4.91935	3.41818	126	107.865	98	129	13591	4.91935	3.52439	206.865	174	237	26065	12.6706	3.41818	126	206.865	174	237	26065	12.6706	3.52439	504.714	440	590	63594	25.0019	3.41818	126	504.714	440	590	63594	25.0019	3.52439	1	px	Intensity	1.19594
Merged	36958.2	4452.8	4061.8	-3210.8	175	504	109.859	93	131	55369	6.24038	3.41818	504	109.859	93	131	55369	6.24038	3.52439	209.466	170	264	105571	15.0349	3.41818	504	209.466	170	264	105571	15.0349	3.52439	347.512	182	570	175146	95.4429	3.41818	504	347.512	182	570	175146	95.4429	3.52439	1	px	Intensity	1.19244
Merged	36958.2	4452.8	4061.8	-3210.8	136	395	109.324	96	130	43183	5.69353	3.41818	395	109.324	96	130	43183	5.69353	3.52439	236.952	176	290	93596	19.8759	3.41818	395	236.952	176	290	93596	19.8759	3.52439	330.959	205	518	130729	79.4287	3.41818	395	330.959	205	518	130729	79.4287	3.52439	1	px	Intensity	1.18913
Merged	36958.2	4452.8	4061.8	-3210.8	89	335	119.454	100	142	40017	8.07339	3.41818	335	119.454	100	142	40017	8.07339	3.52439	396.119	244	526	132700	59.8801	3.41818	335	396.119	244	526	132700	59.8801	3.52439	346.752	247	540	116162	68.2787	3.41818	335	346.752	247	540	116162	68.2787	3.52439	1	px	Intensity	1.18874
Merged	36958.2	4452.8	4061.8	-3210.8	196	616	111.055	82	132	68410	6.07688	3.41818	616	111.055	82	132	68410	6.07688	3.52439	251.333	196	320	154821	20.5081	3.41818	616	251.333	196	320	154821	20.5081	3.52439	309.369	192	533	190571	82.25	3.41818	616	309.369	192	533	190571	82.25	3.52439	1	px	Intensity	1.1886
Merged	36958.2	4452.8	4061.8	-3210.8	207	740	111.07	94	132	82192	6.20042	3.41818	740	111.07	94	132	82192	6.20042	3.52439	244.27	188	328	180760	24.1095	3.41818	740	244.27	188	328	180760	24.1095	3.52439	319.882	161	555	236713	91.9759	3.41818	740	319.882	161	555	236713	91.9759	3.52439	1	px	Intensity	1.18844
Merged	36958.2	4452.8	4061.8	-3210.8	284	325	111.083	94	132	36102	5.91347	3.41818	325	111.083	94	132	36102	5.91347	3.52439	249.655	193	323	81138	26.6251	3.41818	325	249.655	193	323	81138	26.6251	3.52439	339.015	157	544	110180	106.144	3.41818	325	339.015	157	544	110180	106.144	3.52439	1	px	Intensity	1.1883
Merged	36958.2	4452.8	4061.8	-3210.8	172	431	107.752	92	128	46441	4.85104	3.41818	431	107.752	92	128	46441	4.85104	3.52439	213.313	155	254	91938	15.2639	3.41818	431	213.313	155	254	91938	15.2639	3.52439	322.893	167	516	139167	102.595	3.41818	431	322.893	167	516	139167	102.595	3.52439	1	px	Intensity	1.18792
Merged	36958.2	4452.8	4061.8	-3210.8	303	286	112.266	83	133	32108	6.65965	3.41818	286	112.266	83	133	32108	6.65965	3.52439	275.01	212	331	78653	23.6525	3.41818	286	275.01	212	331	78653	23.6525	3.52439	303.853	180	537	86902	94.0958	3.41818	286	303.853	180	537	86902	94.0958	3.52439	1	px	Intensity	1.18469
Merged	36958.2	4452.8	4061.8	-3210.8	85	380	109.787	93	130	41719	5.42811	3.41818	380	109.787	93	130	41719	5.42811	3.52439	220.711	176	268	83870	15.8406	3.41818	380	220.711	176	268	83870	15.8406	3.52439	322.029	195	555	122371	82.7131	3.41818	380	322.029	195	555	122371	82.7131	3.52439	1	px	Intensity	1.18411
Merged	36958.2	4452.8	4061.8	-3210.8	335	499	109.99	95	130	54885	5.69612	3.41818	499	109.99	95	130	54885	5.69612	3.52439	233.84	185	293	116686	17.9991	3.41818	499	233.84	185	293	116686	17.9991	3.52439	292.784	169	518	146099	92.5634	3.41818	499	292.784	169	518	146099	92.5634	3.52439	1	px	Intensity	1.18193
Merged	36958.2	4452.8	4061.8	-3210.8	320	541	107.586	95	127	58204	5.12456	3.41818	541	107.586	95	127	58204	5.12456	3.52439	214.355	168	273	115966	17.1426	3.41818	541	214.355	168	273	115966	17.1426	3.52439	326.268	161	545	176511	108.199	3.41818	541	326.268	161	545	176511	108.199	3.52439	1	px	Intensity	1.18045
Merged	36958.2	4452.8	4061.8	-3210.8	322	274	113.547	95	134	31112	6.78314	3.41818	274	113.547	95	134	31112	6.78314	3.52439	305.522	222	406	83713	39.0644	3.41818	274	305.522	222	406	83713	39.0644	3.52439	314.307	161	542	86120	106.157	3.41818	274	314.307	161	542	86120	106.157	3.52439	1	px	Intensity	1.18012
Merged	36958.2	4452.8	4061.8	-3210.8	148	526	111.055	92	131	58415	6.18662	3.41818	526	111.055	92	131	58415	6.18662	3.52439	220.099	179	277	115772	15.6934	3.41818	526	220.099	179	277	115772	15.6934	3.52439	336.498	193	550	176998	77.7442	3.41818	526	336.498	193	550	176998	77.7442	3.52439	1	px	Intensity	1.17959
Merged	36958.2	4452.8	4061.8	-3210.8	117	531	110.25	94	130	58543	5.55504	3.41818	531	110.25	94	130	58543	5.55504	3.52439	228.725	181	282	121453	18.3315	3.41818	531	228.725	181	282	121453	18.3315	3.52439	331.143	216	530	175837	72.261	3.41818	531	331.143	216	530	175837	72.261	3.52439	1	px	Intensity	1.17913
Merged	36958.2	4452.8	4061.8	-3210.8	297	511	109.427	96	129	55917	5.51149	3.41818	511	109.427	96	129	55917	5.51149	3.52439	237.029	186	295	121122	19.5707	3.41818	511	237.029	186	295	121122	19.5707	3.52439	331.423	197	524	169357	74.3059	3.41818	511	331.423	197	524	169357	74.3059	3.52439	1	px	Intensity	1.17887
Merged	36958.2	4452.8	4061.8	-3210.8	79	369	110.509	84	130	40778	5.78534	3.41818	369	110.509	84	130	40778	5.78534	3.52439	246.285	186	311	90879	22.1808	3.41818	369	246.285	186	311	90879	22.1808	3.52439	324.144	161	550	119609	105.472	3.41818	369	324.144	161	550	119609	105.472	3.52439	1	px	Intensity	1.17637
Merged	36958.2	4452.8	4061.8	-3210.8	122	726	108.12	93	127	78495	5.13756	3.41818	726	108.12	93	127	78495	5.13756	3.52439	219.434	175	283	159309	15.8635	3.41818	726	219.434	175	283	159309	15.8635	3.52439	331.656	168	562	240782	100.924	3.41818	726	331.656	168	562	240782	100.924	3.52439	1	px	Intensity	1.17462
Merged	36958.2	4452.8	4061.8	-3210.8	266	427	109.159	92	128	46611	4.8324	3.41818	427	109.159	92	128	46611	4.8324	3.52439	227.883	182	288	97306	17.2098	3.41818	427	227.883	182	288	97306	17.2098	3.52439	329.506	185	544	140699	84.7721	3.41818	427	329.506	185	544	140699	84.7721	3.52439	1	px	Intensity	1.1726
Merged	36958.2	4452.8	4061.8	-3210.8	31	340	109.474	98	128	37221	5.3373	3.41818	340	109.474	98	128	37221	5.3373	3.52439	228.132	178	281	77565	18.1423	3.41818	340	228.132	178	281	77565	18.1423	3.52439	317.688	164	537	108014	99.4829	3.41818	340	317.688	164	537	108014	99.4829	3.52439	1	px	Intensity	1.16923
Merged	36958.2	4452.8	4061.8	-3210.8	18	366	109.727	82	128	40160	5.83377	3.41818	366	109.727	82	128	40160	5.83377	3.52439	228.049	173	278	83466	18.523	3.41818	366	228.049	173	278	83466	18.523	3.52439	316.661	162	562	115898	98.8032	3.41818	366	316.661	162	562	115898	98.8032	3.52439	1	px	Intensity	1.16653
Merged	36958.2	4452.8	4061.8	-3210.8	152	463	108.022	96	126	50014	4.84991	3.41818	463	108.022	96	126	50014	4.84991	3.52439	208.104	168	260	96352	14.8636	3.41818	463	208.104	168	260	96352	14.8636	3.52439	317.92	160	541	147197	106.135	3.41818	463	317.92	160	541	147197	106.135	3.52439	1	px	Intensity	1.16643
Merged	36958.2	4452.8	4061.8	-3210.8	135	396	109.929	97	128	43532	5.72248	3.41818	396	109.929	97	128	43532	5.72248	3.52439	229.205	187	288	90765	16.2294	3.41818	396	229.205	187	288	90765	16.2294	3.52439	317.083	183	533	125565	89.7144	3.41818	396	317.083	183	533	125565	89.7144	3.52439	1	px	Intensity	1.16438
Merged	36958.2	4452.8	4061.8	-3210.8	115	540	112.528	95	131	60765	6.31237	3.41818	540	112.528	95	131	60765	6.31237	3.52439	272.594	188	350	147201	30.7111	3.41818	540	272.594	188	350	147201	30.7111	3.52439	325.148	191	522	175580	79.9942	3.41818	540	325.148	191	522	175580	79.9942	3.52439	1	px	Intensity	1.16416
Merged	36958.2	4452.8	4061.8	-3210.8	247	384	110.924	95	129	42595	5.80852	3.41818	384	110.924	95	129	42595	5.80852	3.52439	234.195	185	283	89931	18.4152	3.41818	384	234.195	185	283	89931	18.4152	3.52439	306.927	201	518	117860	82.9639	3.41818	384	306.927	201	518	117860	82.9639	3.52439	1	px	Intensity	1.16295
Merged	36958.2	4452.8	4061.8	-3210.8	171	548	111.794	88	130	61263	6.04372	3.41818	548	111.794	88	130	61263	6.04372	3.52439	238.257	186	297	130565	15.7277	3.41818	548	238.257	186	297	130565	15.7277	3.52439	307.805	188	517	168677	87.1105	3.41818	548	307.805	188	517	168677	87.1105	3.52439	1	px	Intensity	1.16286
Merged	36958.2	4452.8	4061.8	-3210.8	55	267	110.161	97	128	29413	5.4085	3.41818	267	110.161	97	128	29413	5.4085	3.52439	247.3	201	290	66029	18.8154	3.41818	267	247.3	201	290	66029	18.8154	3.52439	317.678	177	551	84820	98.9762	3.41818	267	317.678	177	551	84820	98.9762	3.52439	1	px	Intensity	1.16194
Merged	36958.2	4452.8	4061.8	-3210.8	128	652	107.633	94	125	70177	4.87021	3.41818	652	107.633	94	125	70177	4.87021	3.52439	219.454	174	269	143084	16.28	3.41818	652	219.454	174	269	143084	16.28	3.52439	346.939	179	549	226204	92.7464	3.41818	652	346.939	179	549	226204	92.7464	3.52439	1	px	Intensity	1.16135
Merged	36958.2	4452.8	4061.8	-3210.8	178	421	114.751	98	133	48310	6.41019	3.41818	421	114.751	98	133	48310	6.41019	3.52439	306.933	205	393	129219	34.9105	3.41818	421	306.933	205	393	129219	34.9105	3.52439	315.164	202	537	132684	75.616	3.41818	421	315.164	202	537	132684	75.616	3.52439	1	px	Intensity	1.15904
Merged	36958.2	4452.8	4061.8	-3210.8	170	319	107.937	78	125	34432	5.02478	3.41818	319	107.937	78	125	34432	5.02478	3.52439	208.602	173	253	66544	13.3303	3.41818	319	208.602	173	253	66544	13.3303	3.52439	390.781	249	550	124659	71.0934	3.41818	319	390.781	249	550	124659	71.0934	3.52439	1	px	Intensity	1.15808
Merged	36958.2	4452.8	4061.8	-3210.8	156	297	108.077	95	125	32099	4.67527	3.41818	297	108.077	95	125	32099	4.67527	3.52439	227.047	186	274	67433	17.1018	3.41818	297	227.047	186	274	67433	17.1018	3.52439	327.599	167	539	97297	103.785	3.41818	297	327.599	167	539	97297	103.785	3.52439	1	px	Intensity	1.15658
Merged	36958.2	4452.8	4061.8	-3210.8	242	90	108.089	98	125	9728	4.70715	3.41818	90	108.089	98	125	9728	4.70715	3.52439	218.067	177	257	19626	16.0547	3.41818	90	218.067	177	257	19626	16.0547	3.52439	502.978	431	580	45268	26.8456	3.41818	90	502.978	431	580	45268	26.8456	3.52439	1	px	Intensity	1.15646
Merged	36958.2	4452.8	4061.8	-3210.8	51	634	108.256	96	125	68634	4.66238	3.41818	634	108.256	96	125	68634	4.66238	3.52439	208.801	170	250	132380	14.1112	3.41818	634	208.801	170	250	132380	14.1112	3.52439	507.495	411	591	321752	27.3047	3.41818	634	507.495	411	591	321752	27.3047	3.52439	1	px	Intensity	1.15468
Merged	36958.2	4452.8	4061.8	-3210.8	66	223	107.457	95	124	23963	5.05733	3.41818	223	107.457	95	124	23963	5.05733	3.52439	208.126	171	247	46412	13.8395	3.41818	223	208.126	171	247	46412	13.8395	3.52439	487.87	403	555	108795	27.0946	3.41818	223	487.87	403	555	108795	27.0946	3.52439	1	px	Intensity	1.15395
Merged	36958.2	4452.8	4061.8	-3210.8	254	216	107.894	85	124	23305	4.69785	3.41818	216	107.894	85	124	23305	4.69785	3.52439	208.171	149	263	44965	16.0106	3.41818	216	208.171	149	263	44965	16.0106	3.52439	503.648	419	559	108788	24.6212	3.41818	216	503.648	419	559	108788	24.6212	3.52439	1	px	Intensity	1.14928
Merged	36958.2	4452.8	4061.8	-3210.8	357	236	107.267	89	123	25315	4.78428	3.41818	236	107.267	89	123	25315	4.78428	3.52439	200.165	160	247	47239	14.8156	3.41818	236	200.165	160	247	47239	14.8156	3.52439	478.212	384	560	112858	32.2072	3.41818	236	478.212	384	560	112858	32.2072	3.52439	1	px	Intensity	1.14667
Merged	36958.2	4452.8	4061.8	-3210.8	54	287	110.195	82	126	31626	5.61902	3.41818	287	110.195	82	126	31626	5.61902	3.52439	244.895	194	297	70285	19.6177	3.41818	287	244.895	194	297	70285	19.6177	3.52439	313.679	184	526	90026	93.9596	3.41818	287	313.679	184	526	90026	93.9596	3.52439	1	px	Intensity	1.14343
Merged	36958.2	4452.8	4061.8	-3210.8	243	363	108.055	98	123	39224	4.27119	3.41818	363	108.055	98	123	39224	4.27119	3.52439	217.262	173	265	78866	14.2773	3.41818	363	217.262	173	265	78866	14.2773	3.52439	499.039	429	587	181151	26.1831	3.41818	363	499.039	429	587	181151	26.1831	3.52439	1	px	Intensity	1.13831
Merged	36958.2	4452.8	4061.8	-3210.8	360	682	107.198	92	122	73109	4.48394	3.41818	682	107.198	92	122	73109	4.48394	3.52439	209.026	149	259	142556	14.4793	3.41818	682	209.026	149	259	142556	14.4793	3.52439	504.318	438	599	343945	24.7184	3.41818	682	504.318	438	599	343945	24.7184	3.52439	1	px	Intensity	1.13808
Merged	36958.2	4452.8	4061.8	-3210.8	361	254	106.642	92	121	27087	4.77021	3.41818	254	106.642	92	121	27087	4.77021	3.52439	210.437	169	269	53451	14.6401	3.41818	254	210.437	169	269	53451	14.6401	3.52439	475.146	394	566	120687	32.3984	3.41818	254	475.146	394	566	120687	32.3984	3.52439	1	px	Intensity	1.13464
Merged	36958.2	4452.8	4061.8	-3210.8	362	414	106.862	71	121	44241	4.7033	3.41818	414	106.862	71	121	44241	4.7033	3.52439	207.674	170	258	85977	14.9504	3.41818	414	207.674	170	258	85977	14.9504	3.52439	500.184	437	572	207076	25.1882	3.41818	414	500.184	437	572	207076	25.1882	3.52439	1	px	Intensity	1.1323
Merged	36958.2	4452.8	4061.8	-3210.8	359	334	106.973	92	121	35729	4.31458	3.41818	334	106.973	92	121	35729	4.31458	3.52439	208.886	156	256	69768	14.9894	3.41818	334	208.886	156	256	69768	14.9894	3.52439	496.317	428	570	165770	24.8038	3.41818	334	496.317	428	570	165770	24.8038	3.52439	1	px	Intensity	1.13113
Merged	36958.2	4452.8	4061.8	-3210.8	45	252	108.044	96	122	27227	4.75914	3.41818	252	108.044	96	122	27227	4.75914	3.52439	209.071	174	247	52686	12.8288	3.41818	252	209.071	174	247	52686	12.8288	3.52439	504.758	442	594	127199	25.3992	3.41818	252	504.758	442	594	127199	25.3992	3.52439	1	px	Intensity	1.12917
Merged	36958.2	4452.8	4061.8	-3210.8	58	161	109.093	97	123	17564	5.09043	3.41818	161	109.093	97	123	17564	5.09043	3.52439	210.54	177	244	33897	14.5136	3.41818	161	210.54	177	244	33897	14.5136	3.52439	500.739	437	573	80619	25.4224	3.41818	161	500.739	437	573	80619	25.4224	3.52439	1	px	Intensity	1.12748
Merged	36958.2	4452.8	4061.8	-3210.8	61	273	107.685	95	121	29398	4.60259	3.41818	273	107.685	95	121	29398	4.60259	3.52439	212.029	163	261	57884	14.7958	3.41818	273	212.029	163	261	57884	14.7958	3.52439	505.608	433	595	138031	24.9558	3.41818	273	505.608	433	595	138031	24.9558	3.52439	1	px	Intensity	1.12365
Merged	36958.2	4452.8	4061.8	-3210.8	259	277	107.718	91	121	29838	4.34266	3.41818	277	107.718	91	121	29838	4.34266	3.52439	208.386	162	257	57723	14.8897	3.41818	277	208.386	162	257	57723	14.8897	3.52439	503.166	428	599	139377	25.4284	3.41818	277	503.166	428	599	139377	25.4284	3.52439	1	px	Intensity	1.1233
Merged	36958.2	4452.8	4061.8	-3210.8	59	157	108.777	90	121	17078	4.78647	3.41818	157	108.777	90	121	17078	4.78647	3.52439	209.701	165	254	32923	17.1363	3.41818	157	209.701	165	254	32923	17.1363	3.52439	504.159	449	569	79153	21.0479	3.41818	157	504.159	449	569	79153	21.0479	3.52439	1	px	Intensity	1.11237
Merged	36958.2	4452.8	4061.8	-3210.8	40	996	106.242	84	118	105817	4.51997	3.41818	996	106.242	84	118	105817	4.51997	3.52439	194.132	138	239	193355	13.8711	3.41818	996	194.132	138	239	193355	13.8711	3.52439	331.768	175	573	330441	94.8018	3.41818	996	331.768	175	573	330441	94.8018	3.52439	1	px	Intensity	1.11067
Merged	36958.2	4452.8	4061.8	-3210.8	358	240	107.421	96	119	25781	4.42274	3.41818	240	107.421	96	119	25781	4.42274	3.52439	209.088	153	267	50181	15.5033	3.41818	240	209.088	153	267	50181	15.5033	3.52439	484.05	363	562	116172	34.516	3.41818	240	484.05	363	562	116172	34.516	3.52439	1	px	Intensity	1.10779
Merged	36958.2	4452.8	4061.8	-3210.8	103	147	106.796	98	118	15699	4.53751	3.41818	147	106.796	98	118	15699	4.53751	3.52439	200.762	167	240	29512	15.3429	3.41818	147	200.762	167	240	29512	15.3429	3.52439	477.463	353	551	70187	36.3056	3.41818	147	477.463	353	551	70187	36.3056	3.52439	1	px	Intensity	1.10491
Merged	36958.2	4452.8	4061.8	-3210.8	356	485	106.056	96	117	51437	4.29491	3.41818	485	106.056	96	117	51437	4.29491	3.52439	189.689	144	240	91999	14.1578	3.41818	485	189.689	144	240	91999	14.1578	3.52439	346.542	172	544	168073	100.392	3.41818	485	346.542	172	544	168073	100.392	3.52439	1	px	Intensity	1.10319
Merged	36958.2	4452.8	4061.8	-3210.8	49	93	108.591	92	119	10099	5.04437	3.41818	93	108.591	92	119	10099	5.04437	3.52439	208.086	179	246	19352	14.1244	3.41818	93	208.086	179	246	19352	14.1244	3.52439	508.473	433	575	47288	26.1497	3.41818	93	508.473	433	575	47288	26.1497	3.52439	1	px	Intensity	1.09585
[truncated: 1 more columns]

## Sheet: L170D-4
FileName	Time (ms)	Z Pos	X Pos	Y Pos	ROI ID	ROI Area	ROI Mean Intensity(Red)	ROI Min Intensity(Red)	ROI Max Intensity(Red)	ROI Sum Intensity(Red)	ROI StDev Intensity(Red)	ROI Signal/Background(Red)	ROI Mean Intensity(Blue)	ROI Min Intensity(Blue)	ROI Max Intensity(Blue)	ROI Sum Intensity(Blue)	ROI StDev Intensity(Blue)	ROI Signal/Background(Blue)	ROI Mean Intensity(Mono)	ROI Min Intensity(Mono)	ROI Max Intensity(Mono)	ROI Sum Intensity(Mono)	ROI StDev Intensity(Mono)	ROI Signal/Background(Mono)	Area Fraction	Unit	Channel	Red ratio
Merged	113992	4456.48	3395.5	-3194.1	96	1876	132.734	86	675	249009	49.8774	3.44578	418.721	218	1436	785520	236.615	3.44578	370.396	220	988	694863	106.662	3.44578	0	px	Intensity	5.08536
Merged	113992	4456.48	3395.5	-3194.1	435	2290	133.685	91	679	306138	37.1706	3.44578	477.343	230	862	1093116	138.948	3.44578	376.705	182	1239	862654	143.172	3.44578	0	px	Intensity	5.07911
Merged	113992	4456.48	3395.5	-3194.1	247	497	173.398	110	675	86179	52.7277	3.44578	929.129	552	1165	461777	135.658	3.44578	379.509	238	574	188616	70.3996	3.44578	0	px	Intensity	3.89277
Merged	113992	4456.48	3395.5	-3194.1	366	3933	127.174	85	484	500175	24.9287	3.44578	401.809	218	1425	1580316	194.933	3.44578	431.908	207	1101	1698696	151.466	3.44578	0	px	Intensity	3.80581
Merged	113992	4456.48	3395.5	-3194.1	419	970	131.445	97	461	127502	39.5082	3.44578	440.735	180	934	427513	204.388	3.44578	299.409	173	539	290427	89.4779	3.44578	0	px	Intensity	3.50716			Mean
Merged	113992	4456.48	3395.5	-3194.1	168	1191	125.387	69	417	149336	29.4188	3.44578	364.631	192	836	434275	153.357	3.44578	333.302	171	586	396963	96.0568	3.44578	0	px	Intensity	3.3257			With focus		No focus
Merged	113992	4456.48	3395.5	-3194.1	432	777	132.811	91	438	103194	34.9461	3.44578	367.829	194	666	285803	124.113	3.44578	387.375	196	574	300990	78.5243	3.44578	0	px	Intensity	3.29792			351.457		283.973
Merged	113992	4456.48	3395.5	-3194.1	467	1137	132.58	93	420	150743	25.7793	3.44578	426.158	245	887	484542	116.07	3.44578	362.825	191	553	412532	84.3212	3.44578	0	px	Intensity	3.16791
Merged	113992	4456.48	3395.5	-3194.1	288	378	146.003	101	462	55189	50.4835	3.44578	458.632	283	618	173363	79.6535	3.44578	292.344	165	518	110506	90.8584	3.44578	0	px	Intensity	3.16433
Merged	113992	4456.48	3395.5	-3194.1	256	875	134.742	99	426	117899	31.3315	3.44578	481.379	282	934	421207	152.338	3.44578	352.495	199	544	308433	74.1543	3.44578	0	px	Intensity	3.1616
Merged	113992	4456.48	3395.5	-3194.1	253	188	190.356	132	546	35787	63.8224	3.44578	1228.21	753	1592	230903	216.543	3.44578	343.112	231	569	64505	68.5665	3.44578	0	px	Intensity	2.8683
Merged	113992	4456.48	3395.5	-3194.1	413	1082	139.5	99	394	150939	28.0693	3.44578	533.603	305	909	577358	129.78	3.44578	367.914	197	876	398083	106.639	3.44578	0	px	Intensity	2.82437
Merged	113992	4456.48	3395.5	-3194.1	279	798	120.979	92	331	96541	24.6645	3.44578	271.624	191	338	216756	21.8344	3.44578	339.218	190	822	270696	91.7823	3.44578	0	px	Intensity	2.73602
Merged	113992	4456.48	3395.5	-3194.1	167	1060	122.601	94	335	129957	23.3984	3.44578	342.317	185	517	362856	64.1344	3.44578	355.938	226	613	377294	71.5178	3.44578	0	px	Intensity	2.73244
Merged	113992	4456.48	3395.5	-3194.1	40	1741	117.114	94	310	203895	15.6492	3.44578	269.399	173	368	469024	32.7272	3.44578	351.083	206	598	611235	79.7154	3.44578	0	px	Intensity	2.647
Merged	113992	4456.48	3395.5	-3194.1	77	1473	117.757	95	310	173456	18.3193	3.44578	255.28	182	413	376028	43.6837	3.44578	341.234	156	559	502637	87.9182	3.44578	0	px	Intensity	2.63254
Merged	113992	4456.48	3395.5	-3194.1	471	1106	120.838	89	317	133647	20.6926	3.44578	363.698	209	884	402250	156.168	3.44578	327.952	184	960	362715	112.397	3.44578	0	px	Intensity	2.62334
Merged	113992	4456.48	3395.5	-3194.1	171	445	125.103	98	328	55671	26.2389	3.44578	275.706	219	346	122689	23.1504	3.44578	334.71	192	517	148946	83.1613	3.44578	0	px	Intensity	2.62183
Merged	113992	4456.48	3395.5	-3194.1	194	351	144.721	100	373	50797	37.9557	3.44578	574.011	269	977	201478	200.131	3.44578	357.191	235	562	125374	78.5552	3.44578	0	px	Intensity	2.57738
Merged	113992	4456.48	3395.5	-3194.1	400	721	112.605	85	286	81188	16.0887	3.44578	243.742	178	313	175738	25.2168	3.44578	395.401	217	551	285084	65.492	3.44578	0	px	Intensity	2.53986
Merged	113992	4456.48	3395.5	-3194.1	287	787	122.906	93	310	96727	26.4408	3.44578	287.991	205	412	226649	38.1726	3.44578	376.684	218	561	296450	76.0284	3.44578	0	px	Intensity	2.52225
Merged	113992	4456.48	3395.5	-3194.1	205	2286	121.501	80	304	277751	18.5508	3.44578	339.413	203	844	775899	119.769	3.44578	401.149	224	1246	917027	122.132	3.44578	0	px	Intensity	2.50204
Merged	113992	4456.48	3395.5	-3194.1	455	937	124.723	91	312	116865	21.203	3.44578	343.339	211	515	321709	71.0008	3.44578	330.806	168	619	309965	90.6628	3.44578	0	px	Intensity	2.50155
Merged	113992	4456.48	3395.5	-3194.1	51	688	117.59	92	293	80902	20.1275	3.44578	248.054	189	306	170661	20.0985	3.44578	337.372	201	537	232112	77.9851	3.44578	0	px	Intensity	2.49171
Merged	113992	4456.48	3395.5	-3194.1	213	1285	119.417	90	296	153451	17.0354	3.44578	353.654	222	544	454445	65.8517	3.44578	327.605	205	542	420972	73.1474	3.44578	0	px	Intensity	2.47871
Merged	113992	4456.48	3395.5	-3194.1	336	1190	125.555	86	309	149410	21.3447	3.44578	345.425	226	679	411056	65.4263	3.44578	347.171	179	572	413134	82.2239	3.44578	0	px	Intensity	2.46108
Merged	113992	4456.48	3395.5	-3194.1	399	925	119.108	85	292	110175	15.2722	3.44578	329.468	180	549	304758	82.7796	3.44578	369.888	208	549	342146	72.9136	3.44578	0	px	Intensity	2.45155
Merged	113992	4456.48	3395.5	-3194.1	425	2445	126.91	80	310	310294	17.5111	3.44578	411.239	218	727	1005480	94.3521	3.44578	378.839	174	1062	926261	128.276	3.44578	0	px	Intensity	2.44268
Merged	113992	4456.48	3395.5	-3194.1	410	1432	134.08	100	327	192003	22.9073	3.44578	439.538	256	899	629419	124.445	3.44578	392.528	183	1049	562100	158.572	3.44578	0	px	Intensity	2.43884
Merged	113992	4456.48	3395.5	-3194.1	134	662	117.429	77	281	77738	21.6702	3.44578	231.473	178	279	153235	17.0995	3.44578	376.867	267	554	249486	63.5656	3.44578	0	px	Intensity	2.39294
Merged	113992	4456.48	3395.5	-3194.1	105	452	125.575	100	298	56760	23.0351	3.44578	314.027	222	401	141940	36.839	3.44578	378.936	267	544	171279	61.1097	3.44578	0	px	Intensity	2.37308
Merged	113992	4456.48	3395.5	-3194.1	351	563	120.593	99	284	67894	21.0881	3.44578	287.373	211	375	161791	28.6677	3.44578	313.671	186	517	176597	88.7241	3.44578	0	px	Intensity	2.35502
Merged	113992	4456.48	3395.5	-3194.1	176	413	121.322	99	282	50106	24.1092	3.44578	248.148	186	321	102485	27.1634	3.44578	386.203	244	564	159502	72.3114	3.44578	0	px	Intensity	2.32439
Merged	113992	4456.48	3395.5	-3194.1	418	1074	120.927	92	276	129876	15.9261	3.44578	373.086	240	485	400694	48.0845	3.44578	305.856	172	659	328489	88.9897	3.44578	0	px	Intensity	2.28236
Merged	113992	4456.48	3395.5	-3194.1	289	1501	112.919	86	257	169492	11.1219	3.44578	259.611	193	474	389676	26.22	3.44578	351.486	204	607	527580	74.1153	3.44578	0	px	Intensity	2.27596
Merged	113992	4456.48	3395.5	-3194.1	110	2532	120.56	88	274	305258	13.4701	3.44578	351.136	215	654	889076	82.7755	3.44578	406.485	237	1072	1029220	122.361	3.44578	0	px	Intensity	2.27273
Merged	113992	4456.48	3395.5	-3194.1	398	1505	121.598	77	272	183005	13.8988	3.44578	335.193	220	515	504465	58.3371	3.44578	344.007	182	592	517730	88.5455	3.44578	0	px	Intensity	2.23688
Merged	113992	4456.48	3395.5	-3194.1	137	236	152.051	107	338	35884	40.2197	3.44578	495.169	334	606	116860	58.8395	3.44578	368.271	221	525	86912	77.7087	3.44578	0	px	Intensity	2.22294
Merged	113992	4456.48	3395.5	-3194.1	311	1877	118.469	90	258	222367	12.6925	3.44578	349.963	190	650	656880	99.027	3.44578	371.19	229	825	696724	77.6719	3.44578	0	px	Intensity	2.17778
Merged	113992	4456.48	3395.5	-3194.1	124	711	129.208	95	281	91867	22.3643	3.44578	392.802	216	701	279282	130.115	3.44578	324.879	201	562	230989	72.3409	3.44578	0	px	Intensity	2.17479
Merged	113992	4456.48	3395.5	-3194.1	109	951	126.569	93	274	120367	18.8127	3.44578	287.555	213	362	273465	24.2447	3.44578	401.209	198	858	381550	102.247	3.44578	0	px	Intensity	2.16483
Merged	113992	4456.48	3395.5	-3194.1	429	1638	121.2	85	261	198525	16.3383	3.44578	325.63	190	473	533382	44.9584	3.44578	366.511	191	584	600345	78.0007	3.44578	0	px	Intensity	2.15347
Merged	113992	4456.48	3395.5	-3194.1	136	2104	121.419	81	261	255465	15.3609	3.44578	322.384	208	564	678295	76.5272	3.44578	379.192	204	1064	797820	119.21	3.44578	0	px	Intensity	2.14959
Merged	113992	4456.48	3395.5	-3194.1	180	1176	119.254	87	256	140243	14.1218	3.44578	290.116	197	435	341176	48.1538	3.44578	329.767	194	540	387806	70.2566	3.44578	0	px	Intensity	2.14667
Merged	113992	4456.48	3395.5	-3194.1	327	1537	124.91	92	267	191987	16.4509	3.44578	403.899	231	746	620792	99.2296	3.44578	346.868	181	737	533136	92.7306	3.44578	0	px	Intensity	2.13754
Merged	113992	4456.48	3395.5	-3194.1	238	1106	131.745	96	279	145710	21.2865	3.44578	380.731	242	602	421088	78.1005	3.44578	417.613	230	1107	461880	137.115	3.44578	0	px	Intensity	2.11773
Merged	113992	4456.48	3395.5	-3194.1	478	731	115.235	81	244	84237	17.4451	3.44578	249.052	179	320	182057	27.3608	3.44578	360.673	211	585	263652	78.1451	3.44578	0	px	Intensity	2.11741
Merged	113992	4456.48	3395.5	-3194.1	53	1235	128.354	95	268	158517	19.6579	3.44578	552.876	252	1271	682802	240.69	3.44578	330.343	179	813	407974	105.583	3.44578	0	px	Intensity	2.08798
Merged	113992	4456.48	3395.5	-3194.1	430	757	128.51	92	267	97282	24.8773	3.44578	417.266	234	561	315870	67.5373	3.44578	354.975	208	572	268716	73.4274	3.44578	0	px	Intensity	2.07766
Merged	113992	4456.48	3395.5	-3194.1	102	1410	117.546	95	244	165740	14.6929	3.44578	296.216	186	502	417664	60.3556	3.44578	352.746	213	578	497372	65.5311	3.44578	0	px	Intensity	2.07578
Merged	113992	4456.48	3395.5	-3194.1	262	569	114.591	96	234	65202	15.0157	3.44578	240.395	185	311	136785	20.6203	3.44578	375.656	245	550	213748	70.0097	3.44578	0	px	Intensity	2.04205
Merged	113992	4456.48	3395.5	-3194.1	21	398	119.746	99	243	47659	18.1612	3.44578	334.113	219	461	132977	50.5659	3.44578	315.899	199	534	125728	84.4183	3.44578	0	px	Intensity	2.02929
Merged	113992	4456.48	3395.5	-3194.1	212	1443	116.535	94	235	168160	10.6804	3.44578	265.466	176	418	383067	46.9696	3.44578	360.938	231	550	520833	66.4329	3.44578	0	px	Intensity	2.01656
Merged	113992	4456.48	3395.5	-3194.1	154	960	128.463	93	258	123324	22.1461	3.44578	406.589	182	724	390325	148.262	3.44578	349.65	240	548	335664	63.2528	3.44578	0	px	Intensity	2.00837
Merged	113992	4456.48	3395.5	-3194.1	265	812	118.095	98	237	95893	12.9206	3.44578	331.014	218	437	268783	45.6199	3.44578	326.837	191	571	265392	78.8829	3.44578	0	px	Intensity	2.00686
Merged	113992	4456.48	3395.5	-3194.1	377	1008	125.559	95	251	126563	15.5338	3.44578	380.358	236	586	383401	73.6204	3.44578	369.386	218	577	372341	75.8792	3.44578	0	px	Intensity	1.99907
Merged	113992	4456.48	3395.5	-3194.1	409	956	113.581	76	227	108583	12.3983	3.44578	248.519	196	299	237584	18.0178	3.44578	311.086	184	582	297398	81.9336	3.44578	0	px	Intensity	1.99858
Merged	113992	4456.48	3395.5	-3194.1	391	415	124.304	98	247	51586	24.4709	3.44578	218.099	171	261	90511	15.488	3.44578	457.689	312	562	189941	47.1503	3.44578	0	px	Intensity	1.98707
Merged	113992	4456.48	3395.5	-3194.1	464	199	129.312	100	256	25733	24.2201	3.44578	356.497	286	415	70943	25.9595	3.44578	386.055	273	517	76825	62.3507	3.44578	0	px	Intensity	1.97971
Merged	113992	4456.48	3395.5	-3194.1	307	541	116.181	98	230	62854	16.5461	3.44578	249.508	192	310	134984	18.1176	3.44578	311.303	195	518	168415	80.1486	3.44578	0	px	Intensity	1.97967
Merged	113992	4456.48	3395.5	-3194.1	383	292	127.805	93	253	37319	24.026	3.44578	312.332	228	399	91201	34.3368	3.44578	330.106	194	522	96391	91.4212	3.44578	0	px	Intensity	1.97958
Merged	113992	4456.48	3395.5	-3194.1	365	3194	116.183	89	229	371088	10.1721	3.44578	305.139	190	556	974615	71.2306	3.44578	405.047	216	1311	1293720	146.579	3.44578	0	px	Intensity	1.97103
Merged	113992	4456.48	3395.5	-3194.1	190	650	124.882	97	246	81173	20.5247	3.44578	296.858	193	390	192958	36.1424	3.44578	323.895	201	524	210532	84.5792	3.44578	0	px	Intensity	1.96987
Merged	113992	4456.48	3395.5	-3194.1	420	974	129.094	89	250	125738	20.7754	3.44578	373.507	197	712	363796	137.714	3.44578	323.117	176	560	314716	94.8591	3.44578	0	px	Intensity	1.93657
Merged	113992	4456.48	3395.5	-3194.1	210	625	128.054	99	247	80034	22.8661	3.44578	336.354	224	540	210221	69.7918	3.44578	317.557	182	537	198473	76.6816	3.44578	0	px	Intensity	1.92887
Merged	113992	4456.48	3395.5	-3194.1	86	489	118.658	97	227	58024	16.154	3.44578	256.526	199	319	125441	22.6587	3.44578	337.049	211	533	164817	74.7688	3.44578	0	px	Intensity	1.91305
Merged	113992	4456.48	3395.5	-3194.1	244	1481	119.878	96	228	177539	10.831	3.44578	313.249	214	442	463922	41.1565	3.44578	377.981	181	574	559790	77.423	3.44578	0	px	Intensity	1.90194
Merged	113992	4456.48	3395.5	-3194.1	113	866	120.969	86	230	104759	13.1696	3.44578	378.58	270	536	327850	47.3395	3.44578	326.042	194	530	282352	81.4853	3.44578	0	px	Intensity	1.90132
Merged	113992	4456.48	3395.5	-3194.1	312	1091	119.612	96	226	130497	12.4924	3.44578	328.828	218	488	358751	58.4016	3.44578	322.714	199	587	352081	76.3604	3.44578	0	px	Intensity	1.88944
Merged	113992	4456.48	3395.5	-3194.1	424	581	113.554	93	213	65975	12.414	3.44578	230.986	184	287	134203	17.0275	3.44578	348.103	225	519	202248	70.2185	3.44578	0	px	Intensity	1.87576
Merged	113992	4456.48	3395.5	-3194.1	465	906	121.345	98	227	109939	12.7744	3.44578	334.426	197	460	302990	44.445	3.44578	334.522	173	541	303077	82.8849	3.44578	0	px	Intensity	1.87069
Merged	113992	4456.48	3395.5	-3194.1	227	372	116.591	76	218	43372	17.1155	3.44578	233.895	179	287	87009	18.9101	3.44578	358.282	222	587	133281	78.4463	3.44578	0	px	Intensity	1.86978
Merged	113992	4456.48	3395.5	-3194.1	451	947	124.53	98	232	117930	20.3262	3.44578	221.631	125	284	209885	17.0376	3.44578	394.32	232	555	373421	74.4708	3.44578	0	px	Intensity	1.863
Merged	113992	4456.48	3395.5	-3194.1	303	474	114.051	98	212	54060	11.4205	3.44578	273.962	203	357	129858	31.2578	3.44578	373.209	256	534	176901	66.1475	3.44578	0	px	Intensity	1.85882
Merged	113992	4456.48	3395.5	-3194.1	286	1257	121.238	95	225	152396	12.8494	3.44578	373.125	241	739	469018	94.3219	3.44578	417.778	255	1112	525147	118.392	3.44578	0	px	Intensity	1.85586
Merged	113992	4456.48	3395.5	-3194.1	68	490	120.731	68	223	59158	15.6063	3.44578	320.614	215	435	157101	47.9929	3.44578	325.643	203	519	159565	76.9932	3.44578	0	px	Intensity	1.84709
Merged	113992	4456.48	3395.5	-3194.1	367	331	119.489	95	218	39551	15.5557	3.44578	276.782	188	373	91615	37.7107	3.44578	352.444	231	532	116659	71.1085	3.44578	0	px	Intensity	1.82443
Merged	113992	4456.48	3395.5	-3194.1	375	715	128.271	84	233	91714	19.9053	3.44578	366.429	224	550	261997	64.8588	3.44578	328.253	167	533	234701	92.83	3.44578	0	px	Intensity	1.81646
Merged	113992	4456.48	3395.5	-3194.1	407	1068	120.577	92	219	128776	13.0471	3.44578	309.882	216	418	330954	42.6636	3.44578	339.566	203	595	362657	82.8037	3.44578	0	px	Intensity	1.81627
Merged	113992	4456.48	3395.5	-3194.1	255	483	121.696	81	221	58779	18.8975	3.44578	254.255	210	315	122805	19.8429	3.44578	298.592	147	537	144220	101.524	3.44578	0	px	Intensity	1.81601
Merged	113992	4456.48	3395.5	-3194.1	139	451	116.206	92	210	52409	13.3397	3.44578	233.273	190	291	105206	16.61	3.44578	339.851	217	556	153273	84.2562	3.44578	0	px	Intensity	1.80713
Merged	113992	4456.48	3395.5	-3194.1	406	1042	116.212	78	208	121093	12.2807	3.44578	260.202	186	346	271131	23.6265	3.44578	331.697	193	547	345628	72.0741	3.44578	0	px	Intensity	1.78983
Merged	113992	4456.48	3395.5	-3194.1	458	974	112.866	91	201	109931	11.2321	3.44578	214.499	162	269	208922	15.8857	3.44578	405.119	226	580	394586	72.0811	3.44578	0	px	Intensity	1.78088
Merged	113992	4456.48	3395.5	-3194.1	104	742	115.666	88	203	85824	9.75288	3.44578	286.515	203	374	212594	33.2054	3.44578	318.245	180	544	236138	96.4125	3.44578	0	px	Intensity	1.75506
Merged	113992	4456.48	3395.5	-3194.1	170	1127	119.088	91	209	134212	11.5561	3.44578	365.628	219	530	412063	58.8811	3.44578	346.13	225	553	390089	67.3587	3.44578	0	px	Intensity	1.75501	Cutoff for cells with a focus
Merged	113992	4456.48	3395.5	-3194.1	120	378	120.788	96	209	45658	15.1658	3.44578	316.101	223	403	119486	37.4526	3.44578	331.81	214	525	125424	77.9125	3.44578	0	px	Intensity	1.7303
Merged	113992	4456.48	3395.5	-3194.1	259	561	113.055	80	195	63424	10.6201	3.44578	225.537	178	276	126526	15.3195	3.44578	352.31	238	554	197646	69.55	3.44578	0	px	Intensity	1.72482
Merged	113992	4456.48	3395.5	-3194.1	389	379	117.884	100	203	44678	14.2756	3.44578	231.517	176	291	87745	17.0489	3.44578	325.195	201	534	123249	75.4737	3.44578	0	px	Intensity	1.72203
Merged	113992	4456.48	3395.5	-3194.1	130	1534	123.816	74	213	189933	17.9575	3.44578	367.696	196	813	564045	155.669	3.44578	359.297	174	780	551162	107.919	3.44578	0	px	Intensity	1.7203
Merged	113992	4456.48	3395.5	-3194.1	146	331	121.903	95	209	40350	14.9518	3.44578	237.06	193	287	78467	17.557	3.44578	318.435	200	518	105402	88.5859	3.44578	0	px	Intensity	1.71447
Merged	113992	4456.48	3395.5	-3194.1	160	1083	113.393	86	193	122805	9.20821	3.44578	240.219	183	310	260157	21.5197	3.44578	349.086	217	544	378060	68.3367	3.44578	0	px	Intensity	1.70204
Merged	113992	4456.48	3395.5	-3194.1	374	852	117.606	95	200	100200	11.8532	3.44578	296.177	214	420	252343	34.7566	3.44578	309.897	182	573	264032	88.2928	3.44578	0	px	Intensity	1.7006
Merged	113992	4456.48	3395.5	-3194.1	382	763	112.911	84	192	86151	8.94523	3.44578	245.29	171	317	187156	24.345	3.44578	357.802	237	569	273003	67.5027	3.44578	0	px	Intensity	1.70046
Merged	113992	4456.48	3395.5	-3194.1	264	329	118.41	98	200	38957	16.3602	3.44578	223.34	178	268	73479	16.0932	3.44578	325.529	148	522	107099	104.847	3.44578	0	px	Intensity	1.68904
Merged	113992	4456.48	3395.5	-3194.1	411	267	122.022	101	206	32580	15.1187	3.44578	299.513	236	386	79970	22.876	3.44578	333.599	207	517	89071	82.4053	3.44578	0	px	Intensity	1.68821
Merged	113992	4456.48	3395.5	-3194.1	201	989	119.515	88	201	118200	13.1397	3.44578	264.893	197	340	261979	26.1942	3.44578	344.686	199	601	340894	82.0827	3.44578	0	px	Intensity	1.6818
Merged	113992	4456.48	3395.5	-3194.1	441	551	113.181	99	189	62363	10.6949	3.44578	228.849	186	280	126096	16.8774	3.44578	351.328	221	555	193582	81.8072	3.44578	0	px	Intensity	1.66988
Merged	113992	4456.48	3395.5	-3194.1	59	1029	120.104	91	200	123587	11.1967	3.44578	364.706	204	707	375282	111.656	3.44578	339.922	196	532	349780	74.5983	3.44578	0	px	Intensity	1.66522
Merged	113992	4456.48	3395.5	-3194.1	384	1048	118.042	89	196	123708	11.1318	3.44578	295.695	213	427	309888	39.1305	3.44578	343.861	192	556	360366	67.7337	3.44578	0	px	Intensity	1.66043
Merged	113992	4456.48	3395.5	-3194.1	323	349	119.295	93	198	41634	14.4307	3.44578	292.61	213	381	102121	33.4079	3.44578	339.708	208	527	118558	73.9733	3.44578	0	px	Intensity	1.65975
Merged	113992	4456.48	3395.5	-3194.1	148	515	114.551	94	190	58994	11.5327	3.44578	215.59	176	258	111029	15.0216	3.44578	302.217	161	544	155642	105.456	3.44578	0	px	Intensity	1.65864
Merged	113992	4456.48	3395.5	-3194.1	37	830	114.651	86	190	95160	11.0503	3.44578	258.354	183	329	214434	24.308	3.44578	314.92	192	546	261384	86.3397	3.44578	0	px	Intensity	1.65721
Merged	113992	4456.48	3395.5	-3194.1	163	1095	118.163	91	195	129388	10.8226	3.44578	324.022	206	503	354804	63.5464	3.44578	330.28	205	519	361657	75.1945	3.44578	0	px	Intensity	1.65027
Merged	113992	4456.48	3395.5	-3194.1	392	455	116.193	97	190	52868	13.2173	3.44578	225.571	178	276	102635	16.9713	3.44578	390.013	241	580	177456	66.6893	3.44578	0	px	Intensity	1.6352
Merged	113992	4456.48	3395.5	-3194.1	63	811	123.393	93	201	100072	12.8211	3.44578	397.487	235	622	322362	95.0336	3.44578	357.187	168	566	289679	81.6264	3.44578	0	px	Intensity	1.62894
Merged	113992	4456.48	3395.5	-3194.1	152	674	112.635	88	183	75916	11.7891	3.44578	231.496	175	285	156028	19.7175	3.44578	356.917	237	540	240562	73.5528	3.44578	0	px	Intensity	1.62472
Merged	113992	4456.48	3395.5	-3194.1	370	1094	114.672	92	186	125451	10.1426	3.44578	234.37	185	297	256401	19.8427	3.44578	339.889	164	561	371839	97.5563	3.44578	0	px	Intensity	1.62202
Merged	113992	4456.48	3395.5	-3194.1	332	449	114.448	80	185	51387	11.2077	3.44578	241.209	198	301	108303	18.3295	3.44578	299.882	177	518	134647	87.7726	3.44578	0	px	Intensity	1.61646
Merged	113992	4456.48	3395.5	-3194.1	236	764	121.442	86	196	92782	11.5372	3.44578	357.027	237	479	272769	54.4409	3.44578	391.22	233	617	298892	74.9925	3.44578	0	px	Intensity	1.61393
Merged	113992	4456.48	3395.5	-3194.1	174	2186	121.087	93	195	264697	9.52225	3.44578	352.629	238	530	770847	52.7615	3.44578	394.421	183	1218	862204	143.781	3.44578	0	px	Intensity	1.61041
Merged	113992	4456.48	3395.5	-3194.1	27	332	113.645	83	183	37730	12.2971	3.44578	237.072	193	308	78708	17.4008	3.44578	419.81	283	556	139377	51.9304	3.44578	0	px	Intensity	1.61028
Merged	113992	4456.48	3395.5	-3194.1	466	418	115.868	89	184	48433	12.9195	3.44578	249.438	185	309	104265	23.9973	3.44578	302.768	167	553	126557	98.1092	3.44578	0	px	Intensity	1.58801
Merged	113992	4456.48	3395.5	-3194.1	28	413	122.385	98	194	50545	12.3189	3.44578	370.927	260	477	153193	43.4289	3.44578	317.729	192	518	131222	82.0965	3.44578	0	px	Intensity	1.58516
Merged	113992	4456.48	3395.5	-3194.1	469	645	126.412	90	200	81536	15.5513	3.44578	424.808	236	722	274001	122.272	3.44578	348.336	194	567	224677	86.1545	3.44578	0	px	Intensity	1.58212
Merged	113992	4456.48	3395.5	-3194.1	297	863	135.886	95	214	117270	16.7476	3.44578	595.33	274	1024	513770	154.383	3.44578	317.462	187	544	273970	84.2474	3.44578	0	px	Intensity	1.57484
Merged	113992	4456.48	3395.5	-3194.1	235	869	117.507	95	185	102114	10.408	3.44578	288.217	207	383	250461	28.3185	3.44578	368.814	191	564	320499	87.7908	3.44578	0	px	Intensity	1.57437
Merged	113992	4456.48	3395.5	-3194.1	301	457	114.199	92	179	52189	11.0179	3.44578	230.284	184	280	105240	17.4448	3.44578	349.681	237	566	159804	75.7477	3.44578	0	px	Intensity	1.56744
Merged	113992	4456.48	3395.5	-3194.1	115	1417	125.24	95	195	177465	10.7058	3.44578	468.874	253	771	664394	87.6527	3.44578	347.666	186	587	492643	73.2304	3.44578	0	px	Intensity	1.55701
Merged	113992	4456.48	3395.5	-3194.1	94	484	113.122	93	176	54751	7.72496	3.44578	247.459	185	330	119770	21.6694	3.44578	312.779	159	539	151385	103.365	3.44578	0	px	Intensity	1.55584
Merged	113992	4456.48	3395.5	-3194.1	473	853	111.967	94	174	95508	8.29411	3.44578	218.41	159	278	186304	18.591	3.44578	308.191	165	562	262887	99.176	3.44578	0	px	Intensity	1.55403
Merged	113992	4456.48	3395.5	-3194.1	99	1259	123.874	99	191	155957	12.5851	3.44578	349.406	215	600	439902	85.2118	3.44578	372.071	168	767	468437	101.903	3.44578	0	px	Intensity	1.54189
Merged	113992	4456.48	3395.5	-3194.1	345	1768	117.26	88	180	207316	9.31405	3.44578	360.775	185	611	637851	99.7586	3.44578	394.925	230	1258	698228	132.526	3.44578	0	px	Intensity	1.53505
Merged	113992	4456.48	3395.5	-3194.1	93	670	111.527	77	171	74723	9.43343	3.44578	255.822	180	346	171401	31.8016	3.44578	380.458	242	546	254907	65.0051	3.44578	0	px	Intensity	1.53326
Merged	113992	4456.48	3395.5	-3194.1	111	417	120.755	87	184	50355	11.6376	3.44578	379.698	238	495	158334	55.7067	3.44578	316.029	191	522	131784	81.5561	3.44578	0	px	Intensity	1.52374
Merged	113992	4456.48	3395.5	-3194.1	393	746	119.639	96	182	89251	10.8356	3.44578	275.836	215	357	205774	22.605	3.44578	339.101	174	603	252969	91.6478	3.44578	0	px	Intensity	1.52124
Merged	113992	4456.48	3395.5	-3194.1	423	488	124.959	88	190	60980	12.9597	3.44578	403.99	234	577	197147	79.4691	3.44578	315.408	185	546	153919	87.6667	3.44578	0	px	Intensity	1.5205
Merged	113992	4456.48	3395.5	-3194.1	270	418	118.409	94	180	49495	13.1457	3.44578	272.533	190	387	113919	37.1128	3.44578	398.517	251	556	166580	63.4705	3.44578	0	px	Intensity	1.52015
Merged	113992	4456.48	3395.5	-3194.1	249	417	114.525	87	174	47757	10.4614	3.44578	269.662	190	351	112449	33.1812	3.44578	366.971	247	543	153027	68.3304	3.44578	0	px	Intensity	1.51932
Merged	113992	4456.48	3395.5	-3194.1	405	287	113.296	95	172	32516	9.36535	3.44578	242.01	191	297	69457	18.36	3.44578	320.334	202	521	91936	83.8507	3.44578	0	px	Intensity	1.51814
Merged	113992	4456.48	3395.5	-3194.1	26	1150	115.27	87	174	132560	8.99874	3.44578	289.53	204	407	332960	40.501	3.44578	325.319	197	528	374117	76.9756	3.44578	0	px	Intensity	1.50951
Merged	113992	4456.48	3395.5	-3194.1	231	1266	118.937	97	179	150574	10.1767	3.44578	337.485	198	607	427256	96.8449	3.44578	344.355	178	548	435953	88.0506	3.44578	0	px	Intensity	1.505
Merged	113992	4456.48	3395.5	-3194.1	224	403	113.531	91	170	45753	10.7207	3.44578	233.685	185	300	94175	18.2379	3.44578	354.323	259	555	142792	75.1568	3.44578	0	px	Intensity	1.49739
Merged	113992	4456.48	3395.5	-3194.1	402	742	117.043	84	175	86846	9.41429	3.44578	306.062	234	380	227098	22.9531	3.44578	369.164	216	550	273920	78.512	3.44578	0	px	Intensity	1.49518
Merged	113992	4456.48	3395.5	-3194.1	129	350	118.5	98	177	41475	11.6331	3.44578	262.64	194	334	91924	25.1464	3.44578	309.094	169	524	108183	97.9419	3.44578	0	px	Intensity	1.49367
Merged	113992	4456.48	3395.5	-3194.1	199	791	112.14	89	167	88703	8.65448	3.44578	223.119	178	271	176487	15.6564	3.44578	357.346	235	565	282661	69.2463	3.44578	0	px	Intensity	1.48921
Merged	113992	4456.48	3395.5	-3194.1	338	1828	115.155	79	171	210503	8.58656	3.44578	305.613	203	496	558660	58.7617	3.44578	353.495	212	822	646188	82.5613	3.44578	0	px	Intensity	1.48496
Merged	113992	4456.48	3395.5	-3194.1	397	587	114.382	92	169	67142	9.02027	3.44578	271.978	196	366	159651	31.8497	3.44578	318.341	195	554	186866	80.9071	3.44578	0	px	Intensity	1.47751
Merged	113992	4456.48	3395.5	-3194.1	395	915	120.612	91	178	110360	11.0997	3.44578	395.063	215	598	361483	80.058	3.44578	361.189	232	571	330488	70.8617	3.44578	0	px	Intensity	1.47581
Merged	113992	4456.48	3395.5	-3194.1	237	1170	118.886	94	175	139097	11.0116	3.44578	234.861	179	288	274787	16.9689	3.44578	333.494	177	785	390188	93.5416	3.44578	0	px	Intensity	1.47199
Merged	113992	4456.48	3395.5	-3194.1	404	388	118.923	96	175	46142	11.1512	3.44578	324.655	215	436	125966	42.5756	3.44578	306.137	180	515	118781	84.5387	3.44578	0	px	Intensity	1.47154
Merged	113992	4456.48	3395.5	-3194.1	73	789	116.245	95	171	91717	9.49913	3.44578	288.58	224	364	227690	22.4411	3.44578	354.954	216	558	280059	82.4313	3.44578	0	px	Intensity	1.47104
Merged	113992	4456.48	3395.5	-3194.1	181	2367	122.449	86	180	289836	11.488	3.44578	407.27	225	955	964009	139.729	3.44578	382.409	177	950	905162	122.874	3.44578	0	px	Intensity	1.47
Merged	113992	4456.48	3395.5	-3194.1	356	385	143.569	97	211	55274	25.778	3.44578	388.094	212	611	149416	108.428	3.44578	389.143	240	554	149820	72.2893	3.44578	0	px	Intensity	1.46968
Merged	113992	4456.48	3395.5	-3194.1	278	1592	114.881	85	168	182890	7.5183	3.44578	300.955	206	398	479120	34.8338	3.44578	347.126	169	771	552624	101.465	3.44578	0	px	Intensity	1.46239
Merged	113992	4456.48	3395.5	-3194.1	232	934	112.576	85	164	105146	8.06591	3.44578	242.719	179	298	226700	21.2231	3.44578	339.315	165	532	316920	89.7287	3.44578	0	px	Intensity	1.45679
Merged	113992	4456.48	3395.5	-3194.1	122	656	112.041	94	163	73499	8.38164	3.44578	224.312	179	278	147149	15.7631	3.44578	303.02	169	536	198781	98.1259	3.44578	0	px	Intensity	1.45482
Merged	113992	4456.48	3395.5	-3194.1	1	55278	108.734	43	158	6010597	5.11466	3.44578	215.121	92	278	11891433	14.8375	3.44578	562.807	96	731	31110820	34.557	3.44578	0	px	Intensity	1.45309
Merged	113992	4456.48	3395.5	-3194.1	266	1272	113.042	84	164	143790	7.38302	3.44578	253.785	187	316	322814	18.6921	3.44578	326.399	176	596	415179	93.71	3.44578	0	px	Intensity	1.45078
Merged	113992	4456.48	3395.5	-3194.1	24	442	112.253	86	162	49616	9.25232	3.44578	242.661	186	308	107256	23.0118	3.44578	347.9	211	537	153772	69.5544	3.44578	0	px	Intensity	1.44316
Merged	113992	4456.48	3395.5	-3194.1	442	446	112.305	95	162	50088	8.16529	3.44578	250.054	182	310	111524	24.9708	3.44578	370.814	228	552	165383	77.1422	3.44578	0	px	Intensity	1.4425
Merged	113992	4456.48	3395.5	-3194.1	347	1369	115.298	84	166	157843	8.65325	3.44578	316.857	189	480	433777	77.0648	3.44578	387.307	221	564	530223	66.3841	3.44578	0	px	Intensity	1.43975
Merged	113992	4456.48	3395.5	-3194.1	116	538	113.55	95	163	61090	7.89538	3.44578	288.216	202	393	155060	39.2394	3.44578	344.507	232	537	185345	69.0959	3.44578	0	px	Intensity	1.43549
Merged	113992	4456.48	3395.5	-3194.1	462	352	158.929	119	228	55943	20.3673	3.44578	973.5	604	1365	342672	156.019	3.44578	378.057	215	542	133076	77.9963	3.44578	0	px	Intensity	1.4346
Merged	113992	4456.48	3395.5	-3194.1	294	1089	113.896	89	163	124033	8.5047	3.44578	281.123	214	384	306143	25.9564	3.44578	332.012	178	588	361561	90.1179	3.44578	0	px	Intensity	1.43113
Merged	113992	4456.48	3395.5	-3194.1	197	658	120.579	97	172	79341	10.921	3.44578	415.837	223	815	273621	157.206	3.44578	326.488	167	914	214829	94.692	3.44578	0	px	Intensity	1.42645
Merged	113992	4456.48	3395.5	-3194.1	208	787	122.008	98	174	96020	15.3754	3.44578	496.355	185	1325	390631	301.126	3.44578	360.268	216	542	283531	71.4464	3.44578	0	px	Intensity	1.42614
Merged	113992	4456.48	3395.5	-3194.1	157	925	113.741	88	162	105210	8.74011	3.44578	228.806	174	290	211646	15.9152	3.44578	340.549	160	543	315008	94.0027	3.44578	0	px	Intensity	1.42429
Merged	113992	4456.48	3395.5	-3194.1	41	298	125.215	92	178	37314	10.1718	3.44578	462.826	302	601	137922	66.6814	3.44578	328.802	214	529	97983	73.5082	3.44578	0	px	Intensity	1.42156
Merged	113992	4456.48	3395.5	-3194.1	50	327	116.813	92	166	38198	8.01685	3.44578	347.957	260	420	113782	29.96	3.44578	312.645	183	513	102235	86.74	3.44578	0	px	Intensity	1.42107
Merged	113992	4456.48	3395.5	-3194.1	300	403	108.325	96	153	43655	5.23502	3.44578	219.39	176	280	88414	17.2127	3.44578	479.792	379	609	193356	34.3991	3.44578	0	px	Intensity	1.41242
Merged	113992	4456.48	3395.5	-3194.1	372	481	116.256	97	164	55919	9.34913	3.44578	260.326	208	320	125217	17.7904	3.44578	371.611	188	545	178745	111.658	3.44578	0	px	Intensity	1.41068
Merged	113992	4456.48	3395.5	-3194.1	79	1226	116.681	83	164	143051	9.14263	3.44578	353.844	209	753	433813	108.164	3.44578	354.784	220	562	434965	76.4364	3.44578	0	px	Intensity	1.40554
Merged	113992	4456.48	3395.5	-3194.1	38	280	129.718	99	182	36321	13.6562	3.44578	475.061	331	614	133017	68.0652	3.44578	326.25	205	517	91350	74.7626	3.44578	0	px	Intensity	1.40305
Merged	113992	4456.48	3395.5	-3194.1	127	527	116.975	98	164	61646	10.003	3.44578	245.552	193	297	129406	17.0316	3.44578	302.763	175	594	159556	95.2584	3.44578	0	px	Intensity	1.402
Merged	113992	4456.48	3395.5	-3194.1	461	516	120.025	97	168	61933	10.1474	3.44578	371.762	214	567	191829	86.209	3.44578	365.227	222	533	188457	74.9134	3.44578	0	px	Intensity	1.39971
Merged	113992	4456.48	3395.5	-3194.1	112	1099	118.803	91	166	130564	10.7254	3.44578	345.298	200	571	379483	98.7816	3.44578	333.113	202	558	366091	71.7779	3.44578	0	px	Intensity	1.39728
Merged	113992	4456.48	3395.5	-3194.1	52	669	139.698	102	195	93458	18.9642	3.44578	794.679	316	1403	531640	287.181	3.44578	311.448	198	527	208359	76.5245	3.44578	0	px	Intensity	1.39587
Merged	113992	4456.48	3395.5	-3194.1	221	1006	122.563	93	171	123298	10.5159	3.44578	385.752	235	671	388067	77.8935	3.44578	347.332	195	984	349416	112.927	3.44578	0	px	Intensity	1.39521
Merged	113992	4456.48	3395.5	-3194.1	257	940	126.18	88	176	118609	14.6964	3.44578	450.627	255	908	423589	193.051	3.44578	366.734	201	552	344730	84.0066	3.44578	0	px	Intensity	1.39484
Merged	113992	4456.48	3395.5	-3194.1	302	427	111.852	93	156	47761	6.80669	3.44578	244.33	179	299	104329	19.2462	3.44578	306.988	169	580	131084	102.77	3.44578	0	px	Intensity	1.39469
Merged	113992	4456.48	3395.5	-3194.1	114	294	122.639	102	171	36056	11.4653	3.44578	294.432	219	358	86563	26.5143	3.44578	328.99	161	564	96723	98.7523	3.44578	0	px	Intensity	1.39433
Merged	113992	4456.48	3395.5	-3194.1	251	440	116.095	89	161	51082	9.64932	3.44578	282.791	182	383	124428	39.5072	3.44578	380.891	218	555	167592	75.9648	3.44578	0	px	Intensity	1.38679
Merged	113992	4456.48	3395.5	-3194.1	106	1115	120.803	100	167	134695	9.22057	3.44578	337.398	223	499	376199	52.0148	3.44578	364.759	174	574	406706	85.098	3.44578	0	px	Intensity	1.38242
Merged	113992	4456.48	3395.5	-3194.1	320	527	108.715	98	150	57293	4.76641	3.44578	217.782	174	267	114771	14.8297	3.44578	501.734	410	588	264414	25.4283	3.44578	0	px	Intensity	1.37975
Merged	113992	4456.48	3395.5	-3194.1	350	2764	119.059	89	164	329079	8.81909	3.44578	384.438	244	497	1062587	42.457	3.44578	458.397	209	973	1267009	117.452	3.44578	0	px	Intensity	1.37747
Merged	113992	4456.48	3395.5	-3194.1	183	645	112.722	87	155	72706	8.177	3.44578	258.078	207	319	166460	20.1301	3.44578	349.949	228	530	225717	71.4939	3.44578	0	px	Intensity	1.37506
Merged	113992	4456.48	3395.5	-3194.1	141	184	141.288	108	194	25997	13.4786	3.44578	639.228	521	739	117618	47.2367	3.44578	402.777	247	596	74111	76.9585	3.44578	0	px	Intensity	1.37308
Merged	113992	4456.48	3395.5	-3194.1	225	193	110.052	97	151	21240	5.65225	3.44578	234.223	177	269	45205	15.5128	3.44578	451.093	354	554	87061	48.104	3.44578	0	px	Intensity	1.37208
Merged	113992	4456.48	3395.5	-3194.1	144	684	121.727	95	167	83261	12.2617	3.44578	407.538	227	867	278756	168.246	3.44578	325.354	171	539	222542	95.1418	3.44578	0	px	Intensity	1.37193
Merged	113992	4456.48	3395.5	-3194.1	245	221	125.394	104	172	27712	9.57055	3.44578	484.484	364	680	107071	56.8654	3.44578	360.253	205	545	79616	70.181	3.44578	0	px	Intensity	1.37168
Merged	113992	4456.48	3395.5	-3194.1	474	971	120.474	97	165	116980	9.96447	3.44578	412.372	260	587	400413	61.5409	3.44578	323.35	174	754	313973	98.9552	3.44578	0	px	Intensity	1.36959
Merged	113992	4456.48	3395.5	-3194.1	457	750	119.975	77	164	89981	9.68461	3.44578	398.24	239	565	298680	73.083	3.44578	327.641	177	563	245731	89.2002	3.44578	0	px	Intensity	1.36696
Merged	113992	4456.48	3395.5	-3194.1	379	681	113.458	93	155	77265	8.06591	3.44578	229.944	187	275	156592	15.8189	3.44578	305.479	174	519	208031	95.8845	3.44578	0	px	Intensity	1.36614
Merged	113992	4456.48	3395.5	-3194.1	318	345	119.574	98	163	41253	9.72963	3.44578	380.206	216	549	131171	88.5232	3.44578	348.916	221	537	120376	79.6329	3.44578	0	px	Intensity	1.36317
Merged	113992	4456.48	3395.5	-3194.1	280	948	117.63	89	160	111513	9.00967	3.44578	301.639	209	411	285954	44.157	3.44578	324.717	205	524	307832	75.3248	3.44578	0	px	Intensity	1.3602
Merged	113992	4456.48	3395.5	-3194.1	36	864	111.219	93	151	96093	6.59189	3.44578	232.606	179	310	200972	21.165	3.44578	312.366	170	603	269884	97.1282	3.44578	0	px	Intensity	1.35768
Merged	113992	4456.48	3395.5	-3194.1	422	412	110.682	88	150	45601	6.23271	3.44578	250.01	190	324	103004	24.4889	3.44578	301.971	161	525	124412	107.566	3.44578	0	px	Intensity	1.35523
Merged	113992	4456.48	3395.5	-3194.1	46	717	113.771	88	154	81574	7.13341	3.44578	290.113	204	388	208011	33.0991	3.44578	357.215	220	518	256123	66.344	3.44578	0	px	Intensity	1.35359
Merged	113992	4456.48	3395.5	-3194.1	438	621	115.338	94	156	71625	7.90845	3.44578	268.902	191	352	166988	24.179	3.44578	303.874	167	565	188706	95.4761	3.44578	0	px	Intensity	1.35254
Merged	113992	4456.48	3395.5	-3194.1	49	1206	113.204	96	153	136524	6.92425	3.44578	277.87	202	388	335111	37.1629	3.44578	319.173	181	664	384923	92.3574	3.44578	0	px	Intensity	1.35154
Merged	113992	4456.48	3395.5	-3194.1	271	861	115.462	79	156	99413	7.27811	3.44578	303.83	221	427	261598	43.72	3.44578	320.964	177	561	276350	85.4699	3.44578	0	px	Intensity	1.35109
Merged	113992	4456.48	3395.5	-3194.1	229	962	109.822	88	148	105649	6.13311	3.44578	217.922	170	272	209641	15.3626	3.44578	333.281	175	558	320616	90.2891	3.44578	0	px	Intensity	1.34763
Merged	113992	4456.48	3395.5	-3194.1	333	409	112.098	92	151	45848	7.3433	3.44578	266.105	184	338	108837	27.0145	3.44578	345.117	227	617	141153	74.173	3.44578	0	px	Intensity	1.34704
Merged	113992	4456.48	3395.5	-3194.1	414	492	110.114	87	148	54176	6.00339	3.44578	230.813	180	280	113560	16.9437	3.44578	307.071	168	553	151079	97.4978	3.44578	0	px	Intensity	1.34406
Merged	113992	4456.48	3395.5	-3194.1	214	747	111.708	96	150	83446	6.4593	3.44578	237.873	182	310	177691	18.9544	3.44578	383.56	236	547	286519	69.9523	3.44578	0	px	Intensity	1.34278
Merged	113992	4456.48	3395.5	-3194.1	453	1165	116.368	87	156	135569	8.55727	3.44578	283.151	195	381	329871	28.9416	3.44578	366.985	215	608	427538	75.1675	3.44578	0	px	Intensity	1.34057
Merged	113992	4456.48	3395.5	-3194.1	325	1136	112.212	93	150	127473	7.00516	3.44578	245.338	177	309	278704	19.4129	3.44578	322.574	177	552	366444	89.3541	3.44578	0	px	Intensity	1.33675
Merged	113992	4456.48	3395.5	-3194.1	195	420	112.421	94	150	47217	6.50629	3.44578	234.857	183	288	98640	16.3378	3.44578	300.379	171	519	126159	88.9986	3.44578	0	px	Intensity	1.33427
Merged	113992	4456.48	3395.5	-3194.1	192	886	116.508	94	155	103226	7.91359	3.44578	307.871	223	390	272774	30.7061	3.44578	351.317	223	560	311267	67.1353	3.44578	0	px	Intensity	1.33038
Merged	113992	4456.48	3395.5	-3194.1	299	421	121.784	101	162	51271	10.0195	3.44578	484.152	237	670	203828	97.9651	3.44578	368.905	237	520	155309	69.9406	3.44578	0	px	Intensity	1.33023
Merged	113992	4456.48	3395.5	-3194.1	426	1365	112.084	85	149	152994	7.05965	3.44578	244.155	173	378	333271	41.1375	3.44578	305.966	157	564	417644	94.8765	3.44578	0	px	Intensity	1.32937
Merged	113992	4456.48	3395.5	-3194.1	387	704	113.598	88	151	79973	8.07962	3.44578	263.896	180	353	185783	25.1619	3.44578	316.3	157	542	222675	97.916	3.44578	0	px	Intensity	1.32925
Merged	113992	4456.48	3395.5	-3194.1	90	458	112.12	94	149	51351	6.54876	3.44578	240.338	193	311	110075	17.295	3.44578	328.753	197	527	150569	77.9954	3.44578	0	px	Intensity	1.32893
Merged	113992	4456.48	3395.5	-3194.1	241	1053	131.818	101	175	138804	11.6828	3.44578	475.356	293	739	500550	76.4915	3.44578	335.728	172	954	353522	130.093	3.44578	0	px	Intensity	1.32759
Merged	113992	4456.48	3395.5	-3194.1	373	873	114.726	84	152	100156	7.18888	3.44578	262.123	191	362	228833	28.5499	3.44578	314.897	177	551	274905	86.8135	3.44578	0	px	Intensity	1.32489
Merged	113992	4456.48	3395.5	-3194.1	298	832	114.004	92	151	94851	8.0574	3.44578	278.284	196	413	231532	36.3559	3.44578	397.59	214	584	330795	80.7484	3.44578	0	px	Intensity	1.32452
Merged	113992	4456.48	3395.5	-3194.1	276	1014	112.633	86	149	114210	6.61119	3.44578	252.373	194	337	255906	21.5148	3.44578	396.884	260	595	402440	61.7529	3.44578	0	px	Intensity	1.32288
Merged	113992	4456.48	3395.5	-3194.1	263	555	111.944	97	148	62129	6.63162	3.44578	245.481	196	308	136242	18.8396	3.44578	332.103	219	562	184317	75.5965	3.44578	0	px	Intensity	1.32209
Merged	113992	4456.48	3395.5	-3194.1	125	467	110.52	82	146	51613	6.49876	3.44578	228.133	186	281	106538	16.4632	3.44578	358.263	245	530	167309	66.6437	3.44578	0	px	Intensity	1.32102
Merged	113992	4456.48	3395.5	-3194.1	248	1258	115.065	74	152	144752	7.95737	3.44578	272.847	190	374	343241	24.764	3.44578	339.784	177	851	427448	129.215	3.44578	0	px	Intensity	1.32099
Merged	113992	4456.48	3395.5	-3194.1	175	751	112.095	95	148	84183	6.36365	3.44578	232.783	178	294	174820	17.0033	3.44578	336.272	221	546	252540	72.8945	3.44578	0	px	Intensity	1.32031
Merged	113992	4456.48	3395.5	-3194.1	151	358	129.721	98	171	46440	13.1389	3.44578	510.715	275	844	182836	153.164	3.44578	370.729	193	535	132721	92.1966	3.44578	0	px	Intensity	1.31822
Merged	113992	4456.48	3395.5	-3194.1	337	543	114.589	85	151	62222	7.4601	3.44578	313.059	217	405	169991	38.3257	3.44578	340.422	237	549	184849	68.4089	3.44578	0	px	Intensity	1.31775
Merged	113992	4456.48	3395.5	-3194.1	324	326	109.285	97	144	35627	5.51334	3.44578	226.16	176	271	73728	16.728	3.44578	377.021	204	567	122909	90.6392	3.44578	0	px	Intensity	1.31765
Merged	113992	4456.48	3395.5	-3194.1	319	669	111.586	88	147	74651	7.49491	3.44578	236.985	181	288	158543	16.8773	3.44578	353.927	231	581	236777	74.7474	3.44578	0	px	Intensity	1.31737
Merged	113992	4456.48	3395.5	-3194.1	277	627	115.499	90	152	72418	7.10892	3.44578	303.289	222	419	190162	40.0001	3.44578	334.399	196	919	209668	117.133	3.44578	0	px	Intensity	1.31603
Merged	113992	4456.48	3395.5	-3194.1	361	578	113.381	93	149	65534	6.64434	3.44578	286.678	202	360	165700	31.1907	3.44578	341.984	227	532	197667	70.2604	3.44578	0	px	Intensity	1.31416
Merged	113992	4456.48	3395.5	-3194.1	74	777	118.744	92	156	92264	8.23863	3.44578	430.089	207	650	334179	100.521	3.44578	341.758	217	525	265546	68.6615	3.44578	0	px	Intensity	1.31375
Merged	113992	4456.48	3395.5	-3194.1	33	813	109.621	93	144	89122	6.01599	3.44578	218.535	155	269	177669	15.2943	3.44578	317.658	183	532	258256	88.5502	3.44578	0	px	Intensity	1.31362
Merged	113992	4456.48	3395.5	-3194.1	428	525	115.758	99	152	60773	7.65389	3.44578	321.869	216	460	168981	45.3225	3.44578	300.604	181	550	157817	87.9612	3.44578	0	px	Intensity	1.31308
Merged	113992	4456.48	3395.5	-3194.1	89	1194	115.822	85	152	138292	7.7366	3.44578	308.532	209	439	368387	41.68	3.44578	346.998	210	789	414316	86.4464	3.44578	0	px	Intensity	1.31235
Merged	113992	4456.48	3395.5	-3194.1	272	429	118.93	94	156	51021	9.54478	3.44578	271.499	206	328	116473	23.4281	3.44578	307.713	174	548	132009	98.4669	3.44578	0	px	Intensity	1.3117
Merged	113992	4456.48	3395.5	-3194.1	359	560	114.418	96	150	64074	7.06993	3.44578	308.707	212	396	172876	33.3553	3.44578	301.973	161	542	169105	102.821	3.44578	0	px	Intensity	1.31098
Merged	113992	4456.48	3395.5	-3194.1	75	1090	109.139	85	143	118961	5.51165	3.44578	223.902	169	276	244053	15.3736	3.44578	499.521	414	624	544478	26.7549	3.44578	0	px	Intensity	1.31026
Merged	113992	4456.48	3395.5	-3194.1	135	1691	116.209	86	152	196510	7.74482	3.44578	280.855	195	383	474926	33.5894	3.44578	411.629	192	1176	696064	161.233	3.44578	0	px	Intensity	1.30798
Merged	113992	4456.48	3395.5	-3194.1	293	1311	118.523	79	155	155384	9.16811	3.44578	375.481	216	643	492255	94.5504	3.44578	332.119	162	597	435408	89.6153	3.44578	0	px	Intensity	1.30776
Merged	113992	4456.48	3395.5	-3194.1	281	874	110.214	89	144	96327	6.19269	3.44578	241.928	175	328	211445	23.0053	3.44578	394.8	242	548	345055	69.1137	3.44578	0	px	Intensity	1.30655
Merged	113992	4456.48	3395.5	-3194.1	55	442	121.385	96	158	53652	9.39158	3.44578	454.812	255	653	201027	99.6435	3.44578	329.5	200	540	145639	79.6583	3.44578	0	px	Intensity	1.30165
Merged	113992	4456.48	3395.5	-3194.1	431	2229	109.099	92	142	243181	5.19002	3.44578	225.828	173	291	503371	15.8087	3.44578	501.41	324	604	1117642	34.2259	3.44578	0	px	Intensity	1.30157
Merged	113992	4456.48	3395.5	-3194.1	84	565	111.481	98	145	62987	6.10459	3.44578	227.43	167	281	128498	15.9283	3.44578	336.448	223	536	190093	71.5101	3.44578	0	px	Intensity	1.30067
Merged	113992	4456.48	3395.5	-3194.1	258	522	112.251	66	146	58595	6.82732	3.44578	270.218	184	368	141054	39.7479	3.44578	346.247	231	552	180741	74.223	3.44578	0	px	Intensity	1.30066
Merged	113992	4456.48	3395.5	-3194.1	250	499	130.072	101	169	64906	12.9312	3.44578	526.717	286	901	262832	160.778	3.44578	370.926	206	530	185092	73.9656	3.44578	0	px	Intensity	1.29928
Merged	113992	4456.48	3395.5	-3194.1	456	1324	116.247	94	151	153911	8.10863	3.44578	290.693	209	397	384878	27.7821	3.44578	368.626	168	853	488061	113.775	3.44578	0	px	Intensity	1.29896
Merged	113992	4456.48	3395.5	-3194.1	368	637	111.813	94	145	71225	6.33685	3.44578	226.298	179	275	144152	15.2217	3.44578	314.743	188	519	200491	78.3212	3.44578	0	px	Intensity	1.29681
Merged	113992	4456.48	3395.5	-3194.1	64	697	117.234	94	152	81712	8.11979	3.44578	326.593	217	565	227635	73.9038	3.44578	316.918	186	550	220892	85.4603	3.44578	0	px	Intensity	1.29655
Merged	113992	4456.48	3395.5	-3194.1	446	832	108.77	94	141	90497	5.30876	3.44578	214.424	178	264	178401	14.59	3.44578	503.778	420	589	419143	27.5058	3.44578	0	px	Intensity	1.29631
Merged	113992	4456.48	3395.5	-3194.1	107	941	117.303	94	152	110382	9.63819	3.44578	354.947	194	710	334005	135.98	3.44578	345.643	226	649	325250	70.1193	3.44578	0	px	Intensity	1.29579
Merged	113992	4456.48	3395.5	-3194.1	291	411	117.582	100	152	48326	8.01812	3.44578	341.73	226	444	140451	39.6684	3.44578	303.603	179	543	124781	83.6791	3.44578	0	px	Intensity	1.29272
Merged	113992	4456.48	3395.5	-3194.1	29	368	119.997	93	155	44159	9.55609	3.44578	443.179	235	601	163090	82.3058	3.44578	319.016	196	521	117398	80.9294	3.44578	0	px	Intensity	1.2917
Merged	113992	4456.48	3395.5	-3194.1	76	289	122.343	102	158	35357	9.58225	3.44578	421.782	255	628	121895	100.359	3.44578	309.841	176	528	89544	100.374	3.44578	0	px	Intensity	1.29146
Merged	113992	4456.48	3395.5	-3194.1	82	488	111.529	89	144	54426	6.6193	3.44578	242.873	185	323	118522	24.2154	3.44578	329.76	208	534	160923	80.5041	3.44578	0	px	Intensity	1.29115
Merged	113992	4456.48	3395.5	-3194.1	101	776	113.857	86	147	88353	7.44424	3.44578	281.144	201	377	218168	31.6161	3.44578	344.671	205	565	267465	73.9144	3.44578	0	px	Intensity	1.29109
Merged	113992	4456.48	3395.5	-3194.1	230	810	116.98	78	151	94754	8.78271	3.44578	296.427	210	440	240106	42.8009	3.44578	331.586	200	539	268585	78.5321	3.44578	0	px	Intensity	1.29082
Merged	113992	4456.48	3395.5	-3194.1	452	1586	108.527	75	140	172124	5.20398	3.44578	217.721	160	273	345305	15.0004	3.44578	503.714	412	599	798890	28.1929	3.44578	0	px	Intensity	1.29
Merged	113992	4456.48	3395.5	-3194.1	437	718	114.164	79	147	81970	7.44426	3.44578	295.482	207	389	212156	32.0167	3.44578	298.245	177	539	214140	88.8108	3.44578	0	px	Intensity	1.28762
Merged	113992	4456.48	3395.5	-3194.1	436	521	123.52	100	159	64354	9.68971	3.44578	538.061	333	760	280330	103.464	3.44578	370.326	229	556	192940	77.5279	3.44578	0	px	Intensity	1.28724
Merged	113992	4456.48	3395.5	-3194.1	260	329	132.076	107	170	43453	10.5934	3.44578	551.967	352	768	181597	82.5832	3.44578	369.526	224	545	121574	74.8508	3.44578	0	px	Intensity	1.28714
Merged	113992	4456.48	3395.5	-3194.1	145	500	111.102	88	143	55551	5.96533	3.44578	224.406	185	274	112203	15.3096	3.44578	308.512	186	571	154256	90.5683	3.44578	0	px	Intensity	1.28711
Merged	113992	4456.48	3395.5	-3194.1	390	603	113.441	95	146	68405	7.77508	3.44578	229.823	129	286	138583	19.6787	3.44578	401.544	250	551	242131	61.5206	3.44578	0	px	Intensity	1.28701
Merged	113992	4456.48	3395.5	-3194.1	98	1048	113.467	75	146	118913	7.44031	3.44578	269.335	195	411	282263	35.11	3.44578	327.173	182	579	342877	86.9942	3.44578	0	px	Intensity	1.28672
Merged	113992	4456.48	3395.5	-3194.1	87	1795	110.54	69	142	198420	6.4307	3.44578	240.823	169	306	432278	21.7376	3.44578	358.674	194	570	643820	75.0842	3.44578	0	px	Intensity	1.2846
Merged	113992	4456.48	3395.5	-3194.1	344	448	113.779	94	146	50973	7.11365	3.44578	272.319	187	359	121999	29.696	3.44578	336.574	234	539	150785	76.9561	3.44578	0	px	Intensity	1.28319
Merged	113992	4456.48	3395.5	-3194.1	69	492	120.803	98	155	59435	8.86065	3.44578	353.116	243	501	173733	42.7639	3.44578	404.394	265	552	198962	65.9057	3.44578	0	px	Intensity	1.28308
Merged	113992	4456.48	3395.5	-3194.1	328	177	109.921	95	141	19456	6.23088	3.44578	230.26	192	269	40756	15.732	3.44578	504.593	410	614	89313	24.2264	3.44578	0	px	Intensity	1.28274
Merged	113992	4456.48	3395.5	-3194.1	191	819	113.845	91	146	93239	6.93006	3.44578	275.448	204	405	225592	24.4916	3.44578	338.799	188	971	277476	109.593	3.44578	0	px	Intensity	1.28245
Merged	113992	4456.48	3395.5	-3194.1	159	679	112.302	92	144	76253	6.47778	3.44578	240.975	183	289	163622	17.68	3.44578	318.882	167	523	216521	86.6932	3.44578	0	px	Intensity	1.28226
Merged	113992	4456.48	3395.5	-3194.1	341	713	120.182	76	154	85690	9.06817	3.44578	373.769	213	621	266497	96.4376	3.44578	299.927	159	538	213848	87.2355	3.44578	0	px	Intensity	1.28139
Merged	113992	4456.48	3395.5	-3194.1	396	603	113.272	84	145	68303	7.12769	3.44578	241.972	186	307	145909	20.4242	3.44578	323.779	175	524	195239	96.4515	3.44578	0	px	Intensity	1.2801
Merged	113992	4456.48	3395.5	-3194.1	47	911	115.662	95	148	105368	8.18146	3.44578	293.659	210	477	267523	53.7922	3.44578	323.727	189	569	294915	80.912	3.44578	0	px	Intensity	1.27959
Merged	113992	4456.48	3395.5	-3194.1	138	212	110.33	86	141	23390	6.28057	3.44578	227.656	168	270	48263	17.5044	3.44578	472.066	377	556	100078	36.3066	3.44578	0	px	Intensity	1.27798
Merged	113992	4456.48	3395.5	-3194.1	349	416	112.772	89	144	46913	6.88039	3.44578	252.983	185	315	105241	22.087	3.44578	361.026	228	577	150187	77.6112	3.44578	0	px	Intensity	1.27692
Merged	113992	4456.48	3395.5	-3194.1	153	364	112.775	94	144	41050	6.76199	3.44578	234.376	181	283	85313	16.4283	3.44578	312.47	168	519	113739	91.6402	3.44578	0	px	Intensity	1.27688
Merged	113992	4456.48	3395.5	-3194.1	44	418	110.452	94	141	46169	6.28347	3.44578	206.517	169	246	86324	13.8637	3.44578	332.605	163	565	139029	102.178	3.44578	0	px	Intensity	1.27657
Merged	113992	4456.48	3395.5	-3194.1	316	611	112.062	88	143	68470	6.49426	3.44578	236.489	178	299	144495	17.8683	3.44578	328.545	210	547	200741	80.7324	3.44578	0	px	Intensity	1.27608
Merged	113992	4456.48	3395.5	-3194.1	203	530	111.43	82	142	59058	6.80528	3.44578	224.46	181	273	118964	14.8367	3.44578	368.842	204	575	195486	76.9099	3.44578	0	px	Intensity	1.27434
Merged	113992	4456.48	3395.5	-3194.1	330	410	111.483	83	142	45708	6.51254	3.44578	251.5	194	312	103115	21.8124	3.44578	358.412	227	544	146949	75.1415	3.44578	0	px	Intensity	1.27374
Merged	113992	4456.48	3395.5	-3194.1	178	388	114.701	88	146	44504	7.21146	3.44578	321.304	225	420	124666	42.4816	3.44578	303.327	142	574	117691	100.839	3.44578	0	px	Intensity	1.27287
Merged	113992	4456.48	3395.5	-3194.1	204	647	110.842	90	141	71715	6.10448	3.44578	229.34	177	276	148383	16.6307	3.44578	360.448	233	565	233210	66.615	3.44578	0	px	Intensity	1.27208
Merged	113992	4456.48	3395.5	-3194.1	427	452	125.029	87	159	56513	11.718	3.44578	444.856	236	678	201075	107.592	3.44578	338.002	205	532	152777	79.4191	3.44578	0	px	Intensity	1.27171
Merged	113992	4456.48	3395.5	-3194.1	415	660	117.221	86	149	77366	9.62081	3.44578	436.424	214	682	288040	121.788	3.44578	382.05	224	568	252153	77.0376	3.44578	0	px	Intensity	1.2711
Merged	113992	4456.48	3395.5	-3194.1	313	440	110.141	95	140	48462	5.56388	3.44578	233.139	194	288	102581	16.0397	3.44578	502.75	421	593	221210	25.9577	3.44578	0	px	Intensity	1.2711
Merged	113992	4456.48	3395.5	-3194.1	158	400	116.56	89	148	46624	8.50018	3.44578	406.613	231	607	162645	98.2695	3.44578	378.767	255	548	151507	66.5288	3.44578	0	px	Intensity	1.26973
Merged	113992	4456.48	3395.5	-3194.1	211	647	116.564	96	148	75417	8.26515	3.44578	306.645	231	446	198399	39.9632	3.44578	320.728	184	561	207511	73.4673	3.44578	0	px	Intensity	1.26969
Merged	113992	4456.48	3395.5	-3194.1	117	680	114.354	97	145	77761	7.02164	3.44578	305.432	194	436	207694	42.8107	3.44578	358.719	234	563	243929	70.2596	3.44578	0	px	Intensity	1.26799
Merged	113992	4456.48	3395.5	-3194.1	226	629	112.006	93	142	70452	6.47349	3.44578	241.145	180	320	151680	20.3728	3.44578	378.456	242	538	238049	67.3359	3.44578	0	px	Intensity	1.26779
Merged	113992	4456.48	3395.5	-3194.1	91	631	110.483	91	140	69715	6.04336	3.44578	235.534	169	310	148622	21.537	3.44578	364.135	223	547	229769	74.4784	3.44578	0	px	Intensity	1.26716
Merged	113992	4456.48	3395.5	-3194.1	165	562	112.963	94	143	63485	6.97551	3.44578	286.975	208	376	161280	29.8004	3.44578	310.861	166	528	174704	88.1496	3.44578	0	px	Intensity	1.26591
Merged	113992	4456.48	3395.5	-3194.1	128	393	109.837	96	139	43166	5.49025	3.44578	231.224	187	279	90871	16.3878	3.44578	309.514	149	546	121639	91.5404	3.44578	0	px	Intensity	1.26551
Merged	113992	4456.48	3395.5	-3194.1	32	570	111.447	88	141	63525	6.74804	3.44578	242.495	191	308	138222	20.0952	3.44578	321.839	191	559	183448	84.4883	3.44578	0	px	Intensity	1.26517
Merged	113992	4456.48	3395.5	-3194.1	334	655	113.047	90	143	74046	6.40515	3.44578	239.992	189	296	157195	16.32	3.44578	311.858	189	569	204267	92.7753	3.44578	0	px	Intensity	1.26496
Merged	113992	4456.48	3395.5	-3194.1	353	567	111.473	92	141	63205	6.14202	3.44578	273.46	200	357	155052	29.936	3.44578	366.065	209	554	207559	77.7878	3.44578	0	px	Intensity	1.26488
Merged	113992	4456.48	3395.5	-3194.1	219	405	113.059	81	143	45789	6.97591	3.44578	270.738	203	336	109649	24.9916	3.44578	365.736	238	532	148123	65.2359	3.44578	0	px	Intensity	1.26482
Merged	113992	4456.48	3395.5	-3194.1	292	1345	117.044	97	148	157424	7.9313	3.44578	327.787	203	477	440874	52.7074	3.44578	354.356	195	688	476609	93.9814	3.44578	0	px	Intensity	1.26448
Merged	113992	4456.48	3395.5	-3194.1	218	885	113.936	95	144	100833	6.97588	3.44578	263.642	178	368	233323	31.4798	3.44578	307.231	167	519	271899	88.2572	3.44578	0	px	Intensity	1.26387
Merged	113992	4456.48	3395.5	-3194.1	447	786	121.243	90	153	95297	8.90302	3.44578	459.939	291	755	361512	97.7104	3.44578	371.427	217	540	291942	76.8153	3.44578	0	px	Intensity	1.26193
Merged	113992	4456.48	3395.5	-3194.1	85	274	109.372	96	138	29968	5.44604	3.44578	215.905	171	254	59158	14.1623	3.44578	481.511	348	568	131934	34.0958	3.44578	0	px	Intensity	1.26175
Merged	113992	4456.48	3395.5	-3194.1	421	578	114.223	77	144	66021	7.2763	3.44578	318.739	224	418	184231	35.0025	3.44578	290.348	170	545	167821	93.4445	3.44578	0	px	Intensity	1.26069
Merged	113992	4456.48	3395.5	-3194.1	149	366	111.97	91	141	40981	6.96508	3.44578	248.923	196	299	91106	21.1227	3.44578	352.708	234	538	129091	70.0002	3.44578	0	px	Intensity	1.25927
Merged	113992	4456.48	3395.5	-3194.1	321	117	110.402	99	139	12917	5.7827	3.44578	228.162	180	271	26695	16.0846	3.44578	424.274	290	549	49640	68.0378	3.44578	0	px	Intensity	1.25904
Merged	113992	4456.48	3395.5	-3194.1	357	556	110.439	81	139	61404	6.25062	3.44578	261.626	195	324	145464	22.3201	3.44578	333.673	161	531	185522	98.1416	3.44578	0	px	Intensity	1.25862
Merged	113992	4456.48	3395.5	-3194.1	187	451	116.803	83	147	52678	8.1859	3.44578	304.43	212	390	137298	37.8894	3.44578	299.06	173	528	134876	94.9913	3.44578	0	px	Intensity	1.25853
Merged	113992	4456.48	3395.5	-3194.1	34	329	116.805	88	147	38429	9.30218	3.44578	425.274	223	635	139915	97.4803	3.44578	372.705	244	572	122620	77.2299	3.44578	0	px	Intensity	1.2585
Merged	113992	4456.48	3395.5	-3194.1	217	716	114.469	92	144	81960	7.07571	3.44578	287.215	215	357	205646	28.3438	3.44578	334.712	219	557	239654	71.6252	3.44578	0	px	Intensity	1.25798
Merged	113992	4456.48	3395.5	-3194.1	216	562	111.306	75	140	62554	6.7293	3.44578	250.146	186	311	140582	21.8276	3.44578	374.504	246	576	210471	69.0097	3.44578	0	px	Intensity	1.25779
Merged	113992	4456.48	3395.5	-3194.1	381	386	113.01	96	142	43622	6.52169	3.44578	260.596	204	323	100590	19.9411	3.44578	346.503	218	541	133750	74.1337	3.44578	0	px	Intensity	1.25652
Merged	113992	4456.48	3395.5	-3194.1	386	687	108.278	93	136	74387	5.26707	3.44578	212.528	169	263	146007	16.0068	3.44578	328.766	170	555	225862	99.0891	3.44578	0	px	Intensity	1.25603
Merged	113992	4456.48	3395.5	-3194.1	268	570	113.9	91	143	64923	6.83859	3.44578	276.491	195	361	157600	32.7948	3.44578	375.554	241	553	214066	71.6291	3.44578	0	px	Intensity	1.25549
Merged	113992	4456.48	3395.5	-3194.1	376	841	116.31	92	146	97817	7.96854	3.44578	315.76	214	556	265554	75.8549	3.44578	311.955	175	548	262354	90.0644	3.44578	0	px	Intensity	1.25526
Merged	113992	4456.48	3395.5	-3194.1	202	529	109.992	88	138	58186	6.17071	3.44578	222.94	174	264	117935	15.7245	3.44578	362.31	215	559	191662	76.8316	3.44578	0	px	Intensity	1.25463
Merged	113992	4456.48	3395.5	-3194.1	143	374	120.492	87	151	45064	9.89137	3.44578	426.781	219	609	159616	93.2537	3.44578	366.543	240	536	137087	78.4512	3.44578	0	px	Intensity	1.2532
Merged	113992	4456.48	3395.5	-3194.1	267	412	110.286	95	138	45438	6.14524	3.44578	246.367	178	325	101503	19.6229	3.44578	293.5	162	534	120922	100.224	3.44578	0	px	Intensity	1.25129
Merged	113992	4456.48	3395.5	-3194.1	306	391	107.923	87	135	42198	4.905	3.44578	217.003	161	277	84848	15.5243	3.44578	493.235	409	582	192855	26.7643	3.44578	0	px	Intensity	1.25089
Merged	113992	4456.48	3395.5	-3194.1	156	413	111.927	86	140	46226	6.47306	3.44578	229.201	180	275	94660	15.7608	3.44578	322.138	214	544	133043	74.7046	3.44578	0	px	Intensity	1.25081
Merged	113992	4456.48	3395.5	-3194.1	25	412	109.57	90	137	45143	5.92697	3.44578	258.67	188	313	106572	25.8696	3.44578	318.133	184	517	131071	87.6839	3.44578	0	px	Intensity	1.25034
Merged	113992	4456.48	3395.5	-3194.1	364	600	110.393	96	138	66236	5.91904	3.44578	244.423	181	305	146654	23.0761	3.44578	369.893	229	538	221936	76.259	3.44578	0	px	Intensity	1.25008
Merged	113992	4456.48	3395.5	-3194.1	417	495	110.404	96	138	54650	5.6479	3.44578	231.416	186	281	114551	16.9353	3.44578	307.313	171	533	152120	101.043	3.44578	0	px	Intensity	1.24995
Merged	113992	4456.48	3395.5	-3194.1	200	451	112.071	92	140	50544	6.26631	3.44578	235.812	189	288	106351	16.3651	3.44578	313.494	191	537	141386	89.3951	3.44578	0	px	Intensity	1.24921
Merged	113992	4456.48	3395.5	-3194.1	315	1015	111.331	87	139	113001	6.25841	3.44578	266.75	192	366	270751	36.1116	3.44578	352.137	217	556	357419	76.0381	3.44578	0	px	Intensity	1.24853
Merged	113992	4456.48	3395.5	-3194.1	150	427	122.578	101	153	52341	8.59154	3.44578	384.56	234	510	164207	61.3989	3.44578	349.967	230	523	149436	70.7674	3.44578	0	px	Intensity	1.24818
Merged	113992	4456.48	3395.5	-3194.1	206	831	117.073	95	146	97288	8.28251	3.44578	341.125	220	528	283475	66.8208	3.44578	315.555	178	522	262226	75.5837	3.44578	0	px	Intensity	1.24708
Merged	113992	4456.48	3395.5	-3194.1	100	710	110.78	59	138	78654	6.84845	3.44578	233.344	177	291	165674	18.3788	3.44578	354.863	224	548	251953	73.6376	3.44578	0	px	Intensity	1.24571
Merged	113992	4456.48	3395.5	-3194.1	123	1089	113.216	92	141	123292	6.50657	3.44578	285.731	194	380	311161	34.7559	3.44578	321.951	184	519	350605	73.2756	3.44578	0	px	Intensity	1.24541
Merged	113992	4456.48	3395.5	-3194.1	308	961	110.027	88	137	105736	5.53135	3.44578	236.823	190	295	227587	15.73	3.44578	501.964	408	589	482387	27.0517	3.44578	0	px	Intensity	1.24515
Merged	113992	4456.48	3395.5	-3194.1	103	340	123.697	103	154	42057	9.60626	3.44578	465.247	272	698	158184	98.8967	3.44578	312.385	181	537	106211	91.4672	3.44578	0	px	Intensity	1.24498
Merged	113992	4456.48	3395.5	-3194.1	54	502	113.307	84	141	56880	7.45633	3.44578	293.149	187	422	147161	48.2066	3.44578	363.735	210	560	182595	80.2965	3.44578	0	px	Intensity	1.24441
Merged	113992	4456.48	3395.5	-3194.1	155	466	116.639	95	145	54354	8.48325	3.44578	355.054	200	522	165455	71.2832	3.44578	377.29	254	549	175817	68.604	3.44578	0	px	Intensity	1.24315
Merged	113992	4456.48	3395.5	-3194.1	233	175	110.354	97	137	19312	5.85996	3.44578	241.926	198	287	42337	16.3639	3.44578	463.6	380	589	81130	38.3807	3.44578	0	px	Intensity	1.24146
Merged	113992	4456.48	3395.5	-3194.1	220	252	110.361	91	137	27811	5.6084	3.44578	245.853	203	283	61955	16.4199	3.44578	408.571	275	535	102960	63.7091	3.44578	0	px	Intensity	1.24138
Merged	113992	4456.48	3395.5	-3194.1	282	751	115.298	97	143	86589	7.80393	3.44578	307.678	204	431	231066	45.1051	3.44578	363.093	234	575	272683	65.1764	3.44578	0	px	Intensity	1.24026
Merged	113992	4456.48	3395.5	-3194.1	66	422	116.938	93	145	49348	8.18129	3.44578	342.019	227	469	144332	50.7152	3.44578	309.874	178	528	130767	102.526	3.44578	0	px	Intensity	1.23997
Merged	113992	4456.48	3395.5	-3194.1	354	232	109.685	96	136	25447	5.28536	3.44578	227.203	187	285	52711	16.9896	3.44578	471.009	384	580	109274	35.3316	3.44578	0	px	Intensity	1.23991
Merged	113992	4456.48	3395.5	-3194.1	97	436	112.124	96	139	48886	6.64779	3.44578	278.789	216	362	121552	26.3256	3.44578	348.908	233	520	152124	68.771	3.44578	0	px	Intensity	1.2397
Merged	113992	4456.48	3395.5	-3194.1	207	560	112.971	93	140	63264	7.07651	3.44578	278.104	196	344	155738	26.4161	3.44578	306.029	180	529	171376	89.5075	3.44578	0	px	Intensity	1.23925
Merged	113992	4456.48	3395.5	-3194.1	454	1529	108.181	83	134	165409	4.92396	3.44578	219.627	161	282	335810	15.5485	3.44578	503.797	391	607	770306	28.4966	3.44578	0	px	Intensity	1.23866
Merged	113992	4456.48	3395.5	-3194.1	360	716	110.83	92	137	79354	5.89726	3.44578	225.652	184	282	161567	15.5496	3.44578	309.098	173	587	221314	95.5381	3.44578	0	px	Intensity	1.23613
Merged	113992	4456.48	3395.5	-3194.1	290	513	111.019	92	137	56953	5.81703	3.44578	264.955	197	348	135922	27.4206	3.44578	353.175	227	523	181179	68.5011	3.44578	0	px	Intensity	1.23402
Merged	113992	4456.48	3395.5	-3194.1	295	487	112.901	90	139	54983	6.74369	3.44578	247.891	188	313	120723	18.0199	3.44578	312.485	172	531	152180	90.9394	3.44578	0	px	Intensity	1.23116
Merged	113992	4456.48	3395.5	-3194.1	35	351	107.251	95	132	37645	5.01968	3.44578	206.627	163	267	72526	15.1037	3.44578	483.276	361	593	169630	37.6771	3.44578	0	px	Intensity	1.23076
Merged	113992	4456.48	3395.5	-3194.1	240	570	112.137	81	138	63918	6.50375	3.44578	251.258	203	306	143217	18.7155	3.44578	314.968	168	558	179532	99.7096	3.44578	0	px	Intensity	1.23064
Merged	113992	4456.48	3395.5	-3194.1	385	364	112.253	96	138	40860	6.51191	3.44578	228.033	185	285	83004	16.769	3.44578	398.547	250	537	145071	68.1075	3.44578	0	px	Intensity	1.22937
Merged	113992	4456.48	3395.5	-3194.1	363	305	109.007	88	134	33247	5.53904	3.44578	212.725	172	261	64881	14.284	3.44578	340.954	179	575	103991	102.091	3.44578	0	px	Intensity	1.22928
Merged	113992	4456.48	3395.5	-3194.1	92	959	113.936	93	140	109265	6.98866	3.44578	265.578	201	346	254689	29.3382	3.44578	330.64	196	600	317084	84.821	3.44578	0	px	Intensity	1.22876
Merged	113992	4456.48	3395.5	-3194.1	252	610	114.023	96	140	69554	7.16175	3.44578	252.215	186	323	153851	22.6197	3.44578	346.503	229	560	211367	73.3387	3.44578	0	px	Intensity	1.22782
Merged	113992	4456.48	3395.5	-3194.1	147	196	119.791	103	147	23479	8.80996	3.44578	312.531	225	387	61256	29.4483	3.44578	387.423	263	545	75935	71.0069	3.44578	0	px	Intensity	1.22714
Merged	113992	4456.48	3395.5	-3194.1	243	565	110.028	81	135	62166	5.67329	3.44578	229.692	185	293	129776	15.6809	3.44578	324.173	201	542	183158	80.2854	3.44578	0	px	Intensity	1.22696
Merged	113992	4456.48	3395.5	-3194.1	209	400	119.028	88	146	47611	8.81401	3.44578	355.277	233	466	142111	57.5756	3.44578	322.627	218	518	129051	78.2965	3.44578	0	px	Intensity	1.22661
Merged	113992	4456.48	3395.5	-3194.1	58	792	113.371	79	139	89790	7.02533	3.44578	292.707	206	415	231824	37.6291	3.44578	328.194	222	559	259930	68.1744	3.44578	0	px	Intensity	1.22606
Merged	113992	4456.48	3395.5	-3194.1	179	834	113.41	96	139	94584	6.74693	3.44578	242.235	189	303	202024	17.0816	3.44578	315.914	183	529	263472	77.3131	3.44578	0	px	Intensity	1.22564
Merged	113992	4456.48	3395.5	-3194.1	296	600	114.305	97	140	68583	6.99606	3.44578	244.257	203	292	146554	16.5846	3.44578	299.74	164	520	179844	89.4032	3.44578	0	px	Intensity	1.22479
Merged	113992	4456.48	3395.5	-3194.1	78	597	111.918	90	137	66815	6.93643	3.44578	249.598	175	315	149010	24.9183	3.44578	359.789	243	551	214794	68.068	3.44578	0	px	Intensity	1.22411
Merged	113992	4456.48	3395.5	-3194.1	340	446	117.666	93	144	52479	8.33565	3.44578	390.626	240	554	174219	80.0184	3.44578	304.661	181	518	135879	87.8609	3.44578	0	px	Intensity	1.2238
Merged	113992	4456.48	3395.5	-3194.1	440	378	108.831	90	133	41138	4.87619	3.44578	219.225	173	267	82867	15.5528	3.44578	491.944	353	599	185955	38.9751	3.44578	0	px	Intensity	1.22208
Merged	113992	4456.48	3395.5	-3194.1	62	803	109.695	95	134	88085	5.43036	3.44578	227.884	169	279	182991	15.9661	3.44578	501.802	413	586	402947	26.3098	3.44578	0	px	Intensity	1.22157
Merged	113992	4456.48	3395.5	-3194.1	142	488	111.4	95	136	54363	6.04127	3.44578	237.957	198	290	116123	17.323	3.44578	338.467	223	519	165172	70.6507	3.44578	0	px	Intensity	1.22083
Merged	113992	4456.48	3395.5	-3194.1	118	479	111.53	80	136	53423	6.34651	3.44578	231.217	184	281	110753	17.1319	3.44578	354.564	247	529	169836	63.8589	3.44578	0	px	Intensity	1.2194
Merged	113992	4456.48	3395.5	-3194.1	445	450	111.604	66	136	50222	7.19766	3.44578	242.278	137	306	109025	23.1414	3.44578	367.827	248	561	165522	71.3977	3.44578	0	px	Intensity	1.21859
Merged	113992	4456.48	3395.5	-3194.1	161	517	113.255	99	138	58553	6.84193	3.44578	259.988	197	329	134414	22.4934	3.44578	319.59	186	553	165228	92.893	3.44578	0	px	Intensity	1.21849
Merged	113992	4456.48	3395.5	-3194.1	56	142	109.183	96	133	15504	5.66312	3.44578	216.246	183	259	30707	14.2084	3.44578	396.43	240	532	56293	81.2579	3.44578	0	px	Intensity	1.21814
Merged	113992	4456.48	3395.5	-3194.1	343	289	116.713	97	142	33730	7.6721	3.44578	326.495	215	431	94357	54.0828	3.44578	324.889	213	517	93893	77.1178	3.44578	0	px	Intensity	1.21666
Merged	113992	4456.48	3395.5	-3194.1	434	283	114.42	91	139	32381	7.25816	3.44578	312.286	229	387	88377	27.2967	3.44578	349.534	217	553	98918	82.0259	3.44578	0	px	Intensity	1.21482
Merged	113992	4456.48	3395.5	-3194.1	67	360	116.981	95	142	42113	8.18314	3.44578	264.314	199	329	95153	25.8338	3.44578	355.617	230	547	128022	72.1307	3.44578	0	px	Intensity	1.21388
Merged	113992	4456.48	3395.5	-3194.1	132	598	112.865	98	137	67493	6.44406	3.44578	266.017	203	334	159078	23.389	3.44578	314.818	198	519	188261	81.0582	3.44578	0	px	Intensity	1.21384
Merged	113992	4456.48	3395.5	-3194.1	188	392	115.365	86	140	45223	7.77628	3.44578	282.003	211	364	110545	28.4379	3.44578	324.531	190	527	127216	86.4981	3.44578	0	px	Intensity	1.21354
Merged	113992	4456.48	3395.5	-3194.1	177	500	113.996	97	138	56998	6.74099	3.44578	292.372	205	368	146186	31.7844	3.44578	332.21	212	545	166105	72.415	3.44578	0	px	Intensity	1.21057
Merged	113992	4456.48	3395.5	-3194.1	88	888	111.611	83	135	99111	6.17957	3.44578	241.55	180	323	214496	21.6055	3.44578	349.394	222	588	310262	64.7226	3.44578	0	px	Intensity	1.20955
Merged	113992	4456.48	3395.5	-3194.1	140	410	137.437	100	166	56349	10.4747	3.44578	609.166	410	790	249758	79.629	3.44578	424.307	245	557	173966	64.3884	3.44578	0	px	Intensity	1.20783
Merged	113992	4456.48	3395.5	-3194.1	481	331	112.683	98	136	37298	6.91222	3.44578	294.686	191	388	97541	36.7624	3.44578	301.595	162	521	99828	97.5034	3.44578	0	px	Intensity	1.20693
Merged	113992	4456.48	3395.5	-3194.1	388	410	114.559	98	138	46969	6.82975	3.44578	260.541	202	326	106822	23.0077	3.44578	295.102	179	531	120992	91.0329	3.44578	0	px	Intensity	1.20462
Merged	113992	4456.48	3395.5	-3194.1	131	526	113.095	92	136	59488	6.97752	3.44578	231.736	189	276	121893	16.5228	3.44578	313.198	166	527	164742	99.1226	3.44578	0	px	Intensity	1.20253
Merged	113992	4456.48	3395.5	-3194.1	108	447	112.318	95	135	50206	6.50715	3.44578	292.676	205	374	130826	32.4376	3.44578	297.407	169	519	132941	96.046	3.44578	0	px	Intensity	1.20195
Merged	113992	4456.48	3395.5	-3194.1	172	267	109.828	94	132	29324	5.41683	3.44578	224.187	176	275	59858	15.5464	3.44578	342.805	188	550	91529	93.3986	3.44578	0	px	Intensity	1.20188
Merged	113992	4456.48	3395.5	-3194.1	317	418	117.392	99	141	49070	7.53712	3.44578	251.565	203	313	105154	18.1762	3.44578	307.443	175	548	128511	96.9923	3.44578	0	px	Intensity	1.2011
Merged	113992	4456.48	3395.5	-3194.1	23	625	108.282	89	130	67676	5.22107	3.44578	205.331	165	257	128332	14.6227	3.44578	314.4	170	535	196500	100.255	3.44578	0	px	Intensity	1.20057
Merged	113992	4456.48	3395.5	-3194.1	459	872	108.347	89	130	94479	5.17778	3.44578	220.372	176	264	192164	15.2008	3.44578	507.05	435	594	442148	27.3893	3.44578	0	px	Intensity	1.19984
Merged	113992	4456.48	3395.5	-3194.1	234	453	120.954	98	145	54792	8.9575	3.44578	447	290	638	202491	72.4888	3.44578	300.364	170	547	136065	99.5967	3.44578	0	px	Intensity	1.19881
Merged	113992	4456.48	3395.5	-3194.1	348	565	110.126	92	132	62221	5.59936	3.44578	226.791	183	285	128137	15.6274	3.44578	389.97	260	560	220333	66.5539	3.44578	0	px	Intensity	1.19863
Merged	113992	4456.48	3395.5	-3194.1	314	500	109.362	93	131	54681	5.137	3.44578	229.236	189	282	114618	16.3751	3.44578	505.08	425	590	252540	27.6869	3.44578	0	px	Intensity	1.19786
Merged	113992	4456.48	3395.5	-3194.1	198	384	108.747	87	130	41759	5.61679	3.44578	231.008	187	296	88707	18.325	3.44578	329.576	168	544	126557	102.985	3.44578	0	px	Intensity	1.19543
Merged	113992	4456.48	3395.5	-3194.1	239	167	111.263	95	133	18581	5.97434	3.44578	243.192	180	295	40613	18.9995	3.44578	467.066	353	572	78000	43.6339	3.44578	0	px	Intensity	1.19536
Merged	113992	4456.48	3395.5	-3194.1	228	372	118.097	94	141	43932	7.84572	3.44578	321.772	202	416	119699	42.4504	3.44578	343.489	220	527	127778	62.6305	3.44578	0	px	Intensity	1.19394
Merged	113992	4456.48	3395.5	-3194.1	261	422	108.986	94	130	45992	5.38472	3.44578	230.329	183	279	97199	16.6564	3.44578	335.201	174	557	141455	103.854	3.44578	0	px	Intensity	1.19282
Merged	113992	4456.48	3395.5	-3194.1	57	602	110.056	77	131	66254	5.59757	3.44578	221.038	169	275	133065	16.5	3.44578	307.689	167	520	185229	95.5726	3.44578	0	px	Intensity	1.1903
Merged	113992	4456.48	3395.5	-3194.1	166	341	111.76	99	133	38110	5.96189	3.44578	241.874	192	304	82479	18.469	3.44578	362.578	238	549	123639	86.7755	3.44578	0	px	Intensity	1.19006
Merged	113992	4456.48	3395.5	-3194.1	380	195	108.6	97	129	21177	4.97364	3.44578	216.713	176	256	42259	15.8701	3.44578	489.226	378	577	95399	32.5413	3.44578	0	px	Intensity	1.18785
Merged	113992	4456.48	3395.5	-3194.1	358	218	109.633	94	130	23900	5.21209	3.44578	227.835	182	274	49668	18.3171	3.44578	482.899	393	560	105272	29.818	3.44578	0	px	Intensity	1.18577
Merged	113992	4456.48	3395.5	-3194.1	444	446	110.556	90	131	49308	5.70137	3.44578	216.691	180	272	96644	14.9301	3.44578	295.058	164	530	131596	104.337	3.44578	0	px	Intensity	1.18492
Merged	113992	4456.48	3395.5	-3194.1	189	387	115.031	92	136	44517	7.289	3.44578	340.313	224	510	131701	60.2396	3.44578	322.587	222	519	124841	68.8149	3.44578	0	px	Intensity	1.18229
Merged	113992	4456.48	3395.5	-3194.1	193	683	111.753	88	132	76327	6.15763	3.44578	250.878	181	342	171350	21.9808	3.44578	358.505	239	557	244859	67.3075	3.44578	0	px	Intensity	1.18118
Merged	113992	4456.48	3395.5	-3194.1	449	933	107.574	96	127	100367	4.89021	3.44578	196.555	152	244	183386	13.5961	3.44578	314.454	166	567	293386	96.4927	3.44578	0	px	Intensity	1.18058
Merged	113992	4456.48	3395.5	-3194.1	162	215	110.247	99	130	23703	5.17768	3.44578	234.647	187	297	50449	16.9212	3.44578	460.614	365	571	99032	40.7344	3.44578	0	px	Intensity	1.17918
Merged	113992	4456.48	3395.5	-3194.1	242	360	111.981	98	132	40313	6.26882	3.44578	259.55	180	332	93438	28.0188	3.44578	360.442	231	538	129759	71.4959	3.44578	0	px	Intensity	1.17878
Merged	113992	4456.48	3395.5	-3194.1	378	159	106.906	95	126	16998	4.96953	3.44578	207.403	170	240	32977	15.0487	3.44578	505.799	443	568	80422	23.2508	3.44578	0	px	Intensity	1.17861
Merged	113992	4456.48	3395.5	-3194.1	275	269	111.186	80	131	29909	6.43944	3.44578	253.569	208	302	68210	17.9941	3.44578	479.803	351	568	129067	40.0452	3.44578	0	px	Intensity	1.17821
Merged	113992	4456.48	3395.5	-3194.1	439	292	117.976	91	139	34449	7.88491	3.44578	333.524	252	425	97389	28.6347	3.44578	424.901	326	564	124071	45.4425	3.44578	0	px	Intensity	1.17821
Merged	113992	4456.48	3395.5	-3194.1	164	286	112.171	93	132	32081	6.63986	3.44578	240.462	183	299	68772	18.83	3.44578	312.857	169	563	89477	101.779	3.44578	0	px	Intensity	1.17677
Merged	113992	4456.48	3395.5	-3194.1	196	429	115.678	99	136	49626	7.24601	3.44578	257.625	198	306	110521	18.8884	3.44578	320.056	200	524	137304	78.86	3.44578	0	px	Intensity	1.17567
Merged	113992	4456.48	3395.5	-3194.1	403	201	108.204	98	127	21749	4.65564	3.44578	224.597	185	279	45144	16.8535	3.44578	471.677	385	565	94807	36.5513	3.44578	0	px	Intensity	1.17371
Merged	113992	4456.48	3395.5	-3194.1	416	221	123.561	105	145	27307	8.60681	3.44578	432.063	290	555	95486	64.8252	3.44578	345.543	223	537	76365	74.5049	3.44578	0	px	Intensity	1.17351
Merged	113992	4456.48	3395.5	-3194.1	72	143	108.503	98	127	15516	4.95899	3.44578	224.063	189	260	32041	14.2505	3.44578	509.168	454	574	72811	25.5612	3.44578	0	px	Intensity	1.17047
Merged	113992	4456.48	3395.5	-3194.1	48	434	111.991	92	131	48604	6.20158	3.44578	252.479	195	323	109576	24.8799	3.44578	305.643	176	519	132649	97.612	3.44578	0	px	Intensity	1.16974
Merged	113992	4456.48	3395.5	-3194.1	81	320	116.272	102	136	37207	6.896	3.44578	299.969	228	394	95990	32.5254	3.44578	336.259	221	518	107603	77.3082	3.44578	0	px	Intensity	1.16967
Merged	113992	4456.48	3395.5	-3194.1	285	378	108.664	85	127	41075	4.92302	3.44578	218.669	176	266	82657	14.6458	3.44578	495.545	413	580	187316	27.006	3.44578	0	px	Intensity	1.16874
Merged	113992	4456.48	3395.5	-3194.1	254	282	107.887	97	126	30424	4.59033	3.44578	220.181	178	275	62091	16.0554	3.44578	423.443	296	556	119411	58.6585	3.44578	0	px	Intensity	1.16789
Merged	113992	4456.48	3395.5	-3194.1	43	226	107.942	98	126	24395	4.81618	3.44578	207.553	170	256	46907	14.5872	3.44578	480.947	405	596	108694	34.2634	3.44578	0	px	Intensity	1.16729
Merged	113992	4456.48	3395.5	-3194.1	470	127	108	99	126	13716	5.2114	3.44578	217.268	170	245	27593	14.6977	3.44578	500.472	437	573	63560	23.2606	3.44578	0	px	Intensity	1.16667
Merged	113992	4456.48	3395.5	-3194.1	95	466	108.863	84	127	50730	5.28906	3.44578	226.869	180	303	105721	18.342	3.44578	455.457	321	593	212243	49.871	3.44578	0	px	Intensity	1.16661
Merged	113992	4456.48	3395.5	-3194.1	450	1047	108.074	91	126	113153	4.83603	3.44578	217.695	177	268	227927	15.2177	3.44578	505.666	415	590	529432	27.8099	3.44578	0	px	Intensity	1.16587
Merged	113992	4456.48	3395.5	-3194.1	329	182	108.302	93	126	19711	5.22055	3.44578	228.341	188	274	41558	16.9533	3.44578	469.203	381	552	85395	38.0628	3.44578	0	px	Intensity	1.16341
Merged	113992	4456.48	3395.5	-3194.1	215	204	109.377	94	127	22313	5.2198	3.44578	222.745	178	274	45440	14.5528	3.44578	437.441	293	561	89238	64.8827	3.44578	0	px	Intensity	1.16112
Merged	113992	4456.48	3395.5	-3194.1	335	235	109.391	97	127	25707	4.85825	3.44578	227.043	189	270	53355	16.0551	3.44578	501.009	427	585	117737	24.7156	3.44578	0	px	Intensity	1.16097
Merged	113992	4456.48	3395.5	-3194.1	394	328	110.29	87	128	36175	5.69886	3.44578	229.159	173	281	75164	16.6756	3.44578	335.735	234	516	110121	72.2913	3.44578	0	px	Intensity	1.16058
Merged	113992	4456.48	3395.5	-3194.1	408	227	108.612	96	126	24655	4.67955	3.44578	222.436	182	264	50493	15.3264	3.44578	476.903	401	564	108257	31.0206	3.44578	0	px	Intensity	1.16009
Merged	113992	4456.48	3395.5	-3194.1	448	542	106.911	96	124	57946	4.42017	3.44578	196.061	157	234	106265	13.6911	3.44578	439.959	263	595	238458	68.3062	3.44578	0	px	Intensity	1.15984
Merged	113992	4456.48	3395.5	-3194.1	61	327	110.566	96	128	36155	5.662	3.44578	235.801	190	282	77107	15.9824	3.44578	505.813	428	570	165401	25.5815	3.44578	0	px	Intensity	1.15768
Merged	113992	4456.48	3395.5	-3194.1	274	415	112.434	93	130	46660	6.25678	3.44578	264.598	199	320	109808	20.4685	3.44578	310.636	188	540	128914	82.0571	3.44578	0	px	Intensity	1.15624
Merged	113992	4456.48	3395.5	-3194.1	80	170	108.976	97	126	18526	4.75992	3.44578	231.059	188	279	39280	17.5064	3.44578	481.394	399	596	81837	33.6398	3.44578	0	px	Intensity	1.15621
Merged	113992	4456.48	3395.5	-3194.1	65	619	107.27	90	124	66400	4.82728	3.44578	205.985	169	252	127505	14.8958	3.44578	504.454	434	586	312257	23.9182	3.44578	0	px	Intensity	1.15596
Merged	113992	4456.48	3395.5	-3194.1	322	367	109.924	98	127	40342	5.00137	3.44578	225.316	188	275	82691	15.0725	3.44578	498.529	401	577	182960	27.2607	3.44578	0	px	Intensity	1.15535
Merged	113992	4456.48	3395.5	-3194.1	352	276	110.116	96	127	30392	5.54223	3.44578	223.246	185	282	61616	17.541	3.44578	393.478	247	572	108600	64.5001	3.44578	0	px	Intensity	1.15333
Merged	113992	4456.48	3395.5	-3194.1	269	273	108.502	95	125	29621	4.8161	3.44578	218.817	177	269	59737	15.2888	3.44578	436.355	276	558	119125	52.2134	3.44578	0	px	Intensity	1.15205
Merged	113992	4456.48	3395.5	-3194.1	472	641	107.713	93	124	69044	4.90297	3.44578	211.574	169	259	135619	15.0503	3.44578	505.41	421	604	323968	27.7722	3.44578	0	px	Intensity	1.15121
Merged	113992	4456.48	3395.5	-3194.1	83	185	108.676	99	125	20105	4.68172	3.44578	221.373	182	268	40954	15.2508	3.44578	482.032	382	570	89176	36.4385	3.44578	0	px	Intensity	1.15021
Merged	113992	4456.48	3395.5	-3194.1	342	306	109.556	98	126	33524	5.16324	3.44578	240.422	155	397	73569	31.8106	3.44578	418.464	302	556	128050	55.7588	3.44578	0	px	Intensity	1.1501
Merged	113992	4456.48	3395.5	-3194.1	443	196	109.862	87	126	21533	5.3742	3.44578	223.362	185	267	43779	15.9676	3.44578	506.847	438	583	99342	25.8767	3.44578	0	px	Intensity	1.14689
Merged	113992	4456.48	3395.5	-3194.1	126	158	110.987	97	127	17536	5.55173	3.44578	244.019	193	302	38555	17.9929	3.44578	439.975	271	536	69516	58.5823	3.44578	0	px	Intensity	1.14427
Merged	113992	4456.48	3395.5	-3194.1	355	388	107.575	90	123	41739	4.67331	3.44578	210.928	165	259	81840	14.5989	3.44578	468.209	360	564	181665	39.2901	3.44578	0	px	Intensity	1.14339
Merged	113992	4456.48	3395.5	-3194.1	182	179	109.324	94	125	19569	5.51403	3.44578	231.039	188	289	41356	16.6423	3.44578	478.369	365	574	85628	37.3638	3.44578	0	px	Intensity	1.14339
Merged	113992	4456.48	3395.5	-3194.1	31	252	107.603	92	123	27116	4.94632	3.44578	214.758	177	257	54119	15.3133	3.44578	467.012	365	567	117687	39.9248	3.44578	0	px	Intensity	1.14309
Merged	113992	4456.48	3395.5	-3194.1	477	424	107.646	78	123	45642	5.28592	3.44578	210.597	174	255	89293	14.8653	3.44578	507.823	438	597	215317	25.6236	3.44578	0	px	Intensity	1.14263
Merged	113992	4456.48	3395.5	-3194.1	222	210	109.571	93	125	23010	5.16336	3.44578	226.619	186	269	47590	15.3094	3.44578	480.338	389	559	100871	34.0229	3.44578	0	px	Intensity	1.14081
Merged	113992	4456.48	3395.5	-3194.1	369	460	107.178	94	122	49302	4.84217	3.44578	210.115	170	262	96653	14.544	3.44578	496.193	385	587	228249	29.5803	3.44578	0	px	Intensity	1.13829
Merged	113992	4456.48	3395.5	-3194.1	60	187	108.952	96	124	20374	5.45707	3.44578	210.396	179	245	39344	13.697	3.44578	415.845	271	552	77763	68.9935	3.44578	0	px	Intensity	1.13812
Merged	113992	4456.48	3395.5	-3194.1	305	236	108.11	73	123	25514	5.89266	3.44578	226.78	180	286	53520	17.9591	3.44578	478.602	389	588	112950	37.1818	3.44578	0	px	Intensity	1.13773
Merged	113992	4456.48	3395.5	-3194.1	346	175	109.211	98	124	19112	5.47513	3.44578	218.029	177	260	38155	15.3458	3.44578	452.263	355	608	79146	47.6834	3.44578	0	px	Intensity	1.13541
Merged	113992	4456.48	3395.5	-3194.1	401	204	108.426	97	123	22119	5.18049	3.44578	227.265	185	271	46362	15.8796	3.44578	487.525	379	569	99455	35.7091	3.44578	0	px	Intensity	1.13441
Merged	113992	4456.48	3395.5	-3194.1	284	269	109.517	94	124	29460	5.00448	3.44578	233.249	182	278	62744	16.2431	3.44578	416.829	286	545	112127	60.9835	3.44578	0	px	Intensity	1.13225
Merged	113992	4456.48	3395.5	-3194.1	42	377	109.687	93	124	41352	5.41913	3.44578	228.35	181	292	86088	17.7186	3.44578	463.271	312	566	174653	50.6553	3.44578	0	px	Intensity	1.13049
Merged	113992	4456.48	3395.5	-3194.1	310	95	108.926	100	123	10348	4.65513	3.44578	232.032	183	268	22043	15.4926	3.44578	510.653	460	574	48512	21.0574	3.44578	0	px	Intensity	1.1292
Merged	113992	4456.48	3395.5	-3194.1	246	189	109.101	93	123	20620	5.26328	3.44578	234	193	269	44226	16.4142	3.44578	475.286	399	570	89829	31.8899	3.44578	0	px	Intensity	1.1274
Merged	113992	4456.48	3395.5	-3194.1	460	756	105.787	92	119	79975	4.52894	3.44578	190.839	152	246	144274	13.7252	3.44578	308.049	166	558	232885	104.998	3.44578	0	px	Intensity	1.1249
Merged	113992	4456.48	3395.5	-3194.1	186	168	109.5	97	123	18396	4.93066	3.44578	220.339	185	260	37017	15.1361	3.44578	417.351	266	543	70115	72.0686	3.44578	0	px	Intensity	1.12329
Merged	113992	4456.48	3395.5	-3194.1	71	172	107.378	96	120	18469	4.89599	3.44578	200.808	167	251	34539	13.8781	3.44578	473.878	375	591	81507	37.2507	3.44578	0	px	Intensity	1.11755
Merged	113992	4456.48	3395.5	-3194.1	326	233	108.498	97	121	25280	4.75385	3.44578	221.305	170	277	51564	16.6979	3.44578	480.485	377	569	111953	35.6533	3.44578	0	px	Intensity	1.11523
Merged	113992	4456.48	3395.5	-3194.1	169	198	110.606	99	123	21900	5.1643	3.44578	233.914	185	280	46315	16.8713	3.44578	458.934	364	559	90869	44.8068	3.44578	0	px	Intensity	1.11205
Merged	113992	4456.48	3395.5	-3194.1	273	106	110.019	98	122	11662	4.70562	3.44578	245.717	205	292	26046	17.452	3.44578	466.67	342	562	49467	45.5135	3.44578	0	px	Intensity	1.1089
Merged	113992	4456.48	3395.5	-3194.1	475	148	107.459	97	119	15904	4.18045	3.44578	209.088	173	254	30945	15.7698	3.44578	480.574	412	557	71125	29.4614	3.44578	0	px	Intensity	1.10739
Merged	113992	4456.48	3395.5	-3194.1	184	179	107.497	94	119	19242	4.57767	3.44578	219.034	179	275	39207	15.6232	3.44578	439.363	324	545	78646	53.6236	3.44578	0	px	Intensity	1.10701
Merged	113992	4456.48	3395.5	-3194.1	463	158	107.576	97	119	16997	4.47996	3.44578	203.956	164	240	32225	13.8451	3.44578	483.411	405	554	76379	28.2965	3.44578	0	px	Intensity	1.1062
Merged	113992	4456.48	3395.5	-3194.1	70	193	106.684	96	118	20590	4.48493	3.44578	205.886	170	239	39736	14.8671	3.44578	504.99	430	574	97463	23.126	3.44578	0	px	Intensity	1.10607
Merged	113992	4456.48	3395.5	-3194.1	133	165	107.055	97	118	17664	4.42071	3.44578	202.824	171	239	33466	13.6505	3.44578	449.479	332	547	74164	50.6002	3.44578	0	px	Intensity	1.10224
Merged	113992	4456.48	3395.5	-3194.1	121	329	106.216	95	117	34945	4.24839	3.44578	207.587	167	273	68296	14.6891	3.44578	495.562	409	580	163040	28.0572	3.44578	0	px	Intensity	1.10153
Merged	113992	4456.48	3395.5	-3194.1	45	197	107.213	88	118	21121	4.59258	3.44578	203.797	173	251	40148	13.1704	3.44578	452.812	353	598	89204	49.2059	3.44578	0	px	Intensity	1.10061
Merged	113992	4456.48	3395.5	-3194.1	22	264	106.436	97	117	28099	4.21296	3.44578	199.64	155	236	52705	14.2359	3.44578	510.254	432	587	134707	27.6475	3.44578	0	px	Intensity	1.09926
Merged	113992	4456.48	3395.5	-3194.1	119	159	107.415	98	118	17079	3.87543	3.44578	201.503	161	246	32039	15.2614	3.44578	446.176	348	603	70942	48.5726	3.44578	0	px	Intensity	1.09854
Merged	113992	4456.48	3395.5	-3194.1	371	170	106.835	91	117	18162	4.40414	3.44578	208.847	175	246	35504	15.1343	3.44578	446.676	309	529	75935	56.8188	3.44578	0	px	Intensity	1.09514

## Sheet: E253A-1
FileName	Time (ms)	Z Pos	X Pos	Y Pos	ROI ID	ROI Area	ROI Mean Intensity(Red)	ROI Min Intensity(Red)	ROI Max Intensity(Red)	ROI Sum Intensity(Red)	ROI StDev Intensity(Red)	ROI Signal/Background(Red)	Binary Area(Red)	Binary Mean Intensity(Red)	Binary Min Intensity(Red)	Binary Max Intensity(Red)	Binary Sum Intensity(Red)	Binary StDev Intensity(Red)	Binary Signal/Background(Red)	ROI Mean Intensity(Blue)	ROI Min Intensity(Blue)	ROI Max Intensity(Blue)	ROI Sum Intensity(Blue)	ROI StDev Intensity(Blue)	ROI Signal/Background(Blue)	Binary Area(Blue)	Binary Mean Intensity(Blue)	Binary Min Intensity(Blue)	Binary Max Intensity(Blue)	Binary Sum Intensity(Blue)	Binary StDev Intensity(Blue)	Binary Signal/Background(Blue)	ROI Mean Intensity(Mono)	ROI Min Intensity(Mono)	ROI Max Intensity(Mono)	ROI Sum Intensity(Mono)	ROI StDev Intensity(Mono)	ROI Signal/Background(Mono)	Binary Area(Mono)	Binary Mean Intensity(Mono)	Binary Min Intensity(Mono)	Binary Max Intensity(Mono)	Binary Sum Intensity(Mono)	Binary StDev Intensity(Mono)	Binary Signal/Background(Mono)	Area Fraction	Unit	Channel	Red ratio
Merged	6851.95	4517.68	-5635	-5767.1	518	1165	123.581	94	418	143972	28.2632	2.70552	1165	123.581	94	418	143972	28.2632	2.72222	255.233	195	333	297347	21.5984	2.70552	1165	255.233	195	333	297347	21.5984	2.72222	334.603	192	581	389812	78.6551	2.70552	1165	334.603	192	581	389812	78.6551	2.72222	1	px	Intensity	3.38239
Merged	6851.95	4517.68	-5635	-5767.1	524	304	123.036	98	387	37403	36.8032	2.70552	304	123.036	98	387	37403	36.8032	2.72222	252.234	195	315	76679	23.1256	2.70552	304	252.234	195	315	76679	23.1256	2.72222	303.53	185	543	92273	89.2677	2.70552	304	303.53	185	543	92273	89.2677	2.72222	1	px	Intensity	3.14542
Merged	6851.95	4517.68	-5635	-5767.1	117	1277	116.384	92	330	148623	18.8083	2.70552	1277	116.384	92	330	148623	18.8083	2.72222	232.791	166	316	297274	26.8438	2.70552	1277	232.791	166	316	297274	26.8438	2.72222	367.607	217	566	469434	69.1444	2.70552	1277	367.607	217	566	469434	69.1444	2.72222	1	px	Intensity	2.83543
Merged	6851.95	4517.68	-5635	-5767.1	278	204	142.471	98	391	29064	51.9391	2.70552	204	142.471	98	391	29064	51.9391	2.72222	267.26	211	331	54521	23.2074	2.70552	204	267.26	211	331	54521	23.2074	2.72222	331.137	204	522	67552	89.5961	2.70552	204	331.137	204	522	67552	89.5961	2.72222	1	px	Intensity	2.74443
Merged	6851.95	4517.68	-5635	-5767.1	480	1530	114.678	84	300	175458	14.3799	2.70552	1530	114.678	84	300	175458	14.3799	2.72222	231.349	182	320	353964	21.8883	2.70552	1530	231.349	182	320	353964	21.8883	2.72222	350.913	199	874	536897	105.775	2.70552	1530	350.913	199	874	536897	105.775	2.72222	1	px	Intensity	2.61601
Merged	6851.95	4517.68	-5635	-5767.1	440	496	119.067	85	311	59057	25.2788	2.70552	496	119.067	85	311	59057	25.2788	2.72222	259.944	192	343	128932	27.4141	2.70552	496	259.944	192	343	128932	27.4141	2.72222	329.371	202	524	163368	82.6793	2.70552	496	329.371	202	524	163368	82.6793	2.72222	1	px	Intensity	2.61199
Merged	6851.95	4517.68	-5635	-5767.1	543	3095	115.733	74	301	358194	15.3922	2.70552	3095	115.733	74	301	358194	15.3922	2.72222	228.78	170	329	708075	20.9061	2.70552	3095	228.78	170	329	708075	20.9061	2.72222	386.368	204	1258	1195810	125.432	2.70552	3095	386.368	204	1258	1195810	125.432	2.72222	1	px	Intensity	2.60081
Merged	6851.95	4517.68	-5635	-5767.1	549	320	122.166	93	314	39093	30.3318	2.70552	320	122.166	93	314	39093	30.3318	2.72222	239.113	185	293	76516	21.9974	2.70552	320	239.113	185	293	76516	21.9974	2.72222	375.125	230	556	120040	75.0663	2.70552	320	375.125	230	556	120040	75.0663	2.72222	1	px	Intensity	2.57028
Merged	6851.95	4517.68	-5635	-5767.1	350	443	121.293	99	311	53733	25.8541	2.70552	443	121.293	99	311	53733	25.8541	2.72222	259.871	182	331	115123	26.9483	2.70552	443	259.871	182	331	115123	26.9483	2.72222	325.986	215	578	144412	80.6172	2.70552	443	325.986	215	578	144412	80.6172	2.72222	1	px	Intensity	2.56403
Merged	6851.95	4517.68	-5635	-5767.1	14	1108	116.014	87	297	128543	16.1397	2.70552	1108	116.014	87	297	128543	16.1397	2.72222	231.109	176	287	256069	17.5419	2.70552	1108	231.109	176	287	256069	17.5419	2.72222	404.618	200	994	448317	121.49	2.70552	1108	404.618	200	994	448317	121.49	2.72222	1	px	Intensity	2.56005
Merged	6851.95	4517.68	-5635	-5767.1	136	513	118.366	86	290	60722	23.3593	2.70552	513	118.366	86	290	60722	23.3593	2.72222	236.037	185	295	121087	20.2794	2.70552	513	236.037	185	295	121087	20.2794	2.72222	333.52	214	545	171096	79.8368	2.70552	513	333.52	214	545	171096	79.8368	2.72222	1	px	Intensity	2.45002
Merged	6851.95	4517.68	-5635	-5767.1	352	2372	120.244	88	287	285219	15.6967	2.70552	2372	120.244	88	287	285219	15.6967	2.72222	242.806	181	332	575935	20.5835	2.70552	2372	242.806	181	332	575935	20.5835	2.72222	396.247	211	1129	939899	133.541	2.70552	2372	396.247	211	1129	939899	133.541	2.72222	1	px	Intensity	2.38681
Merged	6851.95	4517.68	-5635	-5767.1	525	883	117.444	92	278	103703	17.4016	2.70552	883	117.444	92	278	103703	17.4016	2.72222	235.04	170	288	207540	18.5698	2.70552	883	235.04	170	288	207540	18.5698	2.72222	371.108	259	534	327688	60.5862	2.70552	883	371.108	259	534	327688	60.5862	2.72222	1	px	Intensity	2.36709
Merged	6851.95	4517.68	-5635	-5767.1	408	2394	116.948	95	275	279974	13.2281	2.70552	2394	116.948	95	275	279974	13.2281	2.72222	239.545	177	317	573471	20.1791	2.70552	2394	239.545	177	317	573471	20.1791	2.72222	387.358	181	1147	927334	147.862	2.70552	2394	387.358	181	1147	927334	147.862	2.72222	1	px	Intensity	2.35147
Merged	6851.95	4517.68	-5635	-5767.1	219	451	121.095	97	284	54614	24.5227	2.70552	451	121.095	97	284	54614	24.5227	2.72222	260.925	190	325	117677	24.6953	2.70552	451	260.925	190	325	117677	24.6953	2.72222	306.976	189	536	138446	89.0188	2.70552	451	306.976	189	536	138446	89.0188	2.72222	1	px	Intensity	2.34526
Merged	6851.95	4517.68	-5635	-5767.1	551	297	121.764	98	283	36164	30.4169	2.70552	297	121.764	98	283	36164	30.4169	2.72222	249.822	193	321	74197	25.2165	2.70552	297	249.822	193	321	74197	25.2165	2.72222	299.394	179	538	88920	92.047	2.70552	297	299.394	179	538	88920	92.047	2.72222	1	px	Intensity	2.32416
Merged	6851.95	4517.68	-5635	-5767.1	364	1456	114.945	92	267	167360	13.4955	2.70552	1456	114.945	92	267	167360	13.4955	2.72222	225.841	164	279	328825	17.5038	2.70552	1456	225.841	164	279	328825	17.5038	2.72222	353.824	213	658	515168	78.7104	2.70552	1456	353.824	213	658	515168	78.7104	2.72222	1	px	Intensity	2.32285
Merged	6851.95	4517.68	-5635	-5767.1	406	938	115.877	77	269	108693	16.6985	2.70552	938	115.877	77	269	108693	16.6985	2.72222	229.557	164	286	215324	17.7475	2.70552	938	229.557	164	286	215324	17.7475	2.72222	312.821	178	548	293426	89.0691	2.70552	938	312.821	178	548	293426	89.0691	2.72222	1	px	Intensity	2.32142
Merged	6851.95	4517.68	-5635	-5767.1	189	347	118.078	92	268	40973	18.8348	2.70552	347	118.078	92	268	40973	18.8348	2.72222	251.403	193	327	87237	22.3701	2.70552	347	251.403	193	327	87237	22.3701	2.72222	331.916	216	523	115175	72.277	2.70552	347	331.916	216	523	115175	72.277	2.72222	1	px	Intensity	2.26969
Merged	6851.95	4517.68	-5635	-5767.1	482	1783	115.137	85	260	205289	12.7933	2.70552	1783	115.137	85	260	205289	12.7933	2.72222	235.208	180	318	419376	21.0872	2.70552	1783	235.208	180	318	419376	21.0872	2.72222	400.246	201	1111	713638	129.023	2.70552	1783	400.246	201	1111	713638	129.023	2.72222	1	px	Intensity	2.25818
Merged	6851.95	4517.68	-5635	-5767.1	504	2479	117.248	81	263	290657	11.8758	2.70552	2479	117.248	81	263	290657	11.8758	2.72222	251.35	190	337	623096	21.0516	2.70552	2479	251.35	190	337	623096	21.0516	2.72222	386.68	165	1025	958580	128.222	2.70552	2479	386.68	165	1025	958580	128.222	2.72222	1	px	Intensity	2.24311
Merged	6851.95	4517.68	-5635	-5767.1	281	150	135.98	102	305	20397	33.9601	2.70552	150	135.98	102	305	20397	33.9601	2.72222	268.46	208	318	40269	21.8285	2.70552	150	268.46	208	318	40269	21.8285	2.72222	363.607	252	516	54541	69.7419	2.70552	150	363.607	252	516	54541	69.7419	2.72222	1	px	Intensity	2.24298
Merged	6851.95	4517.68	-5635	-5767.1	27	305	116.446	96	261	35516	20.9335	2.70552	305	116.446	96	261	35516	20.9335	2.72222	226.492	172	271	69080	18.5242	2.70552	305	226.492	172	271	69080	18.5242	2.72222	321.272	203	522	97988	88.6257	2.70552	305	321.272	203	522	97988	88.6257	2.72222	1	px	Intensity	2.24138
Merged	6851.95	4517.68	-5635	-5767.1	301	808	113.429	76	254	91651	13.7468	2.70552	808	113.429	76	254	91651	13.7468	2.72222	235.343	188	293	190157	18.3004	2.70552	808	235.343	188	293	190157	18.3004	2.72222	365.647	206	947	295443	122.397	2.70552	808	365.647	206	947	295443	122.397	2.72222	1	px	Intensity	2.23928
Merged	6851.95	4517.68	-5635	-5767.1	179	972	117.04	80	257	113763	16.3321	2.70552	972	117.04	80	257	113763	16.3321	2.72222	234.324	175	309	227763	24.2781	2.70552	972	234.324	175	309	227763	24.2781	2.72222	353.672	232	564	343769	71.26	2.70552	972	353.672	232	564	343769	71.26	2.72222	1	px	Intensity	2.19583
Merged	6851.95	4517.68	-5635	-5767.1	23	1238	111.909	61	244	138543	11.9668	2.70552	1238	111.909	61	244	138543	11.9668	2.72222	216.71	169	277	268287	17.7823	2.70552	1238	216.71	169	277	268287	17.7823	2.72222	362.116	221	722	448300	80.4807	2.70552	1238	362.116	221	722	448300	80.4807	2.72222	1	px	Intensity	2.18035
Merged	6851.95	4517.68	-5635	-5767.1	378	298	123.574	96	266	36825	26.3669	2.70552	298	123.574	96	266	36825	26.3669	2.72222	236.409	186	288	70450	18.2577	2.70552	298	236.409	186	288	70450	18.2577	2.72222	329.232	207	518	98111	77.6299	2.70552	298	329.232	207	518	98111	77.6299	2.72222	1	px	Intensity	2.15256
Merged	6851.95	4517.68	-5635	-5767.1	433	1120	112.633	90	242	126149	10.0527	2.70552	1120	112.633	90	242	126149	10.0527	2.72222	222.168	171	273	248828	16.5616	2.70552	1120	222.168	171	273	248828	16.5616	2.72222	374.892	235	720	419879	80.0102	2.70552	1120	374.892	235	720	419879	80.0102	2.72222	1	px	Intensity	2.14857
Merged	6851.95	4517.68	-5635	-5767.1	425	442	115.907	82	246	51231	19.1502	2.70552	442	115.907	82	246	51231	19.1502	2.72222	225.434	180	280	99642	16.842	2.70552	442	225.434	180	280	99642	16.842	2.72222	330.269	213	539	145979	78.5055	2.70552	442	330.269	213	539	145979	78.5055	2.72222	1	px	Intensity	2.12239
Merged	6851.95	4517.68	-5635	-5767.1	50	1405	117.54	95	249	165144	12.6236	2.70552	1405	117.54	95	249	165144	12.6236	2.72222	241.358	182	317	339108	19.4863	2.70552	1405	241.358	182	317	339108	19.4863	2.72222	372.607	178	954	523513	111.875	2.70552	1405	372.607	178	954	523513	111.875	2.72222	1	px	Intensity	2.11842
Merged	6851.95	4517.68	-5635	-5767.1	535	232	120.526	96	255	27962	23.1622	2.70552	232	120.526	96	255	27962	23.1622	2.72222	251.306	191	314	58303	22.1303	2.70552	232	251.306	191	314	58303	22.1303	2.72222	322.306	206	525	74775	82.0847	2.70552	232	322.306	206	525	74775	82.0847	2.72222	1	px	Intensity	2.11573
Merged	6851.95	4517.68	-5635	-5767.1	134	1748	112.386	90	236	196450	10.1932	2.70552	1748	112.386	90	236	196450	10.1932	2.72222	223.807	159	302	391215	22.2544	2.70552	1748	223.807	159	302	391215	22.2544	2.72222	396.603	259	1029	693262	94.2613	2.70552	1748	396.603	259	1029	693262	94.2613	2.72222	1	px	Intensity	2.09991
Merged	6851.95	4517.68	-5635	-5767.1	474	434	118.631	99	249	51486	18.9902	2.70552	434	118.631	99	249	51486	18.9902	2.72222	243.544	186	309	105698	25.4777	2.70552	434	243.544	186	309	105698	25.4777	2.72222	373.744	225	565	162205	70.2225	2.70552	434	373.744	225	565	162205	70.2225	2.72222	1	px	Intensity	2.09894
Merged	6851.95	4517.68	-5635	-5767.1	215	1221	115.106	88	239	140545	12.6006	2.70552	1221	115.106	88	239	140545	12.6006	2.72222	227.463	167	300	277732	19.9481	2.70552	1221	227.463	167	300	277732	19.9481	2.72222	323.4	189	541	394872	83.6623	2.70552	1221	323.4	189	541	394872	83.6623	2.72222	1	px	Intensity	2.07634
Merged	6851.95	4517.68	-5635	-5767.1	466	852	115.252	81	237	98195	14.1864	2.70552	852	115.252	81	237	98195	14.1864	2.72222	226.203	175	283	192725	16.4155	2.70552	852	226.203	175	283	192725	16.4155	2.72222	326.727	199	540	278371	78.735	2.70552	852	326.727	199	540	278371	78.735	2.72222	1	px	Intensity	2.05636
Merged	6851.95	4517.68	-5635	-5767.1	279	874	114.487	80	233	100062	12.7457	2.70552	874	114.487	80	233	100062	12.7457	2.72222	234.272	172	296	204754	17.0255	2.70552	874	234.272	172	296	204754	17.0255	2.72222	329.088	199	557	287623	75.7555	2.70552	874	329.088	199	557	287623	75.7555	2.72222	1	px	Intensity	2.03516
Merged	6851.95	4517.68	-5635	-5767.1	165	372	117.309	84	238	43639	18.156	2.70552	372	117.309	84	238	43639	18.156	2.72222	235.417	183	293	87575	19.2596	2.70552	372	235.417	183	293	87575	19.2596	2.72222	361.728	257	519	134563	67.4059	2.70552	372	361.728	257	519	134563	67.4059	2.72222	1	px	Intensity	2.02883
Merged	6851.95	4517.68	-5635	-5767.1	501	330	121.782	97	247	40188	21.6852	2.70552	330	121.782	97	247	40188	21.6852	2.72222	235.785	190	297	77809	19.809	2.70552	330	235.785	190	297	77809	19.809	2.72222	298.552	177	546	98522	97.136	2.70552	330	298.552	177	546	98522	97.136	2.72222	1	px	Intensity	2.02822
Merged	6851.95	4517.68	-5635	-5767.1	398	1129	117.593	92	237	132762	12.8856	2.70552	1129	117.593	92	237	132762	12.8856	2.72222	236.258	182	307	266735	18.0479	2.70552	1129	236.258	182	307	266735	18.0479	2.72222	335.157	182	876	378392	104.435	2.70552	1129	335.157	182	876	378392	104.435	2.72222	1	px	Intensity	2.01543
Merged	6851.95	4517.68	-5635	-5767.1	341	1316	125.466	90	251	165113	16.8132	2.70552	1316	125.466	90	251	165113	16.8132	2.72222	267.586	185	369	352143	30.6974	2.70552	1316	267.586	185	369	352143	30.6974	2.72222	374.3	205	1088	492579	137.197	2.70552	1316	374.3	205	1088	492579	137.197	2.72222	1	px	Intensity	2.00055
Merged	6851.95	4517.68	-5635	-5767.1	137	1177	116.501	92	232	137122	12.5112	2.70552	1177	116.501	92	232	137122	12.5112	2.72222	235.331	181	293	276985	17.7196	2.70552	1177	235.331	181	293	276985	17.7196	2.72222	367.08	204	945	432053	96.912	2.70552	1177	367.08	204	945	432053	96.912	2.72222	1	px	Intensity	1.99139
Merged	6851.95	4517.68	-5635	-5767.1	203	393	116.137	78	230	45642	13.5806	2.70552	393	116.137	78	230	45642	13.5806	2.72222	242.56	189	380	95326	20.8031	2.70552	393	242.56	189	380	95326	20.8031	2.72222	314.443	193	516	123576	85.6575	2.70552	393	314.443	193	516	123576	85.6575	2.72222	1	px	Intensity	1.98041
Merged	6851.95	4517.68	-5635	-5767.1	496	833	116.631	91	230	97154	12.6508	2.70552	833	116.631	91	230	97154	12.6508	2.72222	244.902	177	321	204003	21.9402	2.70552	833	244.902	177	321	204003	21.9402	2.72222	361.593	220	574	301207	72.8573	2.70552	833	361.593	220	574	301207	72.8573	2.72222	1	px	Intensity	1.97202
Merged	6851.95	4517.68	-5635	-5767.1	519	1821	114.126	90	225	207823	11.472	2.70552	1821	114.126	90	225	207823	11.472	2.72222	234.411	168	322	426863	22.5164	2.70552	1821	234.411	168	322	426863	22.5164	2.72222	380.293	204	1114	692513	109.897	2.70552	1821	380.293	204	1114	692513	109.897	2.72222	1	px	Intensity	1.97151
Merged	6851.95	4517.68	-5635	-5767.1	310	2037	116.256	83	227	236813	10.9299	2.70552	2037	116.256	83	227	236813	10.9299	2.72222	245.559	187	322	500203	19.9581	2.70552	2037	245.559	187	322	500203	19.9581	2.72222	367.146	173	884	747877	109.364	2.70552	2037	367.146	173	884	747877	109.364	2.72222	1	px	Intensity	1.95259
Merged	6851.95	4517.68	-5635	-5767.1	373	995	121.006	91	236	120401	12.0598	2.70552	995	121.006	91	236	120401	12.0598	2.72222	244.139	180	311	242918	19.5608	2.70552	995	244.139	180	311	242918	19.5608	2.72222	377.445	201	634	375558	81.8643	2.70552	995	377.445	201	634	375558	81.8643	2.72222	1	px	Intensity	1.95032
Merged	6851.95	4517.68	-5635	-5767.1	327	820	116.052	90	226	95163	13.3803	2.70552	820	116.052	90	226	95163	13.3803	2.72222	234.552	176	286	192333	18.2987	2.70552	820	234.552	176	286	192333	18.2987	2.72222	326.599	225	538	267811	69.9995	2.70552	820	326.599	225	538	267811	69.9995	2.72222	1	px	Intensity	1.9474
Merged	6851.95	4517.68	-5635	-5767.1	485	1052	114.894	95	223	120868	11.6192	2.70552	1052	114.894	95	223	120868	11.6192	2.72222	226.33	171	303	238099	17.5332	2.70552	1052	226.33	171	303	238099	17.5332	2.72222	329.583	196	579	346721	79.669	2.70552	1052	329.583	196	579	346721	79.669	2.72222	1	px	Intensity	1.94093
Merged	6851.95	4517.68	-5635	-5767.1	201	1571	114.613	88	222	180057	10.689	2.70552	1571	114.613	88	222	180057	10.689	2.72222	229.472	179	278	360501	17.2873	2.70552	1571	229.472	179	278	360501	17.2873	2.72222	379.423	235	765	596074	74.3247	2.70552	1571	379.423	235	765	596074	74.3247	2.72222	1	px	Intensity	1.93695
Merged	6851.95	4517.68	-5635	-5767.1	258	1128	116.276	87	225	131159	15.0365	2.70552	1128	116.276	87	225	131159	15.0365	2.72222	242.639	174	312	273697	19.5511	2.70552	1128	242.639	174	312	273697	19.5511	2.72222	344.311	210	717	388383	79.9699	2.70552	1128	344.311	210	717	388383	79.9699	2.72222	1	px	Intensity	1.93506
Merged	6851.95	4517.68	-5635	-5767.1	539	589	112.905	95	218	66501	13.2593	2.70552	589	112.905	95	218	66501	13.2593	2.72222	221.776	174	270	130626	17.0455	2.70552	589	221.776	174	270	130626	17.0455	2.72222	357.457	210	554	210542	76.3502	2.70552	589	357.457	210	554	210542	76.3502	2.72222	1	px	Intensity	1.93083
Merged	6851.95	4517.68	-5635	-5767.1	558	998	117.488	87	226	117253	14.9747	2.70552	998	117.488	87	226	117253	14.9747	2.72222	244.965	178	323	244475	25.3873	2.70552	998	244.965	178	323	244475	25.3873	2.72222	336.094	198	554	335422	73.2057	2.70552	998	336.094	198	554	335422	73.2057	2.72222	1	px	Intensity	1.9236
Merged	6851.95	4517.68	-5635	-5767.1	385	469	117.597	95	223	55153	17.3533	2.70552	469	117.597	95	223	55153	17.3533	2.72222	240.341	176	312	112720	23.36	2.70552	469	240.341	176	312	112720	23.36	2.72222	349.092	198	563	163724	88.1129	2.70552	469	349.092	198	563	163724	88.1129	2.72222	1	px	Intensity	1.89631
Merged	6851.95	4517.68	-5635	-5767.1	552	581	113.582	78	213	65991	11.9389	2.70552	581	113.582	78	213	65991	11.9389	2.72222	227.563	176	281	132214	18.0308	2.70552	581	227.563	176	281	132214	18.0308	2.72222	376.277	243	552	218617	68.4664	2.70552	581	376.277	243	552	218617	68.4664	2.72222	1	px	Intensity	1.8753
Merged	6851.95	4517.68	-5635	-5767.1	313	254	118.205	99	221	30024	18.617	2.70552	254	118.205	99	221	30024	18.617	2.72222	230.008	181	282	58422	18.2911	2.70552	254	230.008	181	282	58422	18.2911	2.72222	312.453	180	581	79363	103.019	2.70552	254	312.453	180	581	79363	103.019	2.72222	1	px	Intensity	1.86964
Merged	6851.95	4517.68	-5635	-5767.1	359	175	139.583	109	258	24427	29.2743	2.70552	175	139.583	109	258	24427	29.2743	2.72222	282.731	225	329	49478	19.6519	2.70552	175	282.731	225	329	49478	19.6519	2.72222	411.651	263	524	72039	64.772	2.70552	175	411.651	263	524	72039	64.772	2.72222	1	px	Intensity	1.84836
Merged	6851.95	4517.68	-5635	-5767.1	370	1154	115.256	88	211	133005	10.6064	2.70552	1154	115.256	88	211	133005	10.6064	2.72222	228.624	171	301	263832	19.6246	2.70552	1154	228.624	171	301	263832	19.6246	2.72222	398.518	248	996	459890	105.574	2.70552	1154	398.518	248	996	459890	105.574	2.72222	1	px	Intensity	1.83071
Merged	6851.95	4517.68	-5635	-5767.1	46	419	115.845	87	212	48539	16.7792	2.70552	419	115.845	87	212	48539	16.7792	2.72222	216.587	170	266	90750	18.0404	2.70552	419	216.587	170	266	90750	18.0404	2.72222	352.095	215	526	147528	72.8512	2.70552	419	352.095	215	526	147528	72.8512	2.72222	1	px	Intensity	1.83003
Merged	6851.95	4517.68	-5635	-5767.1	122	337	121.484	94	221	40940	17.9983	2.70552	337	121.484	94	221	40940	17.9983	2.72222	248.899	190	304	83879	23.3729	2.70552	337	248.899	190	304	83879	23.3729	2.72222	309.273	175	533	104225	92.3358	2.70552	337	309.273	175	533	104225	92.3358	2.72222	1	px	Intensity	1.81917
Merged	6851.95	4517.68	-5635	-5767.1	303	709	117.661	93	214	83422	15.7872	2.70552	709	117.661	93	214	83422	15.7872	2.72222	227.477	177	279	161281	17.1503	2.70552	709	227.477	177	279	161281	17.1503	2.72222	326.116	203	544	231216	69.7591	2.70552	709	326.116	203	544	231216	69.7591	2.72222	1	px	Intensity	1.81878
Merged	6851.95	4517.68	-5635	-5767.1	537	967	115.632	93	210	111816	13.1725	2.70552	967	115.632	93	210	111816	13.1725	2.72222	227.233	180	282	219734	17.188	2.70552	967	227.233	180	282	219734	17.188	2.72222	328.956	184	590	318100	93.6392	2.70552	967	328.956	184	590	318100	93.6392	2.72222	1	px	Intensity	1.81611
Merged	6851.95	4517.68	-5635	-5767.1	355	636	111.871	95	203	71150	10.4218	2.70552	636	111.871	95	203	71150	10.4218	2.72222	220.725	178	278	140381	15.7486	2.70552	636	220.725	178	278	140381	15.7486	2.72222	368.129	231	539	234130	71.3009	2.70552	636	368.129	231	539	234130	71.3009	2.72222	1	px	Intensity	1.81459
Merged	6851.95	4517.68	-5635	-5767.1	431	851	119.025	92	215	101290	14.7569	2.70552	851	119.025	92	215	101290	14.7569	2.72222	250.626	184	307	213283	19.0134	2.70552	851	250.626	184	307	213283	19.0134	2.72222	337.826	215	550	287490	73.7714	2.70552	851	337.826	215	550	287490	73.7714	2.72222	1	px	Intensity	1.80635
Merged	6851.95	4517.68	-5635	-5767.1	60	494	114.591	97	206	56608	13.8518	2.70552	494	114.591	97	206	56608	13.8518	2.72222	224.069	179	277	110690	17.2525	2.70552	494	224.069	179	277	110690	17.2525	2.72222	343.69	219	538	169783	76.8938	2.70552	494	343.69	219	538	169783	76.8938	2.72222	1	px	Intensity	1.7977
Merged	6851.95	4517.68	-5635	-5767.1	460	2377	117.159	92	210	278488	9.03764	2.70552	2377	117.159	92	210	278488	9.03764	2.72222	240.571	184	320	571838	18.8665	2.70552	2377	240.571	184	320	571838	18.8665	2.72222	415.635	186	1382	987965	157.901	2.70552	2377	415.635	186	1382	987965	157.901	2.72222	1	px	Intensity	1.79243
Merged	6851.95	4517.68	-5635	-5767.1	329	328	118.985	94	213	39027	16.4434	2.70552	328	118.985	94	213	39027	16.4434	2.72222	238.86	185	280	78346	18.6553	2.70552	328	238.86	185	280	78346	18.6553	2.72222	307.555	194	524	100878	91.6278	2.70552	328	307.555	194	524	100878	91.6278	2.72222	1	px	Intensity	1.79015
Merged	6851.95	4517.68	-5635	-5767.1	196	172	122.895	101	219	21138	17.7647	2.70552	172	122.895	101	219	21138	17.7647	2.72222	238.552	183	274	41031	16.0057	2.70552	172	238.552	183	274	41031	16.0057	2.72222	420.076	286	566	72253	47.6265	2.70552	172	420.076	286	566	72253	47.6265	2.72222	1	px	Intensity	1.782
Merged	6851.95	4517.68	-5635	-5767.1	502	434	121.297	81	216	52643	16.913	2.70552	434	121.297	81	216	52643	16.913	2.72222	251.143	194	313	108996	18.6315	2.70552	434	251.143	194	313	108996	18.6315	2.72222	386.859	268	571	167897	61.4671	2.70552	434	386.859	268	571	167897	61.4671	2.72222	1	px	Intensity	1.78075
Merged	6851.95	4517.68	-5635	-5767.1	490	1733	115.765	95	206	200621	9.84938	2.70552	1733	115.765	95	206	200621	9.84938	2.72222	233.802	186	307	405178	17.5075	2.70552	1733	233.802	186	307	405178	17.5075	2.72222	358.905	212	593	621983	80.1641	2.70552	1733	358.905	212	593	621983	80.1641	2.72222	1	px	Intensity	1.77946
Merged	6851.95	4517.68	-5635	-5767.1	495	481	118.218	97	209	56863	11.3361	2.70552	481	118.218	97	209	56863	11.3361	2.72222	240.148	193	301	115511	19.4012	2.70552	481	240.148	193	301	115511	19.4012	2.72222	343.071	187	559	165017	85.1478	2.70552	481	343.071	187	559	165017	85.1478	2.72222	1	px	Intensity	1.76792
Merged	6851.95	4517.68	-5635	-5767.1	16	520	112.933	77	199	58725	13.5556	2.70552	520	112.933	77	199	58725	13.5556	2.72222	214.167	171	260	111367	16.0705	2.70552	520	214.167	171	260	111367	16.0705	2.72222	333.773	214	526	173562	72.841	2.70552	520	333.773	214	526	173562	72.841	2.72222	1	px	Intensity	1.76211
Merged	6851.95	4517.68	-5635	-5767.1	173	1107	116.947	86	206	129460	10.8901	2.70552	1107	116.947	86	206	129460	10.8901	2.72222	245.099	191	314	271325	18.4367	2.70552	1107	245.099	191	314	271325	18.4367	2.72222	364.464	215	556	403462	74.8951	2.70552	1107	364.464	215	556	403462	74.8951	2.72222	1	px	Intensity	1.76149
Merged	6851.95	4517.68	-5635	-5767.1	414	798	114.591	82	201	91444	13.1655	2.70552	798	114.591	82	201	91444	13.1655	2.72222	230.024	181	314	183559	21.077	2.70552	798	230.024	181	314	183559	21.077	2.72222	350.805	235	534	279942	68.5952	2.70552	798	350.805	235	534	279942	68.5952	2.72222	1	px	Intensity	1.75406
Merged	6851.95	4517.68	-5635	-5767.1	533	1163	117.484	93	201	136634	10.7297	2.70552	1163	117.484	93	201	136634	10.7297	2.72222	251.788	181	315	292829	22.227	2.70552	1163	251.788	181	315	292829	22.227	2.72222	344.569	193	850	400734	92.967	2.70552	1163	344.569	193	850	400734	92.967	2.72222	1	px	Intensity	1.71087
Merged	6851.95	4517.68	-5635	-5767.1	506	908	114.047	76	195	103555	9.34869	2.70552	908	114.047	76	195	103555	9.34869	2.72222	228.356	176	281	207347	16.6532	2.70552	908	228.356	176	281	207347	16.6532	2.72222	315.21	180	566	286211	80.5561	2.70552	908	315.21	180	566	286211	80.5561	2.72222	1	px	Intensity	1.70982
Merged	6851.95	4517.68	-5635	-5767.1	207	1020	113.549	89	194	115820	9.19434	2.70552	1020	113.549	89	194	115820	9.19434	2.72222	227.592	179	286	232144	17.5577	2.70552	1020	227.592	179	286	232144	17.5577	2.72222	337.613	227	556	344365	65.5519	2.70552	1020	337.613	227	556	344365	65.5519	2.72222	1	px	Intensity	1.70851
Merged	6851.95	4517.68	-5635	-5767.1	262	380	118.042	94	201	44856	15.6207	2.70552	380	118.042	94	201	44856	15.6207	2.72222	241.592	185	308	91805	20.7163	2.70552	380	241.592	185	308	91805	20.7163	2.72222	334.355	213	569	127055	77.2789	2.70552	380	334.355	213	569	127055	77.2789	2.72222	1	px	Intensity	1.70278
Merged	6851.95	4517.68	-5635	-5767.1	174	419	117.523	95	199	49242	14.7013	2.70552	419	117.523	95	199	49242	14.7013	2.72222	226.418	185	283	94869	16.2729	2.70552	419	226.418	185	283	94869	16.2729	2.72222	316.924	161	582	132791	100.205	2.70552	419	316.924	161	582	132791	100.205	2.72222	1	px	Intensity	1.69329
Merged	6851.95	4517.68	-5635	-5767.1	320	326	119.592	100	202	38987	16.2598	2.70552	326	119.592	100	202	38987	16.2598	2.72222	246.077	184	324	80221	24.9372	2.70552	326	246.077	184	324	80221	24.9372	2.72222	350.15	236	537	114149	77.456	2.70552	326	350.15	236	537	114149	77.456	2.72222	1	px	Intensity	1.68908
Merged	6851.95	4517.68	-5635	-5767.1	188	1202	118.247	81	198	142133	11.282	2.70552	1202	118.247	81	198	142133	11.282	2.72222	245.933	180	333	295611	21.075	2.70552	1202	245.933	180	333	295611	21.075	2.72222	383.062	213	580	460441	74.3949	2.70552	1202	383.062	213	580	460441	74.3949	2.72222	1	px	Intensity	1.67446
Merged	6851.95	4517.68	-5635	-5767.1	404	932	119.134	94	199	111033	10.1571	2.70552	932	119.134	94	199	111033	10.1571	2.72222	246.241	195	320	229497	19.4944	2.70552	932	246.241	195	320	229497	19.4944	2.72222	327.771	192	595	305483	82.9988	2.70552	932	327.771	192	595	305483	82.9988	2.72222	1	px	Intensity	1.67039
Merged	6851.95	4517.68	-5635	-5767.1	322	1296	115.11	88	192	149182	10.5262	2.70552	1296	115.11	88	192	149182	10.5262	2.72222	232.938	185	295	301888	19.1574	2.70552	1296	232.938	185	295	301888	19.1574	2.72222	345.593	224	568	447888	65.2427	2.70552	1296	345.593	224	568	447888	65.2427	2.72222	1	px	Intensity	1.66798
Merged	6851.95	4517.68	-5635	-5767.1	53	512	114.807	89	191	58781	12.9497	2.70552	512	114.807	89	191	58781	12.9497	2.72222	237.27	173	294	121482	20.3805	2.70552	512	237.27	173	294	121482	20.3805	2.72222	326.504	218	515	167170	78.6332	2.70552	512	326.504	218	515	167170	78.6332	2.72222	1	px	Intensity	1.66367
Merged	6851.95	4517.68	-5635	-5767.1	436	1338	113.024	70	188	151226	8.81672	2.70552	1338	113.024	70	188	151226	8.81672	2.72222	216.169	169	276	289234	16.0673	2.70552	1338	216.169	169	276	289234	16.0673	2.72222	342.46	161	565	458212	87.9006	2.70552	1338	342.46	161	565	458212	87.9006	2.72222	1	px	Intensity	1.66336
Merged	6851.95	4517.68	-5635	-5767.1	89	479	111.303	88	185	53314	9.33926	2.70552	479	111.303	88	185	53314	9.33926	2.72222	214.741	167	266	102861	16.7099	2.70552	479	214.741	167	266	102861	16.7099	2.72222	340.493	231	549	163096	74.6249	2.70552	479	340.493	231	549	163096	74.6249	2.72222	1	px	Intensity	1.66213
Merged	6851.95	4517.68	-5635	-5767.1	545	394	123.34	96	205	48596	18.6257	2.70552	394	123.34	96	205	48596	18.6257	2.72222	229.056	172	295	90248	20.9713	2.70552	394	229.056	172	295	90248	20.9713	2.72222	364.376	209	573	143564	77.5208	2.70552	394	364.376	209	573	143564	77.5208	2.72222	1	px	Intensity	1.66207
Merged	6851.95	4517.68	-5635	-5767.1	82	959	115.899	82	192	111147	13.1422	2.70552	959	115.899	82	192	111147	13.1422	2.72222	230.02	167	304	220589	22.0864	2.70552	959	230.02	167	304	220589	22.0864	2.72222	354.842	235	541	340293	65.4384	2.70552	959	354.842	235	541	340293	65.4384	2.72222	1	px	Intensity	1.65662
Merged	6851.95	4517.68	-5635	-5767.1	325	602	128.734	101	213	77498	14.6006	2.70552	602	128.734	101	213	77498	14.6006	2.72222	288.784	237	354	173848	19.6493	2.70552	602	288.784	237	354	173848	19.6493	2.72222	360.243	180	554	216866	89.9593	2.70552	602	360.243	180	554	216866	89.9593	2.72222	1	px	Intensity	1.65457
Merged	6851.95	4517.68	-5635	-5767.1	441	330	116.827	99	193	38553	14.7234	2.70552	330	116.827	99	193	38553	14.7234	2.72222	223.77	178	263	73844	15.8379	2.70552	330	223.77	178	263	73844	15.8379	2.72222	346.655	227	518	114396	76.0478	2.70552	330	346.655	227	518	114396	76.0478	2.72222	1	px	Intensity	1.65201
Merged	6851.95	4517.68	-5635	-5767.1	295	912	115.559	95	190	105390	9.45926	2.70552	912	115.559	95	190	105390	9.45926	2.72222	226.148	177	275	206247	16.1992	2.70552	912	226.148	177	275	206247	16.1992	2.72222	354.06	201	566	322903	84.7627	2.70552	912	354.06	201	566	322903	84.7627	2.72222	1	px	Intensity	1.64418
Merged	6851.95	4517.68	-5635	-5767.1	111	880	116.66	82	191	102661	11.6185	2.70552	880	116.66	82	191	102661	11.6185	2.72222	240.886	179	316	211980	21.7375	2.70552	880	240.886	179	316	211980	21.7375	2.72222	322.983	190	525	284225	79.0519	2.70552	880	322.983	190	525	284225	79.0519	2.72222	1	px	Intensity	1.63723
Merged	6851.95	4517.68	-5635	-5767.1	272	558	121.686	90	199	67901	14.9434	2.70552	558	121.686	90	199	67901	14.9434	2.72222	246.78	181	294	137703	18.5085	2.70552	558	246.78	181	294	137703	18.5085	2.72222	333.192	171	560	185921	91.0972	2.70552	558	333.192	171	560	185921	91.0972	2.72222	1	px	Intensity	1.63535
Merged	6851.95	4517.68	-5635	-5767.1	156	403	117.035	94	191	47165	12.2205	2.70552	403	117.035	94	191	47165	12.2205	2.72222	239.412	174	297	96483	20.8785	2.70552	403	239.412	174	297	96483	20.8785	2.72222	333.732	211	550	134494	79.861	2.70552	403	333.732	211	550	134494	79.861	2.72222	1	px	Intensity	1.63199
Merged	6851.95	4517.68	-5635	-5767.1	180	1084	112.868	87	184	122349	8.3393	2.70552	1084	112.868	87	184	122349	8.3393	2.72222	227.734	154	291	246864	17.5876	2.70552	1084	227.734	154	291	246864	17.5876	2.72222	341.501	220	592	370187	66.843	2.70552	1084	341.501	220	592	370187	66.843	2.72222	1	px	Intensity	1.63022
Merged	6851.95	4517.68	-5635	-5767.1	153	997	114.862	85	187	114517	10.0311	2.70552	997	114.862	85	187	114517	10.0311	2.72222	233.469	166	292	232769	19.1183	2.70552	997	233.469	166	292	232769	19.1183	2.72222	331.008	176	588	330015	86.0629	2.70552	997	331.008	176	588	330015	86.0629	2.72222	1	px	Intensity	1.62805
Merged	6851.95	4517.68	-5635	-5767.1	40	522	110.77	88	180	57822	6.86209	2.70552	522	110.77	88	180	57822	6.86209	2.72222	213.148	172	263	111263	15.5662	2.70552	522	213.148	172	263	111263	15.5662	2.72222	342.818	210	553	178951	78.8003	2.70552	522	342.818	210	553	178951	78.8003	2.72222	1	px	Intensity	1.62499
Merged	6851.95	4517.68	-5635	-5767.1	100	275	118.931	99	193	32706	15.5669	2.70552	275	118.931	99	193	32706	15.5669	2.72222	223.375	178	268	61428	15.7033	2.70552	275	223.375	178	268	61428	15.7033	2.72222	320.665	190	544	88183	95.5197	2.70552	275	320.665	190	544	88183	95.5197	2.72222	1	px	Intensity	1.62279
Merged	6851.95	4517.68	-5635	-5767.1	30	791	117.941	95	191	93291	10.8864	2.70552	791	117.941	95	191	93291	10.8864	2.72222	245.32	181	325	194048	22.3835	2.70552	791	245.32	181	325	194048	22.3835	2.72222	325.115	192	520	257166	81.967	2.70552	791	325.115	192	520	257166	81.967	2.72222	1	px	Intensity	1.61946
Merged	6851.95	4517.68	-5635	-5767.1	230	945	113.19	86	183	106965	9.05691	2.70552	945	113.19	86	183	106965	9.05691	2.72222	229.579	180	290	216952	18.2283	2.70552	945	229.579	180	290	216952	18.2283	2.72222	370.129	205	980	349772	127.542	2.70552	945	370.129	205	980	349772	127.542	2.72222	1	px	Intensity	1.61674
Merged	6851.95	4517.68	-5635	-5767.1	561	447	114.331	95	184	51106	12.3192	2.70552	447	114.331	95	184	51106	12.3192	2.72222	231.503	177	284	103482	19.9608	2.70552	447	231.503	177	284	103482	19.9608	2.72222	320.893	205	529	143439	82.3935	2.70552	447	320.893	205	529	143439	82.3935	2.72222	1	px	Intensity	1.60936
Merged	6851.95	4517.68	-5635	-5767.1	464	490	115.063	97	184	56381	11.2292	2.70552	490	115.063	97	184	56381	11.2292	2.72222	246.81	176	324	120937	23.6259	2.70552	490	246.81	176	324	120937	23.6259	2.72222	339.369	229	519	166291	72.3426	2.70552	490	339.369	229	519	166291	72.3426	2.72222	1	px	Intensity	1.59912
Merged	6851.95	4517.68	-5635	-5767.1	505	499	113.86	91	182	56816	10.5201	2.70552	499	113.86	91	182	56816	10.5201	2.72222	231.04	174	291	115289	18.7913	2.70552	499	231.04	174	291	115289	18.7913	2.72222	321.018	202	543	160188	84.7926	2.70552	499	321.018	202	543	160188	84.7926	2.72222	1	px	Intensity	1.59846
Merged	6851.95	4517.68	-5635	-5767.1	162	1618	115.773	94	185	187320	8.73629	2.70552	1618	115.773	94	185	187320	8.73629	2.72222	235.444	184	310	380948	19.4529	2.70552	1618	235.444	184	310	380948	19.4529	2.72222	359.478	197	906	581636	100.381	2.70552	1618	359.478	197	906	581636	100.381	2.72222	1	px	Intensity	1.59796
Merged	6851.95	4517.68	-5635	-5767.1	76	575	111.635	70	178	64190	9.881	2.70552	575	111.635	70	178	64190	9.881	2.72222	230.252	174	274	132395	18.3682	2.70552	575	230.252	174	274	132395	18.3682	2.72222	311.377	203	559	179042	73.5738	2.70552	575	311.377	203	559	179042	73.5738	2.72222	1	px	Intensity	1.59449
Merged	6851.95	4517.68	-5635	-5767.1	146	952	116.186	85	185	110609	10.1671	2.70552	952	116.186	85	185	110609	10.1671	2.72222	243.186	174	323	231513	22.8647	2.70552	952	243.186	174	323	231513	22.8647	2.72222	363.061	181	805	345634	107.373	2.70552	952	363.061	181	805	345634	107.373	2.72222	1	px	Intensity	1.59228
Merged	6851.95	4517.68	-5635	-5767.1	234	1360	118.934	95	189	161750	10.3426	2.70552	1360	118.934	95	189	161750	10.3426	2.72222	243.926	183	302	331740	18.3777	2.70552	1360	243.926	183	302	331740	18.3777	2.72222	344.905	208	555	469071	75.8915	2.70552	1360	344.905	208	555	469071	75.8915	2.72222	1	px	Intensity	1.58912
Merged	6851.95	4517.68	-5635	-5767.1	333	542	120.288	91	191	65196	13.5749	2.70552	542	120.288	91	191	65196	13.5749	2.72222	259.801	202	322	140812	22.0887	2.70552	542	259.801	202	322	140812	22.0887	2.72222	307.284	182	558	166548	87.8083	2.70552	542	307.284	182	558	166548	87.8083	2.72222	1	px	Intensity	1.58786
Merged	6851.95	4517.68	-5635	-5767.1	472	1583	116.501	75	184	184421	9.77623	2.70552	1583	116.501	75	184	184421	9.77623	2.72222	236.787	179	306	374834	19.2157	2.70552	1583	236.787	179	306	374834	19.2157	2.72222	393.459	219	951	622846	103.201	2.70552	1583	393.459	219	951	622846	103.201	2.72222	1	px	Intensity	1.57939
Merged	6851.95	4517.68	-5635	-5767.1	427	1008	115.925	83	183	116852	9.38856	2.70552	1008	115.925	83	183	116852	9.38856	2.72222	235.404	172	314	237287	22.3086	2.70552	1008	235.404	172	314	237287	22.3086	2.72222	321.058	189	601	323626	88.5355	2.70552	1008	321.058	189	601	323626	88.5355	2.72222	1	px	Intensity	1.57861
Merged	6851.95	4517.68	-5635	-5767.1	302	817	114.126	89	180	93241	9.8084	2.70552	817	114.126	89	180	93241	9.8084	2.72222	225.141	172	284	183940	19.2789	2.70552	817	225.141	172	284	183940	19.2789	2.72222	325.909	195	559	266268	76.0428	2.70552	817	325.909	195	559	266268	76.0428	2.72222	1	px	Intensity	1.5772
Merged	6851.95	4517.68	-5635	-5767.1	77	454	113.194	98	178	51390	12.2113	2.70552	454	113.194	98	178	51390	12.2113	2.72222	223.396	175	280	101422	16.6057	2.70552	454	223.396	175	280	101422	16.6057	2.72222	322.604	174	524	146462	88.0198	2.70552	454	322.604	174	524	146462	88.0198	2.72222	1	px	Intensity	1.57252
Merged	6851.95	4517.68	-5635	-5767.1	487	303	118.97	97	187	36048	11.8848	2.70552	303	118.97	97	187	36048	11.8848	2.72222	259.69	197	310	78686	21.106	2.70552	303	259.69	197	310	78686	21.106	2.72222	345.865	213	534	104797	79.3222	2.70552	303	345.865	213	534	104797	79.3222	2.72222	1	px	Intensity	1.57182
Merged	6851.95	4517.68	-5635	-5767.1	512	269	118.097	92	185	31768	13.1339	2.70552	269	118.097	92	185	31768	13.1339	2.72222	249.223	176	311	67041	21.9302	2.70552	269	249.223	176	311	67041	21.9302	2.72222	342.052	236	518	92012	72.4455	2.70552	269	342.052	236	518	92012	72.4455	2.72222	1	px	Intensity	1.56651
Merged	6851.95	4517.68	-5635	-5767.1	216	425	115.066	81	180	48903	12.884	2.70552	425	115.066	81	180	48903	12.884	2.72222	226.791	173	309	96386	20.9798	2.70552	425	226.791	173	309	96386	20.9798	2.72222	368.419	236	540	156578	77.8554	2.70552	425	368.419	236	540	156578	77.8554	2.72222	1	px	Intensity	1.56432
Merged	6851.95	4517.68	-5635	-5767.1	560	499	110.727	83	173	55253	9.46755	2.70552	499	110.727	83	173	55253	9.46755	2.72222	206.699	158	263	103143	16.4612	2.70552	499	206.699	158	263	103143	16.4612	2.72222	389.934	260	554	194577	66.9074	2.70552	499	389.934	260	554	194577	66.9074	2.72222	1	px	Intensity	1.56239
Merged	6851.95	4517.68	-5635	-5767.1	529	486	114.383	99	177	55590	8.56582	2.70552	486	114.383	99	177	55590	8.56582	2.72222	233.901	184	286	113676	18.9639	2.70552	486	233.901	184	286	113676	18.9639	2.72222	297.765	179	526	144714	94.8981	2.70552	486	297.765	179	526	144714	94.8981	2.72222	1	px	Intensity	1.54744
Merged	6851.95	4517.68	-5635	-5767.1	300	1154	116.87	93	180	134868	9.06668	2.70552	1154	116.87	93	180	134868	9.06668	2.72222	246.185	180	308	284097	20.2573	2.70552	1154	246.185	180	308	284097	20.2573	2.72222	321.523	162	550	371038	88.1568	2.70552	1154	321.523	162	550	371038	88.1568	2.72222	1	px	Intensity	1.54017
Merged	6851.95	4517.68	-5635	-5767.1	98	1787	112.621	77	173	201254	9.18736	2.70552	1787	112.621	77	173	201254	9.18736	2.72222	212.792	148	263	380259	16.3759	2.70552	1787	212.792	148	263	380259	16.3759	2.72222	387.428	182	814	692334	104.467	2.70552	1787	387.428	182	814	692334	104.467	2.72222	1	px	Intensity	1.53612
Merged	6851.95	4517.68	-5635	-5767.1	91	618	111.406	96	171	68849	9.04052	2.70552	618	111.406	96	171	68849	9.04052	2.72222	211.971	170	262	130998	15.0564	2.70552	618	211.971	170	262	130998	15.0564	2.72222	306.77	169	555	189584	97.9175	2.70552	618	306.77	169	555	189584	97.9175	2.72222	1	px	Intensity	1.53492
Merged	6851.95	4517.68	-5635	-5767.1	481	1279	112.841	89	172	144323	7.2672	2.70552	1279	112.841	89	172	144323	7.2672	2.72222	231.386	161	314	295943	17.5728	2.70552	1279	231.386	161	314	295943	17.5728	2.72222	340.672	189	704	435720	86.5016	2.70552	1279	340.672	189	704	435720	86.5016	2.72222	1	px	Intensity	1.52428
Merged	6851.95	4517.68	-5635	-5767.1	489	622	116.185	100	177	72267	9.32427	2.70552	622	116.185	100	177	72267	9.32427	2.72222	228.913	168	279	142384	17.5052	2.70552	622	228.913	168	279	142384	17.5052	2.72222	313.45	161	551	194966	90.4717	2.70552	622	313.45	161	551	194966	90.4717	2.72222	1	px	Intensity	1.52343
Merged	6851.95	4517.68	-5635	-5767.1	418	870	117.664	96	179	102368	10.6661	2.70552	870	117.664	96	179	102368	10.6661	2.72222	237.272	189	294	206427	17.3046	2.70552	870	237.272	189	294	206427	17.3046	2.72222	383.179	197	581	333366	77.5241	2.70552	870	383.179	197	581	333366	77.5241	2.72222	1	px	Intensity	1.52128
Merged	6851.95	4517.68	-5635	-5767.1	292	361	116.548	93	176	42074	13.1099	2.70552	361	116.548	93	176	42074	13.1099	2.72222	230.199	166	291	83102	18.5714	2.70552	361	230.199	166	291	83102	18.5714	2.72222	306.873	161	556	110781	104.049	2.70552	361	306.873	161	556	110781	104.049	2.72222	1	px	Intensity	1.5101
Merged	6851.95	4517.68	-5635	-5767.1	314	802	119.3	92	180	95679	12.4666	2.70552	802	119.3	92	180	95679	12.4666	2.72222	259.213	192	365	207889	23.5384	2.70552	802	259.213	192	365	207889	23.5384	2.72222	297.667	173	584	238729	90.3558	2.70552	802	297.667	173	584	238729	90.3558	2.72222	1	px	Intensity	1.5088
Merged	6851.95	4517.68	-5635	-5767.1	222	832	114.014	82	172	94860	9.33911	2.70552	832	114.014	82	172	94860	9.33911	2.72222	231.123	179	292	192294	17.2204	2.70552	832	231.123	179	292	192294	17.2204	2.72222	350.776	224	560	291846	68.7986	2.70552	832	350.776	224	560	291846	68.7986	2.72222	1	px	Intensity	1.50858
Merged	6851.95	4517.68	-5635	-5767.1	419	756	118.353	100	178	89475	9.7387	2.70552	756	118.353	100	178	89475	9.7387	2.72222	238.381	187	308	180216	19.3808	2.70552	756	238.381	187	308	180216	19.3808	2.72222	339.11	208	526	256367	74.8778	2.70552	756	339.11	208	526	256367	74.8778	2.72222	1	px	Intensity	1.50397
Merged	6851.95	4517.68	-5635	-5767.1	75	719	111.942	95	168	80486	11.1129	2.70552	719	111.942	95	168	80486	11.1129	2.72222	209.263	163	256	150460	15.6963	2.70552	719	209.263	163	256	150460	15.6963	2.72222	357.451	211	567	257007	76.3943	2.70552	719	357.451	211	567	257007	76.3943	2.72222	1	px	Intensity	1.50078
Merged	6851.95	4517.68	-5635	-5767.1	492	628	114.175	80	171	71702	9.67733	2.70552	628	114.175	80	171	71702	9.67733	2.72222	226.494	177	290	142238	16.4237	2.70552	628	226.494	177	290	142238	16.4237	2.72222	340.889	203	571	214078	81.499	2.70552	628	340.889	203	571	214078	81.499	2.72222	1	px	Intensity	1.4977
Merged	6851.95	4517.68	-5635	-5767.1	141	851	116.197	93	174	98884	8.20466	2.70552	851	116.197	93	174	98884	8.20466	2.72222	234.243	179	302	199341	17.5652	2.70552	851	234.243	179	302	199341	17.5652	2.72222	360.769	194	785	307014	99.3136	2.70552	851	360.769	194	785	307014	99.3136	2.72222	1	px	Intensity	1.49745
Merged	6851.95	4517.68	-5635	-5767.1	105	287	116.46	84	174	33424	13.3974	2.70552	287	116.46	84	174	33424	13.3974	2.72222	231.683	186	278	66493	16.6604	2.70552	287	231.683	186	278	66493	16.6604	2.72222	320.885	193	538	92094	79.8619	2.70552	287	320.885	193	538	92094	79.8619	2.72222	1	px	Intensity	1.49408
Merged	6851.95	4517.68	-5635	-5767.1	182	839	113.164	92	169	94945	8.88833	2.70552	839	113.164	92	169	94945	8.88833	2.72222	219.132	169	269	183852	15.7443	2.70552	839	219.132	169	269	183852	15.7443	2.72222	325.212	176	519	272853	86.949	2.70552	839	325.212	176	519	272853	86.949	2.72222	1	px	Intensity	1.4934
Merged	6851.95	4517.68	-5635	-5767.1	507	765	113.945	88	170	87168	9.35785	2.70552	765	113.945	88	170	87168	9.35785	2.72222	219.992	165	265	168294	16.496	2.70552	765	219.992	165	265	168294	16.496	2.72222	310.714	151	543	237696	101.813	2.70552	765	310.714	151	543	237696	101.813	2.72222	1	px	Intensity	1.49195
Merged	6851.95	4517.68	-5635	-5767.1	175	693	115.475	85	172	80024	8.56554	2.70552	693	115.475	85	172	80024	8.56554	2.72222	229.405	185	293	158978	19.0884	2.70552	693	229.405	185	293	158978	19.0884	2.72222	347.866	238	518	241071	67.8777	2.70552	693	347.866	238	518	241071	67.8777	2.72222	1	px	Intensity	1.4895
Merged	6851.95	4517.68	-5635	-5767.1	523	799	116.237	72	173	92873	9.73412	2.70552	799	116.237	72	173	92873	9.73412	2.72222	239.018	182	316	190975	22.4926	2.70552	799	239.018	182	316	190975	22.4926	2.72222	295.951	167	554	236465	90.997	2.70552	799	295.951	167	554	236465	90.997	2.72222	1	px	Intensity	1.48834
Merged	6851.95	4517.68	-5635	-5767.1	304	214	132.374	103	197	28328	18.7545	2.70552	214	132.374	103	197	28328	18.7545	2.72222	274.084	207	352	58654	22.8464	2.70552	214	274.084	207	352	58654	22.8464	2.72222	322.902	209	534	69101	88.4585	2.70552	214	322.902	209	534	69101	88.4585	2.72222	1	px	Intensity	1.48821
Merged	6851.95	4517.68	-5635	-5767.1	22	322	114.348	95	170	36820	11.1339	2.70552	322	114.348	95	170	36820	11.1339	2.72222	224.516	171	275	72294	18.3966	2.70552	322	224.516	171	275	72294	18.3966	2.72222	322.037	181	626	103696	100.095	2.70552	322	322.037	181	626	103696	100.095	2.72222	1	px	Intensity	1.48669
Merged	6851.95	4517.68	-5635	-5767.1	455	859	118.566	79	176	101848	10.6118	2.70552	859	118.566	79	176	101848	10.6118	2.72222	251.459	187	320	216003	21.5987	2.70552	859	251.459	187	320	216003	21.5987	2.72222	315.998	172	530	271442	94.4299	2.70552	859	315.998	172	530	271442	94.4299	2.72222	1	px	Intensity	1.48441
Merged	6851.95	4517.68	-5635	-5767.1	287	1269	114.638	80	170	145476	7.47894	2.70552	1269	114.638	80	170	145476	7.47894	2.72222	231.074	174	292	293233	17.7446	2.70552	1269	231.074	174	292	293233	17.7446	2.72222	342.43	189	557	434544	74.1261	2.70552	1269	342.43	189	557	434544	74.1261	2.72222	1	px	Intensity	1.48293
Merged	6851.95	4517.68	-5635	-5767.1	276	1371	110.653	91	164	151705	6.34553	2.70552	1371	110.653	91	164	151705	6.34553	2.72222	213.086	171	259	292141	15.0173	2.70552	1371	213.086	171	259	292141	15.0173	2.72222	360.004	188	560	493566	74.9654	2.70552	1371	360.004	188	560	493566	74.9654	2.72222	1	px	Intensity	1.48211
Merged	6851.95	4517.68	-5635	-5767.1	458	1495	113.575	90	168	169795	8.12721	2.70552	1495	113.575	90	168	169795	8.12721	2.72222	224.785	152	293	336053	16.2857	2.70552	1495	224.785	152	293	336053	16.2857	2.72222	360.503	176	1120	538952	141.555	2.70552	1495	360.503	176	1120	538952	141.555	2.72222	1	px	Intensity	1.4792
Merged	6851.95	4517.68	-5635	-5767.1	268	334	123.075	79	182	41107	14.452	2.70552	334	123.075	79	182	41107	14.452	2.72222	275.575	202	361	92042	27.1422	2.70552	334	275.575	202	361	92042	27.1422	2.72222	314.141	167	539	104923	93.4994	2.70552	334	314.141	167	539	104923	93.4994	2.72222	1	px	Intensity	1.47877
Merged	6851.95	4517.68	-5635	-5767.1	273	1540	113.527	91	167	174831	8.2138	2.70552	1540	113.527	91	167	174831	8.2138	2.72222	237.483	181	324	365724	25.6719	2.70552	1540	237.483	181	324	365724	25.6719	2.72222	440.789	239	1299	678815	169.129	2.70552	1540	440.789	239	1299	678815	169.129	2.72222	1	px	Intensity	1.47102
Merged	6851.95	4517.68	-5635	-5767.1	202	1090	115.57	94	170	125971	8.58731	2.70552	1090	115.57	94	170	125971	8.58731	2.72222	234.631	175	298	255748	19.1906	2.70552	1090	234.631	175	298	255748	19.1906	2.72222	377.236	223	596	411187	73.5137	2.70552	1090	377.236	223	596	411187	73.5137	2.72222	1	px	Intensity	1.47097
Merged	6851.95	4517.68	-5635	-5767.1	104	1456	114.266	84	168	166372	7.94327	2.70552	1456	114.266	84	168	166372	7.94327	2.72222	226.898	163	283	330364	16.1522	2.70552	1456	226.898	163	283	330364	16.1522	2.72222	373.5	228	581	543816	63.9461	2.70552	1456	373.5	228	581	543816	63.9461	2.72222	1	px	Intensity	1.47025
Merged	6851.95	4517.68	-5635	-5767.1	85	420	112.907	95	166	47421	7.10205	2.70552	420	112.907	95	166	47421	7.10205	2.72222	225.486	186	278	94704	15.8723	2.70552	420	225.486	186	278	94704	15.8723	2.72222	318.66	180	567	133837	87.7955	2.70552	420	318.66	180	567	133837	87.7955	2.72222	1	px	Intensity	1.47023
Merged	6851.95	4517.68	-5635	-5767.1	235	703	113.587	91	167	79852	9.55141	2.70552	703	113.587	91	167	79852	9.55141	2.72222	246.909	186	315	173577	20.3738	2.70552	703	246.909	186	315	173577	20.3738	2.72222	314.781	184	520	221291	86.6836	2.70552	703	314.781	184	520	221291	86.6836	2.72222	1	px	Intensity	1.47023
Merged	6851.95	4517.68	-5635	-5767.1	247	683	115.119	98	169	78626	10.1568	2.70552	683	115.119	98	169	78626	10.1568	2.72222	232.236	181	287	158617	18.5767	2.70552	683	232.236	181	287	158617	18.5767	2.72222	319.148	180	542	217978	88.7909	2.70552	683	319.148	180	542	217978	88.7909	2.72222	1	px	Intensity	1.46805
Merged	6851.95	4517.68	-5635	-5767.1	465	563	113.789	91	167	64063	7.38482	2.70552	563	113.789	91	167	64063	7.38482	2.72222	230.474	179	286	129757	17.2091	2.70552	563	230.474	179	286	129757	17.2091	2.72222	300.217	177	521	169022	91.5565	2.70552	563	300.217	177	521	169022	91.5565	2.72222	1	px	Intensity	1.46763
Merged	6851.95	4517.68	-5635	-5767.1	269	1072	111.082	93	163	119080	7.071	2.70552	1072	111.082	93	163	119080	7.071	2.72222	214.571	158	274	230020	15.6326	2.70552	1072	214.571	158	274	230020	15.6326	2.72222	362.308	227	559	388394	75.1225	2.70552	1072	362.308	227	559	388394	75.1225	2.72222	1	px	Intensity	1.46738
Merged	6851.95	4517.68	-5635	-5767.1	445	1429	116.333	94	170	166240	7.76583	2.70552	1429	116.333	94	170	166240	7.76583	2.72222	235.613	182	310	336691	19.2765	2.70552	1429	235.613	182	310	336691	19.2765	2.72222	346.354	187	759	494940	94.2749	2.70552	1429	346.354	187	759	494940	94.2749	2.72222	1	px	Intensity	1.46132
Merged	6851.95	4517.68	-5635	-5767.1	493	598	114.488	96	167	68464	9.71409	2.70552	598	114.488	96	167	68464	9.71409	2.72222	228.538	175	302	136666	18.1493	2.70552	598	228.538	175	302	136666	18.1493	2.72222	317.975	174	588	190149	92.0949	2.70552	598	317.975	174	588	190149	92.0949	2.72222	1	px	Intensity	1.45866
Merged	6851.95	4517.68	-5635	-5767.1	351	422	126.829	99	185	53522	10.9496	2.70552	422	126.829	99	185	53522	10.9496	2.72222	248.815	199	315	105000	21.981	2.70552	422	248.815	199	315	105000	21.981	2.72222	398.46	241	549	168150	70.2294	2.70552	422	398.46	241	549	168150	70.2294	2.72222	1	px	Intensity	1.45865
Merged	6851.95	4517.68	-5635	-5767.1	510	874	113.727	95	165	99397	7.7891	2.70552	874	113.727	95	165	99397	7.7891	2.72222	222.071	173	294	194090	16.9966	2.70552	874	222.071	173	294	194090	16.9966	2.72222	325.414	185	554	284412	88.638	2.70552	874	325.414	185	554	284412	88.638	2.72222	1	px	Intensity	1.45085
Merged	6851.95	4517.68	-5635	-5767.1	296	1110	115.862	83	168	128607	9.0724	2.70552	1110	115.862	83	168	128607	9.0724	2.72222	234.568	179	288	260371	18.0096	2.70552	1110	234.568	179	288	260371	18.0096	2.72222	311.058	176	596	345274	89.4406	2.70552	1110	311.058	176	596	345274	89.4406	2.72222	1	px	Intensity	1.45
Merged	6851.95	4517.68	-5635	-5767.1	133	1023	111.576	86	161	114142	7.7659	2.70552	1023	111.576	86	161	114142	7.7659	2.72222	212.124	157	259	217003	15.6215	2.70552	1023	212.124	157	259	217003	15.6215	2.72222	357.733	197	586	365961	84.7762	2.70552	1023	357.733	197	586	365961	84.7762	2.72222	1	px	Intensity	1.44297
Merged	6851.95	4517.68	-5635	-5767.1	51	868	112.5	85	162	97650	7.14191	2.70552	868	112.5	85	162	97650	7.14191	2.72222	220.093	171	271	191041	15.0571	2.70552	868	220.093	171	271	191041	15.0571	2.72222	351.118	206	592	304770	84.5145	2.70552	868	351.118	206	592	304770	84.5145	2.72222	1	px	Intensity	1.44
Merged	6851.95	4517.68	-5635	-5767.1	557	722	112.64	79	162	81326	9.02178	2.70552	722	112.64	79	162	81326	9.02178	2.72222	221.374	161	287	159832	22.335	2.70552	722	221.374	161	287	159832	22.335	2.72222	376.888	230	582	272113	67.3156	2.70552	722	376.888	230	582	272113	67.3156	2.72222	1	px	Intensity	1.43821
Merged	6851.95	4517.68	-5635	-5767.1	479	324	115.602	99	166	37455	11.7338	2.70552	324	115.602	99	166	37455	11.7338	2.72222	229.571	178	277	74381	17.4269	2.70552	324	229.571	178	277	74381	17.4269	2.72222	301.858	181	533	97802	91.2286	2.70552	324	301.858	181	533	97802	91.2286	2.72222	1	px	Intensity	1.43596
Merged	6851.95	4517.68	-5635	-5767.1	45	1146	113.759	88	163	130368	7.72378	2.70552	1146	113.759	88	163	130368	7.72378	2.72222	224.553	172	276	257338	16.2603	2.70552	1146	224.553	172	276	257338	16.2603	2.72222	361.315	200	576	414067	82.9224	2.70552	1146	361.315	200	576	414067	82.9224	2.72222	1	px	Intensity	1.43285
Merged	6851.95	4517.68	-5635	-5767.1	223	892	114.926	76	164	102514	8.44451	2.70552	892	114.926	76	164	102514	8.44451	2.72222	227.174	178	287	202639	15.9707	2.70552	892	227.174	178	287	202639	15.9707	2.72222	315.715	177	580	281618	87.934	2.70552	892	315.715	177	580	281618	87.934	2.72222	1	px	Intensity	1.42701
Merged	6851.95	4517.68	-5635	-5767.1	282	728	114.53	85	163	83378	9.89143	2.70552	728	114.53	85	163	83378	9.89143	2.72222	229.412	161	302	167012	22.3369	2.70552	728	229.412	161	302	167012	22.3369	2.72222	306.361	165	548	223031	96.5045	2.70552	728	306.361	165	548	223031	96.5045	2.72222	1	px	Intensity	1.42321
Merged	6851.95	4517.68	-5635	-5767.1	462	442	115.971	100	165	51259	10.4977	2.70552	442	115.971	100	165	51259	10.4977	2.72222	240.627	178	306	106357	20.3527	2.70552	442	240.627	178	306	106357	20.3527	2.72222	337.348	203	544	149108	84.6378	2.70552	442	337.348	203	544	149108	84.6378	2.72222	1	px	Intensity	1.42277
Merged	6851.95	4517.68	-5635	-5767.1	64	643	113.575	97	161	73029	10.0062	2.70552	643	113.575	97	161	73029	10.0062	2.72222	219.098	170	264	140880	15.7872	2.70552	643	219.098	170	264	140880	15.7872	2.72222	340.624	225	521	219021	70.4351	2.70552	643	340.624	225	521	219021	70.4351	2.72222	1	px	Intensity	1.41756
Merged	6851.95	4517.68	-5635	-5767.1	386	689	119.337	82	169	82223	9.97985	2.70552	689	119.337	82	169	82223	9.97985	2.72222	242.351	191	317	166980	20.475	2.70552	689	242.351	191	317	166980	20.475	2.72222	381.457	205	565	262824	82.918	2.70552	689	381.457	205	565	262824	82.918	2.72222	1	px	Intensity	1.41616
Merged	6851.95	4517.68	-5635	-5767.1	253	1537	114.621	91	162	176173	7.71468	2.70552	1537	114.621	91	162	176173	7.71468	2.72222	235.481	178	302	361935	16.8832	2.70552	1537	235.481	178	302	361935	16.8832	2.72222	358.269	178	890	550659	114.705	2.70552	1537	358.269	178	890	550659	114.705	2.72222	1	px	Intensity	1.41335
Merged	6851.95	4517.68	-5635	-5767.1	439	814	114.143	94	161	92912	7.29993	2.70552	814	114.143	94	161	92912	7.29993	2.72222	225.505	177	279	183561	16.0617	2.70552	814	225.505	177	279	183561	16.0617	2.72222	313.122	176	529	254881	88.8445	2.70552	814	313.122	176	529	254881	88.8445	2.72222	1	px	Intensity	1.41052
Merged	6851.95	4517.68	-5635	-5767.1	49	582	116.423	96	164	67758	10.0149	2.70552	582	116.423	96	164	67758	10.0149	2.72222	239.93	192	285	139639	16.8156	2.70552	582	239.93	192	285	139639	16.8156	2.72222	385.955	218	625	224626	82.43	2.70552	582	385.955	218	625	224626	82.43	2.72222	1	px	Intensity	1.40866
Merged	6851.95	4517.68	-5635	-5767.1	185	596	113.012	91	159	67355	7.73402	2.70552	596	113.012	91	159	67355	7.73402	2.72222	228.054	179	285	135920	17.1807	2.70552	596	228.054	179	285	135920	17.1807	2.72222	339.136	230	561	202125	71.9362	2.70552	596	339.136	230	561	202125	71.9362	2.72222	1	px	Intensity	1.40693
Merged	6851.95	4517.68	-5635	-5767.1	319	1137	114.449	90	161	130128	7.75392	2.70552	1137	114.449	90	161	130128	7.75392	2.72222	227.811	173	287	259021	17.4	2.70552	1137	227.811	173	287	259021	17.4	2.72222	321.77	165	550	365853	97.0645	2.70552	1137	321.77	165	550	365853	97.0645	2.72222	1	px	Intensity	1.40675
Merged	6851.95	4517.68	-5635	-5767.1	61	442	112.552	98	158	49748	7.75211	2.70552	442	112.552	98	158	49748	7.75211	2.72222	219.756	168	262	97132	16.7612	2.70552	442	219.756	168	262	97132	16.7612	2.72222	312.036	170	521	137920	100.167	2.70552	442	312.036	170	521	137920	100.167	2.72222	1	px	Intensity	1.4038
Merged	6851.95	4517.68	-5635	-5767.1	344	1500	122.594	90	172	183891	11.2216	2.70552	1500	122.594	90	172	183891	11.2216	2.72222	248.199	191	322	372298	18.067	2.70552	1500	248.199	191	322	372298	18.067	2.72222	387.943	171	1012	581915	120.398	2.70552	1500	387.943	171	1012	581915	120.398	2.72222	1	px	Intensity	1.40301
Merged	6851.95	4517.68	-5635	-5767.1	246	575	112.134	93	157	64477	6.48893	2.70552	575	112.134	93	157	64477	6.48893	2.72222	236.123	178	299	135771	18.1423	2.70552	575	236.123	178	299	135771	18.1423	2.72222	323.974	225	550	186285	76.8653	2.70552	575	323.974	225	550	186285	76.8653	2.72222	1	px	Intensity	1.40011
Merged	6851.95	4517.68	-5635	-5767.1	186	737	115.123	92	161	84846	7.54425	2.70552	737	115.123	92	161	84846	7.54425	2.72222	236.982	177	288	174656	17.2494	2.70552	737	236.982	177	288	174656	17.2494	2.72222	344.25	199	520	253712	75.1136	2.70552	737	344.25	199	520	253712	75.1136	2.72222	1	px	Intensity	1.3985
Merged	6851.95	4517.68	-5635	-5767.1	473	309	115.126	95	161	35574	7.70415	2.70552	309	115.126	95	161	35574	7.70415	2.72222	217.43	180	264	67186	15.3161	2.70552	309	217.43	180	264	67186	15.3161	2.72222	312.521	179	530	96569	100.086	2.70552	309	312.521	179	530	96569	100.086	2.72222	1	px	Intensity	1.39847
Merged	6851.95	4517.68	-5635	-5767.1	194	958	108.773	83	152	104205	5.7913	2.70552	958	108.773	83	152	104205	5.7913	2.72222	201.772	144	249	193298	14.7756	2.70552	958	201.772	144	249	193298	14.7756	2.72222	341.061	170	547	326736	97.3112	2.70552	958	341.061	170	547	326736	97.3112	2.72222	1	px	Intensity	1.3974
Merged	6851.95	4517.68	-5635	-5767.1	217	1912	113.881	89	159	217741	7.24816	2.70552	1912	113.881	89	159	217741	7.24816	2.72222	226.063	174	290	432232	16.4181	2.70552	1912	226.063	174	290	432232	16.4181	2.72222	410.601	201	1217	785069	167.373	2.70552	1912	410.601	201	1217	785069	167.373	2.72222	1	px	Intensity	1.39619
Merged	6851.95	4517.68	-5635	-5767.1	376	869	113.884	96	159	98965	7.25998	2.70552	869	113.884	96	159	98965	7.25998	2.72222	227.948	183	292	198087	15.886	2.70552	869	227.948	183	292	198087	15.886	2.72222	299.675	182	561	260418	93.3717	2.70552	869	299.675	182	561	260418	93.3717	2.72222	1	px	Intensity	1.39616
Merged	6851.95	4517.68	-5635	-5767.1	119	1349	114.42	94	159	154352	7.64858	2.70552	1349	114.42	94	159	154352	7.64858	2.72222	228.527	174	288	308283	18.1229	2.70552	1349	228.527	174	288	308283	18.1229	2.72222	346.379	229	585	467265	67.1083	2.70552	1349	346.379	229	585	467265	67.1083	2.72222	1	px	Intensity	1.38962
Merged	6851.95	4517.68	-5635	-5767.1	121	1120	113.816	89	158	127474	8.14837	2.70552	1120	113.816	89	158	127474	8.14837	2.72222	224.076	151	277	250965	15.9946	2.70552	1120	224.076	151	277	250965	15.9946	2.72222	351.205	188	548	393350	87.0736	2.70552	1120	351.205	188	548	393350	87.0736	2.72222	1	px	Intensity	1.3882
Merged	6851.95	4517.68	-5635	-5767.1	407	1836	113.864	88	158	209055	7.5322	2.70552	1836	113.864	88	158	209055	7.5322	2.72222	231.443	169	314	424929	19.6583	2.70552	1836	231.443	169	314	424929	19.6583	2.72222	377.472	214	1264	693038	148.977	2.70552	1836	377.472	214	1264	693038	148.977	2.72222	1	px	Intensity	1.38762
Merged	6851.95	4517.68	-5635	-5767.1	132	308	116.867	90	162	35995	11.118	2.70552	308	116.867	90	162	35995	11.118	2.72222	239.214	174	297	73678	23.1934	2.70552	308	239.214	174	297	73678	23.1934	2.72222	328.279	203	565	101110	87.0646	2.70552	308	328.279	203	565	101110	87.0646	2.72222	1	px	Intensity	1.38619
Merged	6851.95	4517.68	-5635	-5767.1	400	1060	114.342	86	158	121203	8.07244	2.70552	1060	114.342	86	158	121203	8.07244	2.72222	227.579	184	275	241234	16.1115	2.70552	1060	227.579	184	275	241234	16.1115	2.72222	344.68	179	800	365361	96.9612	2.70552	1060	344.68	179	800	365361	96.9612	2.72222	1	px	Intensity	1.38181
Merged	6851.95	4517.68	-5635	-5767.1	21	1288	112.943	82	156	145470	6.85968	2.70552	1288	112.943	82	156	145470	6.85968	2.72222	220.653	160	276	284201	16.6379	2.70552	1288	220.653	160	276	284201	16.6379	2.72222	370.327	204	738	476981	99.4738	2.70552	1288	370.327	204	738	476981	99.4738	2.72222	1	px	Intensity	1.38123
Merged	6851.95	4517.68	-5635	-5767.1	29	651	115.3	94	159	75060	8.16032	2.70552	651	115.3	94	159	75060	8.16032	2.72222	231.295	174	304	150573	19.5458	2.70552	651	231.295	174	304	150573	19.5458	2.72222	328.028	208	532	213546	72.6942	2.70552	651	328.028	208	532	213546	72.6942	2.72222	1	px	Intensity	1.37902
Merged	6851.95	4517.68	-5635	-5767.1	343	1562	120.008	94	165	187452	9.61081	2.70552	1562	120.008	94	165	187452	9.61081	2.72222	246.35	190	310	384798	18.3459	2.70552	1562	246.35	190	310	384798	18.3459	2.72222	365.331	185	791	570647	87.6641	2.70552	1562	365.331	185	791	570647	87.6641	2.72222	1	px	Intensity	1.37491
Merged	6851.95	4517.68	-5635	-5767.1	1	27263	107.714	80	148	2936595	4.66946	2.70552	0	N/A	N/A	N/A	N/A	N/A	N/A	208.615	144	275	5687474	14.4754	2.70552	0	N/A	N/A	N/A	N/A	N/A	N/A	554.222	430	693	15109752	32.848	2.70552	0	N/A	N/A	N/A	N/A	N/A	N/A	0	px	Intensity	1.37401
Merged	6851.95	4517.68	-5635	-5767.1	266	824	117.941	96	162	97183	8.34013	2.70552	824	117.941	96	162	97183	8.34013	2.72222	245.567	186	328	202347	21.3159	2.70552	824	245.567	186	328	202347	21.3159	2.72222	372.079	174	774	306593	107.429	2.70552	824	372.079	174	774	306593	107.429	2.72222	1	px	Intensity	1.37357
Merged	6851.95	4517.68	-5635	-5767.1	128	349	120.149	89	165	41932	12.1155	2.70552	349	120.149	89	165	41932	12.1155	2.72222	247.759	194	307	86468	21.2055	2.70552	349	247.759	194	307	86468	21.2055	2.72222	309.355	168	517	107965	89.6023	2.70552	349	309.355	168	517	107965	89.6023	2.72222	1	px	Intensity	1.37329
Merged	6851.95	4517.68	-5635	-5767.1	250	308	115.088	85	158	35447	9.21848	2.70552	308	115.088	85	158	35447	9.21848	2.72222	226.266	158	275	69690	18.7637	2.70552	308	226.266	158	275	69690	18.7637	2.72222	309.312	157	526	95268	105.873	2.70552	308	309.312	157	526	95268	105.873	2.72222	1	px	Intensity	1.37287
Merged	6851.95	4517.68	-5635	-5767.1	323	1183	121.025	96	166	143173	8.6496	2.70552	1183	121.025	96	166	143173	8.6496	2.72222	252.034	195	308	298156	18.1375	2.70552	1183	252.034	195	308	298156	18.1375	2.72222	355.495	183	558	420551	88.3789	2.70552	1183	355.495	183	558	420551	88.3789	2.72222	1	px	Intensity	1.37161
Merged	6851.95	4517.68	-5635	-5767.1	31	841	113.049	93	155	95074	8.89496	2.70552	841	113.049	93	155	95074	8.89496	2.72222	214.98	153	268	180798	16.5646	2.70552	841	214.98	153	268	180798	16.5646	2.72222	332.491	174	631	279625	97.5565	2.70552	841	332.491	174	631	279625	97.5565	2.72222	1	px	Intensity	1.37109
Merged	6851.95	4517.68	-5635	-5767.1	97	1860	115.339	91	158	214530	7.14263	2.70552	1860	115.339	91	158	214530	7.14263	2.72222	236.862	182	309	440564	18.8262	2.70552	1860	236.862	182	309	440564	18.8262	2.72222	401.612	194	1310	746999	180.84	2.70552	1860	401.612	194	1310	746999	180.84	2.72222	1	px	Intensity	1.36988
Merged	6851.95	4517.68	-5635	-5767.1	498	954	113.291	96	155	108080	7.10586	2.70552	954	113.291	96	155	108080	7.10586	2.72222	218.471	172	271	208421	15.531	2.70552	954	218.471	172	271	208421	15.531	2.72222	325.963	173	556	310969	85.0912	2.70552	954	325.963	173	556	310969	85.0912	2.72222	1	px	Intensity	1.36815
Merged	6851.95	4517.68	-5635	-5767.1	347	567	112.681	89	154	63890	8.51023	2.70552	567	112.681	89	154	63890	8.51023	2.72222	223.291	175	280	126606	16.6117	2.70552	567	223.291	175	280	126606	16.6117	2.72222	303.649	161	544	172169	100.724	2.70552	567	303.649	161	544	172169	100.724	2.72222	1	px	Intensity	1.36669
Merged	6851.95	4517.68	-5635	-5767.1	195	1226	112.945	95	154	138470	7.36317	2.70552	1226	112.945	95	154	138470	7.36317	2.72222	219.465	164	274	269064	15.4475	2.70552	1226	219.465	164	274	269064	15.4475	2.72222	337.35	212	648	413591	79.3618	2.70552	1226	337.35	212	648	413591	79.3618	2.72222	1	px	Intensity	1.3635
Merged	6851.95	4517.68	-5635	-5767.1	270	902	119.131	95	162	107456	9.09061	2.70552	902	119.131	95	162	107456	9.09061	2.72222	254.545	195	335	229600	23.0526	2.70552	902	254.545	195	335	229600	23.0526	2.72222	332.865	161	619	300244	85.4461	2.70552	902	332.865	161	619	300244	85.4461	2.72222	1	px	Intensity	1.35985
Merged	6851.95	4517.68	-5635	-5767.1	150	373	114.727	98	156	42793	7.97088	2.70552	373	114.727	98	156	42793	7.97088	2.72222	251.198	183	313	93697	23.998	2.70552	373	251.198	183	313	93697	23.998	2.72222	314.646	189	524	117363	89.0423	2.70552	373	314.646	189	524	117363	89.0423	2.72222	1	px	Intensity	1.35976
Merged	6851.95	4517.68	-5635	-5767.1	154	536	110.368	95	150	59157	6.63663	2.70552	536	110.368	95	150	59157	6.63663	2.72222	208.864	171	257	111951	15.4394	2.70552	536	208.864	171	257	111951	15.4394	2.72222	361.256	248	550	193633	67.0479	2.70552	536	361.256	248	550	193633	67.0479	2.72222	1	px	Intensity	1.3591
Merged	6851.95	4517.68	-5635	-5767.1	477	1211	113.508	94	154	137458	6.77886	2.70552	1211	113.508	94	154	137458	6.77886	2.72222	230.091	177	283	278640	16.3261	2.70552	1211	230.091	177	283	278640	16.3261	2.72222	446.164	240	1092	540305	143.313	2.70552	1211	446.164	240	1092	540305	143.313	2.72222	1	px	Intensity	1.35673
Merged	6851.95	4517.68	-5635	-5767.1	140	1209	115.082	99	156	139134	7.16377	2.70552	1209	115.082	99	156	139134	7.16377	2.72222	227.172	176	279	274651	16.6113	2.70552	1209	227.172	176	279	274651	16.6113	2.72222	358.428	219	750	433339	77.284	2.70552	1209	358.428	219	750	433339	77.284	2.72222	1	px	Intensity	1.35556
Merged	6851.95	4517.68	-5635	-5767.1	19	1081	112.914	83	153	122060	7.13864	2.70552	1081	112.914	83	153	122060	7.13864	2.72222	216.502	158	295	234039	18.6638	2.70552	1081	216.502	158	295	234039	18.6638	2.72222	382.643	189	921	413637	116.316	2.70552	1081	382.643	189	921	413637	116.316	2.72222	1	px	Intensity	1.35501
Merged	6851.95	4517.68	-5635	-5767.1	48	1643	114.45	92	155	188042	7.37089	2.70552	1643	114.45	92	155	188042	7.37089	2.72222	225.508	174	282	370510	16.1952	2.70552	1643	225.508	174	282	370510	16.1952	2.72222	371.631	186	940	610589	130.097	2.70552	1643	371.631	186	940	610589	130.097	2.72222	1	px	Intensity	1.3543
Merged	6851.95	4517.68	-5635	-5767.1	145	546	114.485	70	155	62509	7.71059	2.70552	546	114.485	70	155	62509	7.71059	2.72222	232.397	178	278	126889	18.39	2.70552	546	232.397	178	278	126889	18.39	2.72222	347.108	248	542	189521	68.5069	2.70552	546	347.108	248	542	189521	68.5069	2.72222	1	px	Intensity	1.35389
Merged	6851.95	4517.68	-5635	-5767.1	94	758	113.112	88	153	85739	8.02621	2.70552	758	113.112	88	153	85739	8.02621	2.72222	221.145	181	273	167628	15.6576	2.70552	758	221.145	181	273	167628	15.6576	2.72222	365.672	212	534	277179	77.1238	2.70552	758	365.672	212	534	277179	77.1238	2.72222	1	px	Intensity	1.35264
Merged	6851.95	4517.68	-5635	-5767.1	212	907	114.603	88	155	103945	7.76511	2.70552	907	114.603	88	155	103945	7.76511	2.72222	228.938	179	280	207647	18.0068	2.70552	907	228.938	179	280	207647	18.0068	2.72222	341.483	219	569	309725	73.6582	2.70552	907	341.483	219	569	309725	73.6582	2.72222	1	px	Intensity	1.35249
Merged	6851.95	4517.68	-5635	-5767.1	375	495	112.511	91	152	55693	6.57747	2.70552	495	112.511	91	152	55693	6.57747	2.72222	222.58	178	278	110177	16.0343	2.70552	495	222.58	178	278	110177	16.0343	2.72222	316.515	192	553	156675	89.4085	2.70552	495	316.515	192	553	156675	89.4085	2.72222	1	px	Intensity	1.35098
Merged	6851.95	4517.68	-5635	-5767.1	115	687	111.1	95	150	76326	7.08127	2.70552	687	111.1	95	150	76326	7.08127	2.72222	217.533	169	272	149445	16.0115	2.70552	687	217.533	169	272	149445	16.0115	2.72222	333.402	157	552	229047	98.7599	2.70552	687	333.402	157	552	229047	98.7599	2.72222	1	px	Intensity	1.35013
Merged	6851.95	4517.68	-5635	-5767.1	384	2359	113.464	94	153	267662	7.16233	2.70552	2359	113.464	94	153	267662	7.16233	2.72222	223.474	175	277	527174	17.5601	2.70552	2359	223.474	175	277	527174	17.5601	2.72222	366.201	145	1010	863867	127.098	2.70552	2359	366.201	145	1010	863867	127.098	2.72222	1	px	Intensity	1.34844
Merged	6851.95	4517.68	-5635	-5767.1	243	578	112.761	95	152	65176	7.37566	2.70552	578	112.761	95	152	65176	7.37566	2.72222	227.701	174	296	131611	19.3233	2.70552	578	227.701	174	296	131611	19.3233	2.72222	351.081	231	548	202925	72.805	2.70552	578	351.081	231	548	202925	72.805	2.72222	1	px	Intensity	1.34798
Merged	6851.95	4517.68	-5635	-5767.1	548	374	115.019	90	155	43017	8.27315	2.70552	374	115.019	90	155	43017	8.27315	2.72222	233.222	171	295	87225	19.9316	2.70552	374	233.222	171	295	87225	19.9316	2.72222	328.995	203	531	123044	87.8309	2.70552	374	328.995	203	531	123044	87.8309	2.72222	1	px	Intensity	1.34761
Merged	6851.95	4517.68	-5635	-5767.1	263	818	112.221	95	151	91797	6.72051	2.70552	818	112.221	95	151	91797	6.72051	2.72222	225.463	175	279	184429	16.7679	2.70552	818	225.463	175	279	184429	16.7679	2.72222	335.658	222	523	274568	65.6346	2.70552	818	335.658	222	523	274568	65.6346	2.72222	1	px	Intensity	1.34556
Merged	6851.95	4517.68	-5635	-5767.1	509	538	112.351	71	151	60445	6.97508	2.70552	538	112.351	71	151	60445	6.97508	2.72222	221.764	172	284	119309	16.9527	2.70552	538	221.764	172	284	119309	16.9527	2.72222	343.411	204	556	184755	80.751	2.70552	538	343.411	204	556	184755	80.751	2.72222	1	px	Intensity	1.344
Merged	6851.95	4517.68	-5635	-5767.1	371	2801	113.211	88	152	317103	6.9905	2.70552	2801	113.211	88	152	317103	6.9905	2.72222	224.448	171	288	628680	16.8982	2.70552	2801	224.448	171	288	628680	16.8982	2.72222	429.062	239	1208	1201804	128.507	2.70552	2801	429.062	239	1208	1201804	128.507	2.72222	1	px	Intensity	1.34263
Merged	6851.95	4517.68	-5635	-5767.1	113	508	111.728	91	150	56758	6.89253	2.70552	508	111.728	91	150	56758	6.89253	2.72222	214.709	167	258	109072	15.357	2.70552	508	214.709	167	258	109072	15.357	2.72222	366.811	256	535	186340	69.7236	2.70552	508	366.811	256	535	186340	69.7236	2.72222	1	px	Intensity	1.34254
Merged	6851.95	4517.68	-5635	-5767.1	428	1290	114.177	85	153	147288	7.23291	2.70552	1290	114.177	85	153	147288	7.23291	2.72222	226.709	164	288	292454	16.8653	2.70552	1290	226.709	164	288	292454	16.8653	2.72222	325.284	188	739	419616	94.9175	2.70552	1290	325.284	188	739	419616	94.9175	2.72222	1	px	Intensity	1.34003
Merged	6851.95	4517.68	-5635	-5767.1	283	1411	114.209	83	153	161149	7.12642	2.70552	1411	114.209	83	153	161149	7.12642	2.72222	224.307	179	283	316497	15.934	2.70552	1411	224.307	179	283	316497	15.934	2.72222	362.97	177	553	512150	84.0143	2.70552	1411	362.97	177	553	512150	84.0143	2.72222	1	px	Intensity	1.33965
Merged	6851.95	4517.68	-5635	-5767.1	346	1684	115.216	83	154	194024	7.38332	2.70552	1684	115.216	83	154	194024	7.38332	2.72222	234.1	183	300	394224	17.0877	2.70552	1684	234.1	183	300	394224	17.0877	2.72222	369.474	200	1015	622194	120.699	2.70552	1684	369.474	200	1015	622194	120.699	2.72222	1	px	Intensity	1.33662
Merged	6851.95	4517.68	-5635	-5767.1	144	1369	113.809	77	152	155804	7.6937	2.70552	1369	113.809	77	152	155804	7.6937	2.72222	232.192	167	302	317871	20.4328	2.70552	1369	232.192	167	302	317871	20.4328	2.72222	364.039	238	677	498369	68.6225	2.70552	1369	364.039	238	677	498369	68.6225	2.72222	1	px	Intensity	1.33558
Merged	6851.95	4517.68	-5635	-5767.1	570	497	110.873	91	148	55104	7.05594	2.70552	497	110.873	91	148	55104	7.05594	2.72222	211.934	171	257	105331	16.2133	2.70552	497	211.934	171	257	105331	16.2133	2.72222	315.04	176	530	156575	89.5771	2.70552	497	315.04	176	530	156575	89.5771	2.72222	1	px	Intensity	1.33486
Merged	6851.95	4517.68	-5635	-5767.1	55	850	109.402	88	146	92992	6.10123	2.70552	850	109.402	88	146	92992	6.10123	2.72222	207.486	161	257	176363	14.4661	2.70552	850	207.486	161	257	176363	14.4661	2.72222	383.353	221	580	325850	79.6214	2.70552	850	383.353	221	580	325850	79.6214	2.72222	1	px	Intensity	1.33452
Merged	6851.95	4517.68	-5635	-5767.1	171	470	112.402	87	150	52829	6.94879	2.70552	470	112.402	87	150	52829	6.94879	2.72222	215.166	169	264	101128	15.0609	2.70552	470	215.166	169	264	101128	15.0609	2.72222	362.074	236	548	170175	73.3482	2.70552	470	362.074	236	548	170175	73.3482	2.72222	1	px	Intensity	1.33449
Merged	6851.95	4517.68	-5635	-5767.1	499	1849	114.959	82	153	212560	7.30656	2.70552	1849	114.959	82	153	212560	7.30656	2.72222	234.574	171	296	433728	19.1913	2.70552	1849	234.574	171	296	433728	19.1913	2.72222	372.952	235	716	689589	76.3057	2.70552	1849	372.952	235	716	689589	76.3057	2.72222	1	px	Intensity	1.3309
Merged	6851.95	4517.68	-5635	-5767.1	503	608	115.766	75	154	70386	7.73532	2.70552	608	115.766	75	154	70386	7.73532	2.72222	231.964	180	279	141034	16.3112	2.70552	608	231.964	180	279	141034	16.3112	2.72222	372.77	175	582	226644	82.3036	2.70552	608	372.77	175	582	226644	82.3036	2.72222	1	px	Intensity	1.33026
Merged	6851.95	4517.68	-5635	-5767.1	209	456	113.706	95	151	51850	7.09341	2.70552	456	113.706	95	151	51850	7.09341	2.72222	226.836	182	273	103437	15.557	2.70552	456	226.836	182	273	103437	15.557	2.72222	309.237	171	551	141012	92.414	2.70552	456	309.237	171	551	141012	92.414	2.72222	1	px	Intensity	1.32798
Merged	6851.95	4517.68	-5635	-5767.1	299	515	110.027	93	146	56664	6.64014	2.70552	515	110.027	93	146	56664	6.64014	2.72222	206.814	166	257	106509	14.5969	2.70552	515	206.814	166	257	106509	14.5969	2.72222	308.417	146	575	158835	104.312	2.70552	515	308.417	146	575	158835	104.312	2.72222	1	px	Intensity	1.32694
Merged	6851.95	4517.68	-5635	-5767.1	451	1690	112.472	71	149	190078	6.97857	2.70552	1690	112.472	71	149	190078	6.97857	2.72222	226.653	173	325	383044	19.658	2.70552	1690	226.653	173	325	383044	19.658	2.72222	384.22	182	1038	649332	112.755	2.70552	1690	384.22	182	1038	649332	112.755	2.72222	1	px	Intensity	1.32477
Merged	6851.95	4517.68	-5635	-5767.1	155	1003	114.101	86	151	114443	7.35132	2.70552	1003	114.101	86	151	114443	7.35132	2.72222	229.592	180	299	230281	19.9066	2.70552	1003	229.592	180	299	230281	19.9066	2.72222	312.834	165	536	313772	93.9017	2.70552	1003	312.834	165	536	313772	93.9017	2.72222	1	px	Intensity	1.32339
Merged	6851.95	4517.68	-5635	-5767.1	394	973	114.199	87	151	111116	7.24973	2.70552	973	114.199	87	151	111116	7.24973	2.72222	231.456	177	285	225207	17.2976	2.70552	973	231.456	177	285	225207	17.2976	2.72222	332.705	194	534	323722	72.596	2.70552	973	332.705	194	534	323722	72.596	2.72222	1	px	Intensity	1.32225
Merged	6851.95	4517.68	-5635	-5767.1	259	756	116.718	96	154	88239	7.9728	2.70552	756	116.718	96	154	88239	7.9728	2.72222	237.034	180	302	179198	17.7605	2.70552	756	237.034	180	302	179198	17.7605	2.72222	353.503	186	559	267248	87.1757	2.70552	756	353.503	186	559	267248	87.1757	2.72222	1	px	Intensity	1.31942
Merged	6851.95	4517.68	-5635	-5767.1	93	820	116.856	94	154	95822	8.34292	2.70552	820	116.856	94	154	95822	8.34292	2.72222	246.741	188	332	202328	23.6291	2.70552	820	246.741	188	332	202328	23.6291	2.72222	329.017	202	546	269794	69.6335	2.70552	820	329.017	202	546	269794	69.6335	2.72222	1	px	Intensity	1.31786
Merged	6851.95	4517.68	-5635	-5767.1	379	645	110.808	79	146	71471	6.45529	2.70552	645	110.808	79	146	71471	6.45529	2.72222	227.053	177	287	146449	19.6649	2.70552	645	227.053	177	287	146449	19.6649	2.72222	369.709	240	525	238462	65.5151	2.70552	645	369.709	240	525	238462	65.5151	2.72222	1	px	Intensity	1.3176
Merged	6851.95	4517.68	-5635	-5767.1	25	786	113.09	87	149	88889	7.07449	2.70552	786	113.09	87	149	88889	7.07449	2.72222	221.379	179	276	174004	16.1633	2.70552	786	221.379	179	276	174004	16.1633	2.72222	330.286	176	571	259605	86.2424	2.70552	786	330.286	176	571	259605	86.2424	2.72222	1	px	Intensity	1.31753
Merged	6851.95	4517.68	-5635	-5767.1	422	1146	110.966	93	146	127167	6.11005	2.70552	1146	110.966	93	146	127167	6.11005	2.72222	210.365	170	262	241078	14.7162	2.70552	1146	210.365	170	262	241078	14.7162	2.72222	315.907	162	635	362029	88.2838	2.70552	1146	315.907	162	635	362029	88.2838	2.72222	1	px	Intensity	1.31572
Merged	6851.95	4517.68	-5635	-5767.1	399	926	110.976	89	146	102764	6.22167	2.70552	926	110.976	89	146	102764	6.22167	2.72222	229.129	167	284	212173	17.6855	2.70552	926	229.129	167	284	212173	17.6855	2.72222	351.281	230	552	325286	68.9409	2.70552	926	351.281	230	552	325286	68.9409	2.72222	1	px	Intensity	1.3156
Merged	6851.95	4517.68	-5635	-5767.1	334	669	107.193	94	141	71712	4.52074	2.70552	669	107.193	94	141	71712	4.52074	2.72222	205.01	167	246	137152	14.076	2.70552	669	205.01	167	246	137152	14.076	2.72222	508.707	434	630	340325	26.9277	2.70552	669	508.707	434	630	340325	26.9277	2.72222	1	px	Intensity	1.31539
Merged	6851.95	4517.68	-5635	-5767.1	328	330	118.718	101	156	39177	7.87401	2.70552	330	118.718	101	156	39177	7.87401	2.72222	246.176	198	296	81238	19.4938	2.70552	330	246.176	198	296	81238	19.4938	2.72222	318.088	168	547	104969	90.5872	2.70552	330	318.088	168	547	104969	90.5872	2.72222	1	px	Intensity	1.31404
Merged	6851.95	4517.68	-5635	-5767.1	200	480	111.283	84	146	53416	6.64363	2.70552	480	111.283	84	146	53416	6.64363	2.72222	222.094	182	281	106605	15.5665	2.70552	480	222.094	182	281	106605	15.5665	2.72222	304.827	183	519	146317	90.9441	2.70552	480	304.827	183	519	146317	90.9441	2.72222	1	px	Intensity	1.31197
Merged	6851.95	4517.68	-5635	-5767.1	449	1149	114.397	75	150	131442	7.55087	2.70552	1149	114.397	75	150	131442	7.55087	2.72222	233.433	185	292	268215	16.9883	2.70552	1149	233.433	185	292	268215	16.9883	2.72222	344.439	210	540	395760	73.6923	2.70552	1149	344.439	210	540	395760	73.6923	2.72222	1	px	Intensity	1.31122
Merged	6851.95	4517.68	-5635	-5767.1	33	608	109.112	89	143	66340	6.20915	2.70552	608	109.112	89	143	66340	6.20915	2.72222	202.872	166	245	123346	13.8873	2.70552	608	202.872	166	245	123346	13.8873	2.72222	341.936	178	524	207897	93.4033	2.70552	608	341.936	178	524	207897	93.4033	2.72222	1	px	Intensity	1.31058
Merged	6851.95	4517.68	-5635	-5767.1	446	1149	114.497	89	150	131557	7.30901	2.70552	1149	114.497	89	150	131557	7.30901	2.72222	228.304	175	289	262321	17.1422	2.70552	1149	228.304	175	289	262321	17.1422	2.72222	314.752	173	538	361650	90.7919	2.70552	1149	314.752	173	538	361650	90.7919	2.72222	1	px	Intensity	1.31008
Merged	6851.95	4517.68	-5635	-5767.1	191	738	115.276	85	151	85074	7.70408	2.70552	738	115.276	85	151	85074	7.70408	2.72222	237.127	188	303	175000	18.719	2.70552	738	237.127	188	303	175000	18.719	2.72222	316.871	194	536	233851	80.2041	2.70552	738	316.871	194	536	233851	80.2041	2.72222	1	px	Intensity	1.30989
Merged	6851.95	4517.68	-5635	-5767.1	476	732	112.235	97	147	82156	7.19686	2.70552	732	112.235	97	147	82156	7.19686	2.72222	223.284	181	273	163444	16.8172	2.70552	732	223.284	181	273	163444	16.8172	2.72222	314.007	154	573	229853	99.4745	2.70552	732	314.007	154	573	229853	99.4745	2.72222	1	px	Intensity	1.30975
Merged	6851.95	4517.68	-5635	-5767.1	336	723	108.498	95	142	78444	4.84282	2.70552	723	108.498	95	142	78444	4.84282	2.72222	213.58	167	262	154418	14.0417	2.70552	723	213.58	167	262	154418	14.0417	2.72222	502.025	425	597	362964	26.3762	2.70552	723	502.025	425	597	362964	26.3762	2.72222	1	px	Intensity	1.30878
Merged	6851.95	4517.68	-5635	-5767.1	397	589	111.579	97	146	65720	6.11275	2.70552	589	111.579	97	146	65720	6.11275	2.72222	216.114	174	264	127291	14.1772	2.70552	589	216.114	174	264	127291	14.1772	2.72222	310.438	173	553	182848	97.4715	2.70552	589	310.438	173	553	182848	97.4715	2.72222	1	px	Intensity	1.30849
Merged	6851.95	4517.68	-5635	-5767.1	349	1229	111.838	87	146	137449	6.40846	2.70552	1229	111.838	87	146	137449	6.40846	2.72222	224.151	175	274	275482	16.148	2.70552	1229	224.151	175	274	275482	16.148	2.72222	323.343	178	531	397389	85.6462	2.70552	1229	323.343	178	531	397389	85.6462	2.72222	1	px	Intensity	1.30546
Merged	6851.95	4517.68	-5635	-5767.1	339	1201	108.071	93	141	129793	4.55851	2.70552	1201	108.071	93	141	129793	4.55851	2.72222	212.687	167	260	255437	15.0783	2.70552	1201	212.687	167	260	255437	15.0783	2.72222	491.463	387	601	590247	31.8779	2.70552	1201	491.463	387	601	590247	31.8779	2.72222	1	px	Intensity	1.3047
Merged	6851.95	4517.68	-5635	-5767.1	280	949	113.507	80	148	107718	7.49156	2.70552	949	113.507	80	148	107718	7.49156	2.72222	230.531	156	305	218774	21.7924	2.70552	949	230.531	156	305	218774	21.7924	2.72222	341.656	193	576	324232	73.7235	2.70552	949	341.656	193	576	324232	73.7235	2.72222	1	px	Intensity	1.30389
Merged	6851.95	4517.68	-5635	-5767.1	289	1062	123.478	95	161	131134	9.99109	2.70552	1062	123.478	95	161	131134	9.99109	2.72222	254.61	187	339	270396	24.1818	2.70552	1062	254.61	187	339	270396	24.1818	2.72222	386.291	205	1155	410241	135.099	2.70552	1062	386.291	205	1155	410241	135.099	2.72222	1	px	Intensity	1.30387
Merged	6851.95	4517.68	-5635	-5767.1	164	850	110.453	96	144	93885	5.85233	2.70552	850	110.453	96	144	93885	5.85233	2.72222	213.906	170	256	181820	15.3538	2.70552	850	213.906	170	256	181820	15.3538	2.72222	364.192	252	543	309563	63.954	2.70552	850	364.192	252	543	309563	63.954	2.72222	1	px	Intensity	1.30372
Merged	6851.95	4517.68	-5635	-5767.1	317	494	120.482	100	157	59518	9.05875	2.70552	494	120.482	100	157	59518	9.05875	2.72222	268.37	202	334	132575	23.7378	2.70552	494	268.37	202	334	132575	23.7378	2.72222	352.494	183	609	174132	87.3725	2.70552	494	352.494	183	609	174132	87.3725	2.72222	1	px	Intensity	1.3031
Merged	6851.95	4517.68	-5635	-5767.1	244	1599	114.418	88	149	182955	7.30152	2.70552	1599	114.418	88	149	182955	7.30152	2.72222	230.512	175	289	368588	16.6229	2.70552	1599	230.512	175	289	368588	16.6229	2.72222	375.36	179	596	600201	88.4558	2.70552	1599	375.36	179	596	600201	88.4558	2.72222	1	px	Intensity	1.30224
Merged	6851.95	4517.68	-5635	-5767.1	161	1133	112.933	79	147	127953	7.06938	2.70552	1133	112.933	79	147	127953	7.06938	2.72222	222.85	168	289	252489	16.5679	2.70552	1133	222.85	168	289	252489	16.5679	2.72222	340.929	211	536	386272	67.8704	2.70552	1133	340.929	211	536	386272	67.8704	2.72222	1	px	Intensity	1.30166
Merged	6851.95	4517.68	-5635	-5767.1	290	1103	109.941	89	143	121265	6.00265	2.70552	1103	109.941	89	143	121265	6.00265	2.72222	215.385	152	271	237570	15.7004	2.70552	1103	215.385	152	271	237570	15.7004	2.72222	364.695	229	570	402259	67.0322	2.70552	1103	364.695	229	570	402259	67.0322	2.72222	1	px	Intensity	1.3007
Merged	6851.95	4517.68	-5635	-5767.1	178	332	119.395	76	155	39639	9.81983	2.70552	332	119.395	76	155	39639	9.81983	2.72222	259.503	197	319	86155	25.1549	2.70552	332	259.503	197	319	86155	25.1549	2.72222	313.729	195	543	104158	86.7291	2.70552	332	313.729	195	543	104158	86.7291	2.72222	1	px	Intensity	1.29822
Merged	6851.95	4517.68	-5635	-5767.1	118	1021	114.038	91	148	116433	7.57453	2.70552	1021	114.038	91	148	116433	7.57453	2.72222	227.591	175	294	232370	17.5484	2.70552	1021	227.591	175	294	232370	17.5484	2.72222	344.206	200	524	351434	75.3115	2.70552	1021	344.206	200	524	351434	75.3115	2.72222	1	px	Intensity	1.29781
Merged	6851.95	4517.68	-5635	-5767.1	86	1421	111.728	87	145	158765	6.70211	2.70552	1421	111.728	87	145	158765	6.70211	2.72222	213.161	168	268	302902	16.2332	2.70552	1421	213.161	168	268	302902	16.2332	2.72222	369.875	204	562	525592	74.288	2.70552	1421	369.875	204	562	525592	74.288	2.72222	1	px	Intensity	1.2978
Merged	6851.95	4517.68	-5635	-5767.1	17	859	110.978	88	144	95330	7.1574	2.70552	859	110.978	88	144	95330	7.1574	2.72222	211.084	149	265	181321	16.2008	2.70552	859	211.084	149	265	181321	16.2008	2.72222	353.525	221	564	303678	63.8388	2.70552	859	353.525	221	564	303678	63.8388	2.72222	1	px	Intensity	1.29756
Merged	6851.95	4517.68	-5635	-5767.1	149	421	115.651	87	150	48689	7.90554	2.70552	421	115.651	87	150	48689	7.90554	2.72222	232.401	182	289	97841	19.306	2.70552	421	232.401	182	289	97841	19.306	2.72222	354.207	226	540	149121	74.7402	2.70552	421	354.207	226	540	149121	74.7402	2.72222	1	px	Intensity	1.29701
Merged	6851.95	4517.68	-5635	-5767.1	52	1135	109.484	77	142	124264	5.8948	2.70552	1135	109.484	77	142	124264	5.8948	2.72222	204.603	163	254	232224	15.1515	2.70552	1135	204.603	163	254	232224	15.1515	2.72222	387.693	203	566	440031	79.474	2.70552	1135	387.693	203	566	440031	79.474	2.72222	1	px	Intensity	1.297
Merged	6851.95	4517.68	-5635	-5767.1	357	796	107.182	96	139	85317	4.54481	2.70552	796	107.182	96	139	85317	4.54481	2.72222	203.322	161	255	161844	13.7392	2.70552	796	203.322	161	255	161844	13.7392	2.72222	501.921	427	588	399529	25.4197	2.70552	796	501.921	427	588	399529	25.4197	2.72222	1	px	Intensity	1.29686
Merged	6851.95	4517.68	-5635	-5767.1	238	438	114.151	93	148	49998	7.6987	2.70552	438	114.151	93	148	49998	7.6987	2.72222	227.653	184	282	99712	15.7213	2.70552	438	227.653	184	282	99712	15.7213	2.72222	308.932	173	518	135312	98.6537	2.70552	438	308.932	173	518	135312	98.6537	2.72222	1	px	Intensity	1.29653
Merged	6851.95	4517.68	-5635	-5767.1	218	450	111.856	89	145	50335	7.16664	2.70552	450	111.856	89	145	50335	7.16664	2.72222	221.204	175	281	99542	17.0422	2.70552	450	221.204	175	281	99542	17.0422	2.72222	373.371	253	564	168017	71.122	2.70552	450	373.371	253	564	168017	71.122	2.72222	1	px	Intensity	1.29631
Merged	6851.95	4517.68	-5635	-5767.1	405	311	115.752	86	150	35999	8.76209	2.70552	311	115.752	86	150	35999	8.76209	2.72222	233.068	182	292	72484	19.0852	2.70552	311	233.068	182	292	72484	19.0852	2.72222	315.566	176	533	98141	99.8861	2.70552	311	315.566	176	533	98141	99.8861	2.72222	1	px	Intensity	1.29587
Merged	6851.95	4517.68	-5635	-5767.1	57	647	111.907	83	145	72404	7.43277	2.70552	647	111.907	83	145	72404	7.43277	2.72222	216.645	161	262	140169	15.4454	2.70552	647	216.645	161	262	140169	15.4454	2.72222	327.964	185	572	212193	92.3831	2.70552	647	327.964	185	572	212193	92.3831	2.72222	1	px	Intensity	1.29572
Merged	6851.95	4517.68	-5635	-5767.1	284	849	116.635	91	151	99023	7.28205	2.70552	849	116.635	91	151	99023	7.28205	2.72222	238.642	172	319	202607	17.0984	2.70552	849	238.642	172	319	202607	17.0984	2.72222	366.934	201	578	311527	77.0271	2.70552	849	366.934	201	578	311527	77.0271	2.72222	1	px	Intensity	1.29464
Merged	6851.95	4517.68	-5635	-5767.1	416	504	111.365	96	144	56128	6.0337	2.70552	504	111.365	96	144	56128	6.0337	2.72222	212.349	171	252	107024	14.7032	2.70552	504	212.349	171	252	107024	14.7032	2.72222	319.919	165	548	161239	99.0514	2.70552	504	319.919	165	548	161239	99.0514	2.72222	1	px	Intensity	1.29304
Merged	6851.95	4517.68	-5635	-5767.1	229	668	113.708	90	147	75957	7.13019	2.70552	668	113.708	90	147	75957	7.13019	2.72222	223.398	179	276	149230	15.8514	2.70552	668	223.398	179	276	149230	15.8514	2.72222	351.326	220	640	234686	70.4193	2.70552	668	351.326	220	640	234686	70.4193	2.72222	1	px	Intensity	1.29278
Merged	6851.95	4517.68	-5635	-5767.1	65	482	113.737	94	147	54821	7.25938	2.70552	482	113.737	94	147	54821	7.25938	2.72222	220.512	182	265	106287	14.9815	2.70552	482	220.512	182	265	106287	14.9815	2.72222	326.378	201	585	157314	87.8185	2.70552	482	326.378	201	585	157314	87.8185	2.72222	1	px	Intensity	1.29246
Merged	6851.95	4517.68	-5635	-5767.1	395	956	117.624	98	152	112449	8.02313	2.70552	956	117.624	98	152	112449	8.02313	2.72222	242.912	191	296	232224	18.3413	2.70552	956	242.912	191	296	232224	18.3413	2.72222	330.681	199	540	316131	84.1736	2.70552	956	330.681	199	540	316131	84.1736	2.72222	1	px	Intensity	1.29225
Merged	6851.95	4517.68	-5635	-5767.1	135	757	110.661	91	143	83770	6.14733	2.70552	757	110.661	91	143	83770	6.14733	2.72222	217.456	177	275	164614	14.904	2.70552	757	217.456	177	275	164614	14.904	2.72222	320.849	190	537	242883	90.1148	2.70552	757	320.849	190	537	242883	90.1148	2.72222	1	px	Intensity	1.29224
Merged	6851.95	4517.68	-5635	-5767.1	434	527	112.25	95	145	59156	6.48748	2.70552	527	112.25	95	145	59156	6.48748	2.72222	224.08	179	267	118090	16.2273	2.70552	527	224.08	179	267	118090	16.2273	2.72222	301.454	177	519	158866	93.1153	2.70552	527	301.454	177	519	158866	93.1153	2.72222	1	px	Intensity	1.29175
Merged	6851.95	4517.68	-5635	-5767.1	426	547	112.307	90	145	61432	7.04421	2.70552	547	112.307	90	145	61432	7.04421	2.72222	222.75	181	279	121844	15.6658	2.70552	547	222.75	181	279	121844	15.6658	2.72222	307.452	172	540	168176	97.6466	2.70552	547	307.452	172	540	168176	97.6466	2.72222	1	px	Intensity	1.2911
Merged	6851.95	4517.68	-5635	-5767.1	532	790	116.961	87	151	92399	8.28891	2.70552	790	116.961	87	151	92399	8.28891	2.72222	233.49	182	292	184457	17.153	2.70552	790	233.49	182	292	184457	17.153	2.72222	324.844	205	549	256627	79.8158	2.70552	790	324.844	205	549	256627	79.8158	2.72222	1	px	Intensity	1.29103
Merged	6851.95	4517.68	-5635	-5767.1	468	368	114.655	97	148	42193	9.16753	2.70552	368	114.655	97	148	42193	9.16753	2.72222	236.302	183	296	86959	21.1275	2.70552	368	236.302	183	296	86959	21.1275	2.72222	338.715	221	586	124647	83.5836	2.70552	368	338.715	221	586	124647	83.5836	2.72222	1	px	Intensity	1.29083
Merged	6851.95	4517.68	-5635	-5767.1	452	1268	114.692	82	148	145430	7.18253	2.70552	1268	114.692	82	148	145430	7.18253	2.72222	224.988	170	290	285285	16.1673	2.70552	1268	224.988	170	290	285285	16.1673	2.72222	343.448	197	578	435492	74.7244	2.70552	1268	343.448	197	578	435492	74.7244	2.72222	1	px	Intensity	1.29041
Merged	6851.95	4517.68	-5635	-5767.1	484	1401	112.409	75	145	157485	6.95655	2.70552	1401	112.409	75	145	157485	6.95655	2.72222	225.433	177	276	315831	16.1047	2.70552	1401	225.433	177	276	315831	16.1047	2.72222	391.902	228	971	549055	97.5835	2.70552	1401	391.902	228	971	549055	97.5835	2.72222	1	px	Intensity	1.28993
Merged	6851.95	4517.68	-5635	-5767.1	58	3739	107.841	88	139	403217	4.71808	2.70552	3739	107.841	88	139	403217	4.71808	2.72222	207.754	163	264	776792	14.3301	2.70552	3739	207.754	163	264	776792	14.3301	2.72222	502.225	389	611	1877818	28.736	2.70552	3739	502.225	389	611	1877818	28.736	2.72222	1	px	Intensity	1.28894
Merged	6851.95	4517.68	-5635	-5767.1	388	951	113.311	79	146	107759	6.93314	2.70552	951	113.311	79	146	107759	6.93314	2.72222	243.224	192	312	231306	21.234	2.70552	951	243.224	192	312	231306	21.234	2.72222	333.811	200	559	317454	77.2156	2.70552	951	333.811	200	559	317454	77.2156	2.72222	1	px	Intensity	1.28849
Merged	6851.95	4517.68	-5635	-5767.1	130	901	113.331	96	146	102111	7.32507	2.70552	901	113.331	96	146	102111	7.32507	2.72222	218.969	166	262	197291	16.0188	2.70552	901	218.969	166	262	197291	16.0188	2.72222	345.008	227	542	310852	66.205	2.70552	901	345.008	227	542	310852	66.205	2.72222	1	px	Intensity	1.28826
Merged	6851.95	4517.68	-5635	-5767.1	47	287	117.216	96	151	33641	7.04456	2.70552	287	117.216	96	151	33641	7.04456	2.72222	239.449	189	295	68722	16.4045	2.70552	287	239.449	189	295	68722	16.4045	2.72222	347.3	235	539	99675	77.8999	2.70552	287	347.3	235	539	99675	77.8999	2.72222	1	px	Intensity	1.28822
Merged	6851.95	4517.68	-5635	-5767.1	544	840	113.377	88	146	95237	7.61577	2.70552	840	113.377	88	146	95237	7.61577	2.72222	234.65	173	304	197106	20.4233	2.70552	840	234.65	173	304	197106	20.4233	2.72222	312.12	181	537	262181	89.6783	2.70552	840	312.12	181	537	262181	89.6783	2.72222	1	px	Intensity	1.28773
Merged	6851.95	4517.68	-5635	-5767.1	151	806	110.321	95	142	88919	7.17163	2.70552	806	110.321	95	142	88919	7.17163	2.72222	207.533	160	253	167272	15.6517	2.70552	806	207.533	160	253	167272	15.6517	2.72222	317.527	160	556	255927	93.4804	2.70552	806	317.527	160	556	255927	93.4804	2.72222	1	px	Intensity	1.28715
Merged	6851.95	4517.68	-5635	-5767.1	393	455	111.13	83	143	50564	6.30782	2.70552	455	111.13	83	143	50564	6.30782	2.72222	219.879	172	267	100045	15.6809	2.70552	455	219.879	172	267	100045	15.6809	2.72222	337.068	213	603	153366	76.3171	2.70552	455	337.068	213	603	153366	76.3171	2.72222	1	px	Intensity	1.28679
Merged	6851.95	4517.68	-5635	-5767.1	87	475	114.274	93	147	54280	7.861	2.70552	475	114.274	93	147	54280	7.861	2.72222	230.183	178	274	109337	17.8996	2.70552	475	230.183	178	274	109337	17.8996	2.72222	344.857	220	541	163807	72.6255	2.70552	475	344.857	220	541	163807	72.6255	2.72222	1	px	Intensity	1.28639
[truncated: 254 more rows]
[truncated: 1 more columns]

## Sheet: E253A-2
FileName	Time (ms)	Z Pos	X Pos	Y Pos	ROI ID	ROI Area	ROI Mean Intensity(Red)	ROI Min Intensity(Red)	ROI Max Intensity(Red)	ROI Sum Intensity(Red)	ROI StDev Intensity(Red)	ROI Signal/Background(Red)	Binary Area(Red)	Binary Mean Intensity(Red)	Binary Min Intensity(Red)	Binary Max Intensity(Red)	Binary Sum Intensity(Red)	Binary StDev Intensity(Red)	Binary Signal/Background(Red)	ROI Mean Intensity(Blue)	ROI Min Intensity(Blue)	ROI Max Intensity(Blue)	ROI Sum Intensity(Blue)	ROI StDev Intensity(Blue)	ROI Signal/Background(Blue)	Binary Area(Blue)	Binary Mean Intensity(Blue)	Binary Min Intensity(Blue)	Binary Max Intensity(Blue)	Binary Sum Intensity(Blue)	Binary StDev Intensity(Blue)	Binary Signal/Background(Blue)	ROI Mean Intensity(Mono)	ROI Min Intensity(Mono)	ROI Max Intensity(Mono)	ROI Sum Intensity(Mono)	ROI StDev Intensity(Mono)	ROI Signal/Background(Mono)	Binary Area(Mono)	Binary Mean Intensity(Mono)	Binary Min Intensity(Mono)	Binary Max Intensity(Mono)	Binary Sum Intensity(Mono)	Binary StDev Intensity(Mono)	Binary Signal/Background(Mono)	Area Fraction	Unit	Channel	Red ratio
[truncated: 480 more rows]
[truncated: 1 more columns]

[truncated: 2 more sheets: E253A-3, E253A-4]
